# Supplementary material for: One-pot C(sp3)–H difluoroalkylation of tetrahydroisoquinolines and isochromans via electrochemical oxidation and organozinc alkylation
Source: Royal Society of Chemistry journal article supplement (doi:10.1039/d4cc02033b), 2024-01-01

## Electronic Supplementary Information

### One-pot C(sp<sup>3</sup>)-H difluoroalkylation of tetrahydroisoquinolines and isochromans via electrochemical oxidation and organozinc alkylation

Kazuya Kamata,<sup>a</sup> Masami Kuriyama,<sup>a,\*</sup> Hironobu Tahara,<sup>b</sup> Akira Nishikawa,<sup>a</sup>  
Kosuke Yamamoto,<sup>a</sup> Yosuke Demizu,<sup>c</sup> and Osamu Onomura<sup>a,\*</sup>

<sup>a</sup> Graduate School of Biomedical Sciences, Nagasaki University,  
1-14 Bunkyo-machi, Nagasaki 852-8521, Japan

<sup>b</sup> Graduate School of Engineering, Nagasaki University,  
1-14 Bunkyo-machi, Nagasaki 852-8521, Japan

<sup>c</sup> Division of Organic Chemistry, National Institute of Health Sciences,  
3-25-26 Tonomachi, Kawasaki, Kanagawa 210-9501, Japan

mkuriyam@nagasaki-u.ac.jp; onomura@nagasaki-u.ac.jp

#### Table of Contents

|                                                          |         |
|----------------------------------------------------------|---------|
| 1. General information                                   | S2      |
| 2. Experimental procedures and characterization data     |         |
| 2.1. Experimental setup for the electrochemical reaction | S3      |
| 2.2. MS analysis of the first step                       | S4      |
| 2.3. Cyclic voltammetry                                  | S5      |
| 2.4. Compounds <b>3</b> and <b>5</b>                     | S5-S21  |
| 2.5. Gram-scale experiment                               | S22     |
| 2.6. Compound <b>6</b>                                   | S22-S23 |
| 2.7. Synthesis of substrates                             | S23-S26 |
| 3. References                                            | S27     |
| 4. NMR spectra                                           | S28-S98 |

## 1. General information

All melting points were measured with Yanako MP-J3 and uncorrected. IR spectra were obtained with Shimadzu IRAffinity-1, and absorptions were reported in  $\text{cm}^{-1}$ .  $^1\text{H}$  NMR,  $^{13}\text{C}$  NMR, and  $^{19}\text{F}$  NMR spectra were recorded with Varian NMR System 500PS SN and JEOL JNM-ECZ400R (500 or 400 MHz for  $^1\text{H}$  NMR, 125 MHz for  $^{13}\text{C}$  NMR, 376 MHz for  $^{19}\text{F}$  NMR). Chemical shift values are expressed in parts per million relative to internal TMS ( $\delta$  0.00 for  $^1\text{H}$  NMR) or  $\text{CDCl}_3$  ( $\delta$  77.0 for  $^{13}\text{C}$  NMR). Abbreviations are as follow: s, singlet; d, doublet; t, triplet; q, quartet; m, multiplet; br, broad. Mass spectra (MS) and high resolution mass spectra (HRMS) were recorded on JEOL JMS-T100TD (time-of-flight mass spectrometer) with direct analysis in real time (DART) method. Cyclic Voltammetry (CV) was performed with Gamry Reference 600. All reactions were carried out under an argon atmosphere unless otherwise noted. Chemicals were purchased from Sigma-Aldrich, Tokyo Chemical Industry, FUJIFILM Wako Pure Chemicals, and Nacalai tesque and used as received unless otherwise noted. Dry DMSO, DMF, MeCN, and  $\text{CH}_2\text{Cl}_2$  were bought from FUJIFILM Wako Pure Chemicals, and dry THF was purchased from Kanto Chemical. AcOEt was distilled and stored over  $3\text{\AA}$  molecular sieves. Toluene was distilled from sodium benzophenone ketyl under an argon atmosphere.  $\text{CF}_3\text{CH}_2\text{OH}$  and EtOH were dried over  $3\text{\AA}$  molecular sieves before use. Tetrahydroisoquinolines **1a-d**,<sup>1</sup> **1e**,<sup>2</sup> **1f-g**,<sup>3</sup> **1h-i**,<sup>4</sup> **1j**,<sup>5</sup> **1k**,<sup>1</sup> **1m**,<sup>1</sup> **1n**,<sup>2</sup> **1o**,<sup>1</sup> **1q**,<sup>5</sup> **1s**,<sup>6</sup> fluorinated reagents for the preparation of **2b**,<sup>7</sup> **2c**,<sup>8</sup> **2d-e**,<sup>9</sup> **2f**,<sup>7</sup> **2g**,<sup>10</sup> and isochromans **4c-d**<sup>11</sup>, **4e**<sup>12</sup> were prepared as reported. The products were isolated by silica gel column chromatography with Fuji Silysia PSQ 60B and PSQ100B.

## 2. Experimental procedures and characterization data

### 2.1. Experimental setup for the electrochemical reaction

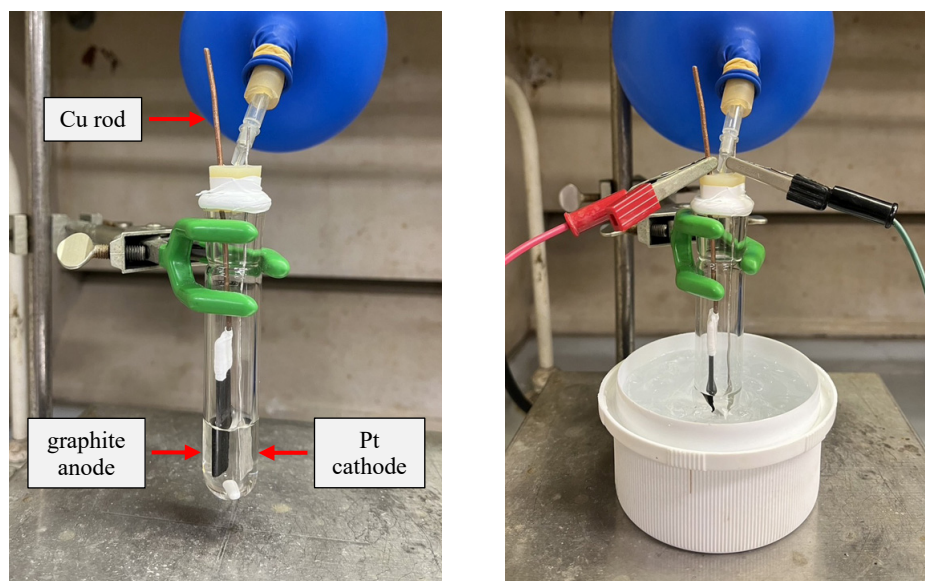

**Figure S1.** Experimental setup for a small-scale reaction

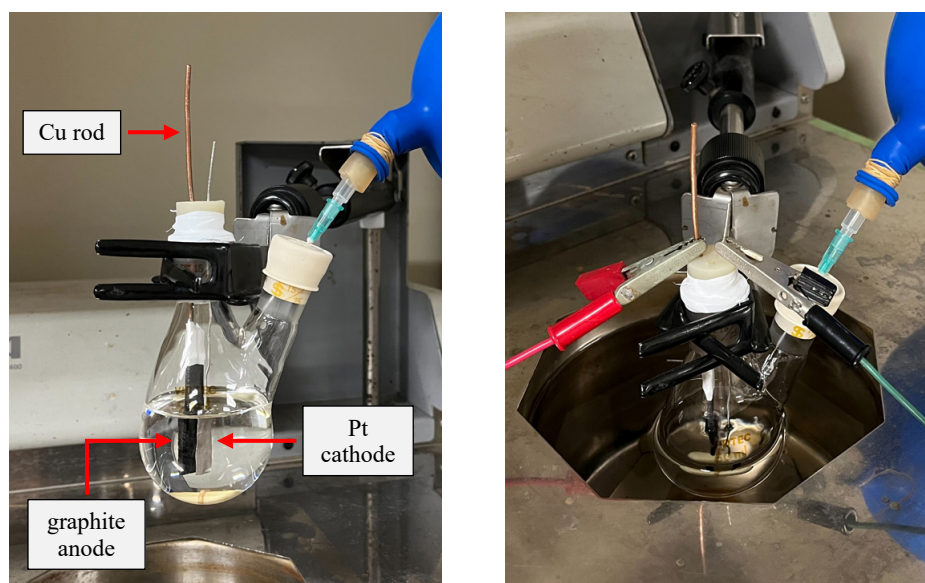

**Figure S2.** Experimental setup for a gram-scale reaction

## 2.2. MS analysis of the first step

The reaction was carried out in a cylinder-type undivided cell equipped with a graphite anode (1 x 5 cm<sup>2</sup>) and a platinum cathode (1 x 2 cm<sup>2</sup>) (distance between the anode and cathode: 1 cm). After the reaction vessel was charged with 2-phenyl-1,2,3,4-tetrahydroisoquinoline (**1a**) (104.6 mg, 0.5 mmol) and Et<sub>4</sub>NBr (21.0 mg, 0.1 mmol), dry MeCN (4.0 mL) and CF<sub>3</sub>CH<sub>2</sub>OH (200.1 mg, 2.0 mmol) were added. Then, a constant current (5 mA, 2.7 F/mol) was supplied at 0 °C with magnetic stirring. After concentration of the reaction mixture, MS analysis was conducted. The detected data was consistent with that of 2-phenyl-1-(2,2,2-trifluoroethoxy)-1,2,3,4-tetrahydroisoquinoline, which could not be isolated by silica gel column chromatography because of its lability. MS (DART) *m/z*: 308 [M+H]<sup>+</sup>.

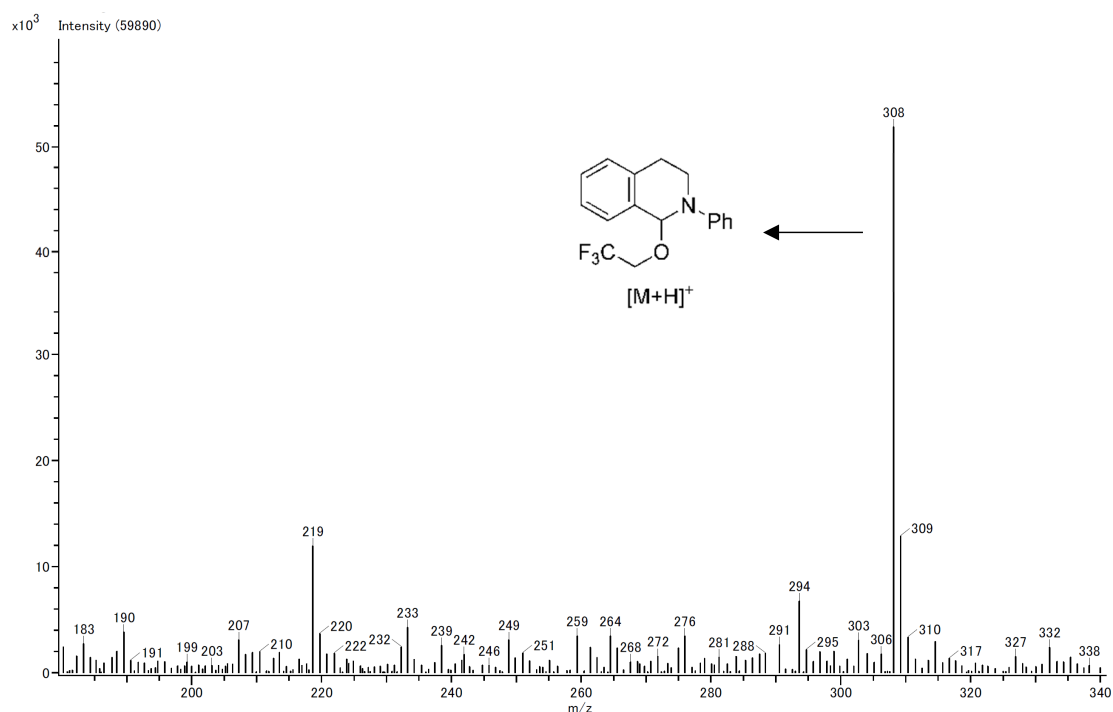

**Figure S3.** MS analysis of the first step

### 2.3. Cyclic voltammetry

A glassy carbon electrode (surface area: 0.0201 cm<sup>2</sup>), an Au wire electrode, and a Ag/Ag<sup>+</sup> electrode (AgNO<sub>3</sub> (10 mM) and Et<sub>4</sub>NBF<sub>4</sub> (0.1 M) in MeCN) were used as working, counter, and reference electrodes, respectively. To prevent any leakage of AgNO<sub>3</sub> into the sample solution, a double junction configuration was used in constructing the reference electrode. Cyclic voltammetry was performed at 50 mV/s under rt using samples (5 mM) in the electrolyte solution (Et<sub>4</sub>NBF<sub>4</sub> (0.1 M) in MeCN). The redox potentials were calibrated with ferrocene as a standard.

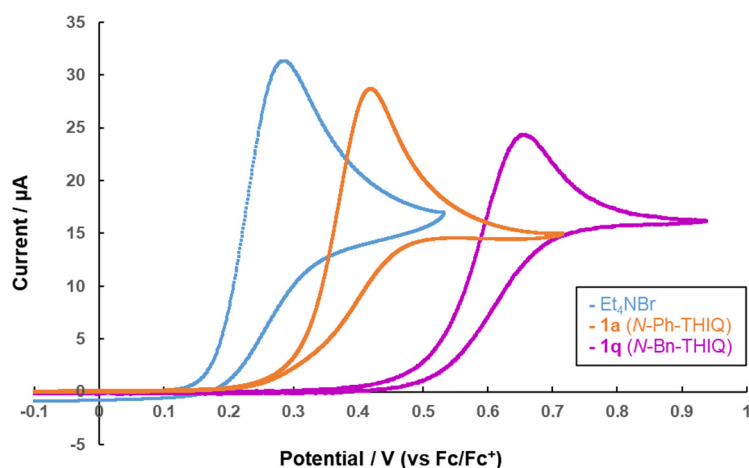

**Figure S4.** Cyclic voltammograms of Et<sub>4</sub>NBr, **1a**, and **1q**

### 2.4. Typical procedure for the one-pot difluoroalkylation via electrochemical oxidation

The reactions were carried out in a cylinder-type undivided cell equipped with a graphite anode (1 x 5 cm<sup>2</sup>) and a platinum cathode (1 x 2 cm<sup>2</sup>) (distance between the anode and cathode: 1 cm). After the reaction vessel was charged with 2-phenyl-1,2,3,4-tetrahydroisoquinoline (**1a**) (104.6 mg, 0.5 mmol) and Et<sub>4</sub>NBr (21.0 mg, 0.1 mmol), dry MeCN (4.0 mL) and CF<sub>3</sub>CH<sub>2</sub>OH (200.1 mg, 2.0 mmol) were added. Then, a constant current (5 mA, 2.7 F/mol) was supplied at 0 °C with magnetic stirring. To the undivided cell was added the organozinc reagent (1.13 mL, 0.78 M in THF) prepared through stirring the mixture of Zn powder (118 mg, 1.8 mmol) and ethyl 2-bromo-2,2-difluoroacetate (406 mg, 2 mmol) in dry THF (2 mL) at rt for 5 min.<sup>13</sup> The reaction mixture was stirred at rt for 6 h. Water was added, and then the resulting mixture was extracted with AcOEt. The combined organic layers were dried over Na<sub>2</sub>SO<sub>4</sub>. Concentration and purification through silica gel column chromatography gave the desired product **3aa**.

**Ethyl 2,2-difluoro-2-(2-phenyl-1,2,3,4-tetrahydroisoquinolin-1-yl)acetate<sup>14</sup> (3aa)**

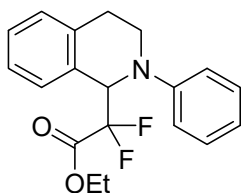

Silica gel column chromatography (hexane/AcOEt = 20/1) gave 133.6 mg (0.403 mmol, 81% yield) of the product as colorless oil. <sup>1</sup>H NMR (400 MHz, CDCl<sub>3</sub>): δ 7.39 (d, *J* = 6.9 Hz, 1H), 7.29-7.26 (m, 1H), 7.24-7.20 (m, 3H), 7.16 (d, *J* = 7.3 Hz, 1H), 6.95 (d, *J* = 8.2 Hz, 2H), 6.85 (t, *J* = 7.3 Hz, 1H), 5.29 (dd, *J* = 19.7, 10.5 Hz, 1H), 4.26-4.10 (m, 2H), 3.73-3.80 (m, 1H), 3.67-3.64 (m, 1H), 3.00-2.91 (m, 1H), 2.73 (dt, *J* = 16.5, 3.7 Hz, 1H), 1.15 (t, *J* = 7.1 Hz, 3H). <sup>13</sup>C NMR (125 MHz, CDCl<sub>3</sub>): δ 163.9 (dd, *J* = 34.3, 30.5 Hz, C), 149.3 (C), 136.6 (C), 129.15 (CH), 129.13 (CH), 128.5 (C), 128.3 (d, *J* = 4.8 Hz, CH), 128.2 (CH), 126.1 (CH), 120.1 (CH), 117.0 (CH), 116.6 (dd, *J* = 262.3, 258.5 Hz, C), 62.7 (CH<sub>2</sub>), 60.7 (dd, *J* = 27.7, 22.9 Hz, CH), 43.4 (d, *J* = 4.8 Hz, CH<sub>2</sub>), 25.0 (CH<sub>2</sub>), 13.8 (CH<sub>3</sub>). <sup>19</sup>F NMR (376 MHz, CDCl<sub>3</sub>): δ -101.3 (ddd, *J* = 252.2, 10.1, 3.6 Hz, 1F), -111.4 (dd, *J* = 252.2, 19.5 Hz, 1F). IR (ATR): 1760, 1600, 1200, 1070, 740 cm<sup>-1</sup>. HRMS (DART): *m/z* [M+H]<sup>+</sup> Calcd for C<sub>19</sub>H<sub>20</sub>F<sub>2</sub>NO<sub>2</sub>: 332.1462; found: 332.1466.

**Ethyl 2,2-difluoro-2-(2-(4-fluorophenyl)-1,2,3,4-tetrahydroisoquinolin-1-yl)acetate (3ba)**

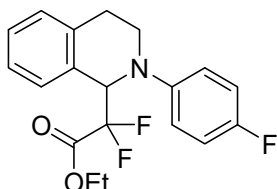

Silica gel column chromatography (hexane/AcOEt = 20/1) gave 134.3 mg (0.384 mmol, 77% yield) of the product as colorless oil. <sup>1</sup>H NMR (400 MHz, CDCl<sub>3</sub>): δ 7.41-7.39 (m, 1H), 7.31-7.23 (m, 2H), 7.17 (d, *J* = 7.3 Hz, 1H), 6.94-6.85 (m, 4H), 5.13 (dd, *J* = 20.1, 10.1 Hz, 1H), 4.28-4.16 (m, 2H), 3.78-3.71 (m, 1H), 3.54-3.51 (m, 1H), 2.93-2.85 (m, 1H), 2.68 (dt, *J* = 16.5, 3.7 Hz, 1H), 1.16 (t, *J* = 7.1 Hz, 3H). <sup>13</sup>C NMR (125 MHz, CDCl<sub>3</sub>): δ 163.9 (dd, *J* = 29.6, 34.3 Hz, C), 157.5 (d, *J* = 239.4 Hz, C), 146.1 (C), 136.6 (C), 129.2 (CH), 128.32 (d, *J* = 5.7 Hz, CH), 128.27 (CH), 128.2 (C), 126.3 (CH), 119.5 (d, *J* = 7.6 Hz, CH), 116.5 (dd, *J* = 263.2, 258.5 Hz, C), 115.6 (d, *J* = 22.9 Hz, CH), 62.7 (CH<sub>2</sub>), 61.1 (dd, *J* = 27.7, 23.8 Hz, CH), 44.7 (d, *J* = 5.7 Hz, CH<sub>2</sub>), 24.6 (CH<sub>2</sub>), 13.9 (CH<sub>3</sub>). <sup>19</sup>F NMR (376 MHz, CDCl<sub>3</sub>): δ -101.1 (ddd, *J* = 252.9, 10.1, 3.6 Hz, 1F), -112.6 (dd, *J* = 252.9, 20.2 Hz, 1F), -123.3 (s, 1F). IR (ATR): 1770, 1510, 1190, 1070, 750 cm<sup>-1</sup>. HRMS (DART): *m/z* [M+H]<sup>+</sup> Calcd for C<sub>19</sub>H<sub>19</sub>F<sub>3</sub>NO<sub>2</sub>: 350.1368; found: 350.1355.

### Ethyl 2-(2-(4-chlorophenyl)-1,2,3,4-tetrahydroisoquinolin-1-yl)-2,2-difluoroacetate (3ca)

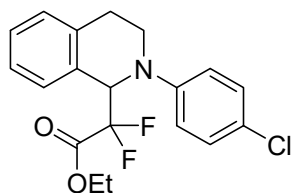

Silica gel column chromatography (hexane/AcOEt = 20/1) gave 144.1 mg (0.394 mmol, 79% yield) of the product as colorless oil.  $^1\text{H}$  NMR (400 MHz,  $\text{CDCl}_3$ ):  $\delta$  7.37 (d,  $J = 6.9$  Hz, 1H), 7.31-7.27 (m, 1H), 7.25-7.22 (m, 1H), 7.19-7.16 (m, 3H), 6.87 (d,  $J = 9.2$  Hz, 2H), 5.22 (dd,  $J = 18.8, 11.0$  Hz, 1H), 4.28-4.13 (m, 2H), 3.80-3.72 (m, 1H), 3.62-3.56 (m, 1H), 2.97-2.89 (m, 1H), 2.76 (dt,  $J = 16.5, 4.1$  Hz, 1H), 1.17 (t,  $J = 7.1$  Hz, 3H).  $^{13}\text{C}$  NMR (125 MHz,  $\text{CDCl}_3$ ):  $\delta$  163.8 (dd,  $J = 33.4, 30.5$  Hz, C), 147.9 (C), 136.4 (C), 129.1 (CH), 129.0 (CH), 128.4 (CH), 128.3 (d,  $J = 4.8$  Hz, CH), 128.2 (C), 126.3 (CH), 125.0 (C), 118.0 (CH), 116.4 (dd,  $J = 263.2, 258.5$  Hz, C), 62.8 ( $\text{CH}_2$ ), 60.8 (dd,  $J = 27.7, 22.9$  Hz, CH), 43.6 (d,  $J = 4.8$  Hz,  $\text{CH}_2$ ), 25.0 ( $\text{CH}_2$ ), 13.8 ( $\text{CH}_3$ ).  $^{19}\text{F}$  NMR (376 MHz,  $\text{CDCl}_3$ ):  $\delta$  -101.9 (ddd,  $J = 252.9, 10.8, 2.9$  Hz, 1F), -111.2 (dd,  $J = 252.9, 18.8$  Hz, 1F). IR (ATR): 1760, 1490, 1210, 1110, 1060, 750  $\text{cm}^{-1}$ . HRMS (DART):  $m/z$   $[\text{M}+\text{H}]^+$  Calcd for  $\text{C}_{19}\text{H}_{19}^{35}\text{ClF}_2\text{NO}_2$ : 366.1072; found: 366.1081.

### Ethyl 2-(2-(4-bromophenyl)-1,2,3,4-tetrahydroisoquinolin-1-yl)-2,2-difluoroacetate (3da)

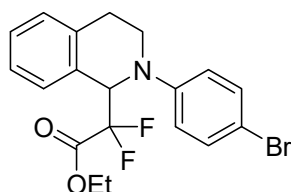

Silica gel column chromatography (hexane/AcOEt = 20/1) gave 150.5 mg (0.367 mmol, 73% yield) of the product as colorless oil.  $^1\text{H}$  NMR (400 MHz,  $\text{CDCl}_3$ ):  $\delta$  7.36 (d,  $J = 7.1$  Hz, 1H), 7.32-7.30 (m, 2H), 7.29-7.27 (m, 1H), 7.25-7.21 (m, 1H), 7.17 (d,  $J = 7.6$  Hz, 1H), 6.83 (d,  $J = 8.9$  Hz, 2H), 5.23 (dd,  $J = 18.5, 11.0$  Hz, 1H), 4.28-4.12 (m, 2H), 3.79-3.72 (m, 1H), 3.62-3.56 (m, 1H), 2.98-2.90 (m, 1H), 2.77 (dt,  $J = 16.5, 4.1$  Hz, 1H), 1.18 (t,  $J = 7.1$  Hz, 3H).  $^{13}\text{C}$  NMR (125 MHz,  $\text{CDCl}_3$ ):  $\delta$  163.8 (dd,  $J = 33.4, 29.6$  Hz, C), 148.3 (C), 136.4 (C), 132.0 (CH), 129.1 (CH), 128.4 (CH), 128.3 (d,  $J = 4.8$  Hz, CH), 128.2 (C), 126.3 (CH), 118.4 (CH), 116.3 (dd,  $J = 262.3, 258.5$  Hz, C), 112.2 (C), 62.9 ( $\text{CH}_2$ ), 60.8 (dd,  $J = 27.7, 23.8$  Hz, CH), 43.5 (d,  $J = 4.8$  Hz,  $\text{CH}_2$ ), 25.1 ( $\text{CH}_2$ ), 13.9 ( $\text{CH}_3$ ).  $^{19}\text{F}$  NMR (376 MHz,  $\text{CDCl}_3$ ):  $\delta$  -102.1 (ddd,  $J = 252.9, 10.8, 2.9$  Hz, 1F), -111.0 (dd,  $J = 252.9, 18.8$  Hz, 1F). IR (ATR): 1760, 1490, 1210, 1060, 750  $\text{cm}^{-1}$ . HRMS (DART):  $m/z$   $[\text{M}+\text{H}]^+$  Calcd for  $\text{C}_{19}\text{H}_{19}^{79}\text{BrF}_2\text{NO}_2$ : 410.0567; found: 410.0577.

### Ethyl 2-(2-(4-cyanophenyl)-1,2,3,4-tetrahydroisoquinolin-1-yl)-2,2-difluoroacetate (3ea)

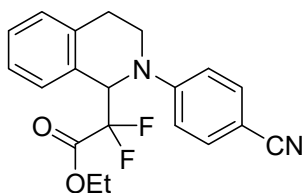

Silica gel column chromatography (hexane/AcOEt = 4/1) gave 104.0 mg (0.292 mmol, 58% yield) of the product as colorless oil.  $^1\text{H}$  NMR (400 MHz,  $\text{CDCl}_3$ ):  $\delta$  7.52 (d,  $J$  = 8.9 Hz, 2H), 7.33-7.29 (m, 2H), 7.26-7.21 (m, 2H), 7.00 (d,  $J$  = 8.9 Hz, 2H), 5.45 (t,  $J$  = 14.2 Hz, 1H), 4.27-4.11 (m, 2H), 3.87-3.80 (m, 1H), 3.69-3.63 (m, 1H), 3.02 (t,  $J$  = 6.0 Hz, 2H), 1.19 (t,  $J$  = 7.1 Hz, 3H).  $^{13}\text{C}$  NMR (125 MHz,  $\text{CDCl}_3$ ):  $\delta$  163.5 (dd,  $J$  = 32.4, 30.5 Hz, C), 151.6 (C), 136.0 (C), 133.4 (CH), 128.9 (CH), 128.8 (CH), 128.2 (d,  $J$  = 2.9 Hz, CH), 128.0 (d,  $J$  = 1.9 Hz, C), 126.4 (CH), 119.6 (C), 115.9 (t,  $J$  = 260.4 Hz, C), 114.2 (CH), 100.9 (C), 63.1 ( $\text{CH}_2$ ), 60.4 (dd,  $J$  = 26.7, 23.8 Hz, CH), 42.6 (d,  $J$  = 2.9 Hz,  $\text{CH}_2$ ), 26.2 (d,  $J$  = 1.9 Hz,  $\text{CH}_2$ ), 13.7 ( $\text{CH}_3$ ).  $^{19}\text{F}$  NMR (376 MHz,  $\text{CDCl}_3$ ):  $\delta$  -105.6 (dd,  $J$  = 252.9, 13.7 Hz, 1F), -107.9 (dd,  $J$  = 252.9, 14.5 Hz, 1F). IR (ATR): 2210, 1750, 1520, 1180, 1110, 750  $\text{cm}^{-1}$ . HRMS (DART):  $m/z$   $[\text{M}+\text{H}]^+$  Calcd for  $\text{C}_{20}\text{H}_{19}\text{F}_2\text{N}_2\text{O}_2$ : 357.1415; found: 357.1402.

### Ethyl 2,2-difluoro-2-(2-(4-(methoxycarbonyl)phenyl)-1,2,3,4-tetrahydroisoquinolin-1-yl)acetate (3fa)

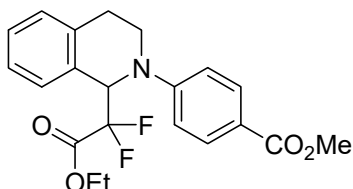

Silica gel column chromatography (hexane/AcOEt = 10/1) gave 128.7 mg (0.331 mmol, 66% yield) of the product as colorless oil.  $^1\text{H}$  NMR (400 MHz,  $\text{CDCl}_3$ ):  $\delta$  7.92 (d,  $J$  = 9.2 Hz, 2H), 7.35-7.28 (m, 2H), 7.25-7.19 (m, 2H), 6.97 (d,  $J$  = 9.2 Hz, 2H), 5.47 (dd,  $J$  = 16.5, 12.4 Hz, 1H), 4.25-4.08 (m, 2H), 3.86 (s, 3H), 3.84-3.80 (m, 1H), 3.76-3.70 (m, 1H), 3.06-2.90 (m, 2H), 1.16 (t,  $J$  = 7.1 Hz, 3H).  $^{13}\text{C}$  NMR (125 MHz,  $\text{CDCl}_3$ ):  $\delta$  166.9 (C), 163.7 (dd,  $J$  = 33.4, 30.5 Hz, C), 152.3 (C), 136.2 (C), 131.2 (CH), 129.0 (CH), 128.6 (CH), 128.34 (C), 128.31 (CH), 126.3 (CH), 120.3 (C), 116.1 (dd,  $J$  = 261.3, 259.4 Hz, C), 113.9 (CH), 63.1 ( $\text{CH}_2$ ), 60.4 (dd,  $J$  = 27.7, 23.8 Hz, CH), 51.7 ( $\text{CH}_3$ ), 42.6 (d,  $J$  = 3.8 Hz,  $\text{CH}_2$ ), 26.0 ( $\text{CH}_2$ ), 13.8 ( $\text{CH}_3$ ).  $^{19}\text{F}$  NMR (376 MHz,  $\text{CDCl}_3$ ):  $\delta$  -103.8 (ddd,  $J$  = 252.9, 12.3, 2.2 Hz, 1F), -109.0 (dd,  $J$  = 252.9, 16.6 Hz, 1F). IR (ATR): 1770, 1710, 1520, 1190, 1110, 740  $\text{cm}^{-1}$ . HRMS (DART):  $m/z$   $[\text{M}+\text{H}]^+$  Calcd for  $\text{C}_{21}\text{H}_{22}\text{F}_2\text{NO}_4$ : 390.1517; found: 390.1513.



**Ethyl 2-(2-(4-acetylphenyl)-1,2,3,4-tetrahydroisoquinolin-1-yl)-2,2-difluoroacetate (3ga)**

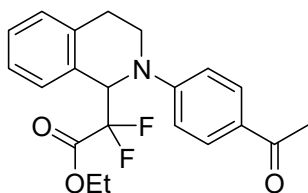

Silica gel column chromatography (hexane/AcOEt = 4/1) gave 123.6 mg (0.331 mmol, 66% yield) of the product as pale yellow oil. <sup>1</sup>H NMR (400 MHz, CDCl<sub>3</sub>): δ 7.88 (d, *J* = 8.9 Hz, 2H), 7.34-7.28 (m, 2H), 7.26-7.19 (m, 2H), 6.99 (d, *J* = 8.9 Hz, 2H), 5.49 (dd, *J* = 15.8, 13.0 Hz, 1H), 4.26-4.10 (m, 2H), 3.88-3.81 (m, 1H), 3.77-3.71 (m, 1H), 3.07-2.93 (m, 2H), 2.52 (s, 3H), 1.18 (t, *J* = 7.1 Hz, 3H). <sup>13</sup>C NMR (125 MHz, CDCl<sub>3</sub>): δ 196.4 (C), 163.7 (dd, *J* = 33.4, 30.5 Hz, C), 152.4 (C), 136.2 (C), 130.3 (CH), 129.0 (CH), 128.7 (CH), 128.32 (C), 128.29 (CH), 128.1 (C), 126.4 (CH), 116.1 (t, *J* = 261.3 Hz, C), 113.6 (CH), 63.1 (CH<sub>2</sub>), 60.4 (dd, *J* = 27.7, 23.8 Hz, CH), 42.6 (d, *J* = 3.8 Hz, CH<sub>2</sub>), 26.1 (CH<sub>2</sub> + CH<sub>3</sub>), 13.8 (CH<sub>3</sub>). <sup>19</sup>F NMR (376 MHz, CDCl<sub>3</sub>): δ -104.3 (dd, *J* = 252.9, 13.0 Hz, 1F), -108.6 (dd, *J* = 252.9, 15.9 Hz, 1F). IR (ATR): 1760, 1660, 1520, 1200, 1100, 750 cm<sup>-1</sup>. HRMS (DART): *m/z* [M+H]<sup>+</sup> Calcd for C<sub>21</sub>H<sub>22</sub>F<sub>2</sub>NO<sub>3</sub>: 374.1568; found: 374.1570.

**Ethyl 2,2-difluoro-2-(2-(4-(trifluoromethyl)phenyl)-1,2,3,4-tetrahydroisoquinolin-1-yl)acetate (3ha)**

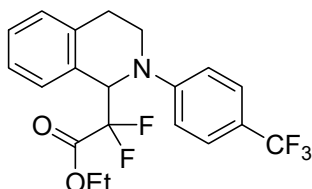

Silica gel column chromatography (hexane/AcOEt = 10/1) gave 162.1 mg (0.406 mmol, 81% yield) of the product as colorless oil. <sup>1</sup>H NMR (400 MHz, CDCl<sub>3</sub>): δ 7.48 (d, *J* = 8.7 Hz, 2H), 7.35-7.33 (m, 1H), 7.29 (d, *J* = 7.3 Hz, 1H), 7.25-7.21 (m, 1H), 7.19 (d, *J* = 7.6 Hz, 1H), 7.02 (d, *J* = 8.7 Hz, 2H), 5.40 (dd, *J* = 16.7, 12.4 Hz, 1H), 4.27-4.11 (m, 2H), 3.86-3.79 (m, 1H), 3.72-3.66 (m, 1H), 3.04-2.97 (m, 1H), 2.91 (dt, *J* = 16.5, 4.8 Hz, 1H), 1.18 (t, *J* = 7.1 Hz, 3H). <sup>13</sup>C NMR (125 MHz, CDCl<sub>3</sub>): δ 163.8 (dd, *J* = 32.4, 30.5 Hz, C), 151.4 (C), 136.2 (C), 129.0 (CH), 128.6 (CH), 128.3 (d, *J* = 3.8 Hz, CH), 128.2 (C), 126.5 (q, *J* = 3.8 Hz, CH), 126.4 (CH), 124.6 (q, *J* = 270.9 Hz, C), 120.9 (q, *J* = 32.4 Hz, C), 116.2 (dd, *J* = 262.3, 259.4 Hz, C), 114.7 (CH), 63.0 (CH<sub>2</sub>), 60.7 (dd, *J* = 27.7, 23.8 Hz, CH), 42.8 (d, *J* = 3.8 Hz, CH<sub>2</sub>), 25.7 (CH<sub>2</sub>), 13.8 (CH<sub>3</sub>). <sup>19</sup>F NMR (376 MHz, CDCl<sub>3</sub>): δ -61.4 (s, 3F), -103.7 (dd, *J* = 252.9, 12.3 Hz, 1F), -109.4 (dd, *J* = 252.9, 16.6 Hz, 1F). IR (ATR): 1770, 1520, 1160, 1110, 750, 710 cm<sup>-1</sup>. HRMS (DART): *m/z* [M+H]<sup>+</sup> Calcd for C<sub>20</sub>H<sub>19</sub>F<sub>5</sub>NO<sub>2</sub>: 400.1336; found: 400.1346.

**Ethyl 2,2-difluoro-2-(2-(4-(trifluoromethoxy)phenyl)-1,2,3,4-tetrahydroisoquinolin-1-yl)acetate (3ia)**

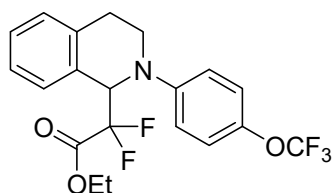

Silica gel column chromatography (hexane/AcOEt = 15/1) gave 146.2 mg (0.352 mmol, 70% yield) of the product as colorless oil.  $^1\text{H}$  NMR (400 MHz,  $\text{CDCl}_3$ ):  $\delta$  7.36 (d,  $J$  = 6.9 Hz, 1H), 7.31-7.28 (m, 1H), 7.26-7.22 (m, 1H), 7.18 (d,  $J$  = 7.3 Hz, 1H), 7.09 (d,  $J$  = 9.1 Hz, 2H), 6.93 (d,  $J$  = 9.1 Hz, 2H), 5.25 (dd,  $J$  = 18.5, 11.0 Hz, 1H), 4.25-4.11 (m, 2H), 3.82-3.74 (m, 1H), 3.63-3.57 (m, 1H), 2.99-2.91 (m, 1H), 2.79 (dt,  $J$  = 16.5, 4.1 Hz, 1H), 1.16 (t,  $J$  = 7.1 Hz, 3H).  $^{13}\text{C}$  NMR (125 MHz,  $\text{CDCl}_3$ ):  $\delta$  163.9 (dd,  $J$  = 34.3, 30.5 Hz, C), 148.1 (C), 142.3 (C), 136.4 (C), 129.1 (CH), 128.5 (CH), 128.3 (d,  $J$  = 3.8 Hz, CH), 128.2 (C), 126.3 (CH), 122.1 (CH), 120.5 (q,  $J$  = 255.6 Hz, C), 117.5 (CH), 116.3 (dd,  $J$  = 262.3, 258.5 Hz, C), 62.9 ( $\text{CH}_2$ ), 61.0 (dd,  $J$  = 27.7, 23.8 Hz, CH), 43.7 (d,  $J$  = 4.8 Hz,  $\text{CH}_2$ ), 25.2 ( $\text{CH}_2$ ), 13.8 ( $\text{CH}_3$ ).  $^{19}\text{F}$  NMR (376 MHz,  $\text{CDCl}_3$ ):  $\delta$  -58.3 (s, 3F), -102.2 (ddd,  $J$  = 263.7, 10.8, 2.9 Hz, 1F), -111.1 (dd,  $J$  = 252.9, 18.1 Hz, 1F). IR (ATR): 1770, 1510, 1250, 1150, 740  $\text{cm}^{-1}$ . HRMS (DART):  $m/z$   $[\text{M}+\text{H}]^+$  Calcd for  $\text{C}_{20}\text{H}_{19}\text{F}_5\text{NO}_3$ : 416.1285; found: 416.1289.

***tert*-Butyl 1-(2-ethoxy-1,1-difluoro-2-oxoethyl)-3,4-dihydroisoquinoline-2(1H)-carboxylate (3ja)**

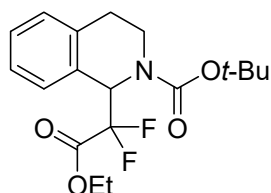

Silica gel column chromatography (hexane/AcOEt = 10/1) gave 67.8 mg (0.191 mmol, 38% yield) of the product as colorless oil. Rotamers were observed.  $^1\text{H}$  NMR (400 MHz,  $\text{CDCl}_3$ ):  $\delta$  7.35-7.27 (m, 2H), 7.23 (d,  $J$  = 7.1 Hz, 1H), 7.20-7.17 (m, 1H), 5.77-5.62 (m, 1H), 4.38-4.30 (m, 2H), 4.21-4.18 + 3.88-3.85 (m, 1H), 3.63-3.57 + 3.47-3.40 (m, 1H), 2.93-2.82 (m, 2H), 1.46 (s, 9H), 1.40-1.32 (m, 3H).  $^{13}\text{C}$  NMR (125 MHz,  $\text{CDCl}_3$ ):  $\delta$  163.5 (t,  $J$  = 32.4 Hz, C), 163.6 (t,  $J$  = 30.5 Hz, C), 155.0 (C), 154.1 (C), 136.1 (C), 129.3 (CH), 129.1 (d,  $J$  = 3.8 Hz, CH), 128.8 (CH), 128.4 (CH), 128.1 (C), 127.9 (C), 126.2 (CH), 126.1 (CH), 115.4 (t,  $J$  = 259.4 Hz, C), 115.0 (t,  $J$  = 259.4 Hz, C), 81.2 (C), 80.7 (C), 63.0 ( $\text{CH}_2$ ), 56.6 (t,  $J$  = 25.8 Hz, CH), 55.7 (dd,  $J$  = 28.6, 23.8 Hz, CH), 39.9 ( $\text{CH}_2$ ), 38.0 ( $\text{CH}_2$ ), 28.2 ( $\text{CH}_3$ ), 27.7 ( $\text{CH}_2$ ), 27.3 ( $\text{CH}_2$ ), 13.9 ( $\text{CH}_3$ ).  $^{19}\text{F}$  NMR (376 MHz,  $\text{CDCl}_3$ ):  $\delta$  -105.1 (dd,  $J$  = 258.7, 10.8 Hz, 1F), -111.6 (dd,  $J$  = 258.7, 18.8 Hz, 1F). IR (ATR): 1760, 1610, 1510, 1190, 1100, 750  $\text{cm}^{-1}$ . HRMS (DART):  $m/z$   $[\text{M}+\text{H}]^+$

Calcd for C<sub>18</sub>H<sub>24</sub>F<sub>2</sub>NO<sub>4</sub>: 356.1673; found: 356.1672.

**Ethyl 2,2-difluoro-2-(2-*p*-tolyl-1,2,3,4-tetrahydroisoquinolin-1-yl)acetate (3ka)**

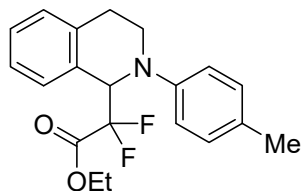

Silica gel column chromatography (hexane/AcOEt = 20/1) gave 141.4 mg (0.409 mmol, 82% yield) of the product as colorless oil. <sup>1</sup>H NMR (400 MHz, CDCl<sub>3</sub>): δ 7.39 (d, *J* = 6.6 Hz, 1H), 7.28-7.21 (m, 2H), 7.15 (d, *J* = 7.1 Hz, 1H), 7.02 (d, *J* = 8.4 Hz, 2H), 6.84 (d, *J* = 8.4 Hz, 2H), 5.20 (dd, *J* = 20.1, 10.1 Hz, 1H), 4.27-4.12 (m, 2H), 3.77-3.69 (m, 1H), 3.61-3.58 (m, 1H), 2.97-2.88 (m, 1H), 2.67 (dt, *J* = 16.5, 3.4 Hz, 1H), 2.24 (s, 3H), 1.16 (t, *J* = 7.3 Hz, 3H). <sup>13</sup>C NMR (125 MHz, CDCl<sub>3</sub>): δ 164.0 (dd, *J* = 34.3, 30.5 Hz, C), 147.2 (C), 136.7 (C), 129.8 (C), 129.6 (CH), 129.1 (CH), 128.5 (C), 128.3 (d, *J* = 4.8 Hz, CH), 128.1 (CH), 126.1 (CH), 117.6 (CH), 116.6 (dd, *J* = 263.2, 258.5 Hz, C), 62.6 (CH<sub>2</sub>), 60.8 (dd, *J* = 27.7, 22.9 Hz, CH), 43.8 (d, *J* = 4.8 Hz, CH<sub>2</sub>), 24.7 (CH<sub>2</sub>), 20.3 (CH<sub>3</sub>), 13.8 (CH<sub>3</sub>). <sup>19</sup>F NMR (376 MHz, CDCl<sub>3</sub>): δ -100.8 (ddd, *J* = 252.2, 10.1, 3.6 Hz, 1F), -112.1 (dd, *J* = 252.2, 20.2 Hz, 1F). IR (ATR): 1760, 1510, 1190, 1100, 750 cm<sup>-1</sup>. HRMS (DART): *m/z* [M+H]<sup>+</sup> Calcd for C<sub>20</sub>H<sub>22</sub>F<sub>2</sub>NO<sub>2</sub>: 346.1619; found: 346.1620.

**Ethyl 2,2-difluoro-2-(2-(4-(trimethylsilyl)phenyl)-1,2,3,4-tetrahydroisoquinolin-1-yl)acetate (3la)**

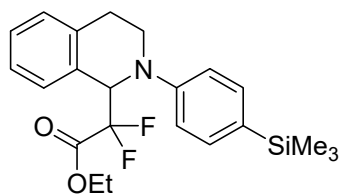

Silica gel column chromatography (hexane/AcOEt = 25/1) gave 123.2 mg (0.305 mmol, 61% yield) of the product as colorless oil. <sup>1</sup>H NMR (400 MHz, CDCl<sub>3</sub>): δ 7.39-7.34 (m, 3H), 7.28-7.19 (m, 2H), 7.15 (d, *J* = 7.3 Hz, 1H), 6.96 (d, *J* = 8.5 Hz, 2H), 5.33 (dd, *J* = 18.8, 11.2 Hz, 1H), 4.27-4.09 (m, 2H), 3.81-3.65 (m, 2H), 3.04-2.95 (m, 1H), 2.77 (dt, *J* = 16.5, 4.1 Hz, 1H), 1.17 (t, *J* = 7.1 Hz, 3H), 0.21 (s, 9H). <sup>13</sup>C NMR (125 MHz, CDCl<sub>3</sub>): δ 164.0 (dd, *J* = 33.4, 29.6 Hz, C), 149.6 (C), 136.6 (C), 134.4 (CH), 130.1 (C), 129.1 (CH), 128.6 (C), 128.30 (d, *J* = 4.8 Hz, CH), 128.26 (CH), 126.1 (CH), 116.5 (dd, *J* = 262.3, 258.5 Hz, C), 115.7 (CH), 62.8 (CH<sub>2</sub>), 60.8 (dd, *J* = 28.6, 23.8 Hz, CH), 42.7 (d, *J* = 4.8 Hz, CH<sub>2</sub>), 25.3 (CH<sub>2</sub>), 13.8 (CH<sub>3</sub>), -1.01 (CH<sub>3</sub>). <sup>19</sup>F NMR (376 MHz, CDCl<sub>3</sub>): δ -101.5 (ddd, *J* = 252.2, 10.8, 2.9 Hz, 1F), -110.5 (dd, *J* = 252.2, 18.8 Hz, 1F). IR (ATR): 1760, 1600, 1310, 1260, 1100, 850 cm<sup>-1</sup>. HRMS (DART): *m/z*

$[M+H]^+$  Calcd for  $C_{22}H_{28}F_2NO_2Si$ : 404.1857; found: 404.1844.

**Ethyl 2,2-difluoro-2-(2-(4-methoxyphenyl)-1,2,3,4-tetrahydroisoquinolin-1-yl)acetate (3ma)**

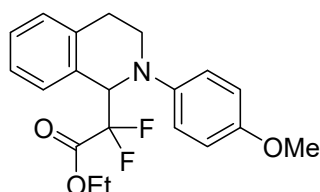

Silica gel column chromatography (hexane/AcOEt = 10/1) gave 139.5 mg (0.386 mmol, 77% yield) of the product as colorless oil.  $^1H$  NMR (400 MHz,  $CDCl_3$ ):  $\delta$  7.43-7.41 (m, 1H), 7.30-7.23 (m, 2H), 7.16 (d,  $J$  = 7.1 Hz, 1H), 6.87-6.84 (m, 2H), 6.78-6.75 (m, 2H), 5.08 (dd,  $J$  = 21.0, 9.4 Hz, 1H), 4.28-4.14 (m, 2H), 3.74 (s, 3H), 3.72-3.67 (m, 1H), 3.50-3.46 (m, 1H), 2.91-2.83 (m, 1H), 2.62 (dt,  $J$  = 16.2, 3.4 Hz, 1H), 1.16 (t,  $J$  = 7.1 Hz, 3H).  $^{13}C$  NMR (125 MHz,  $CDCl_3$ ):  $\delta$  164.0 (dd,  $J$  = 34.3, 29.6 Hz, C), 154.3 (C), 143.8 (C), 136.8 (C), 129.2 (CH), 128.5 (C), 128.3 (d,  $J$  = 5.7 Hz, CH), 128.1 (CH), 126.2 (CH), 120.3 (CH), 116.6 (dd,  $J$  = 263.2, 258.5 Hz, C), 114.4 (CH), 62.6 ( $CH_2$ ), 61.1 (dd,  $J$  = 27.7, 23.8 Hz, CH), 55.5 ( $CH_3$ ), 45.1 (d,  $J$  = 4.8 Hz,  $CH_2$ ), 24.3 ( $CH_2$ ), 13.9 ( $CH_3$ ).  $^{19}F$  NMR (376 MHz,  $CDCl_3$ ):  $\delta$  -100.6 (ddd,  $J$  = 252.1, 9.4, 3.6 Hz, 1F), -113.4 (dd,  $J$  = 252.2, 21.0 Hz, 1F). IR (ATR): 1770, 1510, 1240, 1100, 1040, 750,  $cm^{-1}$ . HRMS (DART):  $m/z$   $[M+H]^+$  Calcd for  $C_{20}H_{22}F_2NO_3$ : 362.1568; found: 362.1565.

**Ethyl 2,2-difluoro-2-(2-(3-methoxyphenyl)-1,2,3,4-tetrahydroisoquinolin-1-yl)acetate (3na)**

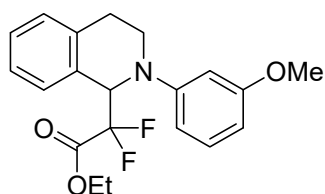

Silica gel column chromatography (hexane/AcOEt = 10/1) gave 126.1 mg (0.349 mmol, 70% yield) of the product as colorless oil.  $^1H$  NMR (400 MHz,  $CDCl_3$ ):  $\delta$  7.37 (d,  $J$  = 6.6 Hz, 1H), 7.28-7.20 (m, 2H), 7.16-7.11 (m, 2H), 6.56 (dd,  $J$  = 8.1, 2.3 Hz, 1H), 6.50 (t,  $J$  = 2.3 Hz, 1H), 6.40 (dd,  $J$  = 8.1, 2.3 Hz, 1H), 5.28 (dd,  $J$  = 19.2, 10.8 Hz, 1H), 4.28-4.12 (m, 2H), 3.77 (s, 3H), 3.78-3.71 (m, 1H), 3.67-3.62 (m, 1H), 3.01-2.93 (m, 1H), 2.74 (dt,  $J$  = 16.5, 3.9 Hz, 1H), 1.17 (t,  $J$  = 7.1 Hz, 3H).  $^{13}C$  NMR (125 MHz,  $CDCl_3$ ):  $\delta$  163.9 (dd,  $J$  = 34.3, 30.5 Hz, C), 160.5 (C), 150.6 (C), 136.6 (C), 129.8 (CH), 129.1 (CH), 128.5 (C), 128.3 (d,  $J$  = 4.8 Hz, CH), 128.2 (CH), 126.1 (CH), 116.5 (dd,  $J$  = 262.3, 258.5 Hz, C), 109.4 (CH), 104.5 (CH), 103.5 (CH), 62.8 ( $CH_2$ ), 60.9 (dd,  $J$  = 27.7, 23.8 Hz, CH), 55.1 ( $CH_3$ ), 43.2 (d,  $J$  = 4.8 Hz,  $CH_2$ ), 25.1 ( $CH_2$ ), 13.8 ( $CH_3$ ).  $^{19}F$  NMR (376 MHz,  $CDCl_3$ ):  $\delta$  -101.5 (ddd,  $J$  = 252.1, 10.8, 2.9 Hz, 1F), -111.1 (dd,  $J$

= 252.1, 19.5 Hz, 1F). IR (ATR): 1760, 1490, 1210, 1170, 1060, 730  $\text{cm}^{-1}$ . HRMS (DART):  $m/z$   $[\text{M}+\text{H}]^+$  Calcd for  $\text{C}_{20}\text{H}_{22}\text{F}_2\text{NO}_3$ : 362.1568; found: 362.1576.

**Ethyl 2,2-difluoro-2-(2-(2-methoxyphenyl)-1,2,3,4-tetrahydroisoquinolin-1-yl)acetate (3oa)**

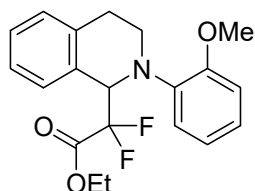

Silica gel column chromatography (hexane/AcOEt = 10/1) gave 127.9 mg (0.354 mmol, 71% yield) of the product as colorless oil.  $^1\text{H}$  NMR (400 MHz,  $\text{CDCl}_3$ ):  $\delta$  7.46-7.44 (m, 1H), 7.31-7.25 (m, 2H), 7.17 (d,  $J = 7.1$  Hz, 1H), 7.02-6.98 (m, 1H), 6.83 (d,  $J = 8.0$  Hz, 1H), 6.79-6.74 (m, 2H), 5.05 (dd,  $J = 22.9, 7.8$  Hz, 1H), 4.19-4.00 (m, 2H), 3.77 (s, 3H), 3.63-3.55 (m, 1H), 3.44-3.40 (m, 1H), 2.81-2.72 (m, 1H), 2.65-2.60 (m, 1H), 1.09 (t,  $J = 7.3$  Hz, 3H).  $^{13}\text{C}$  NMR (125 MHz,  $\text{CDCl}_3$ ):  $\delta$  164.0 (dd,  $J = 34.3, 29.6$  Hz, C), 153.3 (C), 139.3 (C), 137.2 (C), 129.3 (C), 129.1 (CH), 128.1 (d,  $J = 5.7$  Hz, CH), 127.8 (CH), 126.0 (CH), 124.2 (CH), 123.3 (CH), 120.6 (CH), 116.5 (dd,  $J = 264.2, 258.5$  Hz, C), 111.4 (CH), 82.4 ( $\text{CH}_2$ ), 61.2 (dd,  $J = 26.7, 22.9$  Hz, CH), 55.1 ( $\text{CH}_3$ ), 44.6 (d,  $J = 3.8$  Hz,  $\text{CH}_2$ ), 25.4 ( $\text{CH}_2$ ), 13.6 ( $\text{CH}_3$ ).  $^{19}\text{F}$  NMR (376 MHz,  $\text{CDCl}_3$ ):  $\delta$  -99.1 (ddd,  $J = 252.1, 7.9, 3.6$  Hz, 1F), -114.9 (dd,  $J = 252.1, 23.1$  Hz, 1F). IR (ATR): 1770, 1500, 1240, 1120, 1070, 750  $\text{cm}^{-1}$ . HRMS (DART):  $m/z$   $[\text{M}+\text{H}]^+$  Calcd for  $\text{C}_{20}\text{H}_{22}\text{F}_2\text{NO}_3$ : 362.1568; found: 362.1580.

**Ethyl 2,2-difluoro-2-(2-(4-methoxynaphthalen-1-yl)-1,2,3,4-tetrahydroisoquinolin-1-yl)acetate (3pa)**

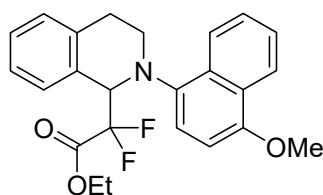

Silica gel column chromatography (hexane/AcOEt = 15/1) gave 156.7 mg (0.381 mmol, 76% yield) of the product as pale-orange solids of mp 128-129  $^\circ\text{C}$ .  $^1\text{H}$  NMR (400 MHz,  $\text{CDCl}_3$ ):  $\delta$  8.25 (d,  $J = 8.2$  Hz, 1H), 8.05 (d,  $J = 8.2$  Hz, 1H), 7.55-7.47 (m, 3H), 7.36-7.30 (m, 2H), 7.22-7.20 (m, 1H), 6.72 (d,  $J = 8.0$  Hz, 1H), 6.55 (d,  $J = 8.0$  Hz, 1H), 5.02 (dd,  $J = 23.8, 7.1$  Hz, 1H), 4.15-4.07 (m, 1H), 3.92 (s, 3H), 3.90-3.83 (m, 1H), 3.77-3.71 (m, 1H), 3.27 (dd,  $J = 14.0, 4.8$  Hz, 1H), 2.83-2.75 (m, 1H), 2.53-2.49 (m, 1H), 0.81 (t,  $J = 7.3$  Hz, 3H).  $^{13}\text{C}$  NMR (125 MHz,  $\text{CDCl}_3$ ):  $\delta$  164.1 (dd,  $J = 35.3, 29.6$  Hz, C), 152.5 (C), 140.5 (C), 137.0 (C), 130.1 (C), 129.3 (CH), 129.1 (C), 128.0 (d,  $J = 6.7$  Hz, CH), 127.9 (CH), 126.4 (CH), 126.33 (C), 126.27 (CH),

125.4 (CH), 123.1 (CH), 122.3 (CH), 118.6 (CH), 116.6 (dd,  $J = 262.3, 259.4$  Hz, C), 102.9 (CH), 62.6 (dd,  $J = 26.7, 22.9$  Hz, CH), 62.5 (CH<sub>2</sub>), 55.3 (CH<sub>3</sub>), 45.9 (d,  $J = 4.8$  Hz, CH<sub>2</sub>), 23.6 (CH<sub>2</sub>), 13.4 (CH<sub>3</sub>). <sup>19</sup>F NMR (376 MHz, CDCl<sub>3</sub>):  $\delta$  -99.2 (d,  $J = 254.3$  Hz, 1F), -116.3 (dd,  $J = 254.3, 23.1$  Hz, 1F). IR (ATR): 1750, 1590, 1270, 1090, 770, 740 cm<sup>-1</sup>. HRMS (DART):  $m/z$  [M+H]<sup>+</sup> Calcd for C<sub>24</sub>H<sub>24</sub>F<sub>2</sub>NO<sub>3</sub>: 412.1724; found: 412.1732.

### Ethyl 2-(2-benzyl-1,2,3,4-tetrahydroisoquinolin-1-yl)-2,2-difluoroacetate (3qa)

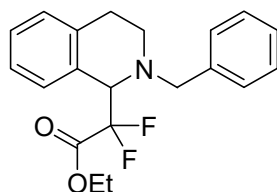

Silica gel column chromatography (hexane/AcOEt = 4/1) gave 122.7 mg (0.355 mmol, 71% yield) of the product as colorless oil. <sup>1</sup>H NMR (400 MHz, CDCl<sub>3</sub>):  $\delta$  7.34-7.27 (m, 5H), 7.25-7.21 (m, 3H), 7.18 (d,  $J = 7.3$  Hz, 1H), 4.44-4.36 (m, 1H), 4.31 (dd,  $J = 22.2, 9.2$  Hz, 1H), 4.26-4.18 (m, 1H), 3.82-3.74 (m, 2H), 3.34-3.27 (m, 1H), 2.99-2.91 (m, 1H), 2.80-2.75 (m, 1H), 2.58-2.53 (m, 1H), 1.30 (t,  $J = 7.1$  Hz, 3H). <sup>13</sup>C NMR (125 MHz, CDCl<sub>3</sub>):  $\delta$  164.3 (dd,  $J = 33.4, 30.5$  Hz, C), 138.3 (C), 136.3 (C), 129.4 (d,  $J = 4.8$  Hz, CH), 129.0 (CH), 128.7 (CH), 128.3 (CH), 127.9 (CH), 127.7 (C), 127.3 (CH), 126.0 (CH), 116.6 (dd,  $J = 261.3, 254.6$  Hz, C), 62.7 (dd,  $J = 26.7, 22.9$  Hz, CH), 62.4 (CH<sub>2</sub>), 58.6 (CH<sub>2</sub>), 42.6 (d,  $J = 5.7$  Hz, CH<sub>2</sub>), 22.4 (CH<sub>2</sub>), 13.9 (CH<sub>3</sub>). <sup>19</sup>F NMR (376 MHz, CDCl<sub>3</sub>):  $\delta$  -100.3 (ddd,  $J = 252.9, 9.4, 3.6$  Hz, 1F), -114.1 (dd,  $J = 252.9, 22.4$  Hz, 1F). IR (ATR): 1760, 1490, 1200, 1060, 750 cm<sup>-1</sup>. HRMS (DART):  $m/z$  [M+H]<sup>+</sup> Calcd for C<sub>20</sub>H<sub>22</sub>F<sub>2</sub>NO<sub>2</sub>: 346.1619; found: 346.1620.

### Ethyl 2-(6-chloro-2-(4-methoxyphenyl)-1,2,3,4-tetrahydroisoquinolin-1-yl)-2,2-difluoroacetate (3ra)

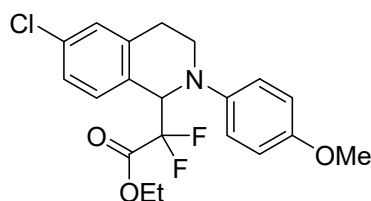

Silica gel column chromatography (hexane/AcOEt = 10/1) gave 141.1 mg (0.356 mmol, 71% yield) of the product as pale-yellow oil. <sup>1</sup>H NMR (400 MHz, CDCl<sub>3</sub>):  $\delta$  7.38-7.35 (m, 1H), 7.23 (dd,  $J = 8.2, 1.8$  Hz, 1H), 7.17 (s, 1H), 6.84-6.81 (m, 2H), 6.78-6.75 (m, 2H), 5.03 (dd,  $J = 21.3, 8.9$  Hz, 1H), 4.28-4.15 (m, 2H), 3.74 (s, 3H), 3.71-3.63 (m, 1H), 3.46 (dd,  $J = 14.2, 5.0$  Hz, 1H), 2.87-2.79 (m, 1H), 2.59-2.55 (m, 1H), 1.16 (t,  $J = 7.1$  Hz, 3H). <sup>13</sup>C NMR (125 MHz, CDCl<sub>3</sub>):  $\delta$  163.7 (dd,  $J = 34.3, 29.6$  Hz, C), 154.6 (C), 143.4 (C), 138.8 (C), 133.9 (C), 129.6 (d,  $J = 5.7$  Hz, CH), 129.1 (CH), 127.0 (C), 126.5 (CH), 120.6 (CH), 116.3 (dd,  $J = 263.2, 257.5$  Hz, C),

114.4 (CH), 62.7 (CH<sub>2</sub>), 60.7 (dd,  $J = 27.7, 23.8$  Hz, CH), 55.5 (CH<sub>3</sub>), 44.8 (d,  $J = 5.7$  Hz, CH<sub>2</sub>), 13.9 (CH<sub>3</sub>). <sup>19</sup>F NMR (376 MHz, CDCl<sub>3</sub>):  $\delta$  -100.1 (ddd,  $J = 252.9, 8.7, 2.9$  Hz, 1F), -113.7 (dd,  $J = 252.9, 21.0$  Hz, 1F). IR (ATR): 1770, 1510, 1240, 1100, 1050, 730 cm<sup>-1</sup>. HRMS (DART):  $m/z$  [M+H]<sup>+</sup> Calcd for C<sub>20</sub>H<sub>21</sub><sup>35</sup>ClF<sub>2</sub>NO<sub>3</sub>: 396.1178; found: 396.1186.

**Ethyl 2-(6,7-dimethoxy-2-(4-methoxyphenyl)-1,2,3,4-tetrahydroisoquinolin-1-yl)-2,2-difluoroacetate (3sa)**

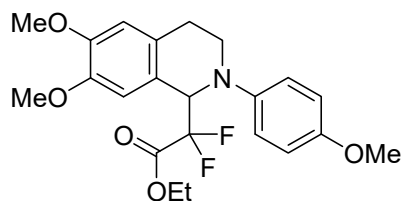

Silica gel column chromatography (hexane/AcOEt = 2/1) gave 147.8 mg (0.351 mmol, 70% yield) of the product as colorless oil. <sup>1</sup>H NMR (400 MHz, CDCl<sub>3</sub>):  $\delta$  6.91 (d,  $J = 2.7$  Hz, 1H), 6.86-6.83 (m, 2H), 6.78-6.75 (m, 2H), 6.63 (s, 1H), 4.98 (dd,  $J = 21.5, 9.2$  Hz, 1H), 4.29-4.16 (m, 2H), 3.90 (s, 3H), 3.87 (s, 3H), 3.74 (s, 3H), 3.70-3.62 (m, 1H), 3.49-3.44 (m, 1H), 2.82-2.74 (m, 1H), 2.50-2.45 (m, 1H), 1.16 (t,  $J = 7.3$  Hz, 3H). <sup>13</sup>C NMR (125 MHz, CDCl<sub>3</sub>):  $\delta$  164.0 (dd,  $J = 34.3, 29.6$  Hz, C), 154.4 (C), 148.8 (C), 147.3 (C), 143.8 (C), 129.1 (C), 120.6 (CH), 119.9 (C), 116.6 (dd,  $J = 263.2, 256.6$  Hz, C), 114.3 (CH), 111.5 (CH), 110.8 (d,  $J = 5.7$  Hz, CH), 62.5 (CH<sub>2</sub>), 60.8 (dd,  $J = 27.7, 22.9$  Hz, CH), 55.9 (CH<sub>3</sub>), 55.7 (CH<sub>3</sub>), 55.4 (CH<sub>3</sub>), 45.2 (d,  $J = 5.7$  Hz, CH<sub>2</sub>), 23.6 (CH<sub>2</sub>), 13.9 (CH<sub>3</sub>). <sup>19</sup>F NMR (376 MHz, CDCl<sub>3</sub>):  $\delta$  -99.8 (ddd,  $J = 252.2, 8.7, 2.9$  Hz, 1F), -114.2 (dd,  $J = 252.2, 21.7$  Hz, 1F). IR (ATR): 1760, 1510, 1220, 1120, 1060, 770 cm<sup>-1</sup>. HRMS (DART):  $m/z$  [M+H]<sup>+</sup> Calcd for C<sub>22</sub>H<sub>26</sub>F<sub>2</sub>NO<sub>5</sub>: 422.1779; found: 422.1772.

***tert*-Butyl 2,2-difluoro-2-(2-phenyl-1,2,3,4-tetrahydroisoquinolin-1-yl)acetate (3ab)**

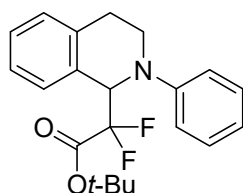

In the preparation of the organozinc reagent, the mixture was stirred for 30 min. Silica gel column chromatography (hexane/AcOEt = 20/1) gave 131.5 mg (0.366 mmol, 73% yield) of the product as white solids of mp 92-93 °C. <sup>1</sup>H NMR (400 MHz, CDCl<sub>3</sub>):  $\delta$  7.40 (d,  $J = 6.9$  Hz, 1H), 7.28-7.20 (m, 4H), 7.14 (d,  $J = 7.3$  Hz, 1H), 6.95 (d,  $J = 8.0$  Hz, 2H), 6.83 (t,  $J = 7.3$  Hz, 1H), 5.26 (dd,  $J = 19.7, 10.8$  Hz, 1H), 3.81-3.69 (m, 2H), 2.98-2.89 (m, 1H), 2.72-2.66 (m, 1H), 1.37 (s, 9H). <sup>13</sup>C NMR (125 MHz, CDCl<sub>3</sub>):  $\delta$  162.7 (dd,  $J = 33.4, 28.6$  Hz, C), 149.2 (C), 136.6 (C), 129.1 (CH), 128.8 (C), 128.4 (d,  $J = 4.8$  Hz, CH), 128.1 (CH), 126.1 (CH), 119.9 (CH),

116.7 (CH), 116.3 (dd,  $J = 262.3, 258.5$  Hz, C), 84.4 (C), 60.3 (dd,  $J = 28.6, 23.8$  Hz, CH), 43.3 (d,  $J = 4.8$  Hz, CH<sub>2</sub>), 27.6 (CH<sub>3</sub>), 24.9 (CH<sub>2</sub>). <sup>19</sup>F NMR (376 MHz, CDCl<sub>3</sub>):  $\delta$  -101.0 (ddd,  $J = 250.0, 10.8, 2.9$  Hz, 1F), -110.7 (dd,  $J = 250.0, 19.5$  Hz, 1F). IR (ATR): 1750, 1590, 1110, 1070, 750 cm<sup>-1</sup>. HRMS (DART)  $m/z$ : [M+H]<sup>+</sup> Calcd for C<sub>21</sub>H<sub>24</sub>F<sub>2</sub>NO<sub>2</sub>: 360.1775; found: 360.1791.

### Benzyl 2,2-difluoro-2-(2-phenyl-1,2,3,4-tetrahydroisoquinolin-1-yl)acetate (3ac)

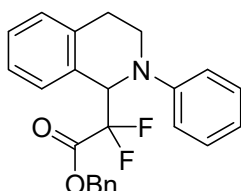

In the preparation of the organozinc reagent, the mixture was stirred for 30 min. Silica gel column chromatography (hexane/AcOEt = 20/1) gave 146.7 mg (0.373 mmol, 75% yield) of the product as colorless oil. <sup>1</sup>H NMR (400 MHz, CDCl<sub>3</sub>):  $\delta$  7.35-7.33 (m, 1H), 7.31-7.24 (m, 4H), 7.22-7.18 (m, 3H), 7.15-7.13 (m, 3H), 6.89-6.85 (m, 3H), 5.26 (dd,  $J = 19.7, 10.5$  Hz, 1H), 5.22 (d,  $J = 11.9$  Hz, 1H), 5.02 (d,  $J = 11.9$  Hz, 1H), 3.78-3.70 (m, 1H), 3.61-3.58 (m, 1H), 2.96-2.88 (m, 1H), 2.68 (dt,  $J = 16.5, 3.7$  Hz, 1H). <sup>13</sup>C NMR (125 MHz, CDCl<sub>3</sub>):  $\delta$  163.9 (dd,  $J = 34.3, 29.6$  Hz, C), 149.4 (C), 136.6 (C), 134.1 (C), 129.23 (CH), 129.16 (CH), 128.74 (CH), 128.66 (CH), 128.5 (CH), 128.4 (C), 128.3 (d,  $J = 4.8$  Hz, CH), 128.2 (CH), 126.2 (CH), 120.4 (CH), 117.4 (CH), 116.7 (dd,  $J = 263.2, 258.5$  Hz, C), 68.4 (CH<sub>2</sub>), 60.7 (dd,  $J = 27.7, 22.9$  Hz, CH), 43.6 (d,  $J = 4.8$  Hz, CH<sub>2</sub>), 24.8 (CH<sub>2</sub>). <sup>19</sup>F NMR (376 MHz, CDCl<sub>3</sub>):  $\delta$  -100.8 (ddd,  $J = 252.2, 10.8, 2.9$  Hz, 1F), -111.3 (dd,  $J = 252.2, 19.5$  Hz, 1F). IR (ATR): 1770, 1600, 1200, 1070, 740 cm<sup>-1</sup>. HRMS (DART):  $m/z$  [M+H]<sup>+</sup> Calcd for C<sub>24</sub>H<sub>22</sub>F<sub>2</sub>NO<sub>2</sub>: 394.1619; found: 394.1613.

### Phenyl 2,2-difluoro-2-(2-phenyl-1,2,3,4-tetrahydroisoquinolin-1-yl)acetate (3ad)

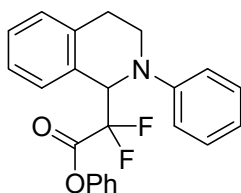

In the preparation of the organozinc reagent, the mixture was stirred for 30 min. Silica gel column chromatography (hexane/AcOEt = 20/1) gave 150.1 mg (0.396 mmol, 79% yield) of the product as white solids of mp 107-108 °C. <sup>1</sup>H NMR (400 MHz, CDCl<sub>3</sub>):  $\delta$  7.49-7.47 (m, 1H), 7.33-7.18 (m, 8H), 7.01 (d,  $J = 8.0$  Hz, 2H), 6.91-6.88 (m, 1H), 6.87-6.84 (m, 2H), 5.43 (dd,  $J = 20.1, 10.3$  Hz, 1H), 3.88-3.80 (m, 1H), 3.76-3.71 (m, 1H), 3.00-2.92 (m, 1H), 2.72 (dt,  $J = 16.5, 3.4$  Hz, 1H). <sup>13</sup>C NMR (125 MHz, CDCl<sub>3</sub>):  $\delta$  162.5 (dd,  $J = 35.3, 31.5$  Hz, C), 149.7 (C), 149.3 (C), 136.7 (C), 129.5 (CH), 129.4 (CH), 129.3 (CH), 128.4 (CH), 128.3 (CH), 128.1 (C), 126.6 (CH), 126.3 (CH), 121.1 (CH), 120.7 (CH), 117.6 (CH), 116.8 (dd,  $J = 263.2, 259.4$  Hz,



C), 60.7 (dd,  $J = 28.6, 23.8$  Hz, CH), 44.0 (d,  $J = 5.7$  Hz, CH<sub>2</sub>), 24.7 (CH<sub>2</sub>). <sup>19</sup>F NMR (376 MHz, CDCl<sub>3</sub>):  $\delta$  -100.2 (ddd,  $J = 252.2, 10.8, 3.6$  Hz, 1F), -111.0 (dd,  $J = 252.1, 20.2$  Hz, 1F). IR (ATR): 1770, 1590, 1480, 1180, 1100, 740 cm<sup>-1</sup>. HRMS (DART):  $m/z$  [M+H]<sup>+</sup> Calcd for C<sub>23</sub>H<sub>20</sub>F<sub>2</sub>NO<sub>2</sub>: 380.1462; found: 380.1455.

**S-Phenyl 2,2-difluoro-2-(2-phenyl-1,2,3,4-tetrahydroisoquinolin-1-yl)ethanethioate (3ae)**

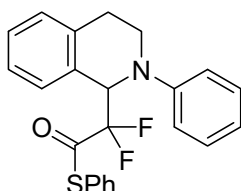

In the preparation of the organozinc reagent, the mixture was stirred for 60 min. Silica gel column chromatography (hexane/AcOEt = 15/1) gave 137.8 mg (0.348 mmol, 70% yield) of the product as white solids of mp 110-111 °C. <sup>1</sup>H NMR (400 MHz, CDCl<sub>3</sub>):  $\delta$  7.45-7.36 (m, 3H), 7.34-7.29 (m, 2H), 7.26-7.20 (m, 6H), 6.98 (d,  $J = 8.2$  Hz, 2H), 6.86 (t,  $J = 7.3$  Hz, 1H), 5.41 (dd,  $J = 18.1, 12.1$  Hz, 1H), 3.92-3.85 (m, 1H), 3.69-3.63 (m, 1H), 3.05-2.98 (m, 1H), 2.91 (dt,  $J = 16.2, 4.8$  Hz, 1H). <sup>13</sup>C NMR (125 MHz, CDCl<sub>3</sub>):  $\delta$  192.1 (dd,  $J = 35.3, 31.5$  Hz, C), 149.2 (C), 136.9 (C), 134.6 (CH), 130.0 (CH), 129.4 (CH), 129.2 (CH), 128.9 (CH), 128.7 (C), 128.6 (d,  $J = 3.8$  Hz, CH), 128.4 (CH), 126.2 (CH), 124.9 (C), 119.7 (CH), 118.3 (dd,  $J = 266.1, 264.2$  Hz, C), 116.0 (CH), 60.7 (dd,  $J = 26.7, 22.9$  Hz, CH), 43.5 (d,  $J = 3.8$  Hz, CH<sub>2</sub>), 25.7 (CH<sub>2</sub>). <sup>19</sup>F NMR (376 MHz, CDCl<sub>3</sub>):  $\delta$  -100.6 (ddd,  $J = 251.4, 11.6, 2.2$  Hz, 1F), -109.1 (dd,  $J = 251.4, 18.1$  Hz, 1F). IR (ATR): 1700, 1500, 1190, 1070, 740 cm<sup>-1</sup>. HRMS (DART):  $m/z$  [M+H]<sup>+</sup> Calcd for C<sub>23</sub>H<sub>20</sub>F<sub>2</sub>NOS: 396.1234; found: 396.1245.

**N,N-Diethyl-2,2-difluoro-2-(2-phenyl-1,2,3,4-tetrahydroisoquinolin-1-yl)acetamide<sup>14</sup> (3af)**

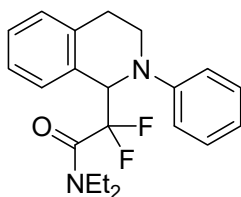

In the preparation of the organozinc reagent, the mixture was stirred for 60 min. Silica gel column chromatography (hexane/AcOEt = 10/1) gave 127.8 mg (0.357 mmol, 71% yield) of the product as white solid of mp 87-88 °C. <sup>1</sup>H NMR (400 MHz, CDCl<sub>3</sub>):  $\delta$  7.33 (d,  $J = 7.6$  Hz, 1H), 7.28-7.24 (m, 3H), 7.21-7.16 (m, 2H), 7.02 (d,  $J = 8.2$  Hz, 2H), 6.81 (t,  $J = 7.3$  Hz, 1H), 5.67 (dd,  $J = 17.8, 10.5$  Hz, 1H), 3.88-3.82 (m, 1H), 3.49-3.32 (m, 2H), 3.31-3.15 (m, 2H), 3.13-2.95 (m, 3H), 1.06 (t,  $J = 7.1$  Hz, 3H), 1.02 (t,  $J = 7.1$  Hz, 3H). <sup>13</sup>C NMR (125 MHz, CDCl<sub>3</sub>):  $\delta$  163.3 (t,  $J = 27.7$  Hz, C), 149.4 (C), 137.0 (C), 129.9 (d,  $J = 2.9$  Hz, C), 129.0 (CH), 128.8 (d,  $J = 1.9$  Hz, CH), 128.1 (CH), 126.0 (CH), 118.8 (t,  $J = 263.2$  Hz, C), 118.4 (CH), 114.3

(CH), 61.1 (dd,  $J = 24.8, 22.9$  Hz, CH), 43.9 (CH<sub>2</sub>), 42.4 (CH<sub>2</sub>), 41.8 (dd,  $J = 9.5, 4.8$  Hz, CH<sub>2</sub>), 27.2 (d,  $J = 2.9$  Hz, CH<sub>2</sub>), 14.3 (CH<sub>3</sub>), 11.8 (CH<sub>3</sub>). <sup>19</sup>F NMR (376 MHz, CDCl<sub>3</sub>):  $\delta$  -100.7 (dd,  $J = 255.8, 10.8$  Hz, 1F), -104.3 (dd,  $J = 255.8, 18.1$  Hz, 1F). IR (ATR): 1650, 1500, 1130, 1050, 740 cm<sup>-1</sup>. HRMS (DART):  $m/z$  [M+H]<sup>+</sup> Calcd for C<sub>21</sub>H<sub>25</sub>F<sub>2</sub>N<sub>2</sub>O: 359.1935; found: 359.1941.

### 2,2-Difluoro-2-(2-phenyl-1,2,3,4-tetrahydroisoquinolin-1-yl)-*N*-propylacetamide (3ag)

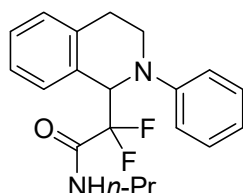

In the preparation of the organozinc reagent, the mixture was stirred for 60 min. Silica gel column chromatography (hexane/AcOEt = 5/1) gave 109.2 mg (0.317 mmol, 63% yield) of the product as white solids of mp 101-102 °C. <sup>1</sup>H NMR (400 MHz, CDCl<sub>3</sub>):  $\delta$  7.30-7.24 (m, 4H), 7.20-7.16 (m, 2H), 7.05 (d,  $J = 8.2$  Hz, 2H), 6.82 (t,  $J = 7.3$  Hz, 1H), 6.22 (brs, 1H), 5.56 (dd,  $J = 17.4, 12.6$  Hz, 1H), 3.83-3.77 (m, 1H), 3.56-3.50 (m, 1H), 3.24-3.19 (m, 2H), 3.02-2.99 (m, 2H), 1.50-1.41 (m, 2H), 0.83 (t,  $J = 7.6$  Hz, 3H). <sup>13</sup>C NMR (125 MHz, CDCl<sub>3</sub>):  $\delta$  164.0 (t,  $J = 27.7$  Hz, C), 149.6 (C), 136.9 (C), 129.4 (d,  $J = 2.9$  Hz, C), 129.1 (CH), 128.7 (d,  $J = 2.9$  Hz, CH), 128.5 (CH), 128.1 (CH), 126.1 (CH), 118.9 (CH), 117.9 (t,  $J = 261.3$  Hz, C), 114.9 (CH), 60.4 (dd,  $J = 24.8, 22.9$  Hz, CH), 43.5 (d,  $J = 1.9$  Hz, CH<sub>2</sub>), 41.2 (CH<sub>2</sub>), 26.7 (d,  $J = 2.9$  Hz, CH<sub>2</sub>), 22.2 (CH<sub>2</sub>), 11.1 (CH<sub>3</sub>). <sup>19</sup>F NMR (376 MHz, CDCl<sub>3</sub>):  $\delta$  -108.8 (dd,  $J = 250.0, 12.3$  Hz, 1F), -110.9 (dd,  $J = 250.0, 17.3$  Hz, 1F). IR (ATR): 3320, 1680, 1500, 1190, 1040, 760 cm<sup>-1</sup>. HRMS (DART):  $m/z$  [M+H]<sup>+</sup> Calcd for C<sub>20</sub>H<sub>23</sub>F<sub>2</sub>N<sub>2</sub>O: 345.1778; found: 345.1784.

### Ethyl 2,2-difluoro-2-(isochroman-1-yl)acetate (5aa)

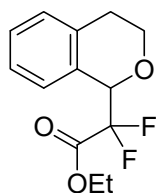

Silica gel column chromatography (hexane/AcOEt = 10/1) gave 92.6 mg (0.361 mmol, 72% yield) of the product as colorless oil. <sup>1</sup>H NMR (400 MHz, CDCl<sub>3</sub>):  $\delta$  7.35 (d,  $J = 7.1$  Hz, 1H), 7.31-7.23 (m, 2H), 7.18 (d,  $J = 7.3$  Hz, 1H), 5.26 (dd,  $J = 21.0, 4.8$  Hz, 1H), 4.45-4.33 (m, 1H), 4.19-4.14 (m, 1H), 3.85-3.79 (m, 1H), 2.93-2.86 (m, 1H), 2.81 (dt,  $J = 16.2, 5.3$  Hz, 1H), 1.37 (t,  $J = 7.1$  Hz, 3H). <sup>13</sup>C NMR (125 MHz, CDCl<sub>3</sub>):  $\delta$  163.5 (dd,  $J = 33.4, 29.6$  Hz, C), 135.3 (C), 128.8 (CH), 128.2 (C), 128.0 (CH), 126.7 (d,  $J = 5.7$  Hz, CH), 126.3 (CH), 114.9 (dd,  $J = 263.2, 253.7$  Hz, C), 74.2 (dd,  $J = 28.6, 24.8$  Hz, CH), 63.0 (CH<sub>2</sub>), 62.9 (d,  $J = 1.9$  Hz, CH<sub>2</sub>), 28.5 (CH<sub>2</sub>), 13.9 (CH<sub>3</sub>). <sup>19</sup>F NMR (376 MHz, CDCl<sub>3</sub>):  $\delta$  -106.7 (dt,  $J = 257.2, 4.3$  Hz, 1F), -119.2

(dd,  $J = 257.2, 21.0$  Hz, 1F). IR (ATR): 1760, 1190, 1110, 1070, 750  $\text{cm}^{-1}$ . HRMS (DART):  $m/z$   $[\text{M}+\text{H}]^+$  Calcd for  $\text{C}_{13}\text{H}_{15}\text{F}_2\text{O}_3$ : 257.0989; found: 257.0994.

#### Ethyl 2,2-difluoro-2-(6-methylisochroman-1-yl)acetate (5ba)

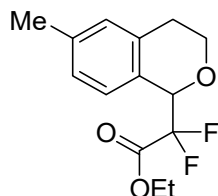

Silica gel column chromatography (hexane/AcOEt = 10/1) gave 92.1 mg (0.341 mmol, 68% yield) of the product as colorless oil.  $^1\text{H}$  NMR (400 MHz,  $\text{CDCl}_3$ ):  $\delta$  7.15 (s, 1H), 7.11 (d,  $J = 8.0$  Hz, 1H), 7.07 (d,  $J = 8.0$  Hz, 1H), 5.21 (dd,  $J = 21.0, 4.8$  Hz, 1H), 4.45-4.33 (m, 2H), 4.17-4.12 (m, 1H), 3.82-3.77 (m, 1H), 2.88-2.72 (m, 2H), 2.34 (s, 3H), 1.37 (t,  $J = 7.1$  Hz, 3H).  $^{13}\text{C}$  NMR (125 MHz,  $\text{CDCl}_3$ ):  $\delta$  163.6 (dd,  $J = 33.4, 29.6$  Hz, C), 135.9 (C), 132.2 (C), 128.9 (CH), 128.6 (CH), 128.0 (C), 127.1 (d,  $J = 5.7$  Hz, CH), 115.0 (dd,  $J = 262.3, 254.6$  Hz, C), 74.2 (dd,  $J = 27.7, 23.8$  Hz, CH), 63.0 (d,  $J = 1.9$  Hz,  $\text{CH}_2$ ), 62.9 ( $\text{CH}_2$ ), 28.1 ( $\text{CH}_2$ ), 21.2 ( $\text{CH}_3$ ), 14.0 ( $\text{CH}_3$ ).  $^{19}\text{F}$  NMR (376 MHz,  $\text{CDCl}_3$ ):  $\delta$  -106.6 (dt,  $J = 256.5, 4.3$  Hz, 1F), -119.2 (dd,  $J = 256.5, 21.0$  Hz, 1F). IR (ATR): 1770, 1500, 1100, 1070, 750  $\text{cm}^{-1}$ . HRMS (DART):  $m/z$   $[\text{M}+\text{H}]^+$  Calcd for  $\text{C}_{14}\text{H}_{17}\text{F}_2\text{O}_3$ : 271.1146; found: 271.1150.

#### Ethyl 2,2-difluoro-2-(6-methoxyisochroman-1-yl)acetate (5ca)

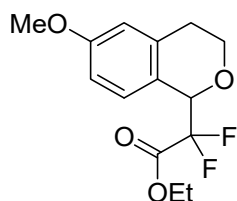

Silica gel column chromatography (hexane/AcOEt = 10/1) gave 95.1 mg (0.332 mmol, 66% yield) of the product as colorless oil.  $^1\text{H}$  NMR (400 MHz,  $\text{CDCl}_3$ ):  $\delta$  7.28-7.25 (m, 1H), 6.81 (dd,  $J = 8.7, 2.4$  Hz, 1H), 6.71 (d,  $J = 2.4$  Hz, 1H), 5.21 (dd,  $J = 20.8, 5.0$  Hz, 1H), 4.44-4.33 (m, 2H), 4.17-4.11 (m, 1H), 3.81 (s, 3H), 3.80-3.76 (m, 1H), 2.90-2.83 (m, 1H), 2.77 (dt,  $J = 16.5, 5.0$  Hz, 1H), 1.37 (t,  $J = 7.1$  Hz, 3H).  $^{13}\text{C}$  NMR (125 MHz,  $\text{CDCl}_3$ ):  $\delta$  163.6 (dd,  $J = 34.3, 29.6$  Hz, C), 159.2 (C), 136.8 (C), 127.9 (d,  $J = 5.7$  Hz, CH), 120.2 (C), 114.9 (dd,  $J = 262.3, 252.7$  Hz, C), 113.5 (CH), 112.6 (CH), 74.0 (dd,  $J = 27.7, 23.8$  Hz, CH), 62.9 ( $\text{CH}_2$ ), 62.6 (d,  $J = 1.9$  Hz,  $\text{CH}_2$ ), 55.2 ( $\text{CH}_3$ ), 28.8 ( $\text{CH}_2$ ), 13.9 ( $\text{CH}_3$ ).  $^{19}\text{F}$  NMR (376 MHz,  $\text{CDCl}_3$ ):  $\delta$  -107.0 (dt,  $J = 256.5, 5.1$  Hz, 1F), -119.6 (dd,  $J = 256.5, 21.0$  Hz, 1F). IR (ATR): 1770, 1610, 1500, 1250, 1100, 1070, 700  $\text{cm}^{-1}$ . HRMS (DART):  $m/z$   $[\text{M}+\text{H}]^+$  Calcd for  $\text{C}_{14}\text{H}_{17}\text{F}_2\text{O}_4$ : 287.1095; found: 287.1089.

### Ethyl 2,2-difluoro-2-(6-fluoroisochroman-1-yl)acetate (5da)

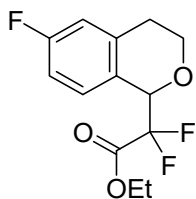

Silica gel column chromatography (hexane/AcOEt = 10/1) gave 95.8 mg (0.349 mmol, 70% yield) of the product as colorless oil.  $^1\text{H}$  NMR (400 MHz,  $\text{CDCl}_3$ ):  $\delta$  7.35-7.30 (m, 1H), 6.98-6.94 (m, 1H), 6.90 (dd,  $J=9.2, 2.3$  Hz, 1H), 5.23 (dd,  $J=21.0, 4.8$  Hz, 1H), 4.45-4.33 (m, 2H), 4.17-4.12 (m, 1H), 3.83-3.77 (m, 1H), 2.92-2.85 (m, 1H), 2.83-2.76 (m, 1H), 1.37 (t,  $J=7.3$  Hz, 3H).  $^{13}\text{C}$  NMR (125 MHz,  $\text{CDCl}_3$ ):  $\delta$  163.4 (dd,  $J=33.4, 29.6$  Hz, C), 162.2 (d,  $J=248.0$  Hz, C), 137.7 (d,  $J=7.6$  Hz, C), 128.5 (dd,  $J=8.6, 6.7$  Hz, CH), 123.9 (d,  $J=3.1$  Hz, C), 115.4 (d,  $J=21.9$  Hz, CH), 114.8 (dd,  $J=263.2, 253.7$  Hz, C), 113.8 (CH), 73.9 (dd,  $J=28.6, 24.8$  Hz, CH), 63.0 ( $\text{CH}_2$ ), 62.4 (d,  $J=1.9$  Hz,  $\text{CH}_2$ ), 28.5 ( $\text{CH}_2$ ), 14.0 ( $\text{CH}_3$ ).  $^{19}\text{F}$  NMR (376 MHz,  $\text{CDCl}_3$ ):  $\delta$  -106.7 (dt,  $J=257.9, 3.6$  Hz, 1F), -113.8 (s, 1F), -119.3 (dd,  $J=257.9, 21.0$  Hz, 1F). IR (ATR): 1770, 1500, 1230, 1100, 1070, 730  $\text{cm}^{-1}$ . HRMS (DART):  $m/z$   $[\text{M}+\text{H}]^+$  Calcd for  $\text{C}_{13}\text{H}_{14}\text{F}_3\text{O}_3$ : 275.0895; found: 275.0893.

### Ethyl 2-(6-chloroisochroman-1-yl)-2,2-difluoroacetate (5ea)

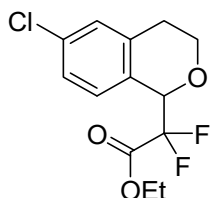

Silica gel column chromatography (hexane/AcOEt = 8/1) gave 98.8 mg (0.340 mmol, 68% yield) of the product as colorless oil.  $^1\text{H}$  NMR (400 MHz,  $\text{CDCl}_3$ ):  $\delta$  7.30-7.28 (m, 1H), 7.24-7.22 (m, 1H), 7.19 (s, 1H), 5.22 (dd,  $J=21.0, 4.8$  Hz, 1H), 4.45-4.33 (m, 2H), 4.17-4.12 (m, 1H), 3.83-3.77 (m, 1H), 2.90-2.75 (m, 2H), 1.37 (t,  $J=7.1$  Hz, 3H).  $^{13}\text{C}$  NMR (125 MHz,  $\text{CDCl}_3$ ):  $\delta$  163.2 (dd,  $J=33.4, 29.6$  Hz, C), 137.2 (C), 133.9 (C), 128.7 (CH), 128.0 (d,  $J=6.7$  Hz, CH), 126.73 (C), 126.66 (CH), 114.7 (dd,  $J=263.2, 254.6$  Hz, C), 73.9 (dd,  $J=28.6, 24.8$  Hz, CH), 63.0 ( $\text{CH}_2$ ), 62.4 (d,  $J=1.9$  Hz,  $\text{CH}_2$ ), 28.3 ( $\text{CH}_2$ ), 13.9 ( $\text{CH}_3$ ).  $^{19}\text{F}$  NMR (376 MHz,  $\text{CDCl}_3$ )  $\delta$  -106.6 (dt,  $J=257.9, 2.9$  Hz, 1F), -119.2 (dd,  $J=257.9, 21.0$  Hz, 1F). IR (ATR): 1760, 1490, 1190, 1110, 1070, 720  $\text{cm}^{-1}$ . HRMS (DART):  $m/z$   $[\text{M}+\text{H}]^+$  Calcd for  $\text{C}_{13}\text{H}_{14}^{35}\text{ClF}_2\text{O}_3$ : 291.0600; found: 291.0594.

### Ethyl 2,2-difluoro-2-(8-methylisochroman-1-yl)acetate (5fa)

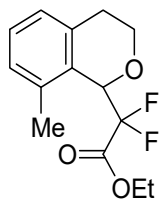

Silica gel column chromatography (hexane/AcOEt = 10/1) gave 95.3 mg (0.353 mmol, 71% yield) of the product as colorless oil.  $^1\text{H}$  NMR (400 MHz,  $\text{CDCl}_3$ ):  $\delta$  7.23-7.20 (m, 1H), 7.18-7.16 (m, 2H), 5.23 (dd,  $J = 21.3, 5.3$  Hz, 1H), 4.45-4.33 (m, 2H), 4.22-4.16 (m, 1H), 3.90-3.84 (m, 1H), 2.72 (t,  $J = 5.7$  Hz, 2H), 2.27 (s, 3H), 1.37 (t,  $J = 7.1$  Hz, 3H).  $^{13}\text{C}$  NMR (125 MHz,  $\text{CDCl}_3$ ):  $\delta$  163.6 (dd,  $J = 33.4, 29.6$  Hz, C), 136.2 (C), 133.6 (C), 129.5 (CH), 128.0 (C), 125.8 (CH), 124.2 (d,  $J = 5.7$  Hz, CH), 115.1 (dd,  $J = 263.2, 254.6$  Hz, C), 74.3 (dd,  $J = 28.6, 24.8$  Hz, CH), 62.9 ( $\text{CH}_2$ ), 62.6 (d,  $J = 1.9$  Hz,  $\text{CH}_2$ ), 25.6 ( $\text{CH}_2$ ), 19.0 ( $\text{CH}_3$ ), 14.0 ( $\text{CH}_3$ ).  $^{19}\text{F}$  NMR (376 MHz,  $\text{CDCl}_3$ ):  $\delta$  -105.9 (dt,  $J = 256.5, 5.1$  Hz, 1F), -118.2 (dd,  $J = 256.5, 21.0$  Hz, 1F). IR (ATR): 1770, 1500, 1100, 1070, 750  $\text{cm}^{-1}$ . HRMS (DART):  $m/z$   $[\text{M}+\text{H}]^+$  Calcd for  $\text{C}_{14}\text{H}_{17}\text{F}_2\text{O}_3$ : 271.1146; found: 271.1151.

### *N,N*-Diethyl-2,2-difluoro-2-(isochroman-1-yl)acetamide (5af)

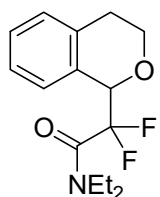

Silica gel column chromatography (hexane/AcOEt = 4/1) gave 86.2 mg (0.304 mmol, 61% yield) of the product as colorless oil.  $^1\text{H}$  NMR (400 MHz,  $\text{CDCl}_3$ ):  $\delta$  7.37 (d,  $J = 7.1$  Hz, 1H), 7.29-7.22 (m, 2H), 7.17 (d,  $J = 7.1$  Hz, 1H), 5.45 (dd,  $J = 19.2, 6.2$  Hz, 1H), 4.23-4.18 (m, 1H), 3.77 (dt,  $J = 10.5, 3.4$  Hz, 1H), 3.56-3.36 (m, 4H), 3.02-2.94 (m, 1H), 2.72 (dt,  $J = 16.0, 3.4$  Hz, 1H), 1.19 (t,  $J = 6.9$  Hz, 3H), 1.18 (t,  $J = 6.9$  Hz, 3H).  $^{13}\text{C}$  NMR (125 MHz,  $\text{CDCl}_3$ ):  $\delta$  162.7 (t,  $J = 27.7$  Hz, C), 135.8 (C), 129.3 (d,  $J = 1.9$  Hz, C), 128.6 (CH), 127.7 (CH), 127.1 (d,  $J = 5.7$  Hz, CH), 126.2 (CH), 117.1 (dd,  $J = 266.1, 253.7$  Hz, C), 75.0 (dd,  $J = 27.7, 24.8$  Hz, CH), 63.5 ( $\text{CH}_2$ ), 42.3 ( $\text{CH}_2$ ), 42.2 (dd,  $J = 9.5, 3.8$  Hz,  $\text{CH}_2$ ), 29.1 ( $\text{CH}_2$ ), 14.6 ( $\text{CH}_3$ ), 12.3 ( $\text{CH}_3$ ).  $^{19}\text{F}$  NMR (376 MHz,  $\text{CDCl}_3$ ):  $\delta$  102.1 (d,  $J = 263.0$  Hz, 1F), 113.1 (dd,  $J = 263.0, 18.8$  Hz, 1F). IR (ATR): 1650, 1190, 1110, 750  $\text{cm}^{-1}$ . HRMS (DART):  $m/z$   $[\text{M}+\text{H}]^+$  Calcd for  $\text{C}_{15}\text{H}_{20}\text{F}_2\text{NO}_2$ : 284.1462; found: 284.1455.

## 2.5. Gram-scale experiment

The reaction was carried out in a two-necked flask-type undivided cell equipped with a graphite anode (1 x 5 cm<sup>2</sup>) and a platinum cathode (1 x 2 cm<sup>2</sup>) (distance between the anode and cathode: 1 cm). After the reaction vessel was charged with 2-phenyl-1,2,3,4-tetrahydroisoquinoline (**1a**) (1.05 g, 5 mmol) and Et<sub>4</sub>NBr (210 mg, 1 mmol), dry MeCN (40 mL) and CF<sub>3</sub>CH<sub>2</sub>OH (2.00 g, 20 mmol) were added. Then, a constant current (5 mA, 2.7 F/mol) was supplied at 0 °C with magnetic stirring. To the undivided cell was added the organozinc reagent (11.3 mL, 0.78 M in THF) prepared through stirring the mixture of Zn powder (1.18 g, 18 mmol) and ethyl 2-bromo-2,2-difluoroacetate (4.06 g, 20 mmol) in dry THF (20 mL) at rt for 5 min.<sup>13</sup> The reaction mixture was stirred at rt for 6 h. Water was added, and then the resulting mixture was extracted with AcOEt. The combined organic layers were dried over Na<sub>2</sub>SO<sub>4</sub>. Concentration and purification through silica gel column chromatography (hexane/AcOEt = 20/1) gave 1.253 g (3.78 mmol, 76% yield) of the desired product **3aa** as colorless oil.

## 2.6. Synthesis of compound 6

### 2.6.1. CAN oxidation<sup>15</sup> for **3pa**

Ammonium cerium(IV) nitrate (411.2 mg, 0.75 mmol) in H<sub>2</sub>O (2.5 mL) was added to the solution of ethyl 2,2-difluoro-2-(2-(4-methoxynaphthalen-1-yl)-1,2,3,4-tetrahydroisoquinolin-1-yl)acetate (**3pa**) (102.9 mg, 0.25 mmol) in MeCN (7.5 mL). After stirring at 0 °C for 1 h, NaBH<sub>4</sub> (47.3 mg, 1.25 mmol) was added at 0 °C. The mixture was stirred at 0 °C for 30 min, and water was added. The resulting mixture was filtered through celite, and the celite pad was washed with MeCN and toluene. After the filtrate was extracted with AcOEt, the combined organic layers were dried over Na<sub>2</sub>SO<sub>4</sub>. Concentration and purification through silica gel column chromatography (hexane/AcOEt = 3/1) gave 47.2 mg (0.185 mmol, 74% yield) of the desired product **6**.

### 2.6.2. Pd/C-catalyzed reduction for **3qa**

To ethyl 2-(2-benzyl-1,2,3,4-tetrahydroisoquinolin-1-yl)-2,2-difluoroacetate (**3qa**) (86.3 mg, 0.25 mmol) in EtOH (4.7 mL) was added Pd/C (23.4 mg, 10% w/w). After stirring under a hydrogen atmosphere at rt for 12 h, the reaction mixture was filtered. Concentration and purification through silica gel column chromatography (hexane/AcOEt = 3/1) gave 62.1 mg (0.243 mmol, 97 % yield) of the desired product **6**.

## Ethyl 2,2-difluoro-2-(1,2,3,4-tetrahydroisoquinolin-1-yl)acetate (**6**)

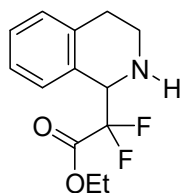

Pale yellow oil.  $^1\text{H}$  NMR (400 MHz,  $\text{CDCl}_3$ ):  $\delta$  7.34 (d,  $J = 7.3$  Hz, 1H), 7.25-7.18 (m, 2H), 7.15 (d,  $J = 7.3$  Hz, 1H), 4.58 (dd,  $J = 20.4, 8.5$  Hz, 1H), 4.40-4.28 (m, 2H), 3.26-3.18 (m, 1H), 3.05-2.99 (m, 1H), 2.81-2.69 (m, 2H), 1.76 (brs, 1H), 1.32 (t,  $J = 7.1$  Hz, 3H).  $^{13}\text{C}$  NMR (125 MHz,  $\text{CDCl}_3$ ):  $\delta$  164.3 (dd,  $J = 33.4, 31.5$  Hz, C), 136.9 (C), 129.33 (C), 129.25 (CH), 128.2 (d,  $J = 4.8$  Hz, CH), 127.7 (CH), 125.9 (CH), 116.8 (dd,  $J = 261.3, 254.6$  Hz, C), 62.6 ( $\text{CH}_2$ ), 56.5 (dd,  $J = 24.8, 22.9$  Hz, CH), 39.6 (d,  $J = 1.9$  Hz,  $\text{CH}_2$ ), 29.1 ( $\text{CH}_2$ ), 13.9 ( $\text{CH}_3$ ).  $^{19}\text{F}$  NMR (376 MHz,  $\text{CDCl}_3$ ):  $\delta$  -102.7 (ddd,  $J = 255.8, 8.8, 2.9$  Hz, 1F), -114.5 (dd,  $J = 255.8, 20.2$  Hz, 1F). IR (ATR): 3360, 1770, 1190, 1070, 750  $\text{cm}^{-1}$ . HRMS (DART):  $m/z$   $[\text{M}+\text{H}]^+$  Calcd for  $\text{C}_{13}\text{H}_{16}\text{F}_2\text{NO}_2$ : 256.1149; found: 256.1148.

## 2.7. Synthesis of substrates

### 2-(4-(Trimethylsilyl)phenyl)-1,2,3,4-tetrahydroisoquinoline (**11**)

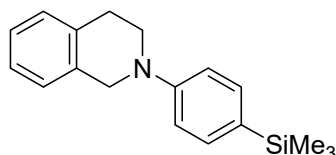

To the solution of 2-(4-bromophenyl)-1,2,3,4-tetrahydroisoquinoline (**1d**) (720.5 mg, 2.5 mmol) in dry THF (10 mL) was added *n*-BuLi (2.0 M in cyclohexane, 1.88 mL, 3.76 mmol) dropwise at  $-78$   $^{\circ}\text{C}$ . The mixture was stirred at  $-78$   $^{\circ}\text{C}$  for 2 h. Then, TMSCl (353.1 mg, 3.25 mmol) was added dropwise at  $-78$   $^{\circ}\text{C}$ . The reaction mixture was gradually warmed to rt and stirred at rt for 6 h. Water was added, and then the resulting mixture was extracted with AcOEt. The combined organic layers were dried over  $\text{Na}_2\text{SO}_4$ . Concentration and purification through silica gel column chromatography (hexane/AcOEt = 20/1) gave 502.3 mg (1.78 mmol, 71% yield) of the desired product as colorless oil.  $^1\text{H}$  NMR (400 MHz,  $\text{CDCl}_3$ ):  $\delta$  7.44 (d,  $J = 8.1$  Hz, 2H), 7.19-7.15 (m, 4H), 6.97 (d,  $J = 8.1$  Hz, 2H), 4.44 (s, 2H), 3.59 (t,  $J = 5.7$  Hz, 2H), 2.98 (t,  $J = 5.7$  Hz, 2H), 0.24 (s, 9H).  $^{13}\text{C}$  NMR (125 MHz,  $\text{CDCl}_3$ ):  $\delta$  150.7 (C), 135.0 (C), 134.5 (CH), 134.4 (C), 128.4 (CH), 128.0 (C), 126.5 (CH), 126.3 (CH), 126.0 (CH), 114.0 (CH), 50.1 ( $\text{CH}_2$ ), 45.8 ( $\text{CH}_2$ ), 29.1 ( $\text{CH}_2$ ), -0.90 ( $\text{CH}_3$ ). IR (ATR): 1590, 1380, 1240, 1110, 830  $\text{cm}^{-1}$ . HRMS (DART):  $m/z$   $[\text{M}+\text{H}]^+$  Calcd for  $\text{C}_{18}\text{H}_{24}\text{NSi}$ : 282.1678; found: 282.1686.

### 2-(4-Methoxynaphthalen-1-yl)-1,2,3,4-tetrahydroisoquinoline (1p)

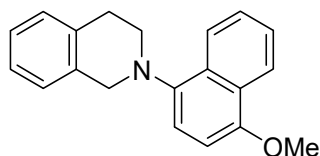

A reaction tube was charged with BINAP (171.2 mg, 0.275 mmol) and Pd(OAc)<sub>2</sub> (56.1 mg, 0.25 mmol), and toluene (12.5 mL) was added. Then, 1-bromo-4-methoxynaphthalene (1186 mg, 5.0 mmol), 1,2,3,4-tetrahydroisoquinoline (799.1 mg, 6.0 mmol), and *t*-BuOK (785.5 mg, 7.0 mmol) was added, and the reaction mixture was stirred at 100 °C for 4 h. Water was added, and then the resulting mixture was extracted with AcOEt. The combined organic layers were dried over Na<sub>2</sub>SO<sub>4</sub>. Concentration and purification through silica gel column chromatography (hexane/AcOEt = 20/1) gave 954.9 mg (3.30 mmol, 66% yield) of the desired product as white solids of mp 112-113 °C. <sup>1</sup>H NMR (500 MHz, CDCl<sub>3</sub>): δ 8.28-8.25 (m, 2H), 7.52-7.47 (m, 2H), 7.22-7.17 (m, 3H), 7.12-7.09 (m, 2H), 6.76 (d, *J* = 8.3 Hz, 1H), 4.25 (s, 2H), 3.99 (s, 3H), 3.66-2.76 (m, 4H). <sup>13</sup>C NMR (125 MHz, CDCl<sub>3</sub>): δ 152.0 (C), 142.8 (C), 135.6 (C), 134.5 (C), 130.2 (C), 129.0 (CH), 126.5 (C), 126.4 (CH), 126.2 (CH), 126.1 (CH), 125.7 (CH), 125.3 (CH), 123.4 (CH), 122.3 (CH), 115.0 (CH), 103.3 (CH), 55.8 (CH<sub>2</sub>), 55.5 (CH<sub>3</sub>), 51.6 (CH<sub>2</sub>), 29.8 (CH<sub>2</sub>). IR (ATR): 1590, 1260, 1090, 1020, 810 cm<sup>-1</sup>. HRMS (DART) *m/z*: [M+H]<sup>+</sup> Calcd for C<sub>20</sub>H<sub>20</sub>NO: 290.1545; found: 290.1546.

### 6-Chloro-2-(4-methoxyphenyl)-1,2,3,4-tetrahydroisoquinoline (1r)

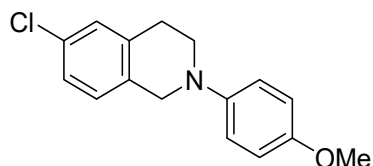

After a flask was charged with 6-chloro-3,4-dihydroisoquinolin-1(2*H*)-one<sup>16</sup> (908.1 mg, 5.0 mmol), 4-iodoanisole (1755 mg, 7.5 mmol), CuI (95.2 mg, 0.5 mmol), and K<sub>3</sub>PO<sub>4</sub> (2123 mg, 10 mmol), toluene (5.0 mL) was added. Then, dipivaloylmethane (92.1 mg, 0.5 mmol) was added, and the reaction mixture was refluxed for 24 h. Water was added at rt, and then the resulting mixture was extracted with AcOEt. The combined organic layers were dried over Na<sub>2</sub>SO<sub>4</sub>. Concentration and purification through silica gel column chromatography (hexane/AcOEt = 4/1) gave 951.2 mg (3.31 mmol, 66% yield) of 6-chloro-2-(4-methoxyphenyl)-3,4-dihydroisoquinolin-1(2*H*)-one as colorless oil. <sup>1</sup>H NMR (400 MHz, CDCl<sub>3</sub>): δ 8.08 (d, *J* = 8.5 Hz, 1H), 7.34 (dd, *J* = 8.5, 2.1 Hz, 1H), 7.30-7.27 (m, 2H), 7.244-7.239 (m, 1H), 6.96-6.92 (m, 2H), 3.94 (t, *J* = 6.4 Hz, 2H), 3.83 (s, 3H), 3.12 (t, *J* = 6.4 Hz, 2H). <sup>13</sup>C NMR (125 MHz, CDCl<sub>3</sub>): δ 163.6 (C), 157.9 (C), 139.9 (C), 137.9 (C), 135.7 (C), 130.3 (CH), 128.2 (C), 127.5 (CH), 126.9 (CH), 126.6 (CH), 114.2 (CH), 55.5 (CH<sub>3</sub>), 49.5 (CH<sub>2</sub>), 28.4 (CH<sub>2</sub>). IR (ATR):



1510, 1250, 1090, 1030, 840  $\text{cm}^{-1}$ . HRMS (DART):  $m/z$   $[\text{M}+\text{H}]^+$  Calcd for  $\text{C}_{16}\text{H}_{15}^{35}\text{ClNO}_2$ : 288.0791; found: 288.0781.

A flask was charged with  $\text{LiAlH}_4$  (56.9 mg, 1.5 mmol), and dry THF (12 mL) was added. Then, 6-chloro-2-(4-methoxyphenyl)-3,4-dihydroisoquinoline-1(2*H*)-one (287.7 mg, 1.0 mmol) was added at 0  $^\circ\text{C}$ , and the reaction mixture was refluxed for 20 h. Water and aqueous 1M NaOH were added, and then the resulting mixture was extracted with AcOEt. The combined organic layers were dried over  $\text{Na}_2\text{SO}_4$ . Concentration and purification through silica gel column chromatography (hexane/AcOEt = 15/1) gave 167.0 mg (0.61 mmol, 61% yield) of the desired product as colorless oil.  $^1\text{H}$  NMR (400 MHz,  $\text{CDCl}_3$ ):  $\delta$  7.15-7.14 (m, 2H), 7.07-7.04 (m, 1H), 6.99-6.95 (m, 2H), 6.89-6.85 (m, 2H), 4.24 (s, 2H), 3.78 (s, 3H), 3.42 (t,  $J = 6.0$  Hz, 2H), 2.95 (t,  $J = 6.0$  Hz, 2H).  $^{13}\text{C}$  NMR (125 MHz,  $\text{CDCl}_3$ ):  $\delta$  153.7 (C), 145.0 (C), 136.4 (C), 133.1 (C), 131.7 (C), 128.5 (CH), 127.8 (CH), 126.1 (CH), 118.2 (CH), 114.5 (CH), 55.6 ( $\text{CH}_3$ ), 52.3 ( $\text{CH}_2$ ), 48.2 ( $\text{CH}_2$ ), 28.9 ( $\text{CH}_2$ ). IR (ATR): 1510, 1240, 1190, 1090, 1030, 810  $\text{cm}^{-1}$ . HRMS (DART)  $m/z$ :  $[\text{M}+\text{H}]^+$  Calcd for  $\text{C}_{16}\text{H}_{17}^{35}\text{ClNO}$ : 274.0999; found: 274.0988.

#### 6-Methylisochroman (4b)

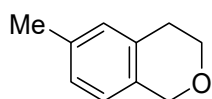

To the solution of 6-bromoisochroman<sup>17</sup> (426.1 mg, 2.0 mmol) in dry THF (8.0 mL) was added *n*-BuLi (2.0 M in cyclohexane, 1.5 mL, 3.0 mmol) dropwise at -78  $^\circ\text{C}$ . The mixture was stirred at -78  $^\circ\text{C}$  for 2 h. Then, dimethyl sulfate (252.3 mg, 2.0 mmol) was added dropwise at -78  $^\circ\text{C}$ . The reaction mixture was gradually warmed to rt and stirred at rt for 6 h. Water was added, and then the resulting mixture was extracted with AcOEt. The combined organic layers were dried over  $\text{Na}_2\text{SO}_4$ . Concentration and purification through silica gel column chromatography (hexane/AcOEt = 15/1) gave 174.1 mg (1.17 mmol, 59% yield) of the desired product as colorless oil.  $^1\text{H}$  NMR (400 MHz,  $\text{CDCl}_3$ ):  $\delta$  7.02 (d,  $J = 7.8$  Hz, 1H), 6.98 (d,  $J = 7.8$  Hz, 1H), 6.80 (s, 1H), 4.74 (s, 2H), 3.96 (t,  $J = 5.7$  Hz, 2H), 2.82 (t,  $J = 5.7$  Hz, 2H), 2.30 (s, 3H).  $^{13}\text{C}$  NMR (125 MHz,  $\text{CDCl}_3$ ):  $\delta$  135.5 (C), 134.7 (C), 130.1 (C), 128.7 (CH), 127.1 (CH), 124.8 (CH), 67.9 ( $\text{CH}_2$ ), 65.5 ( $\text{CH}_2$ ), 27.9 ( $\text{CH}_2$ ), 21.0 ( $\text{CH}_3$ ). IR (ATR): 1500, 1230, 1100, 810  $\text{cm}^{-1}$ . HRMS (DART):  $m/z$   $[\text{M}+\text{H}]^+$  Calcd for  $\text{C}_{10}\text{H}_{13}\text{O}$ : 149.0966; found: 149.0972.

#### 8-Methylisochroman (4f)

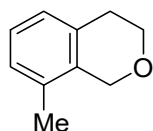

To the solution of 8-bromoisochroman<sup>17</sup> (426.1 mg, 2.0 mmol) in dry THF (8.0 mL) was added *n*-BuLi (2.0 M in cyclohexane, 1.5 mL, 3.0 mmol) dropwise at -78  $^\circ\text{C}$ . The mixture was stirred

at -78 °C for 2 h. Then, dimethyl sulfate (252.3 mg, 2.0 mmol) was added dropwise at -78 °C. The reaction mixture was gradually warmed to rt and stirred at rt for 6 h. Water was added, and then the resulting mixture was extracted with AcOEt. The combined organic layers were dried over Na<sub>2</sub>SO<sub>4</sub>. Concentration and purification through silica gel column chromatography (hexane/AcOEt = 15/1) gave 186.2 mg (1.26 mmol, 63% yield) of the desired product as colorless oil. <sup>1</sup>H NMR (400 MHz, CDCl<sub>3</sub>): δ 7.10-7.03 (m, 2H), 6.84 (d, *J* = 7.3 Hz, 1H), 4.77 (s, 2H), 4.02 (t, *J* = 5.7 Hz, 2H), 2.71 (t, *J* = 5.7 Hz, 2H), 2.23 (s, 3H). <sup>13</sup>C NMR (125 MHz, CDCl<sub>3</sub>): δ 136.4 (C), 134.7 (C), 131.7 (C), 127.6 (CH), 125.6 (CH), 122.0 (CH), 68.2 (CH<sub>2</sub>), 65.5 (CH<sub>2</sub>), 26.0 (CH<sub>2</sub>), 18.8 (CH<sub>3</sub>). IR (ATR): 1510, 1230, 1100, 810 cm<sup>-1</sup>. HRMS (DART): *m/z* [M+H]<sup>+</sup> Calcd for C<sub>10</sub>H<sub>13</sub>O: 149.0966; found: 149.0962.

### 3. References

- (1) M. Brzozowski, J. A. Forni, G. P. Savage and A. Polyzos, *Chem. Commun.*, 2015, **51**, 334-337.
- (2) Z. Chen, S. Zheng, Z. Wang, Z. Liao and W. Yuan, *ChemPhotoChem*, 2021, **5**, 906-910.
- (3) For **1f**: (a) A. M. Nauth, N. Otto and T. Opatz, *Adv. Synth. Catal.*, 2015, **357**, 3424-3428; For **1g**: (b) J. Zhou, S. Wang, Y. Lu, L. Li, W. Duan, Q. Wang, H. Wang and W. Wei, *Green Chem.*, 2021, **23**, 767-773.
- (4) B. Yi, N. Yan, N. Yi, Y. Xie, X. Wen, C.-T. Au and D. Lan, *RSC Adv.*, 2019, **9**, 29721-29725.
- (5) For *N*-Boc-THIQ (**1j**): (a) S. Geng, B. Xiong, Y. Zhang, J. Zhang, Y. He and Z. Feng, *Chem. Commun.*, 2019, **55**, 12699-12702; For *N*-Bn-THIQ (**1q**): (b) Y. Zhao, J. Jin, P. Wai and H. Chan, *Adv. Synth. Catal.*, 2019, **361**, 1313-1321.
- (6) H.-L. Liu, Z. He, N.-N. Wang, H. Xu, P. Fang and T.-S. Mei, *Org. Lett.* 2023, **25**, 608-613.
- (7) T. L. Andersen, M. W. Frederiksen, K. Domino and T. Skrydstrup, *Angew. Chem. Int. Ed.*, 2016, **55**, 10396-10400.
- (8) B. Du, C.-M. Chan, P.-Y. Lee, L.-H. Cheung, X. Xu, Z. Lin and W.-Y. Yu, *Nat. Commun.*, 2021, **12**, 412.
- (9) F. de Azambuja, S. M. Lovrien, P. Ross, B. R. Ambler and R. A. Altman, *J. Org. Chem.*, 2019, **84**, 2061-2071.
- (10) T. Meiresonne, G. Verniest, N. De Kimpe and S. Mangelinckx, *J. Org. Chem.*, 2015, **80**, 5111-5124.
- (11) S. E. Reisman, A. G. Doyle and E. N. Jacobsen, *J. Am. Chem. Soc.*, 2008, **130**, 7198-7199.
- (12) R. Yang, Z.-F. Gao, J.-Y. Zhao, W.-B. Li, L. Zhou and F. Miao, *J. Agric. Food Chem.*, 2015, **63**, 1906-1914.
- (13) M. Mineno, Y. Sawai, K. Kanno, N. Sawada and H. Mizufune, *J. Org. Chem.*, 2013, **78**, 5843-5850.
- (14) Q. Chen, J. Zhou, Y. Wang, C. Wang, X. Liu, Z. Xu, L. Lin and R. Wang, *Org. Lett.*, 2015, **17**, 4212-4215.
- (15) D. Taniyama, M. Hasegawa and K. Tomioka, *Tetrahedron Lett.*, 2000, **41**, 5533-5536.
- (16) Y. Liu, J. Wu, M. Zhou, W. Chen, D. Li, Z. Wang, B. Hornsperger, J. D. Aebi, H.-P. Märki, B. Kuhn, L. Wang, A. Kuglstatter, J. Benz, S. Müller, R. Hochstrasser, G. Ottaviani, J. Xin, S. Kirchner, S. Mohr, P. Verry, W. Riboulet, H. C. Shen, A. V. Mayweg, K. Amrein and X. Tan, *J. Med. Chem.*, 2020, **63**, 6876-6897.
- (17) X. Liu, B. Sun, Z. Xie, X. Qin, L. Liu and H. Lou, *J. Org. Chem.*, 2013, **78**, 3104-3112.

3aa\_1H.esp

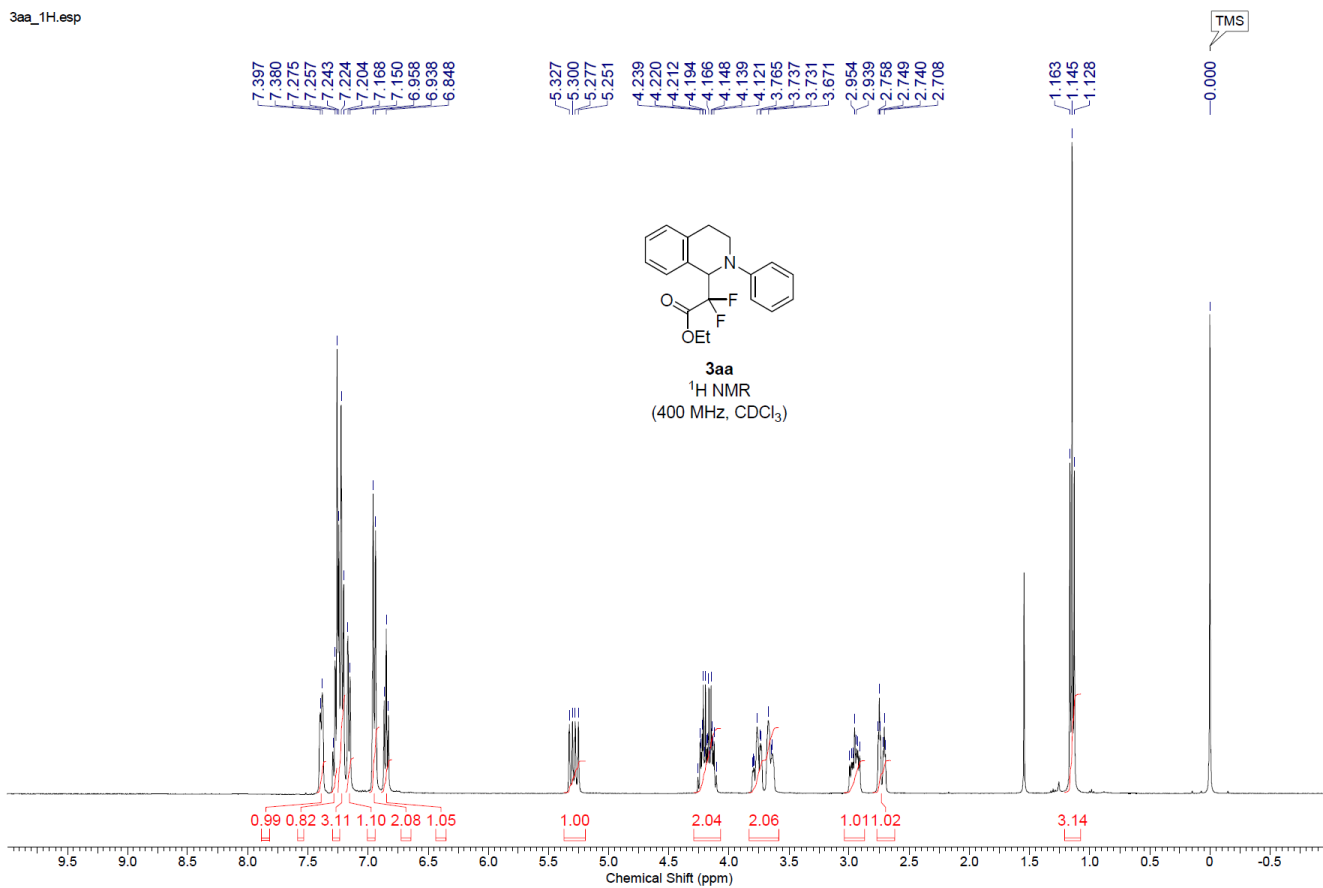

3aa\_13C.esp

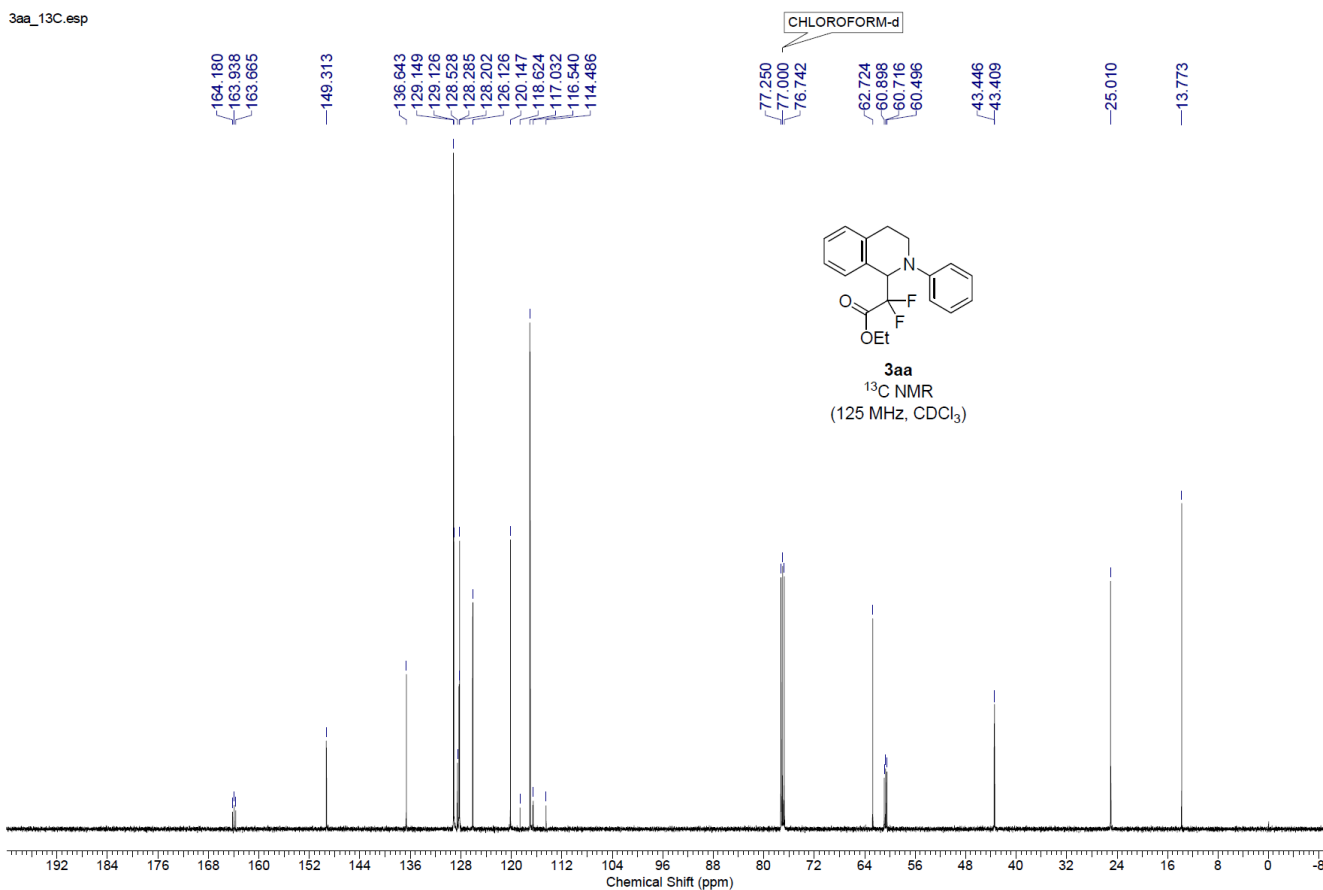

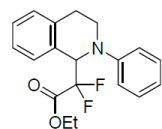

**3aa**  
<sup>19</sup>F NMR  
(376 MHz, CDCl<sub>3</sub>)

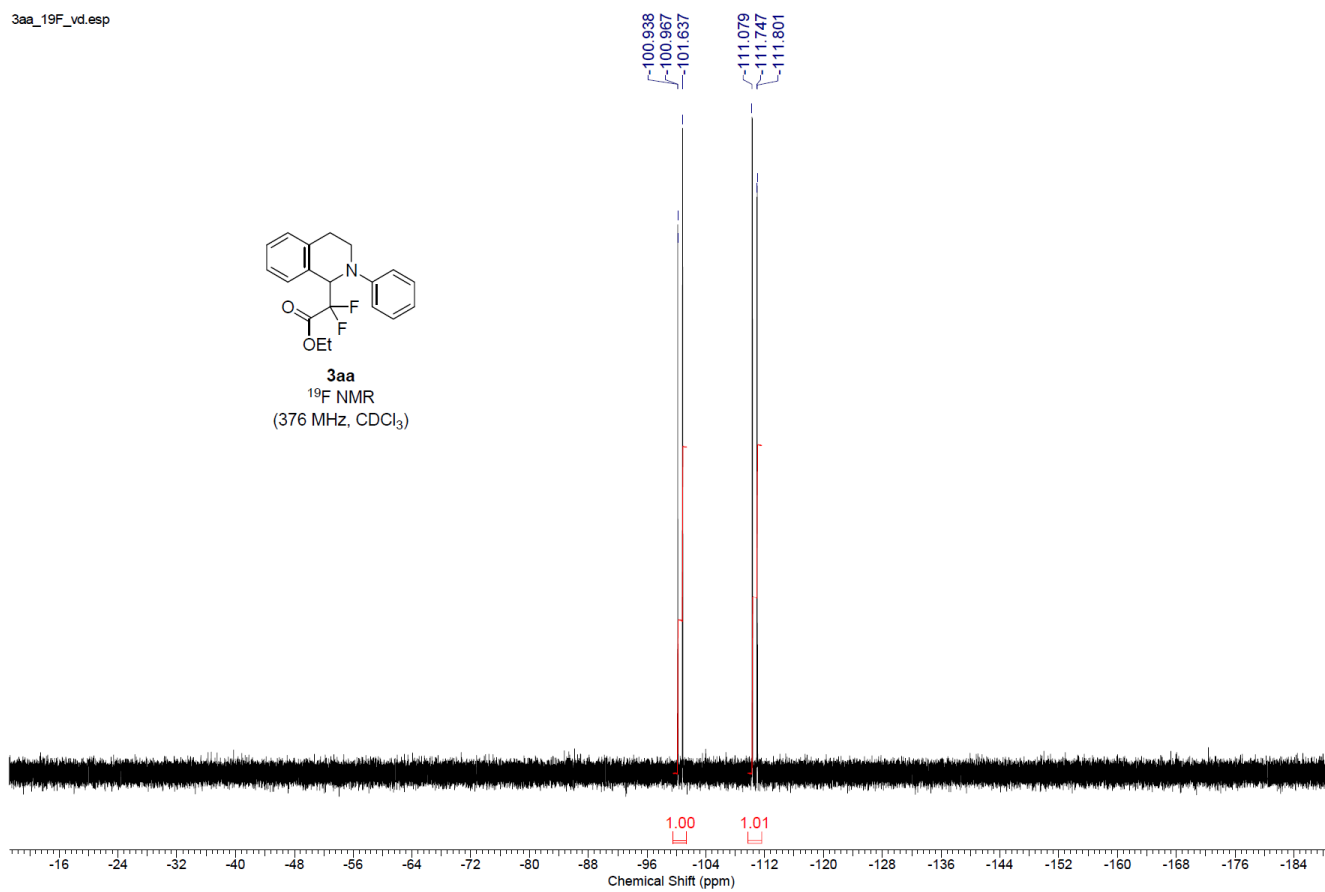

3ba\_1H.esp

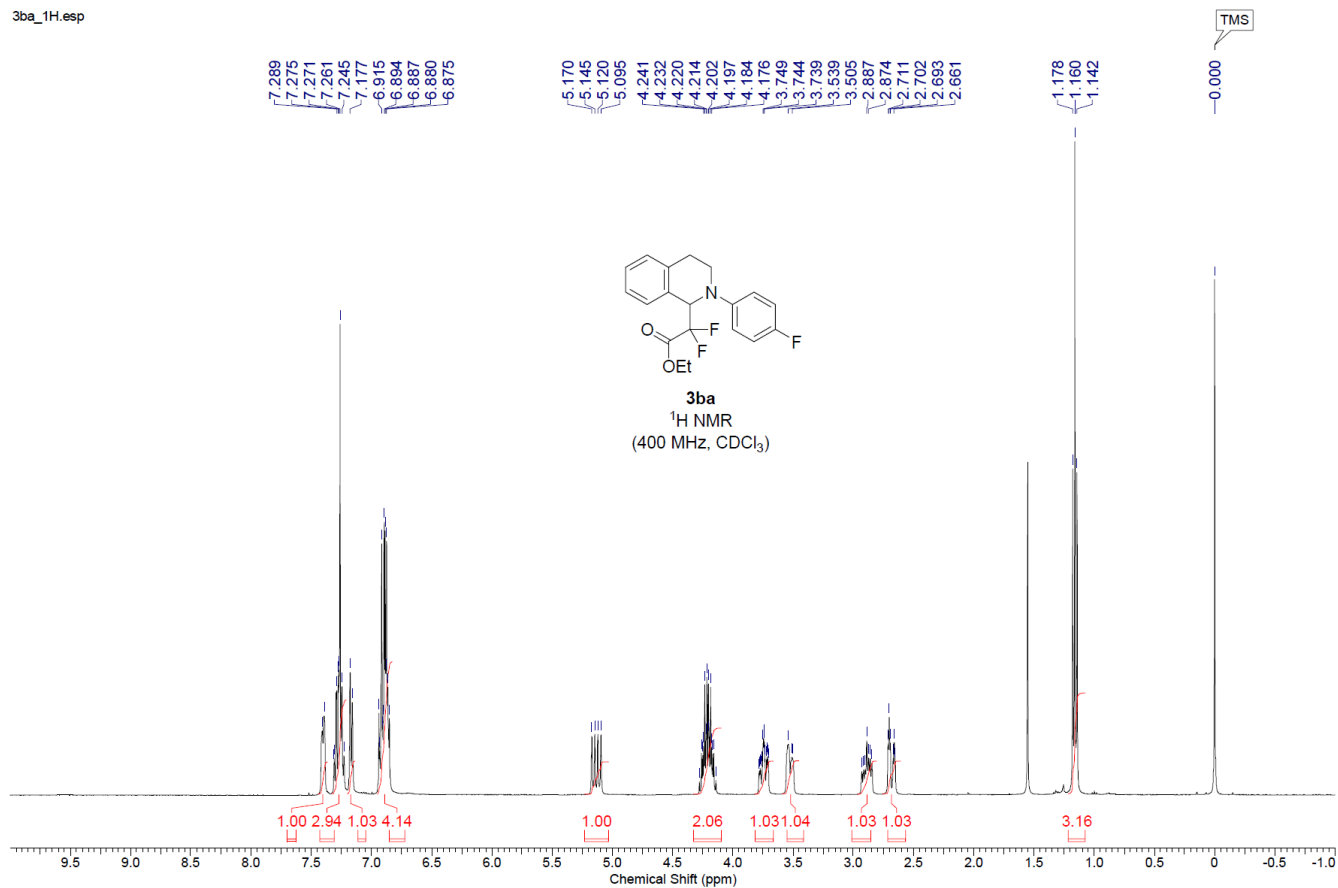

3ba\_13C.esp

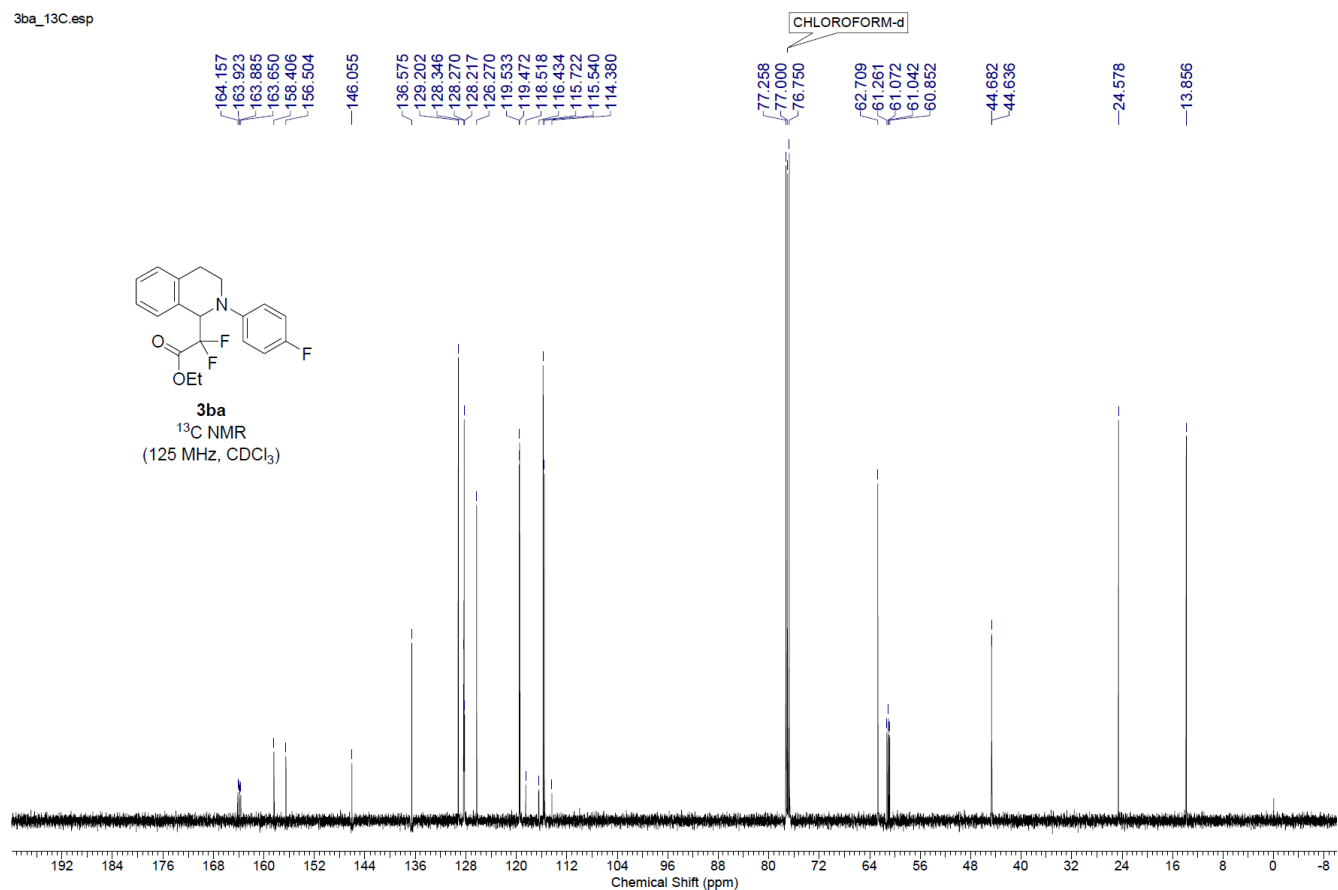

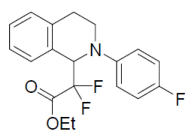

**3ba**  
<sup>19</sup>F NMR  
(376 MHz, CDCl<sub>3</sub>)

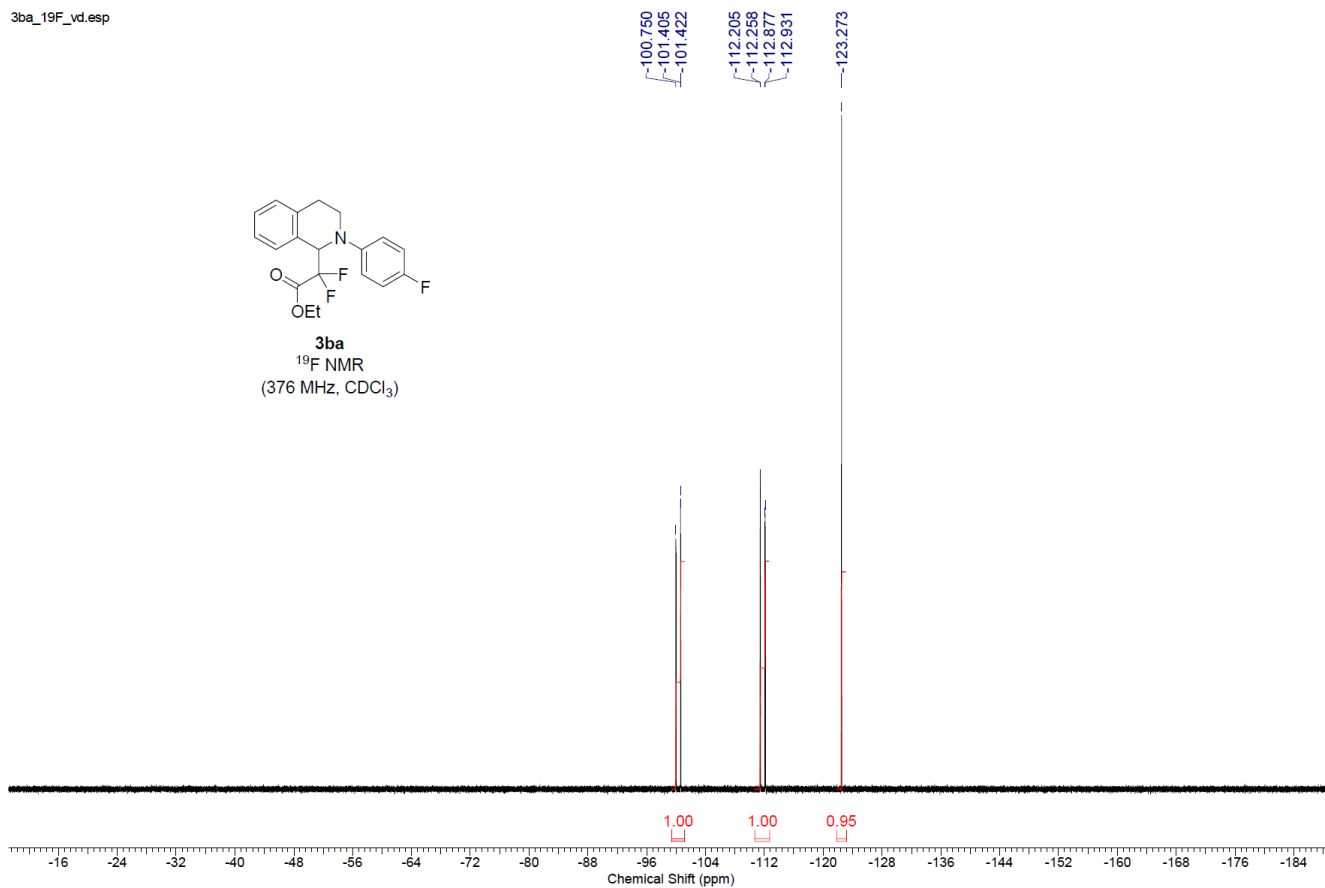

3ca\_1H.esp

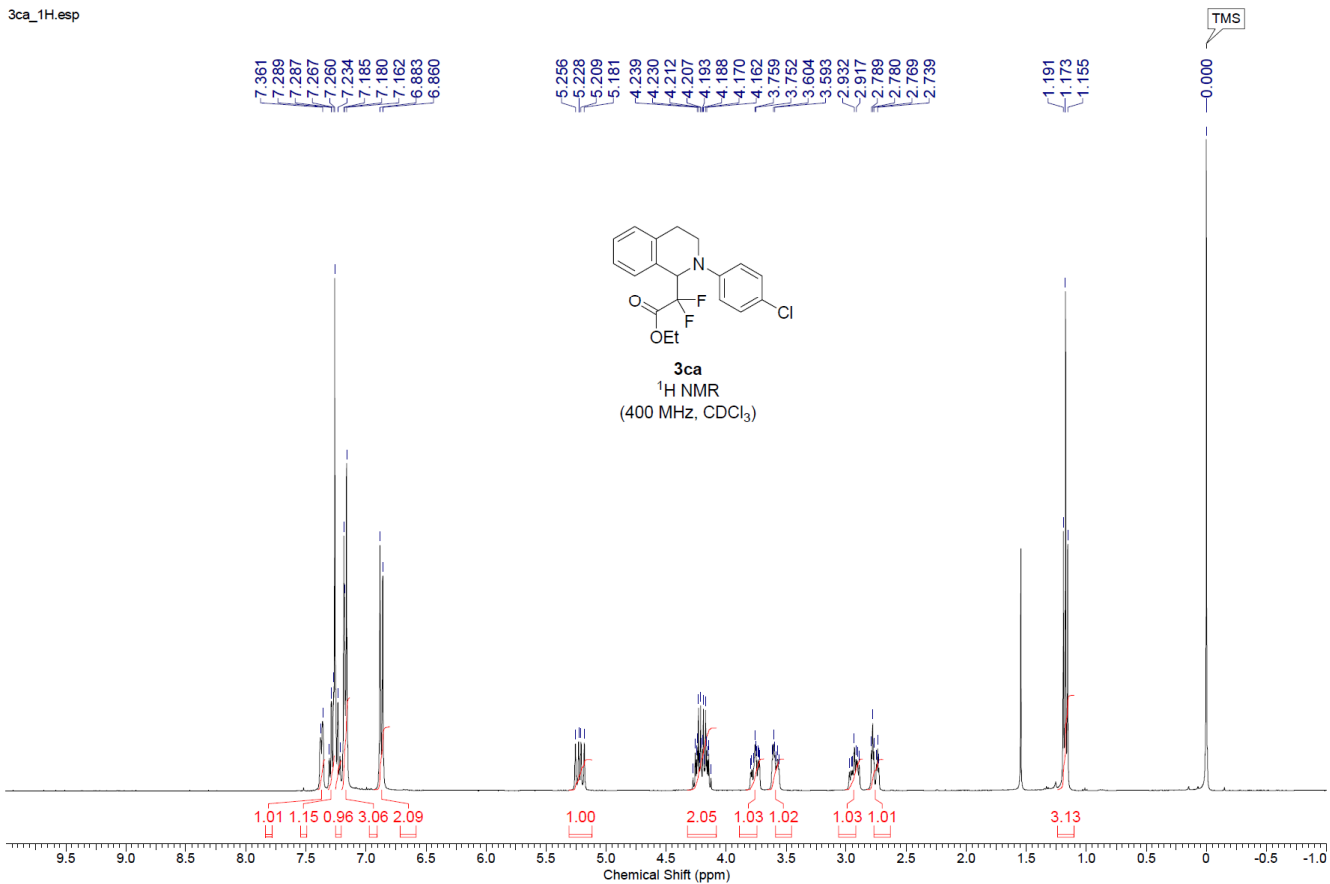

3ca\_13C.esp

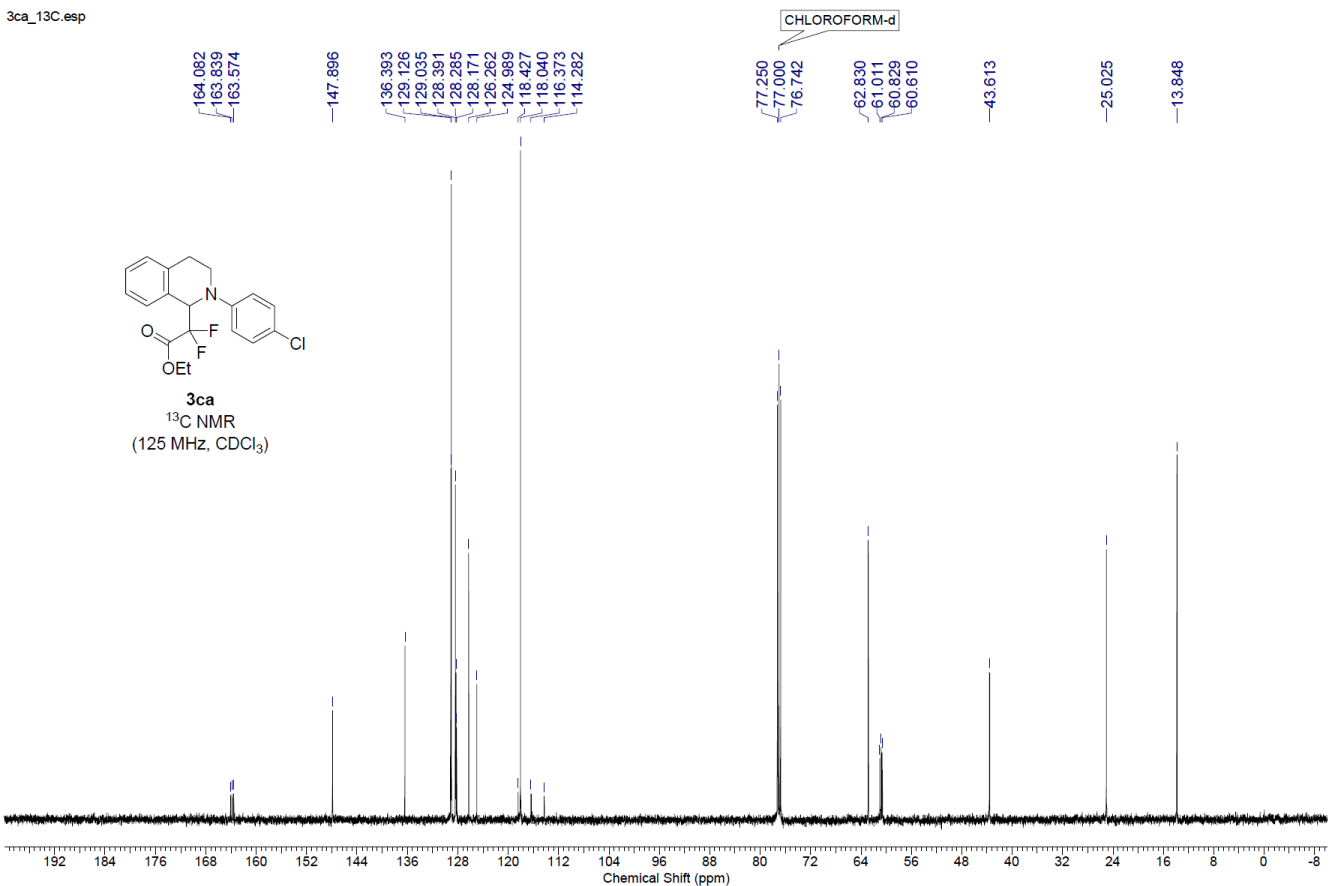



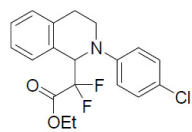

**3ca**  
<sup>19</sup>F NMR  
(376 MHz, CDCl<sub>3</sub>)

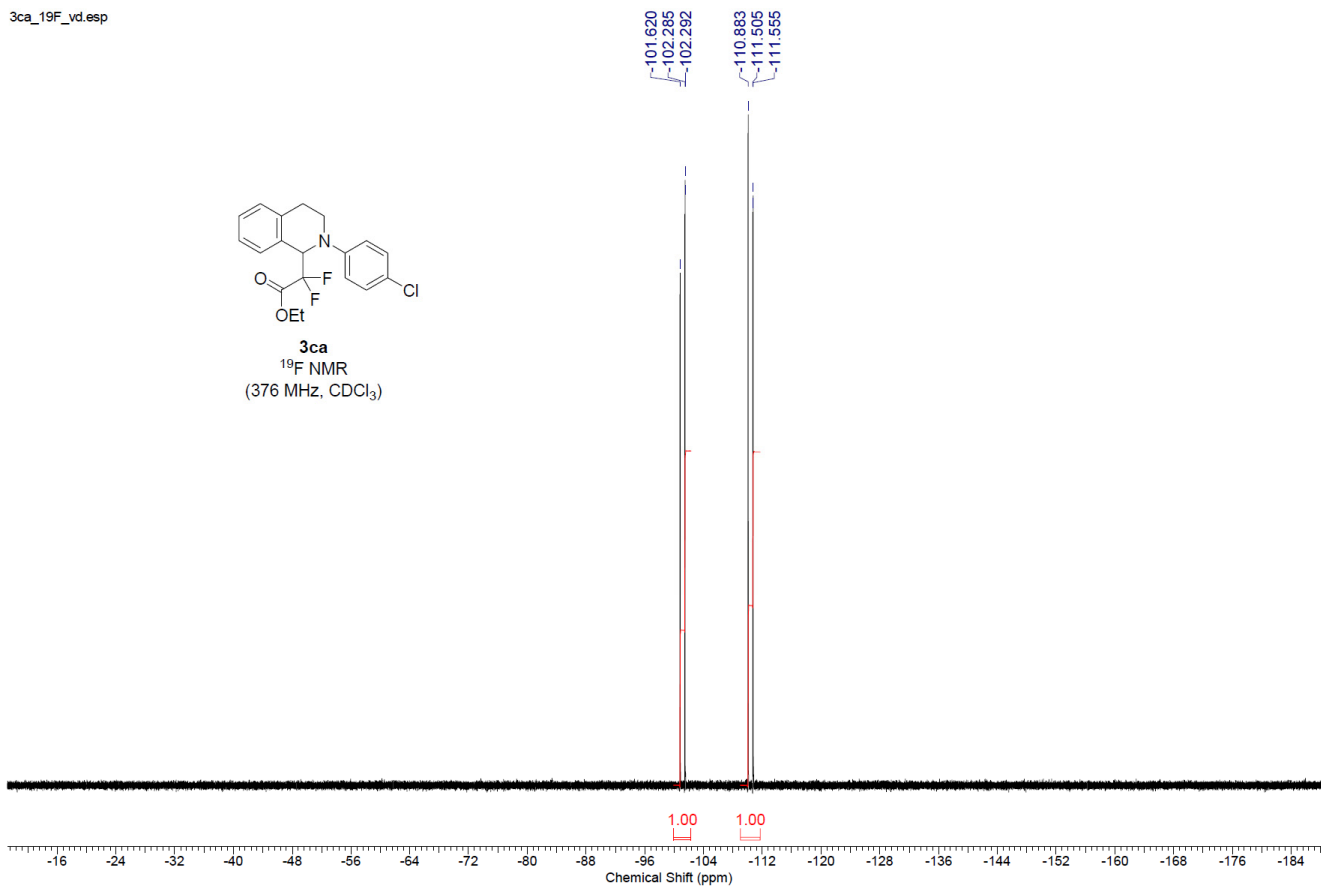

3da\_1H.esp

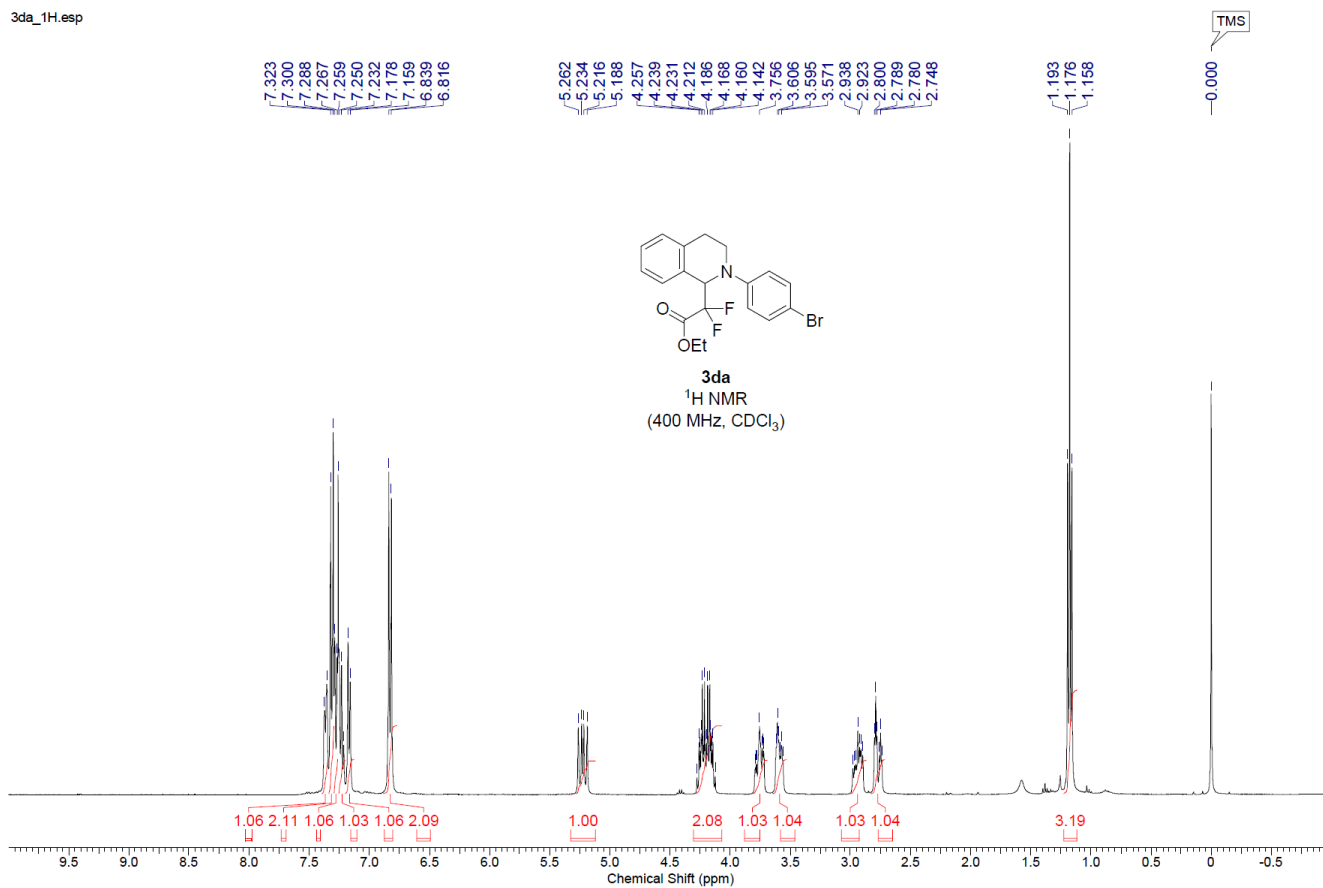

3da\_13C\_v2.esp

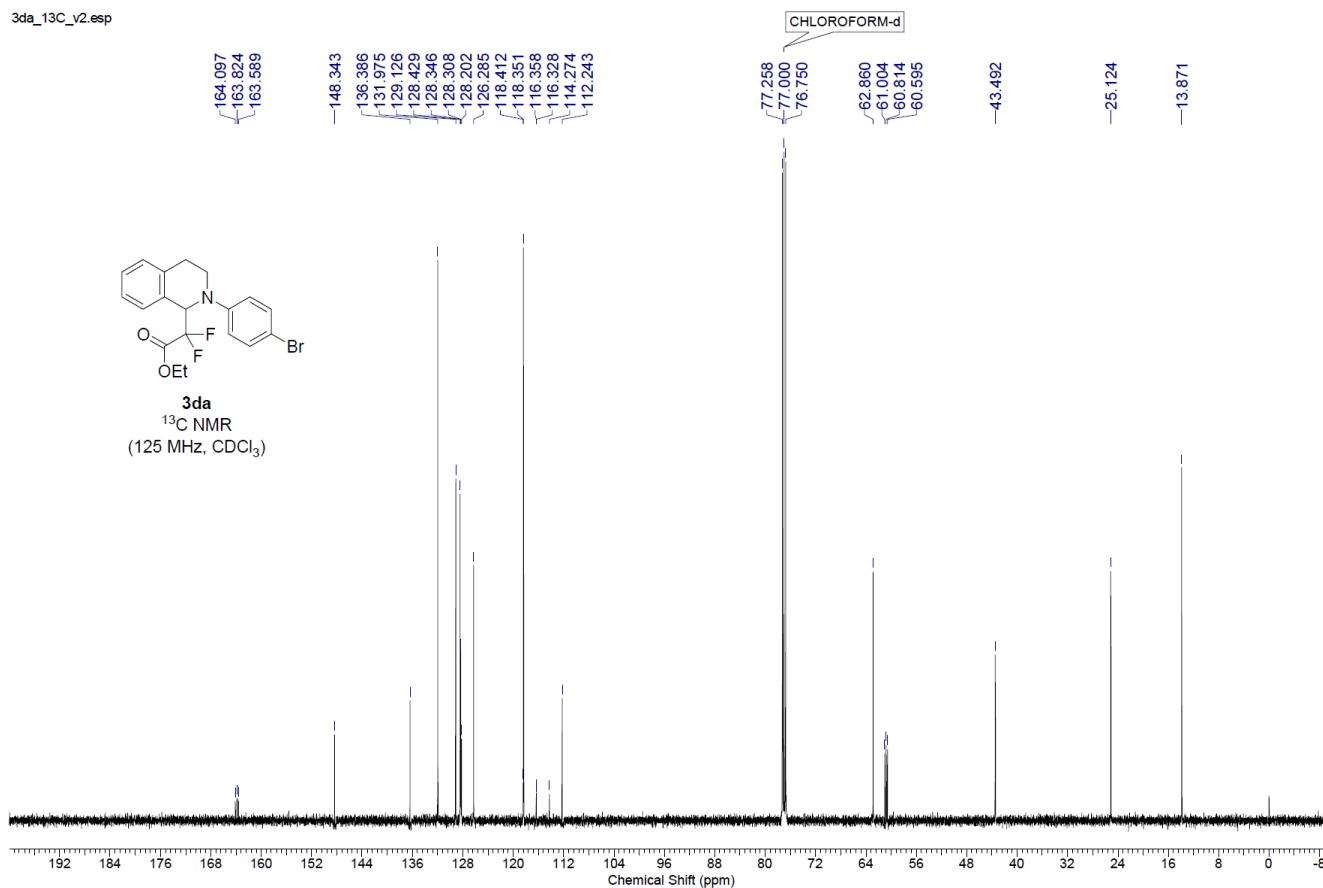

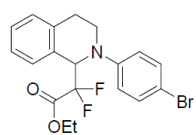

**3da**  
<sup>19</sup>F NMR  
(376 MHz, CDCl<sub>3</sub>)

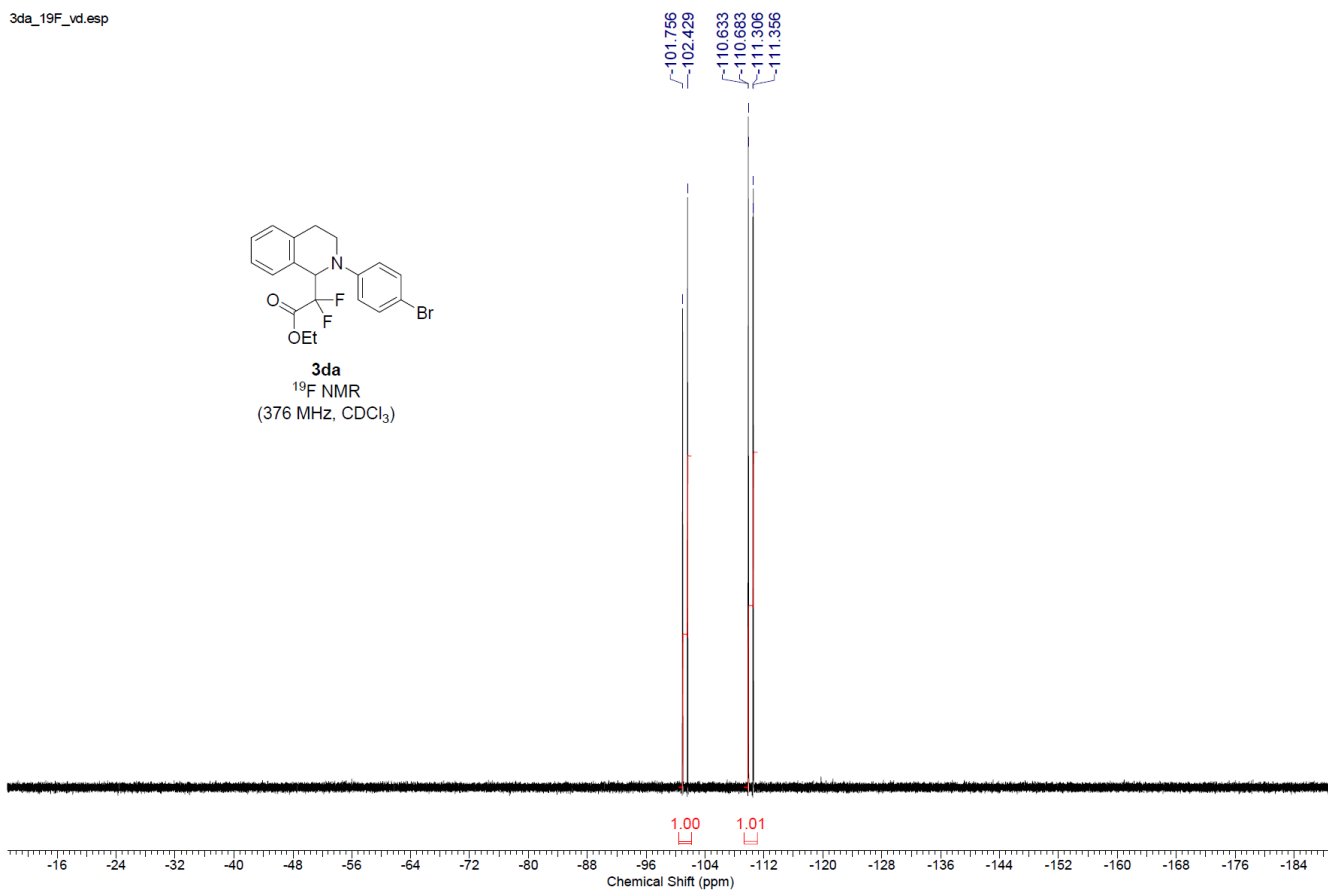

3ea\_1H.esp

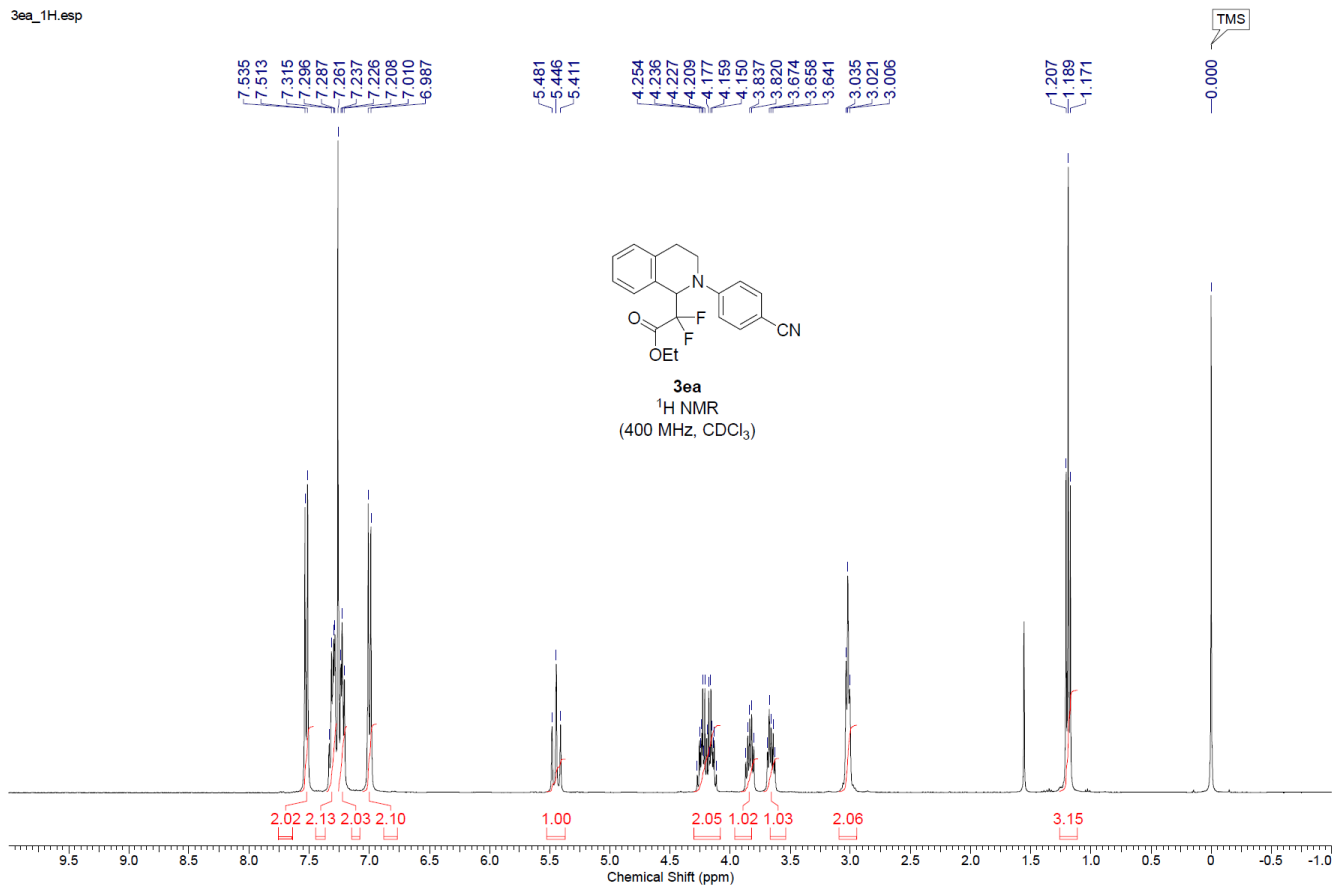

3ea\_13C.esp

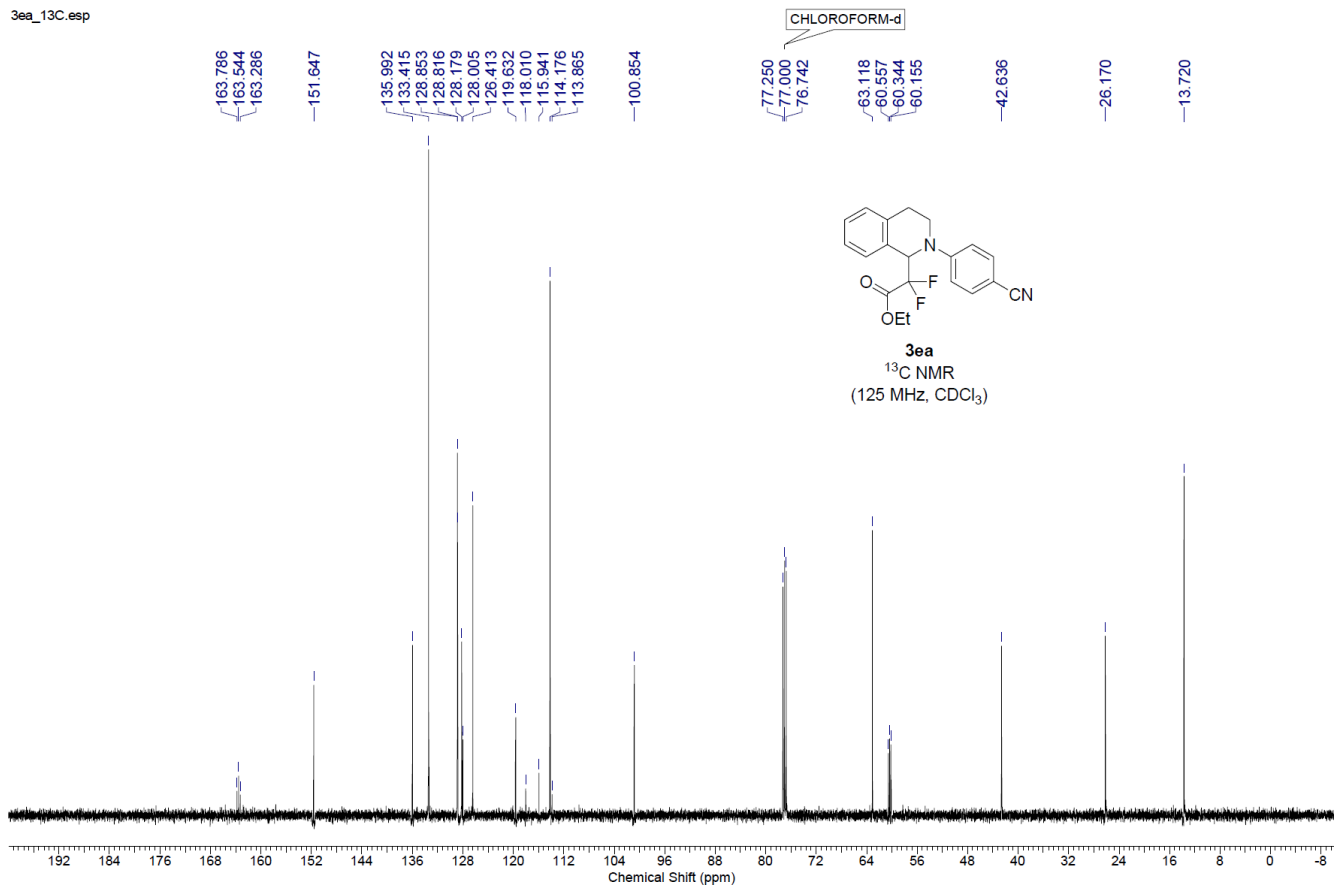

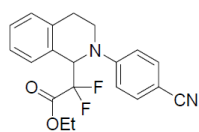

**3ea**  
<sup>19</sup>F NMR  
(376 MHz, CDCl<sub>3</sub>)

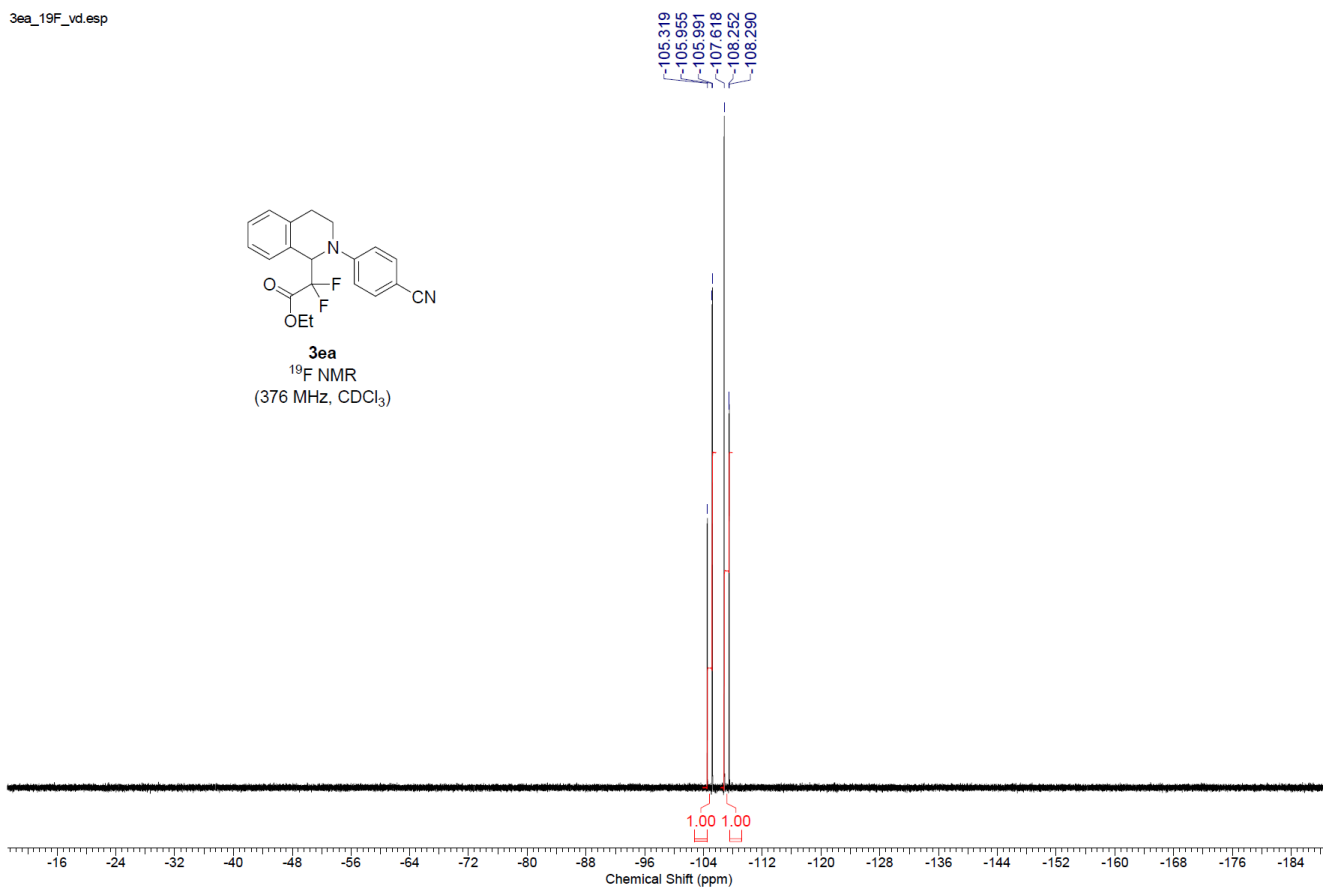

3fa\_1H\_v2.esp

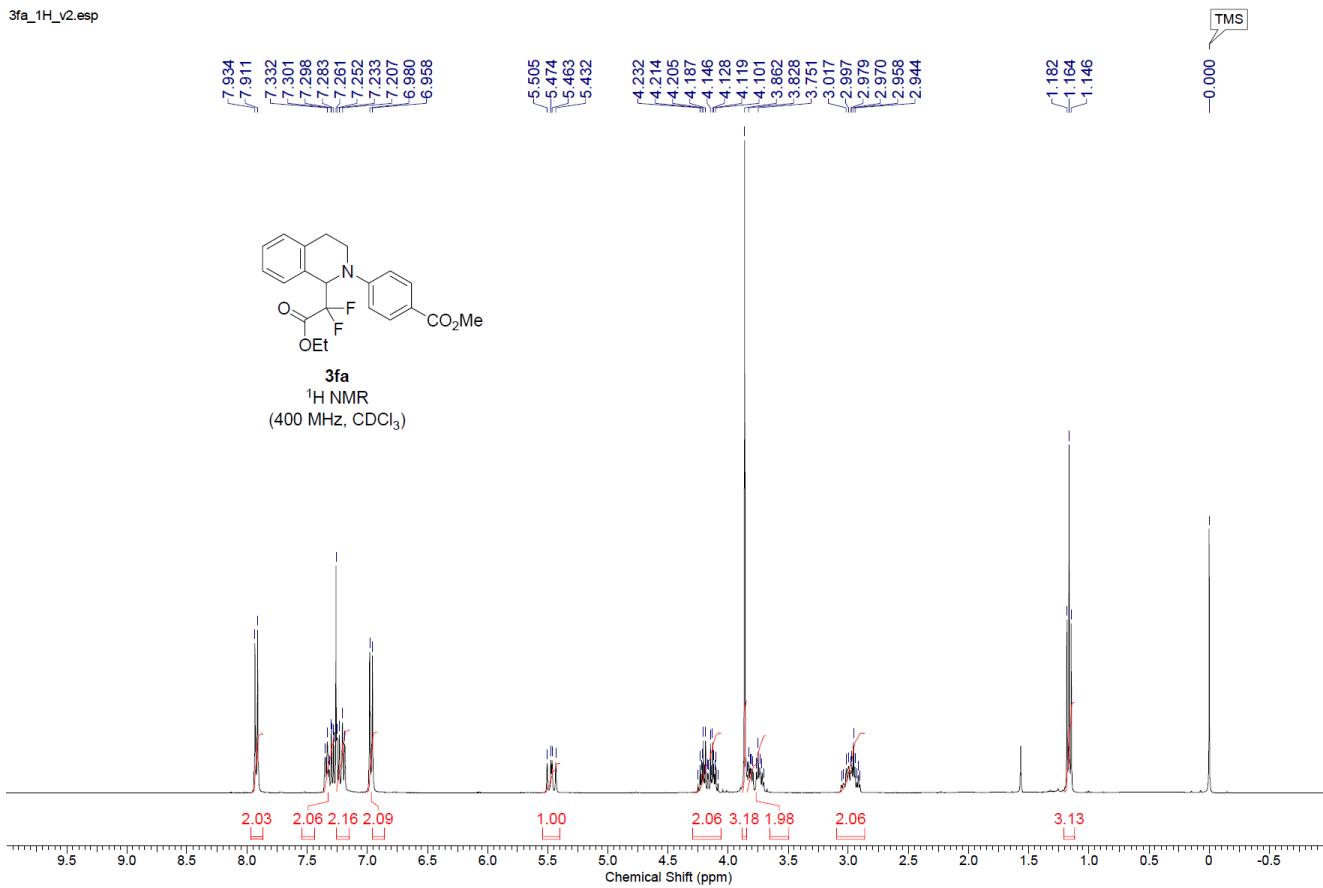

3fa\_13C.esp

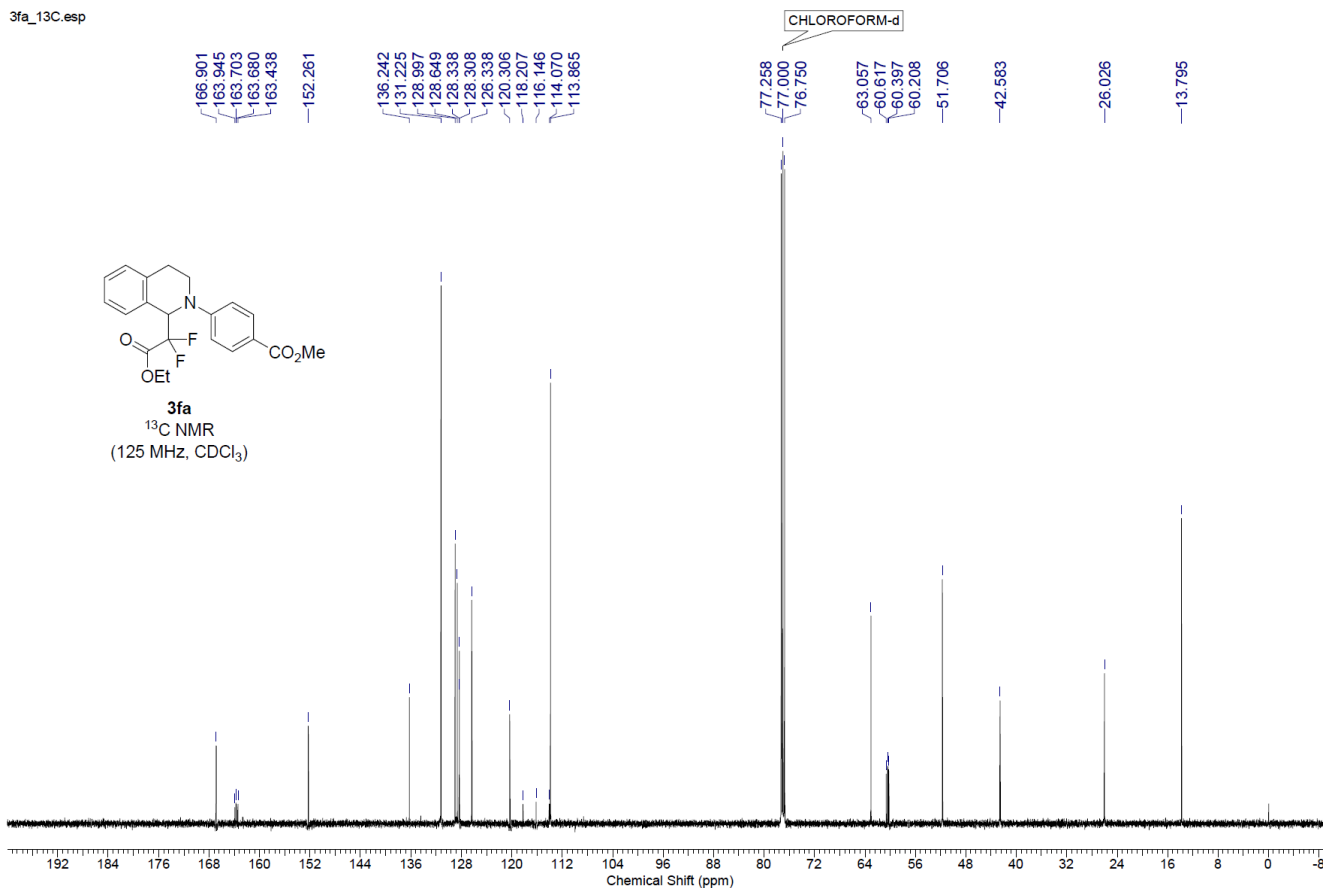

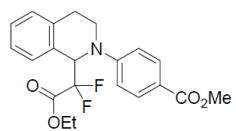

**3fa**  
<sup>19</sup>F NMR  
(376 MHz, CDCl<sub>3</sub>)

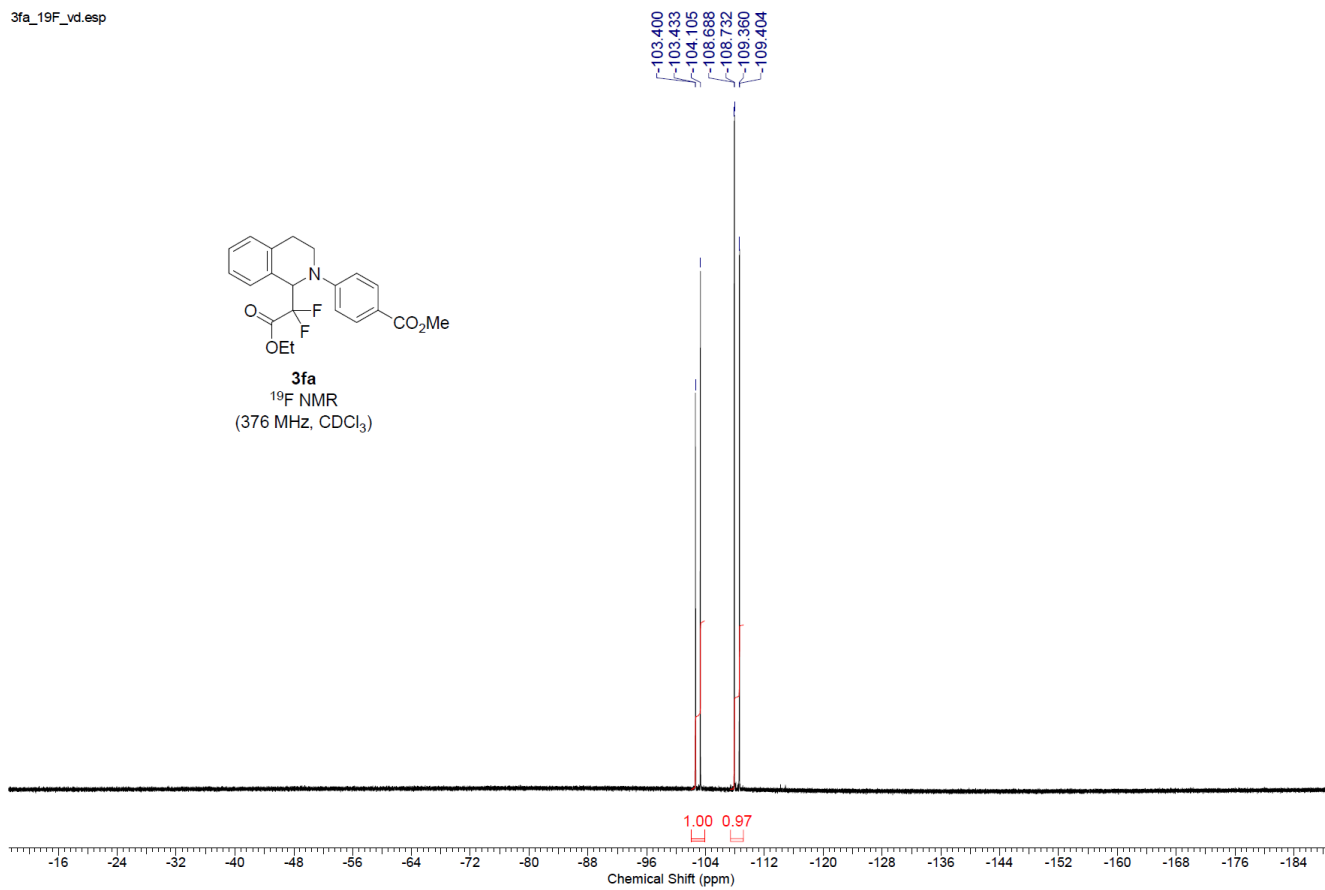

3ga\_1H\_vd2a.esp

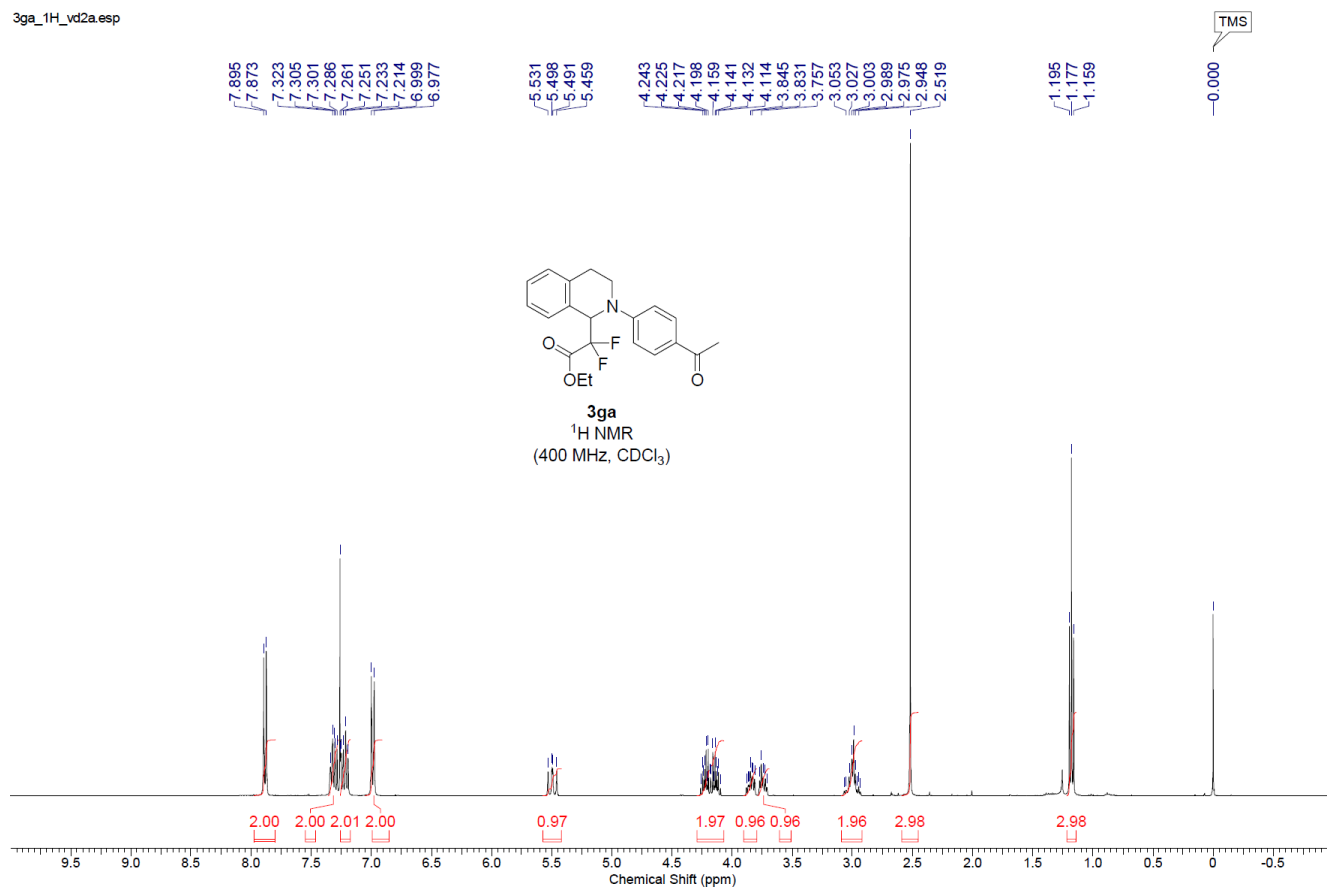

3ga\_13C\_va.esp

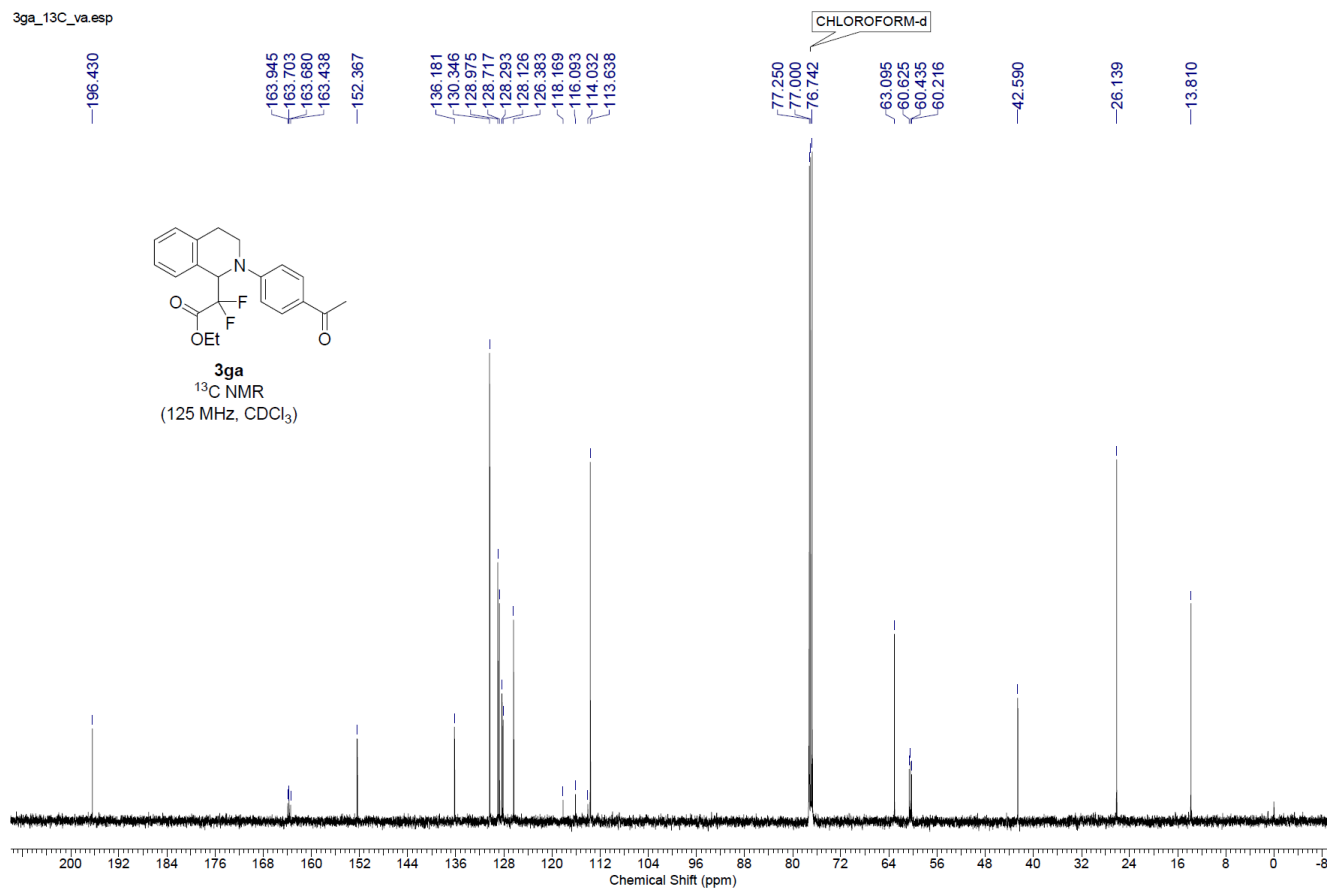



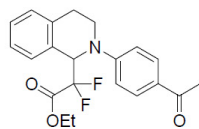

**3ga**  
<sup>19</sup>F NMR  
(376 MHz, CDCl<sub>3</sub>)

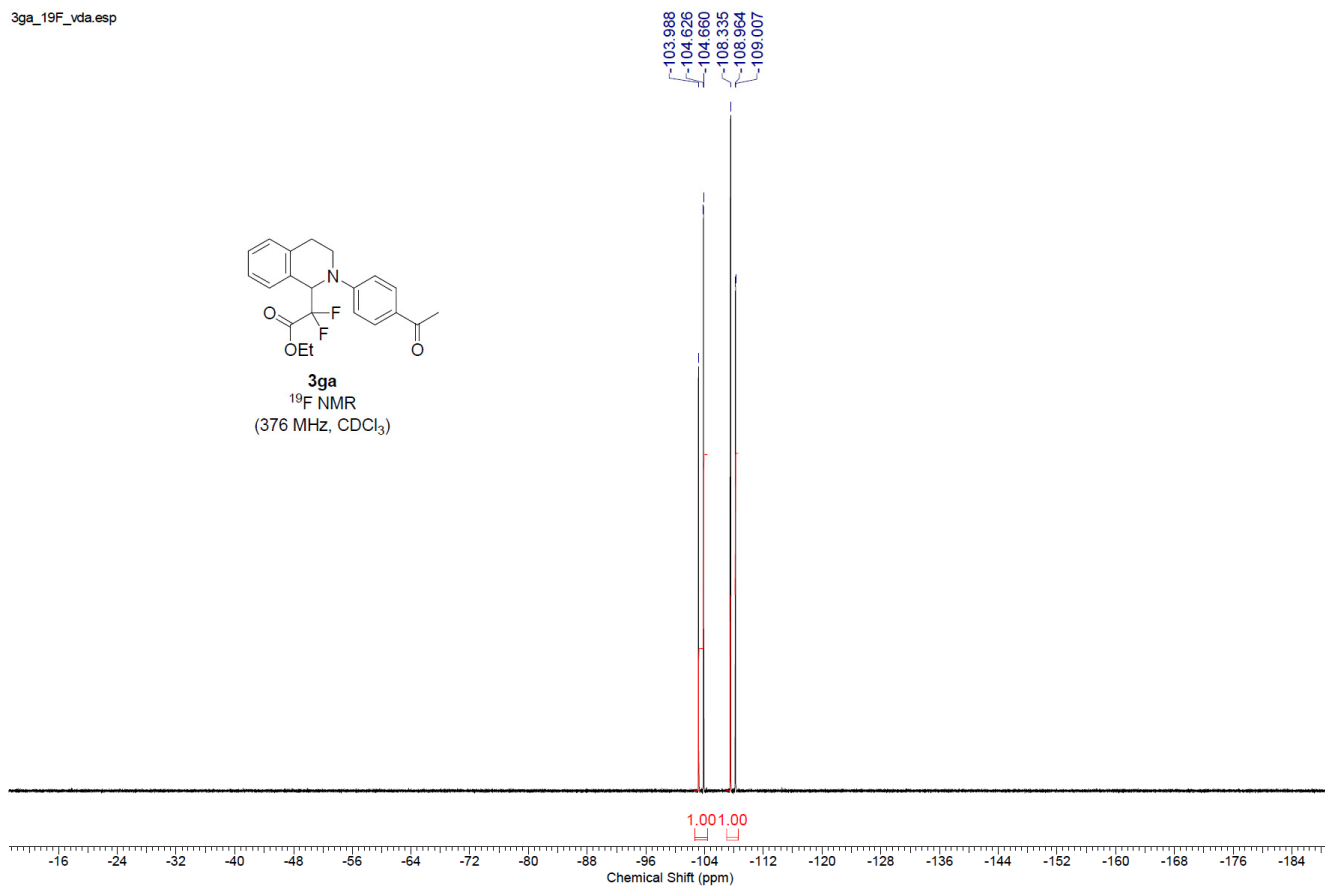

3ha\_1H\_vn.esp

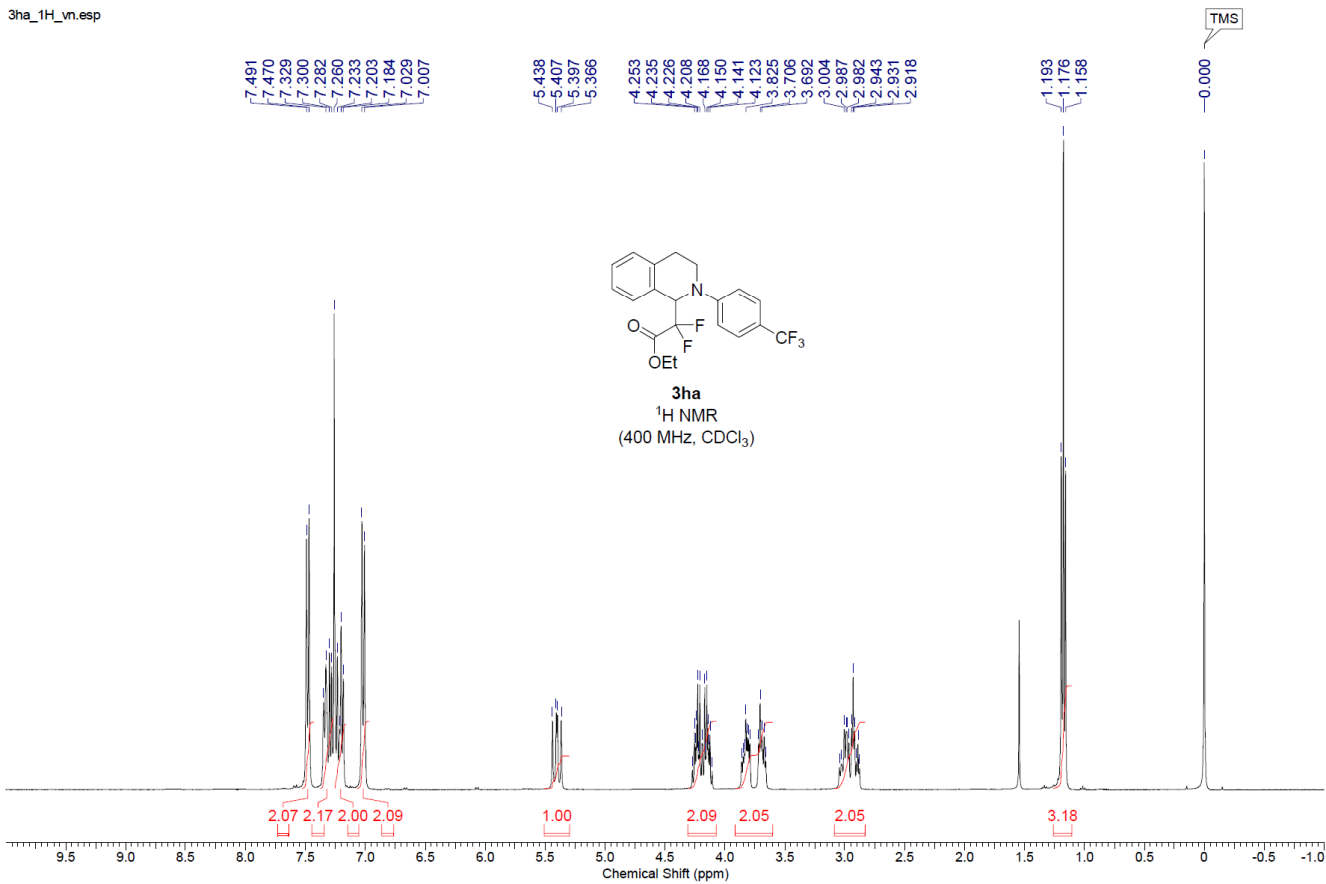

3ha\_13C\_vn.esp

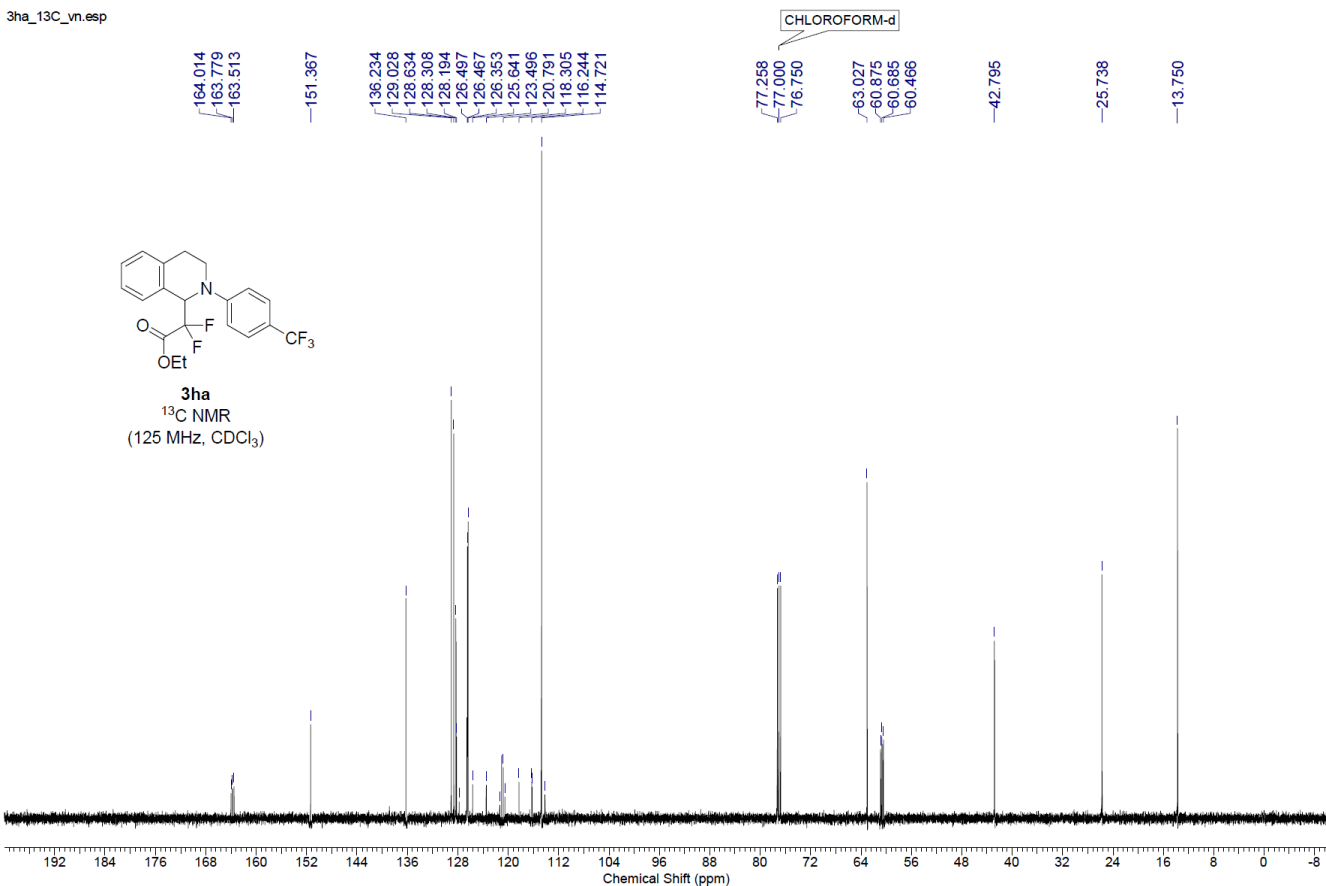

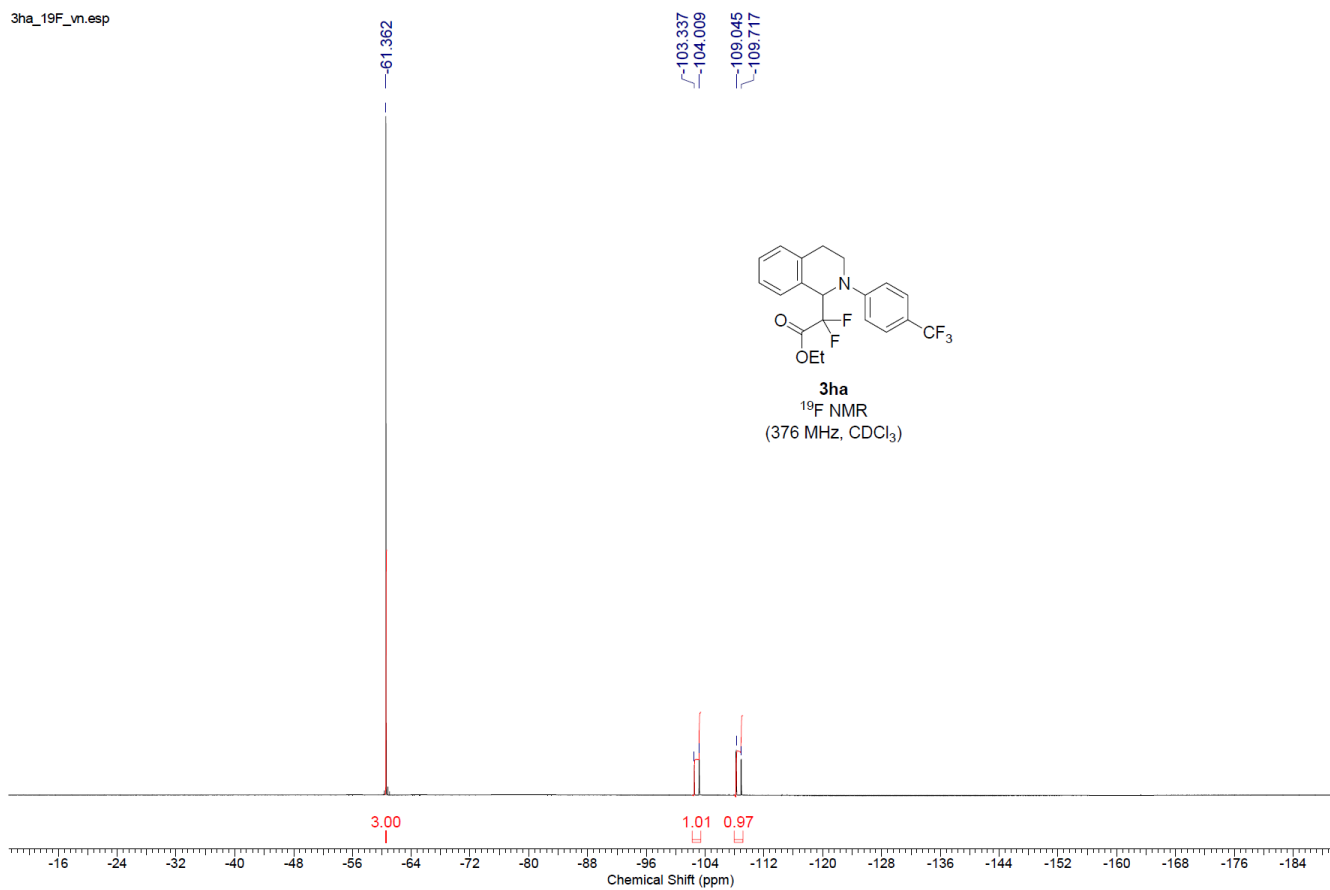

3ia\_1H\_vn.esp

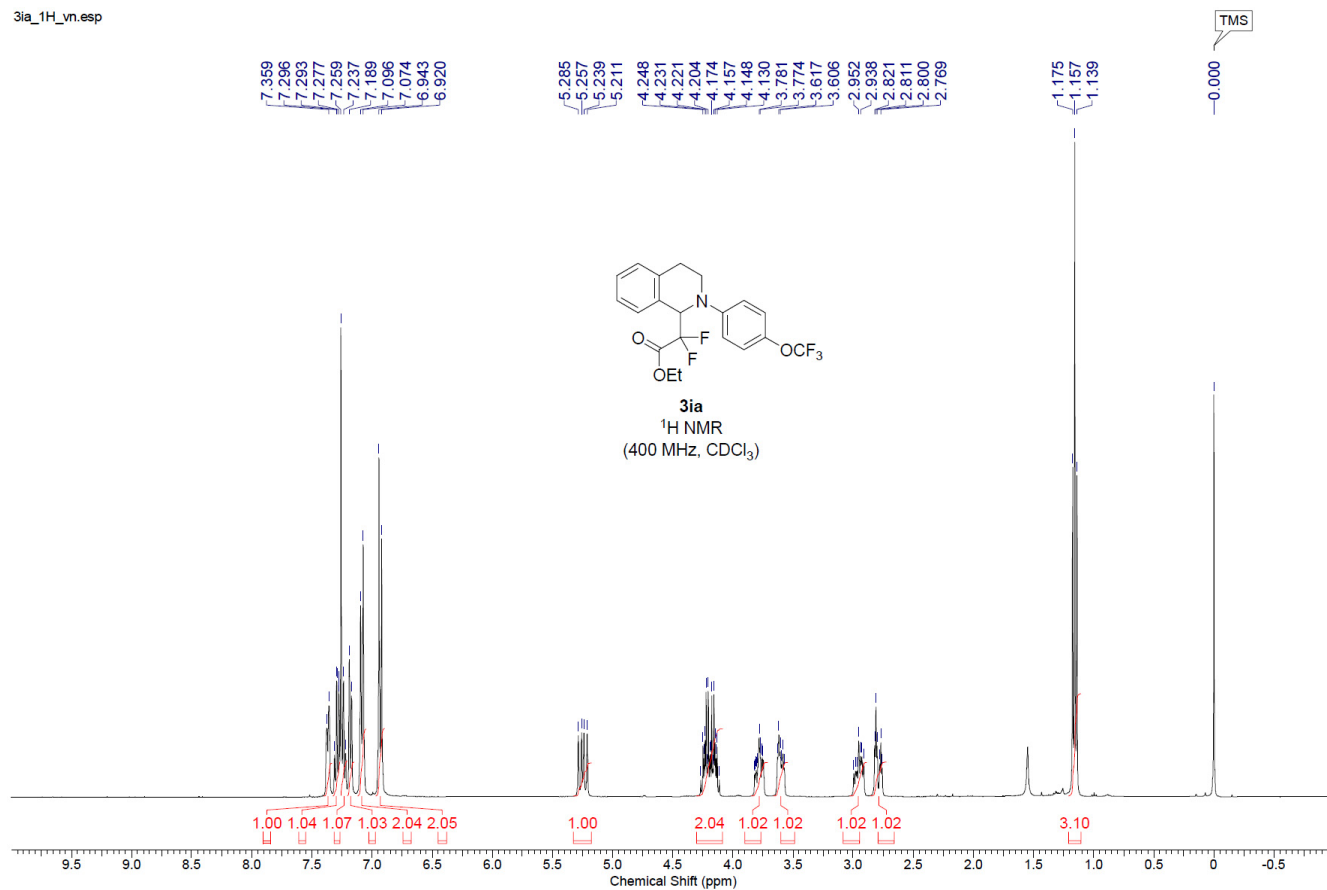

3ia\_13C\_v2h.esp

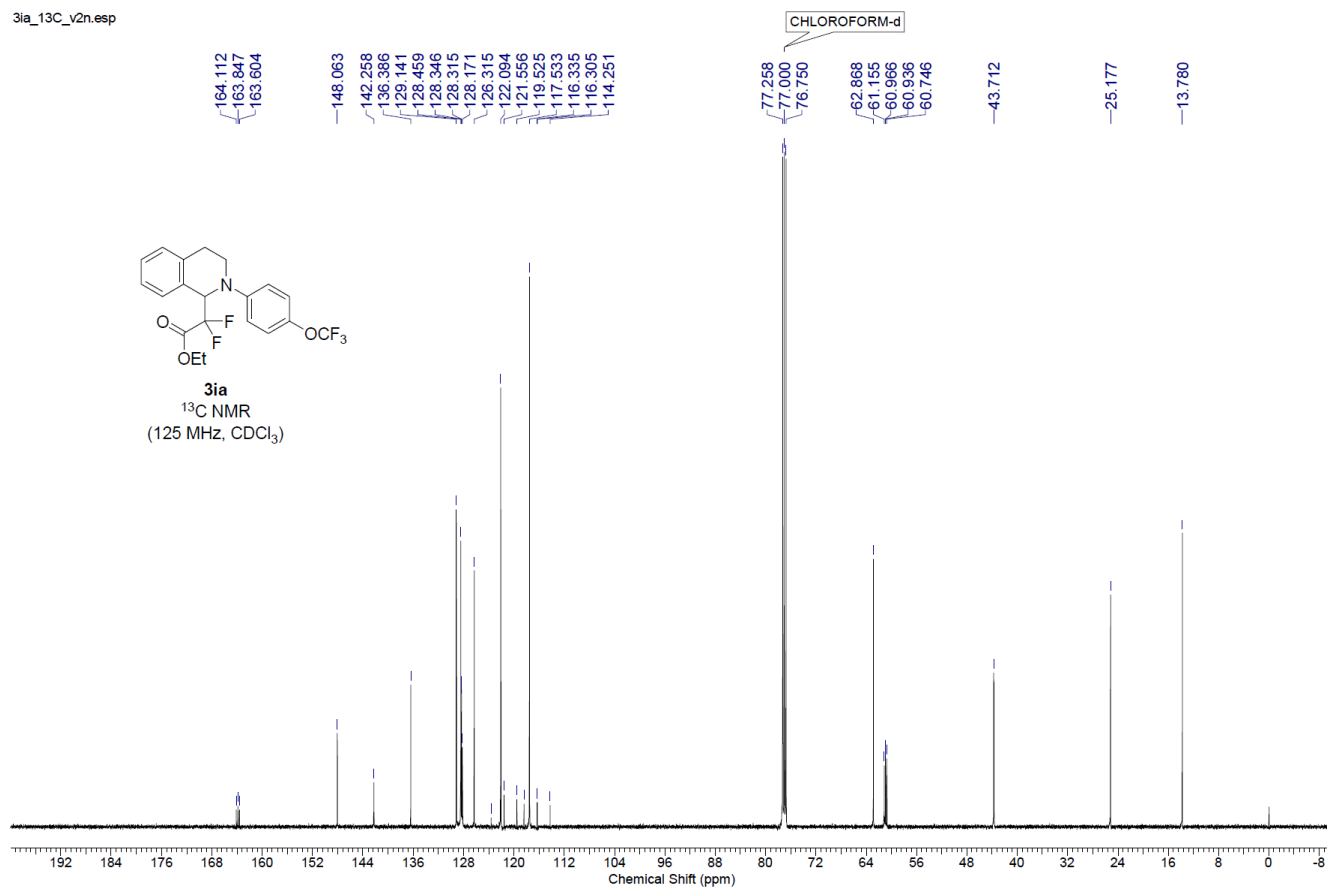

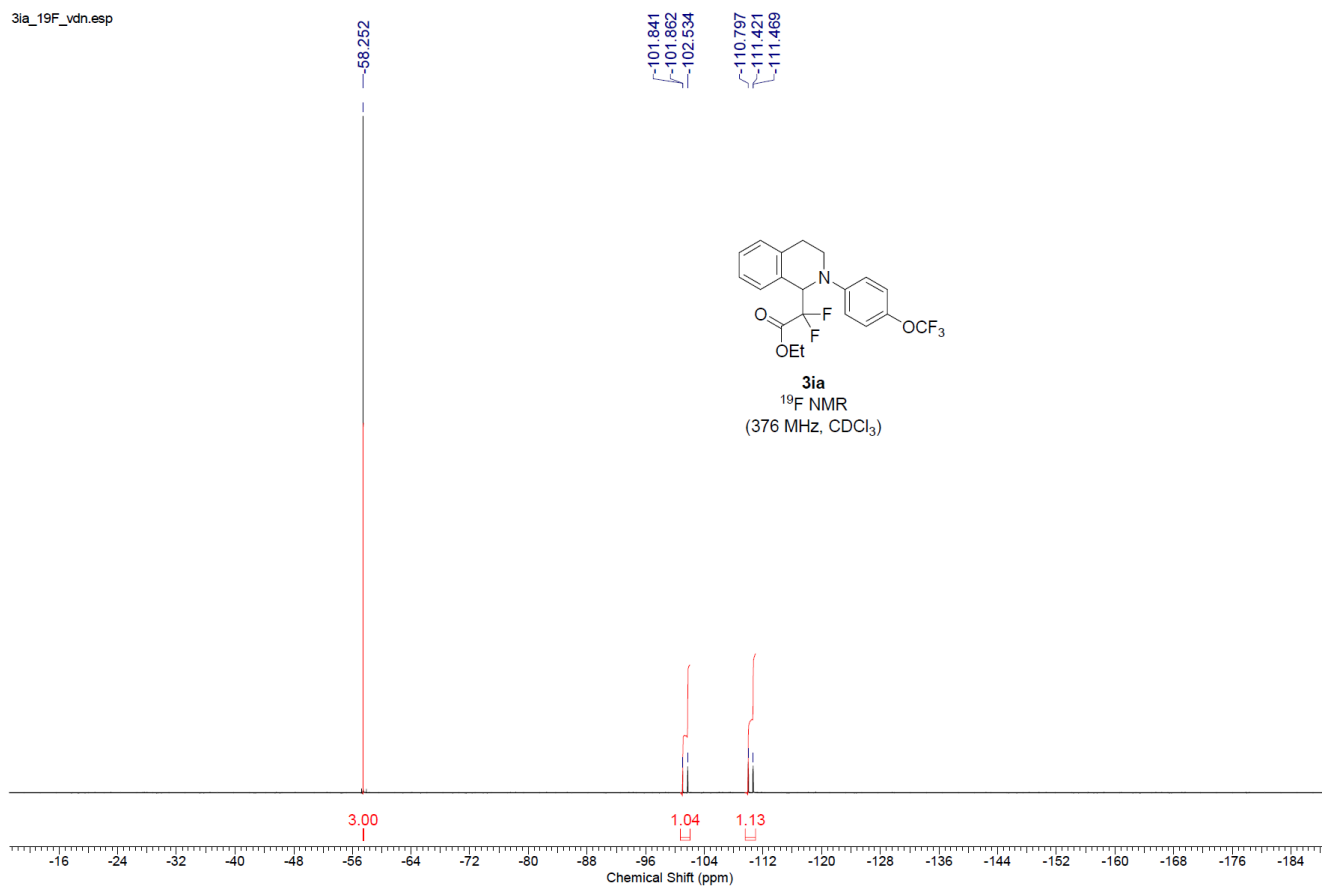

3ja\_1H\_va.esp

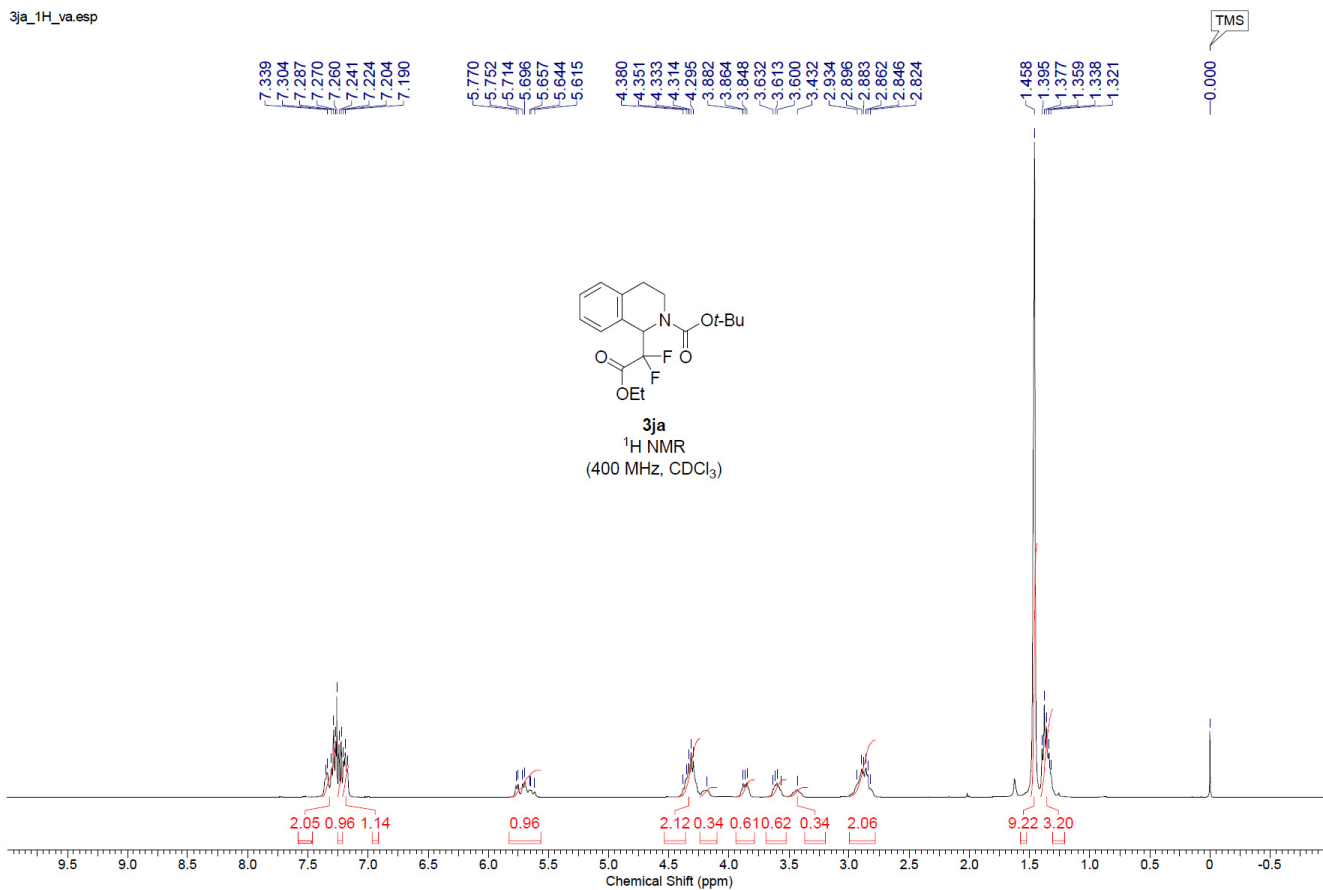

3ja\_13C\_v2a.esp

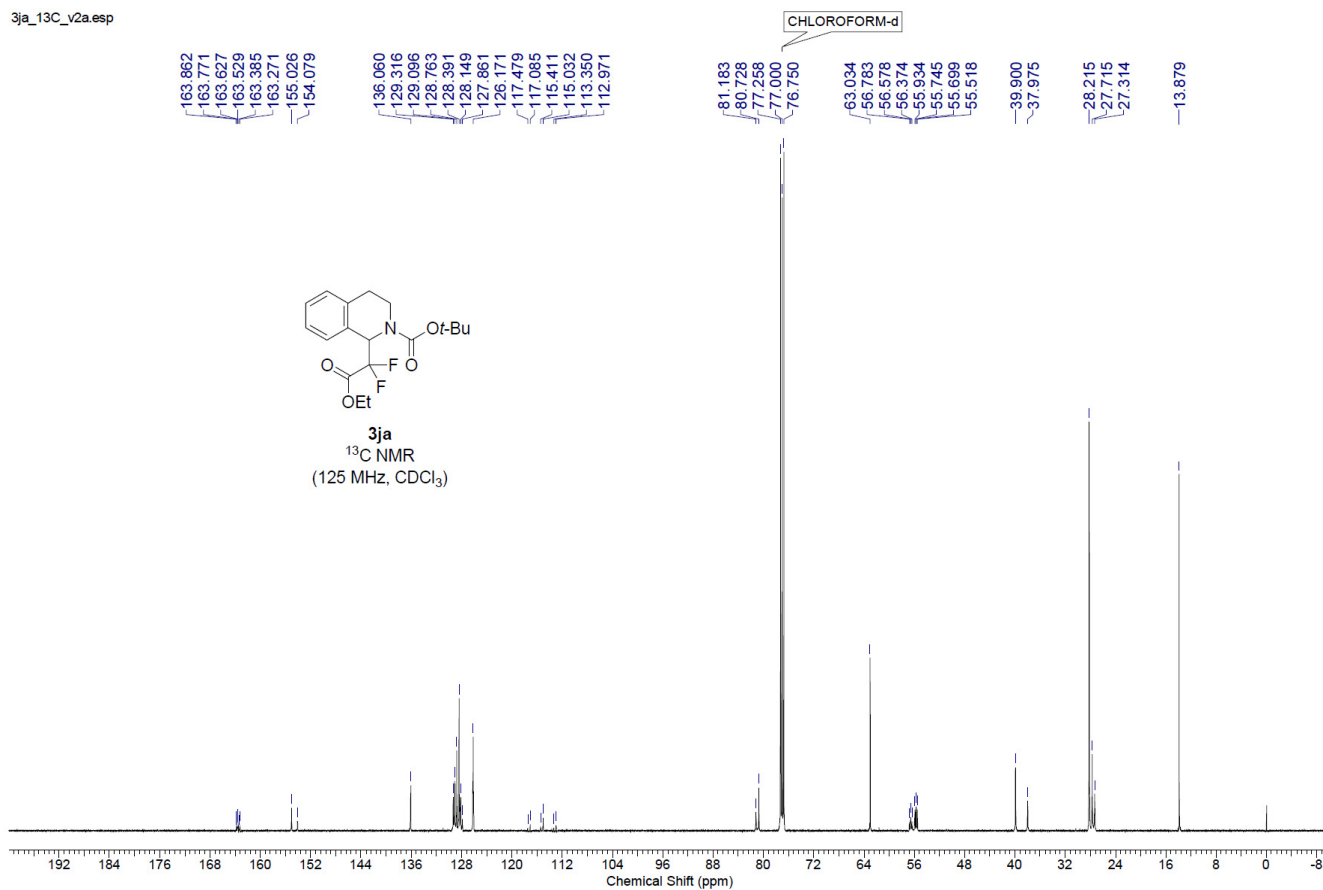

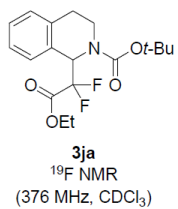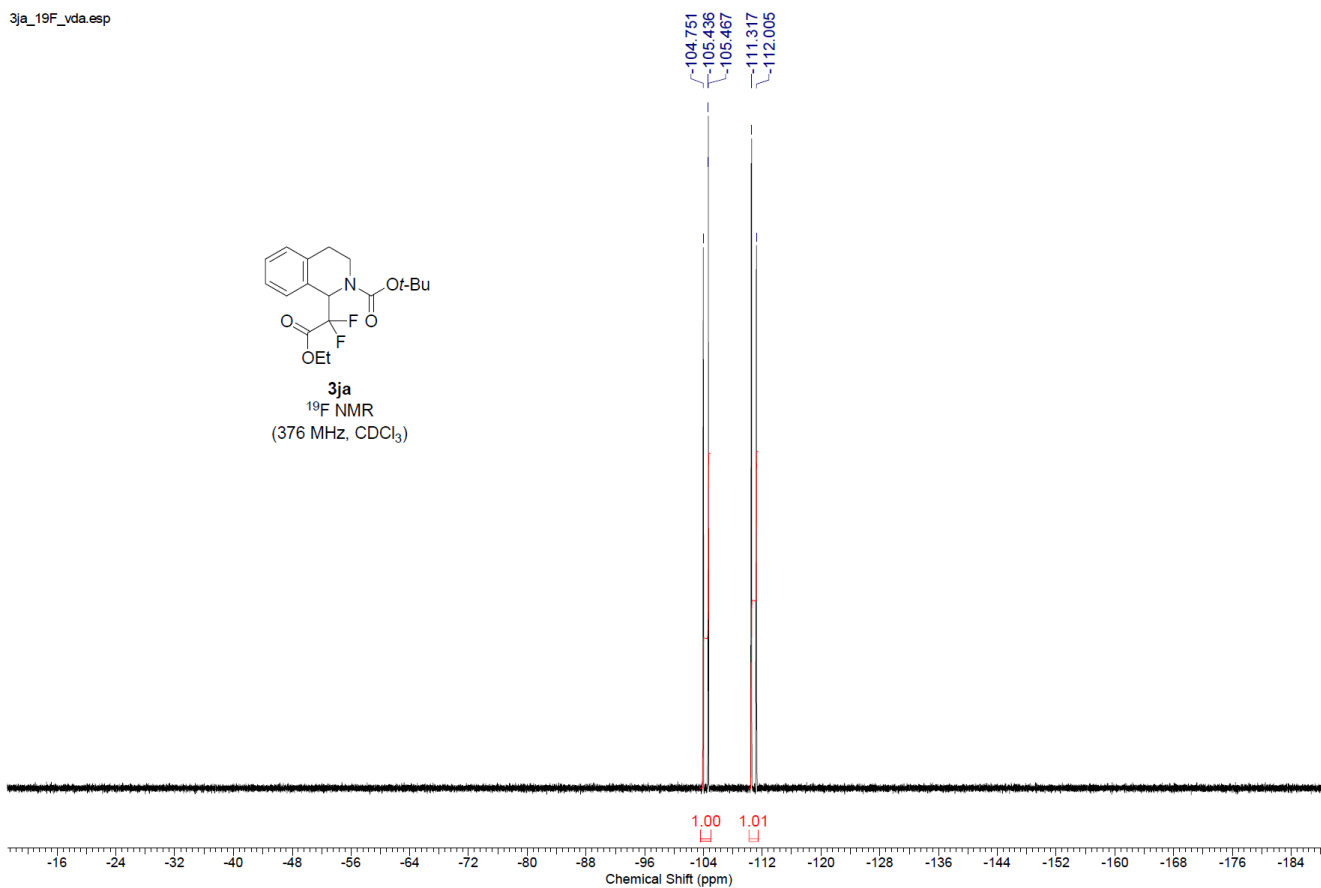

3ka\_1H\_vn.esp

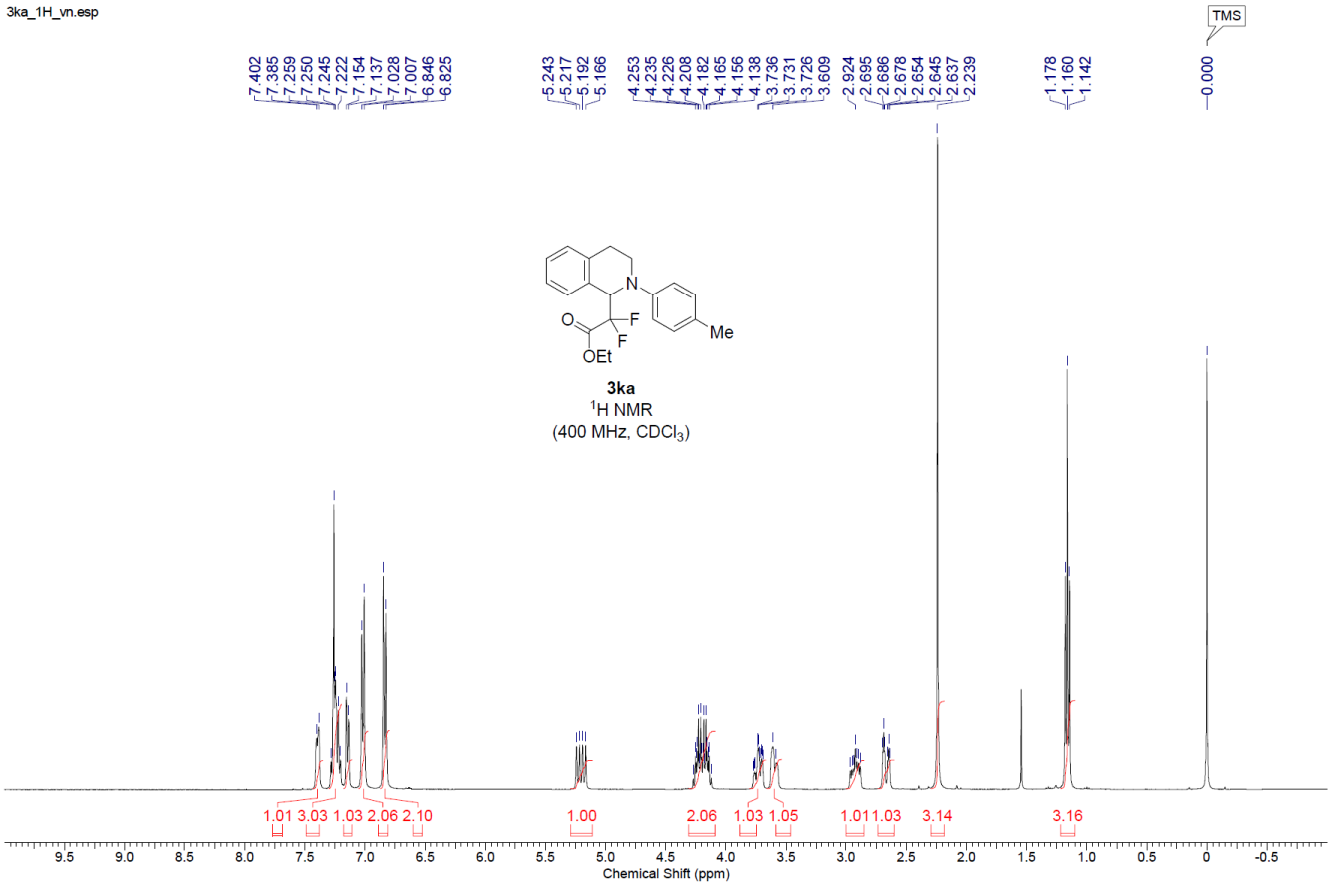

3ka\_13C\_vn.esp

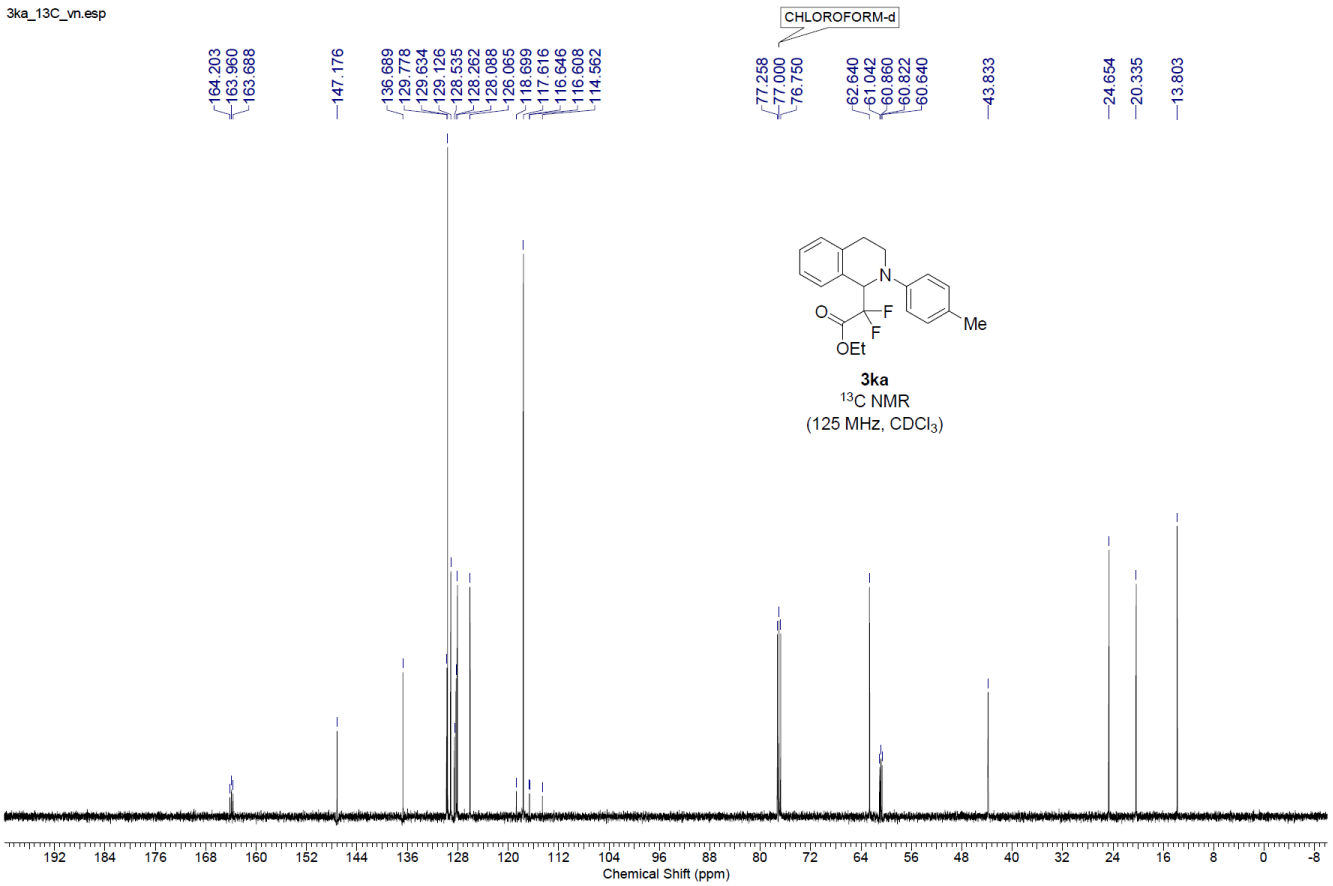



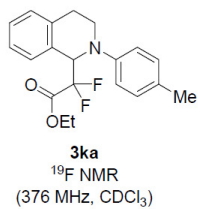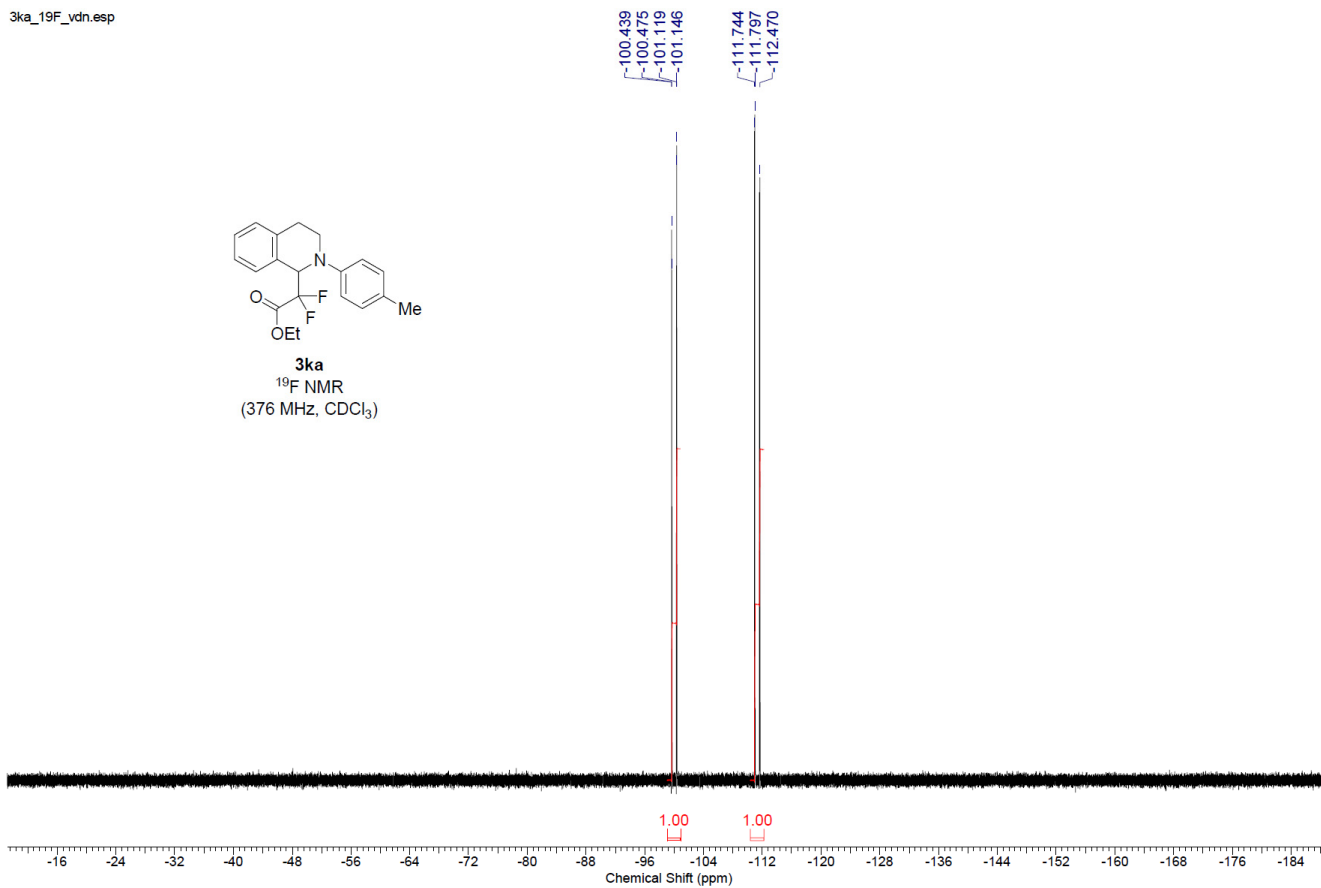

3la\_1H\_va.esp

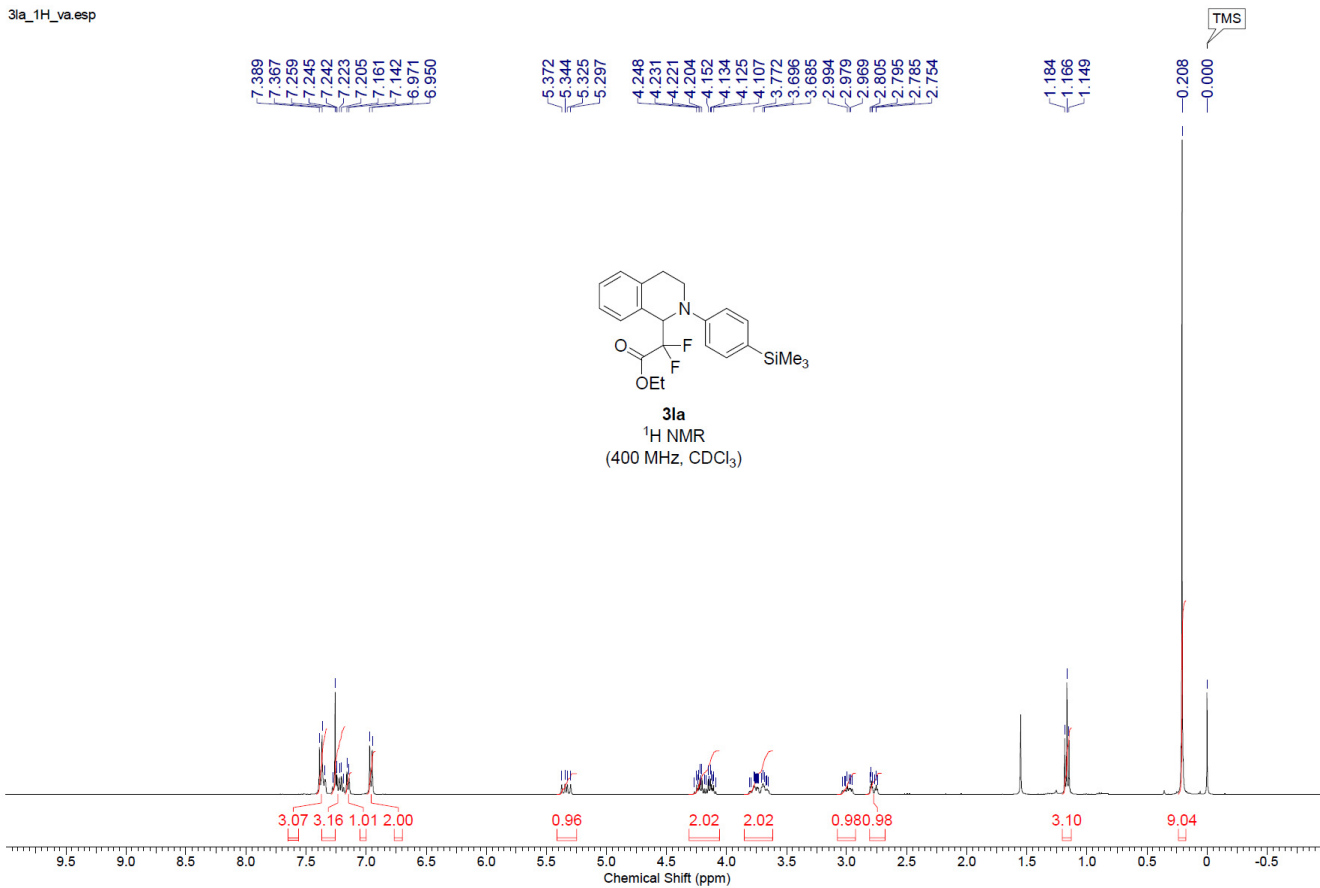

3la\_13C\_va.esp

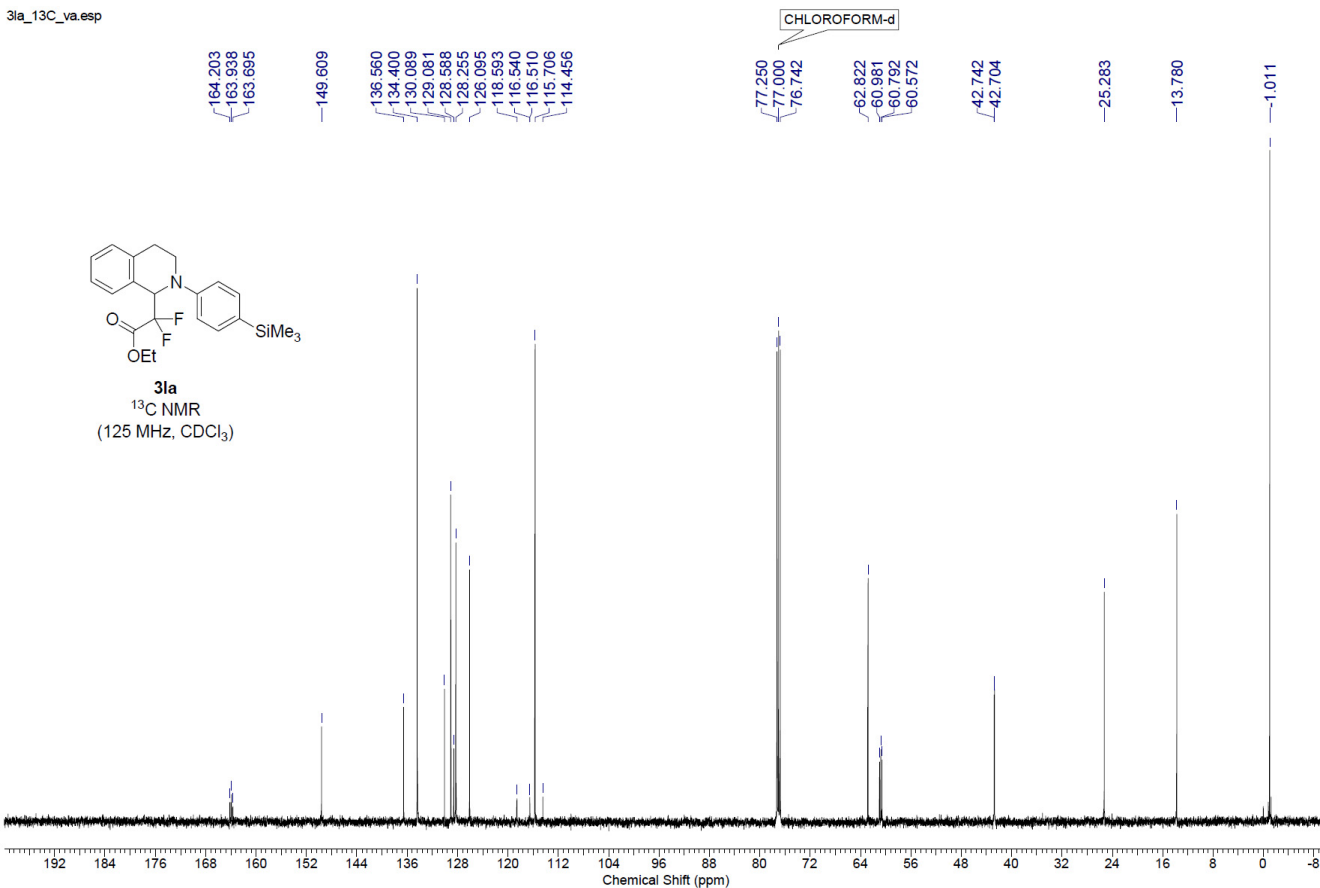

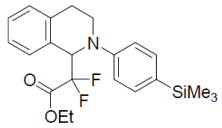

**3la**  
<sup>19</sup>F NMR  
(376 MHz, CDCl<sub>3</sub>)

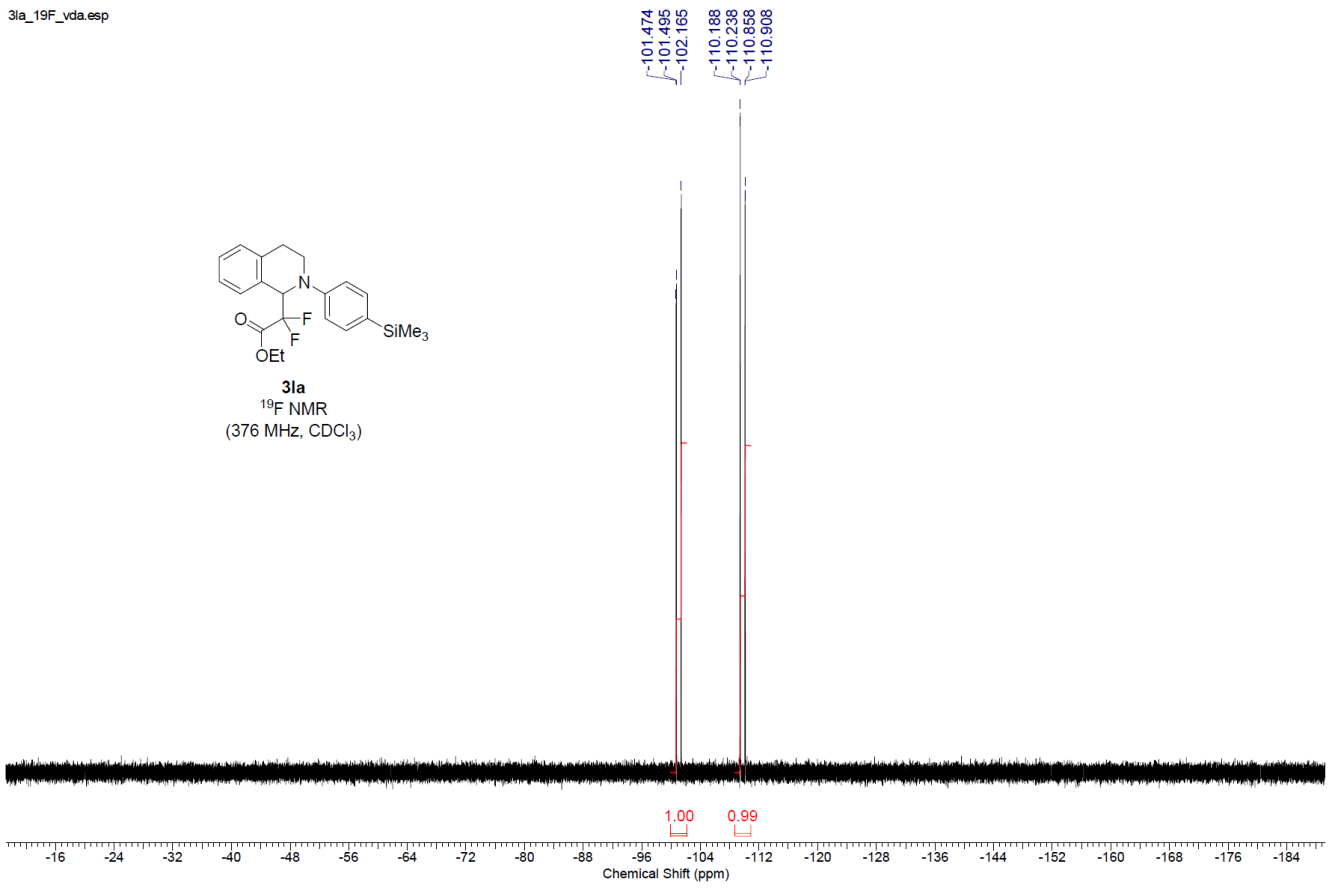

3ma\_1H\_vn.esp

TMS

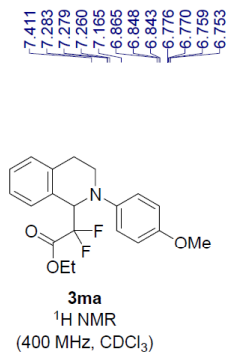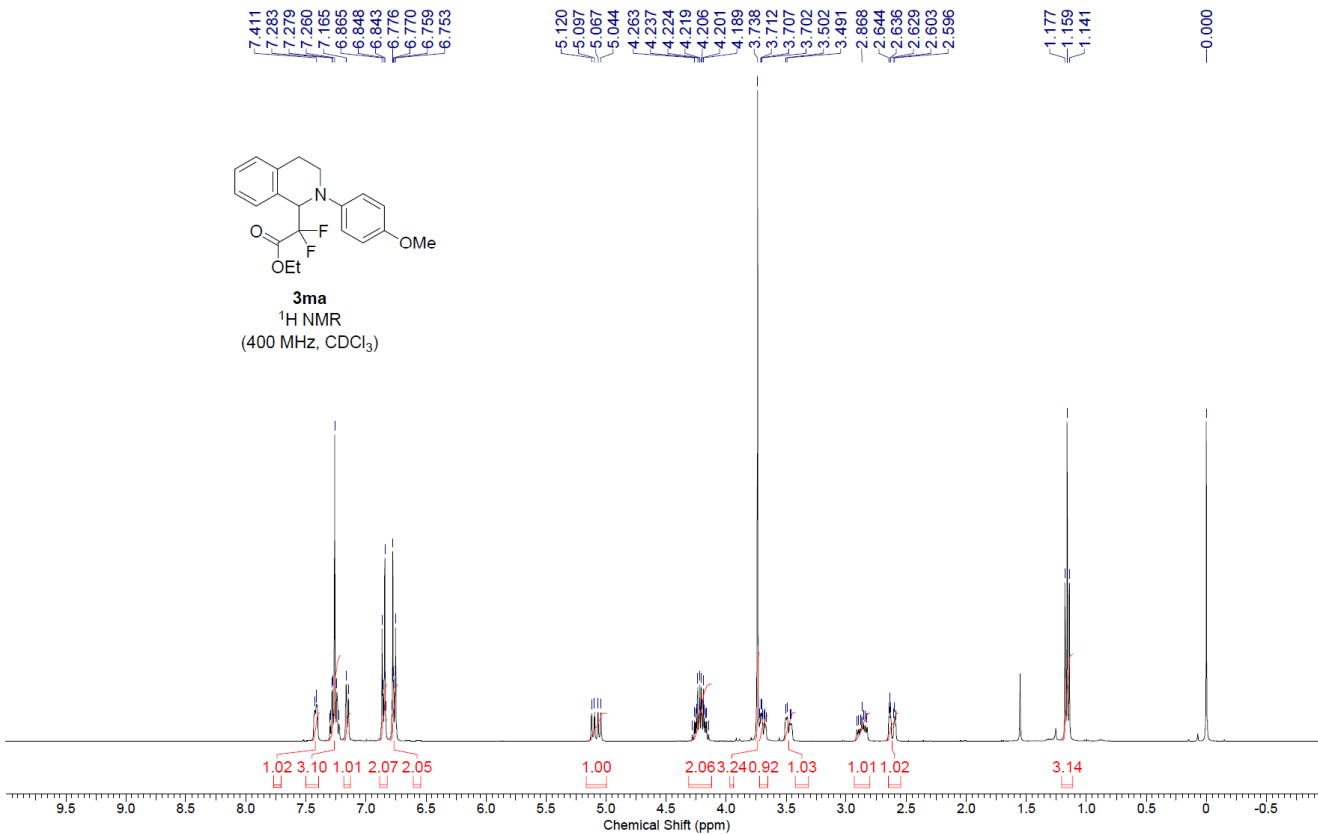

3ma\_13C\_vn.esp

CHLOROFORM-d

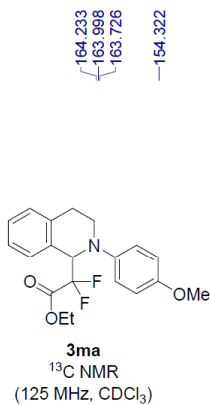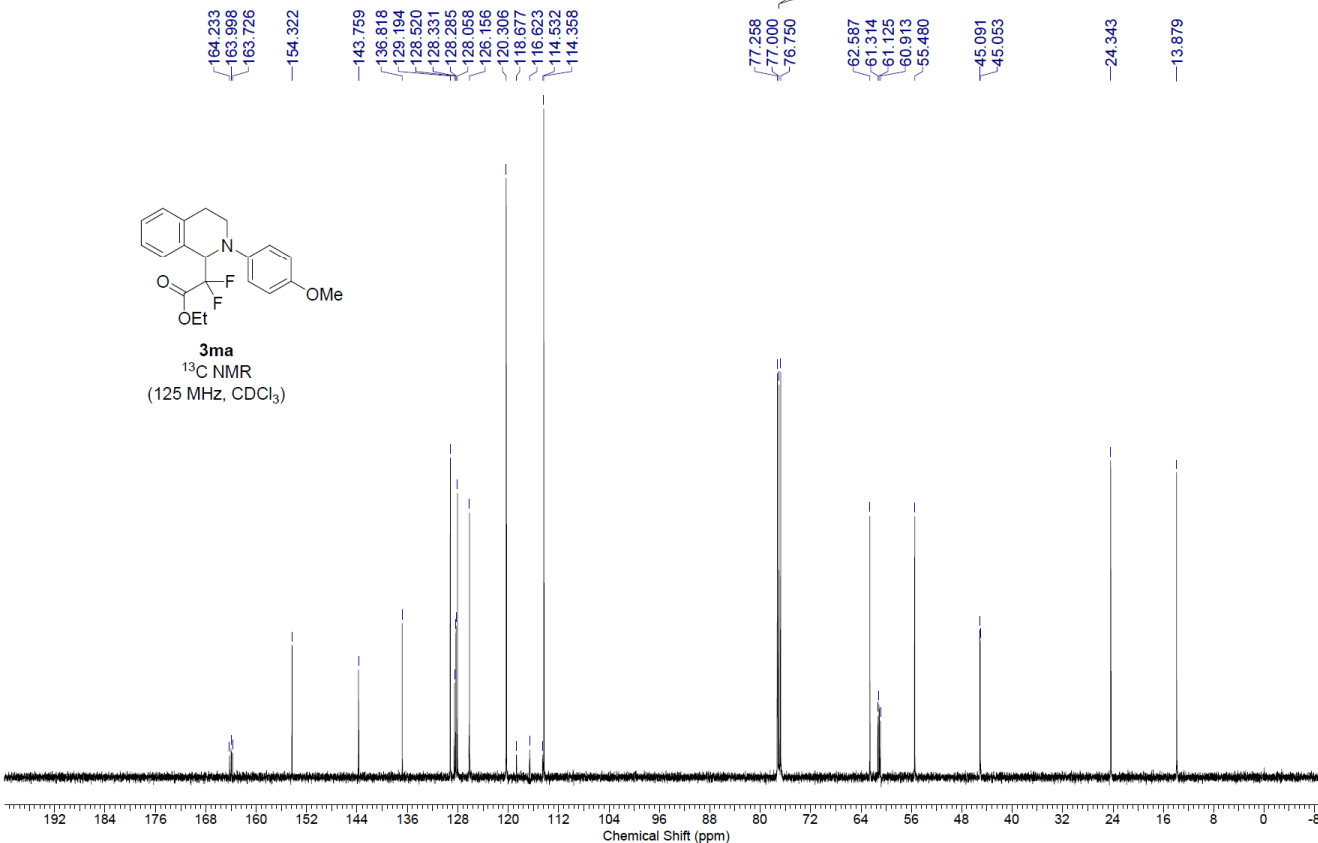

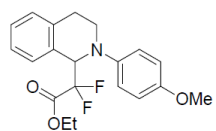

**3ma**  
<sup>19</sup>F NMR  
(376 MHz, CDCl<sub>3</sub>)

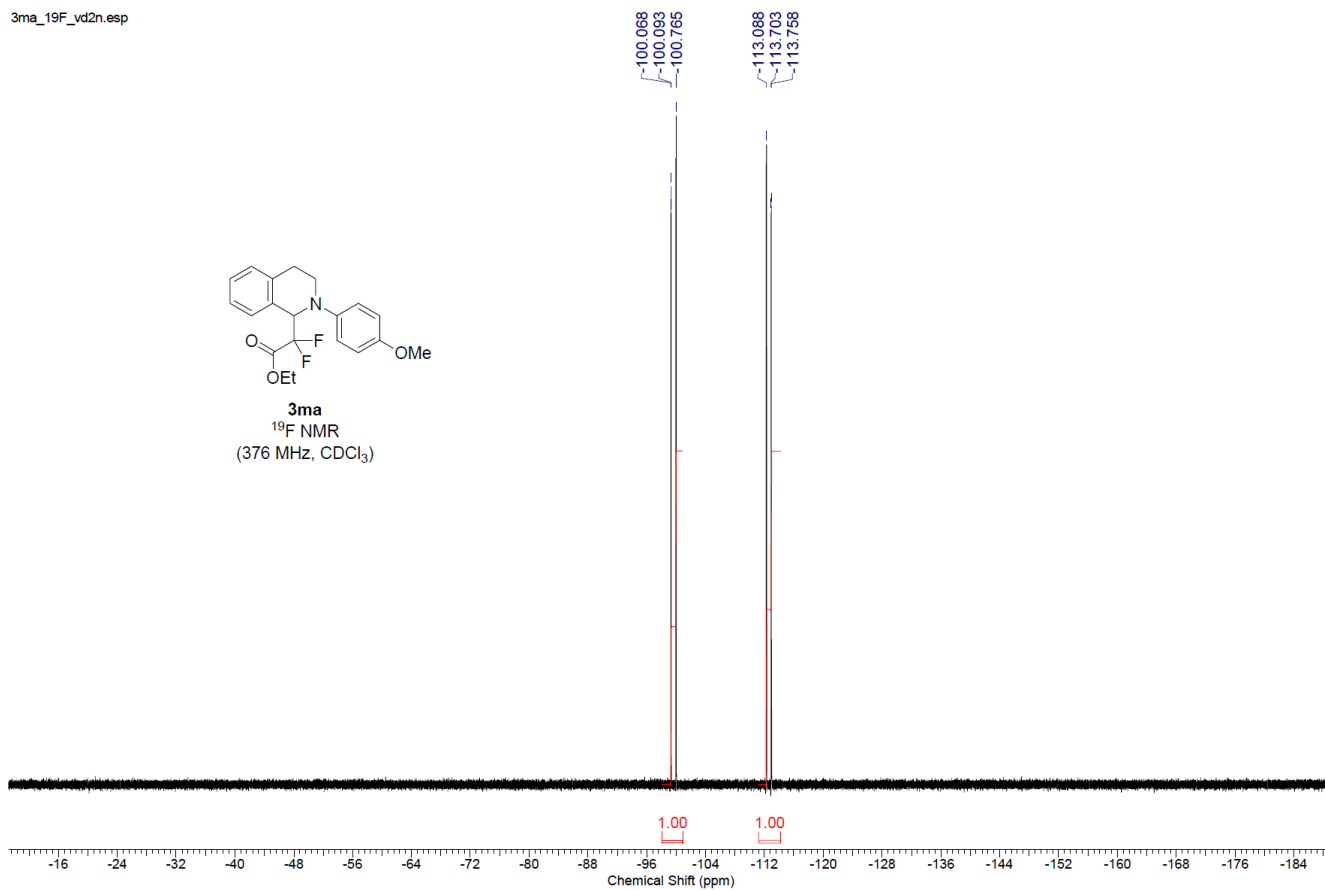

3na\_1H\_vn.esp

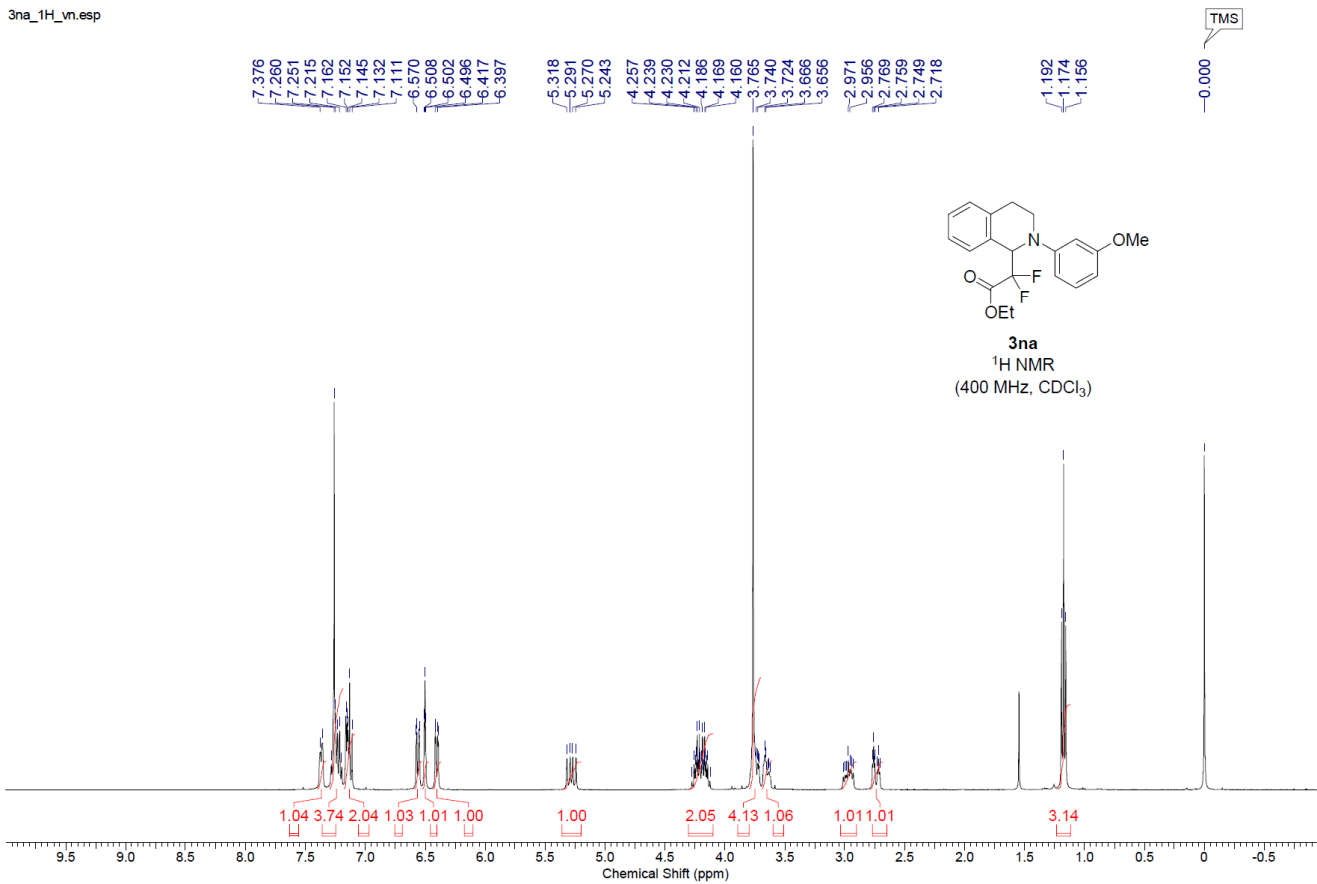

3na\_13C\_vn.esp

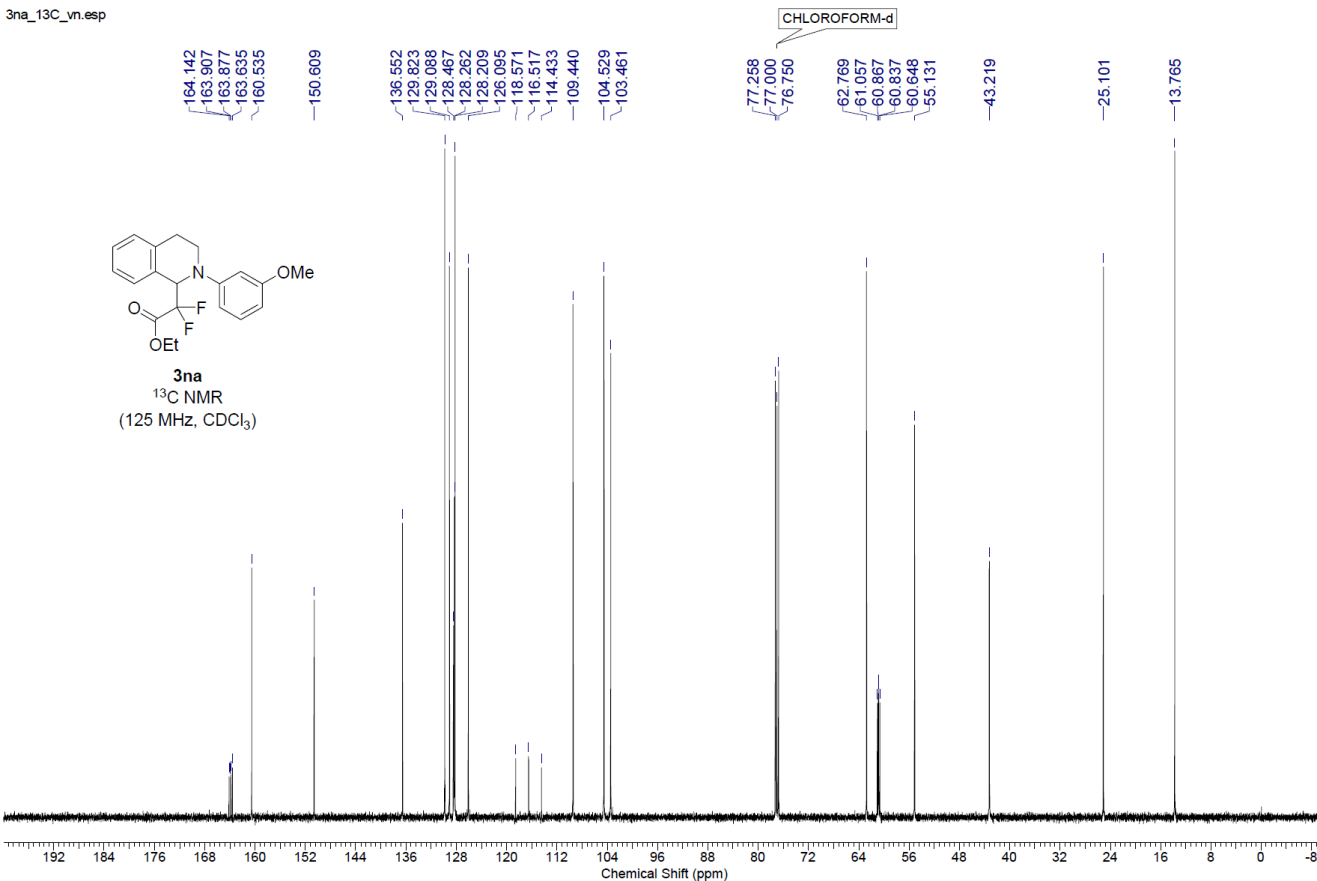

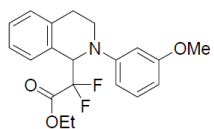

**3na**  
<sup>19</sup>F NMR  
(376 MHz, CDCl<sub>3</sub>)

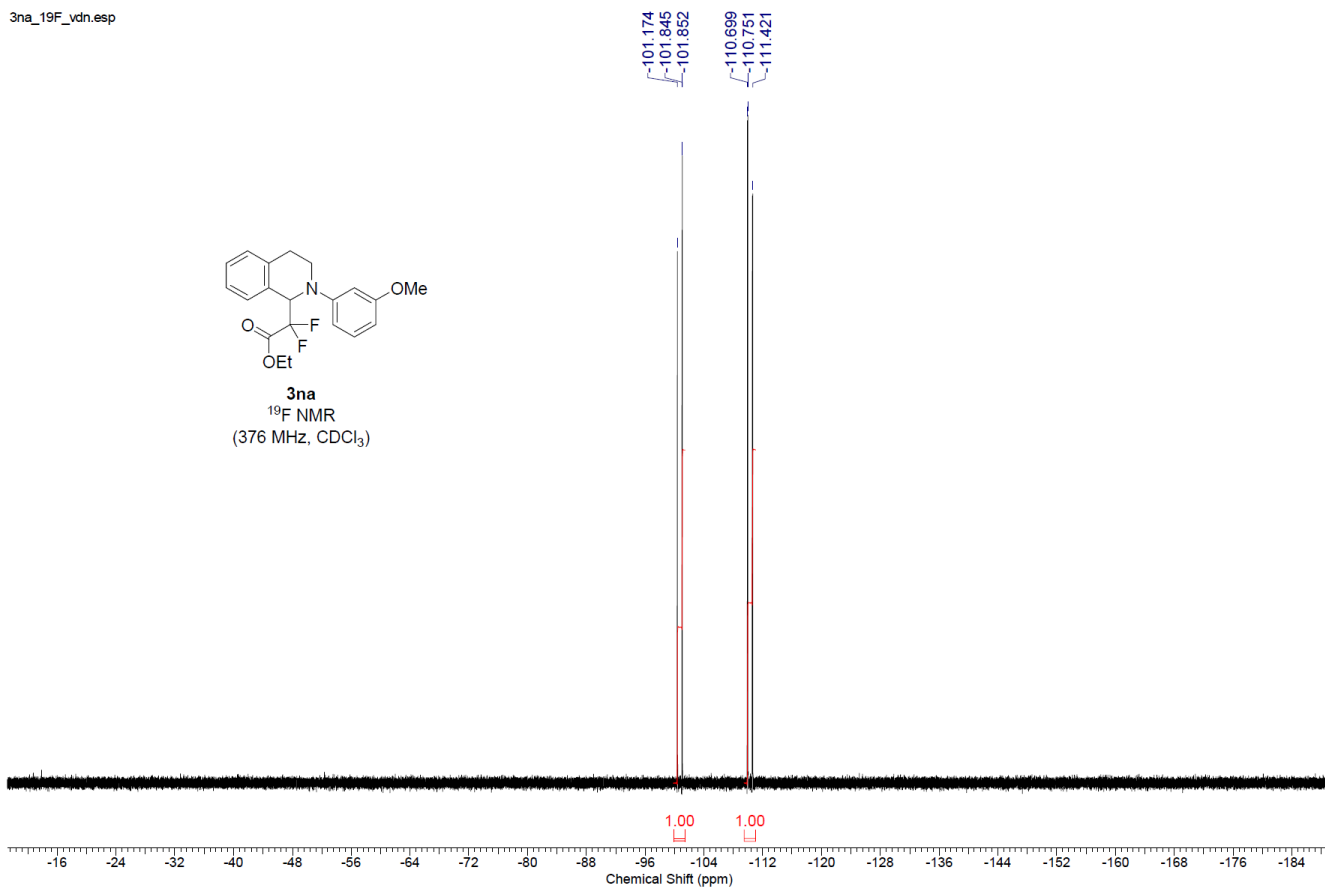

3oa\_1H\_vn.esp

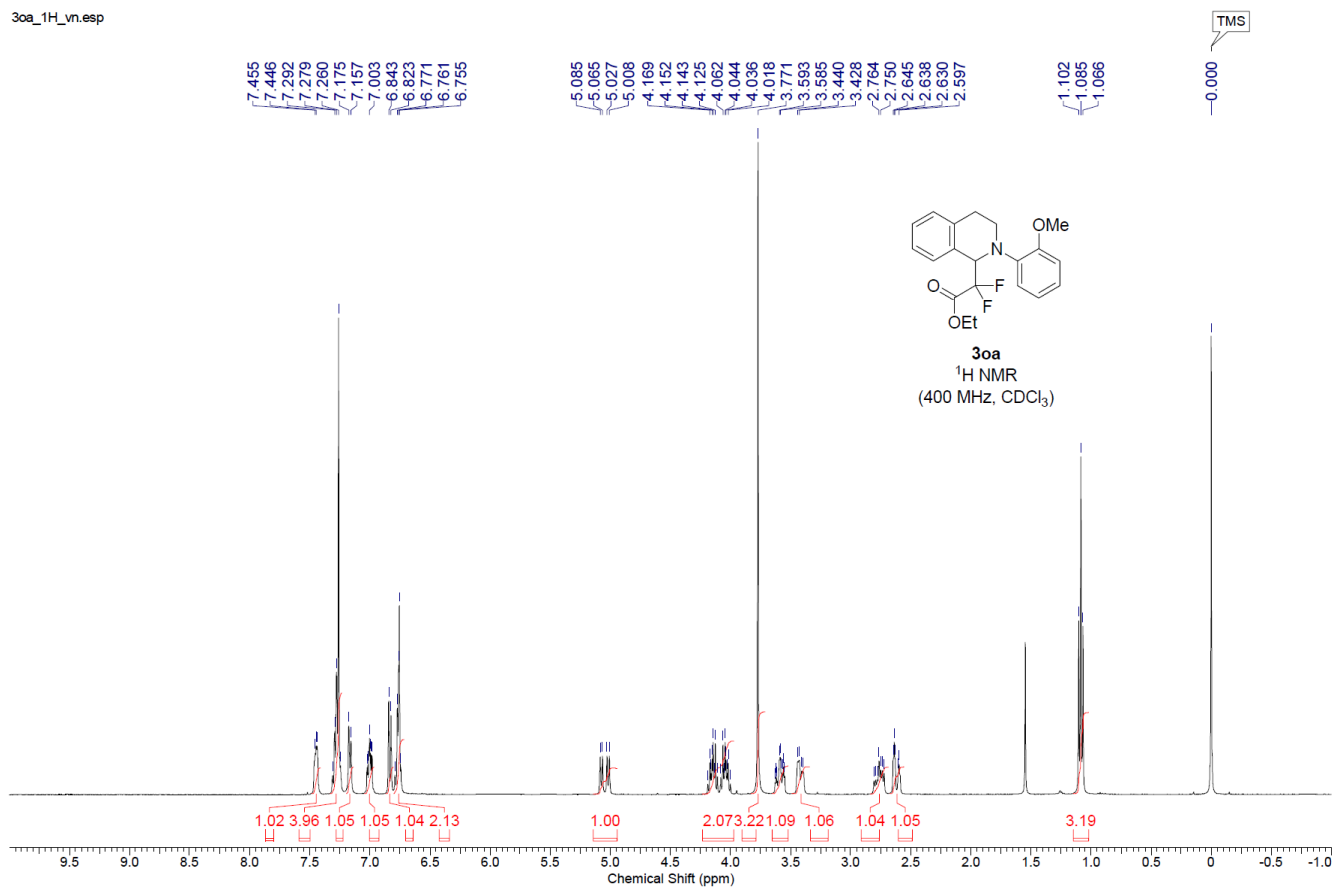

3oa\_13C\_v2n.esp

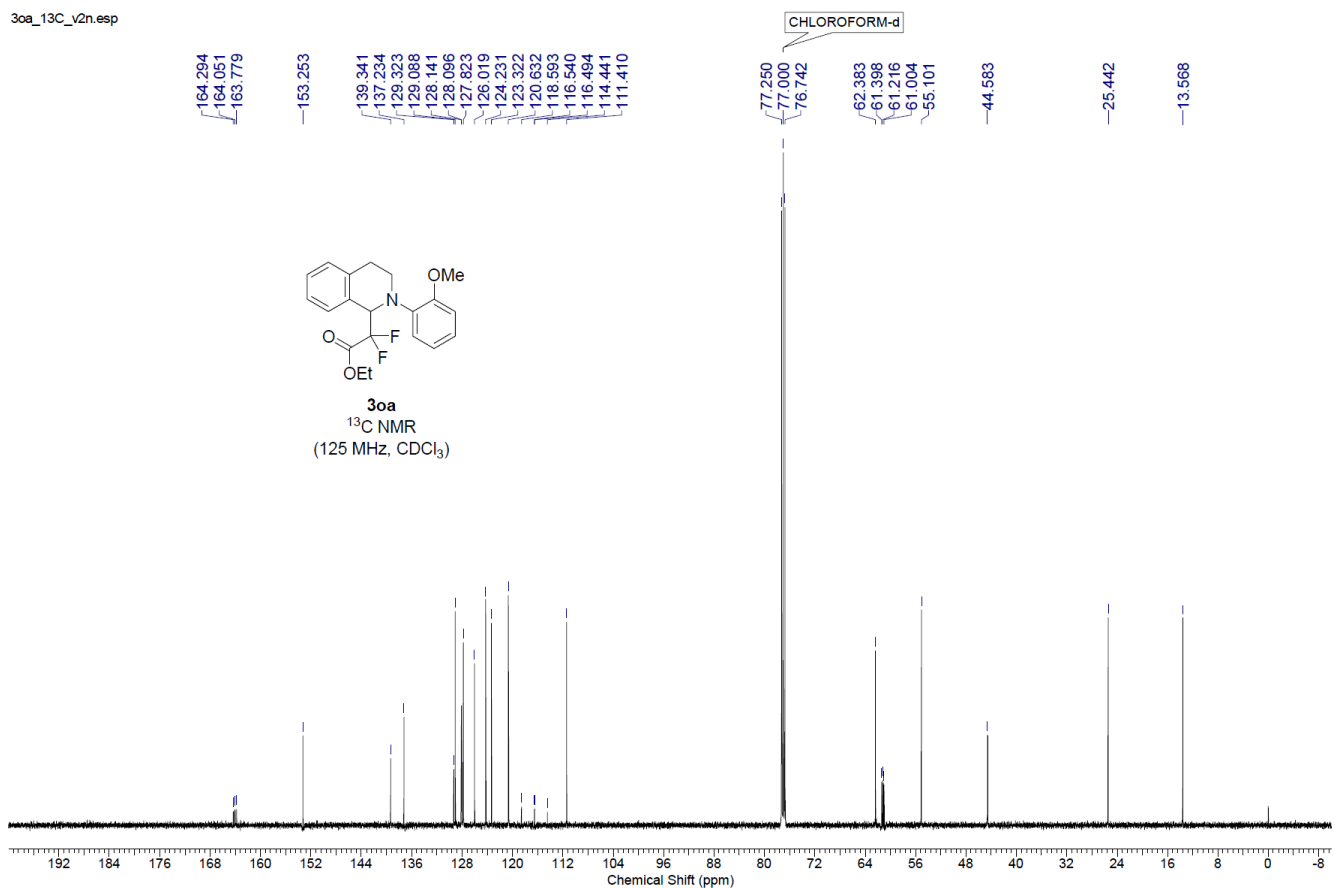



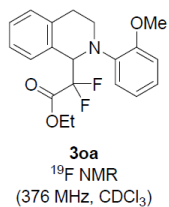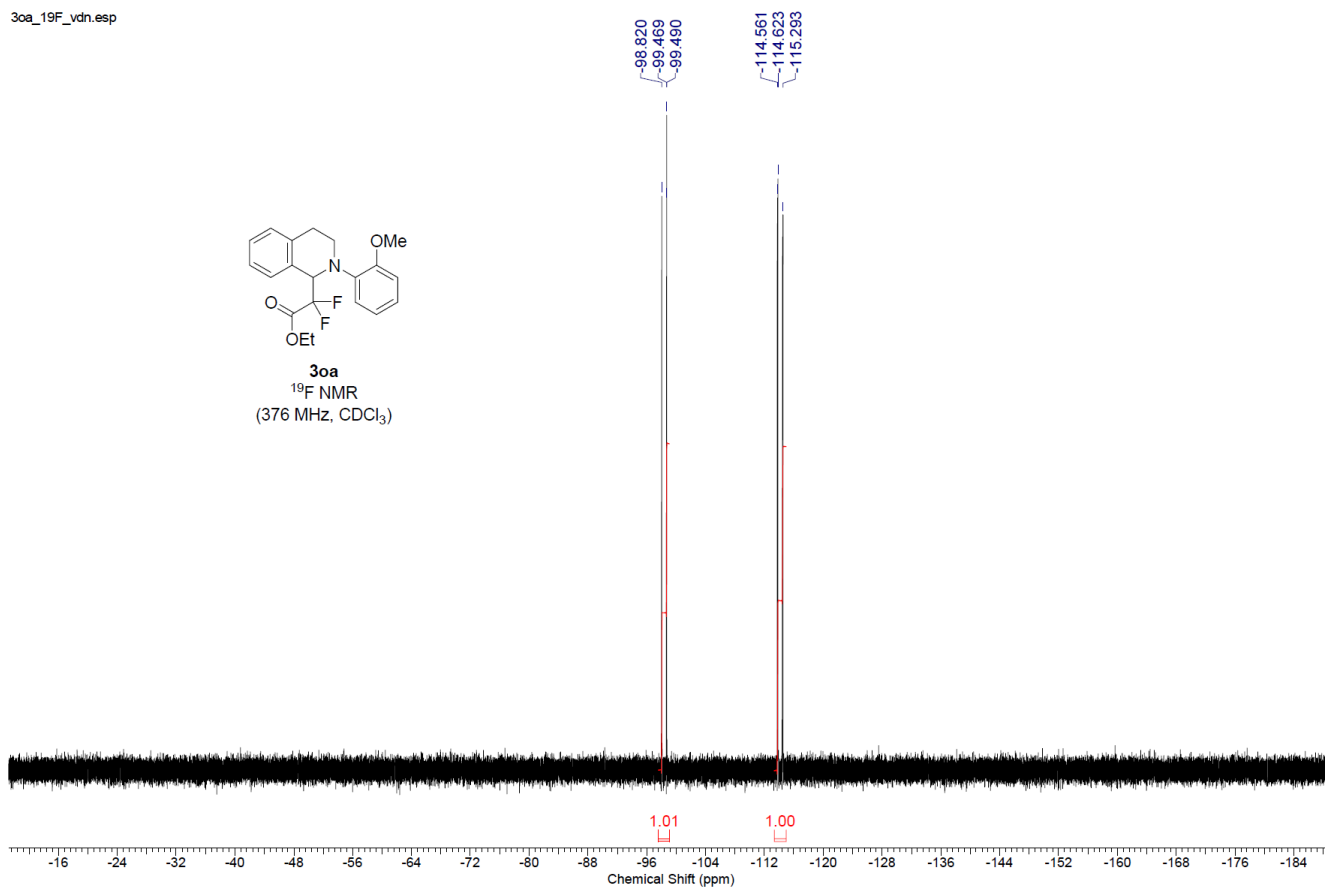

3pa\_1H\_vn.esp

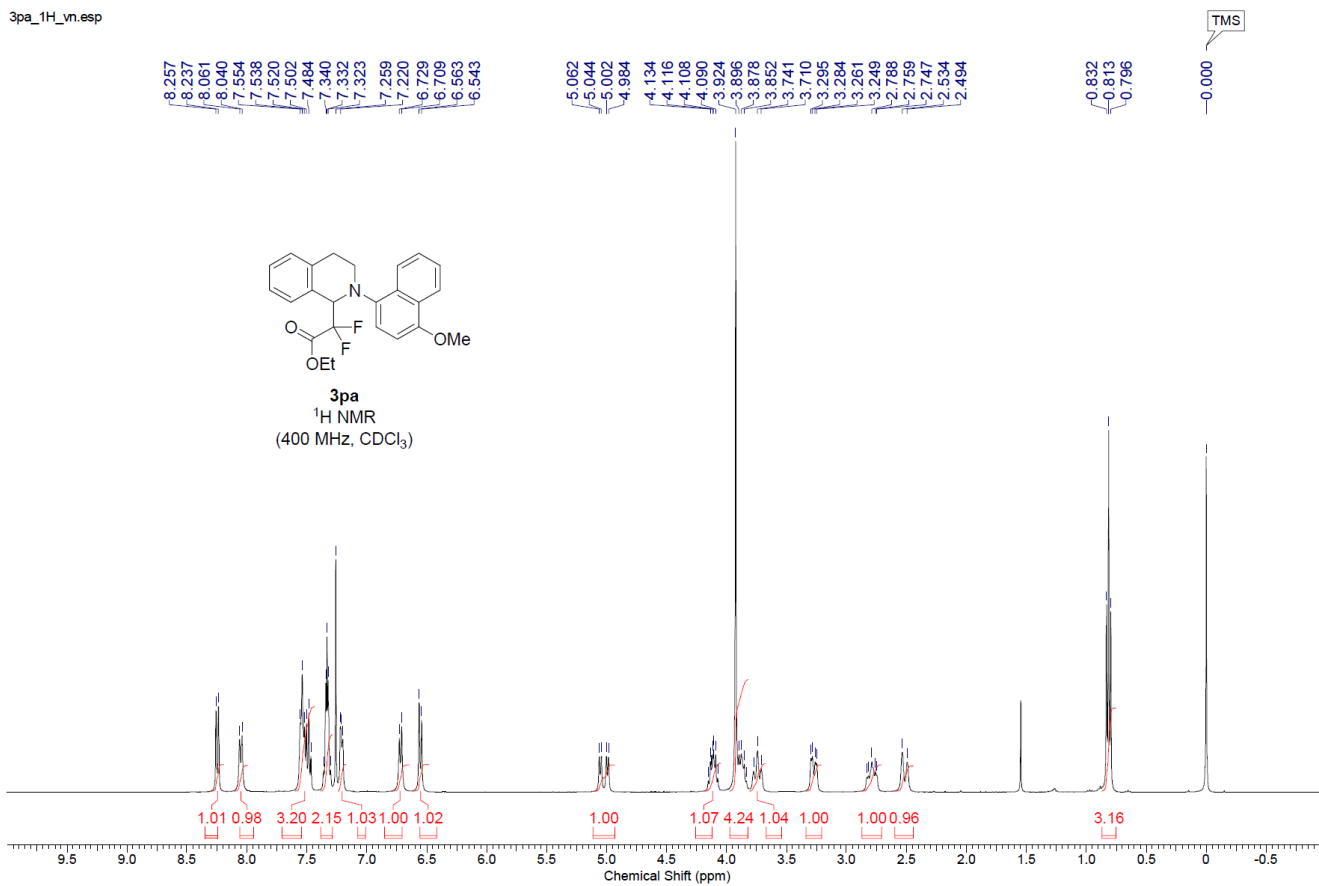

3pa\_13C\_vn.esp

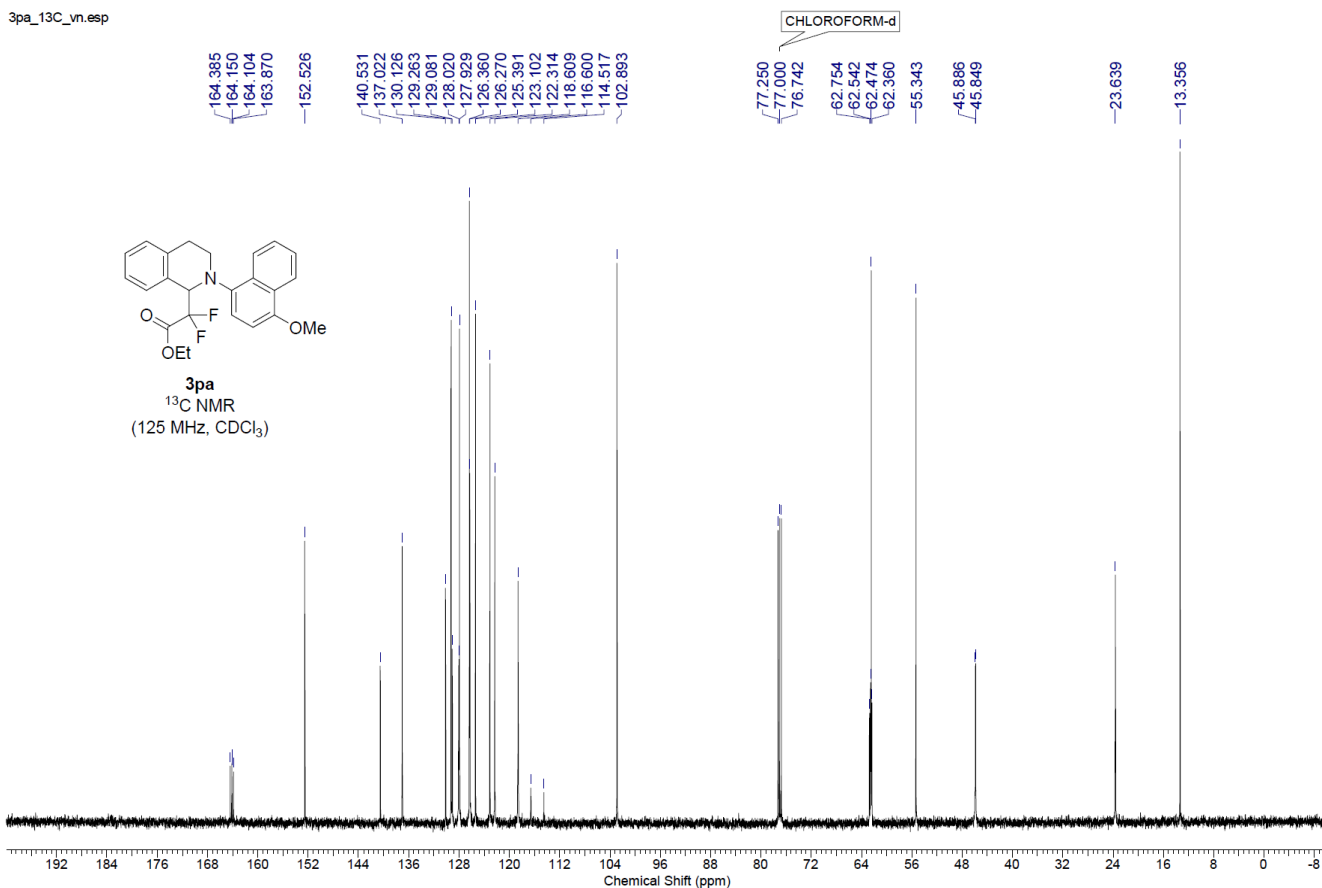

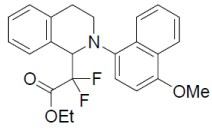

**3pa**  
<sup>19</sup>F NMR  
(376 MHz, CDCl<sub>3</sub>)

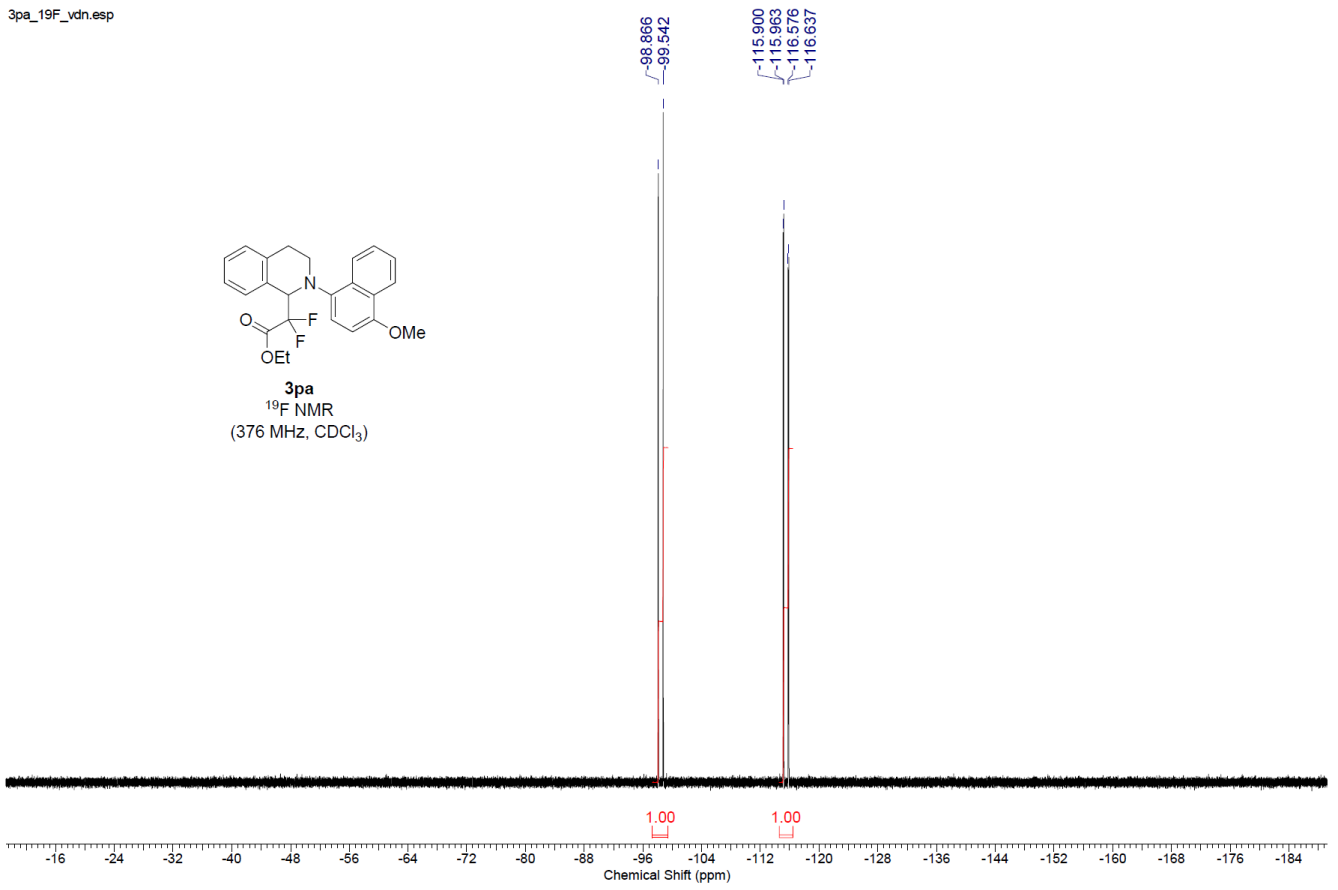

3qa\_1H\_vn.esp

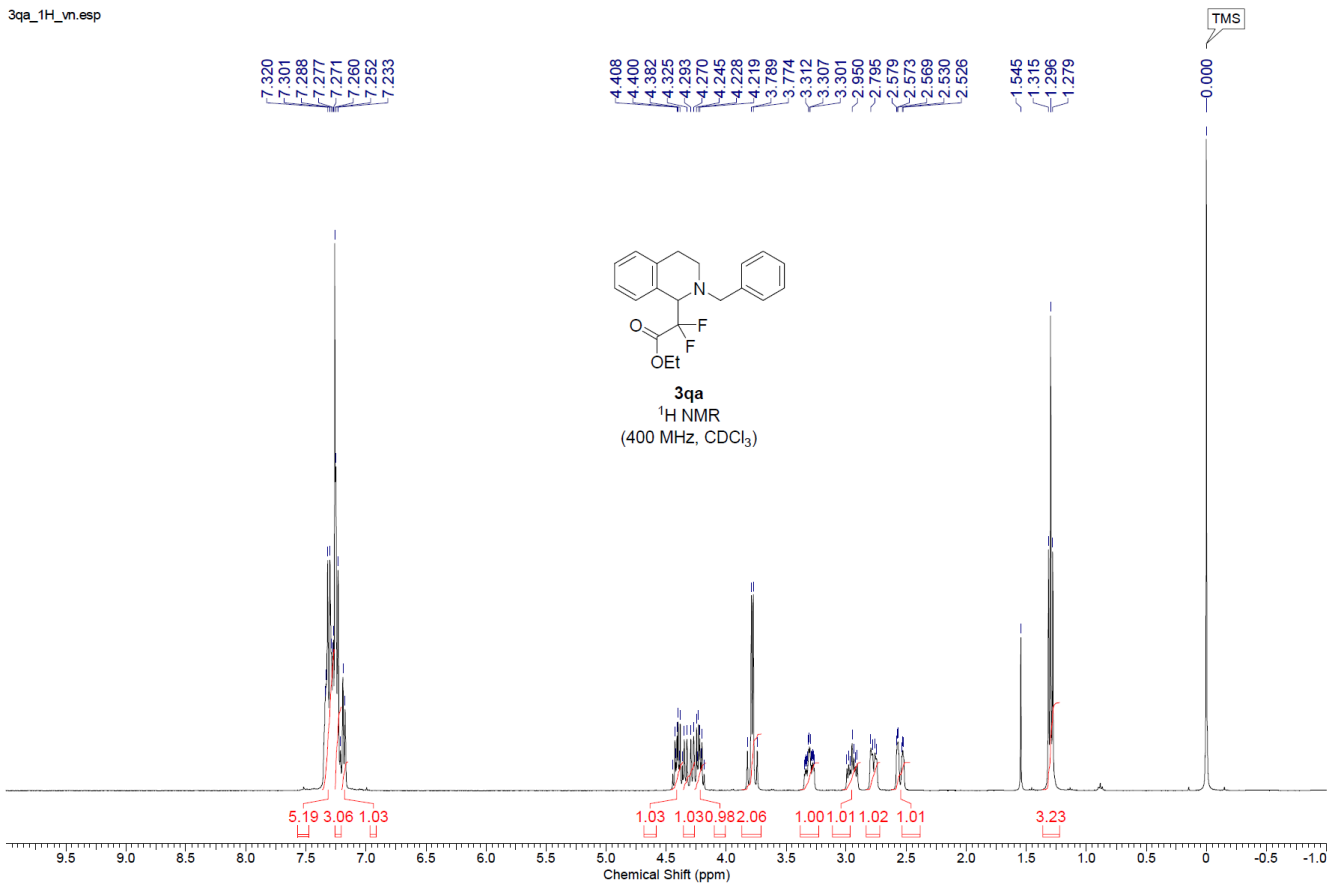

3qa\_13C\_vn.esp

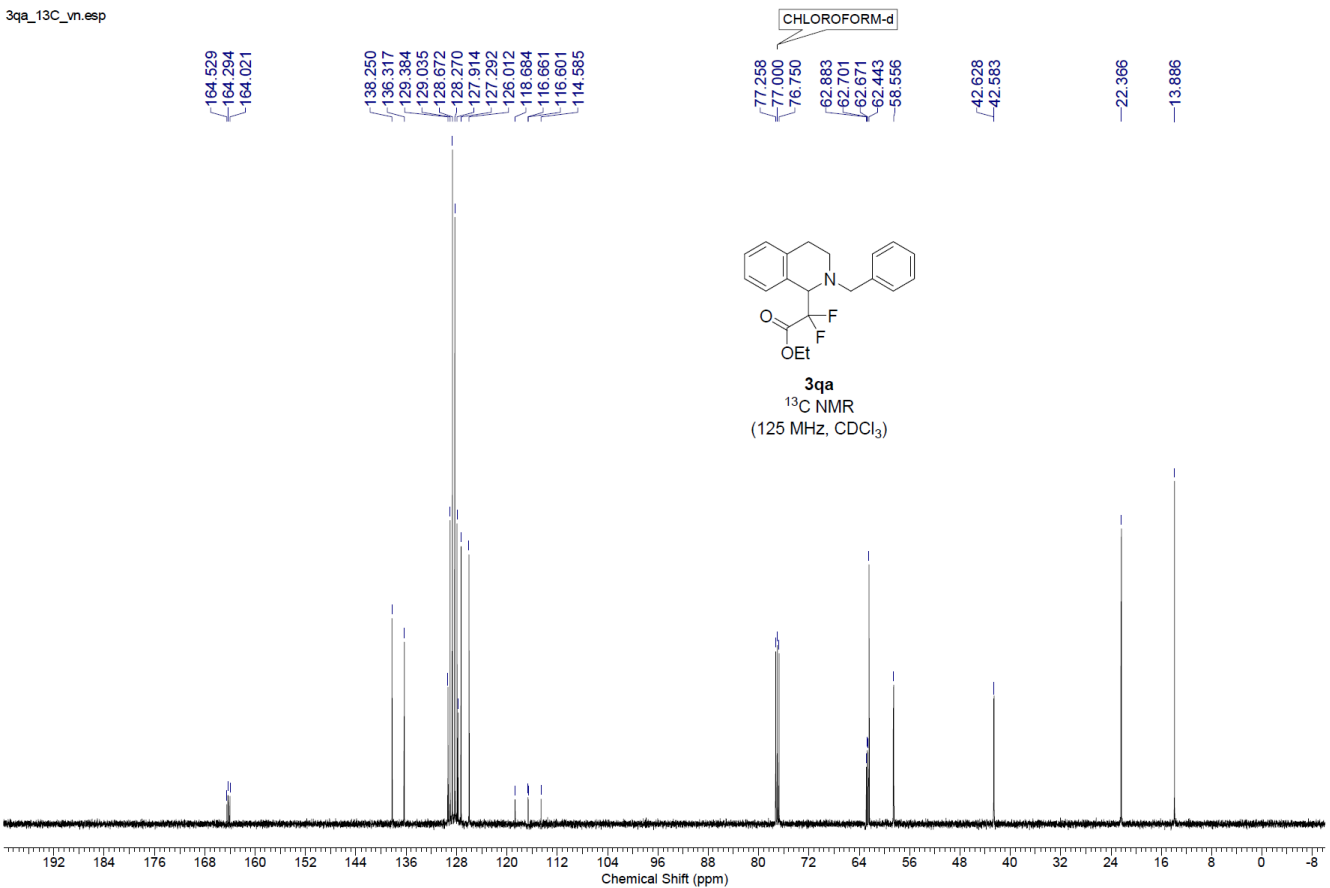

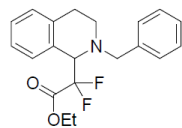

**3qa**  
<sup>19</sup>F NMR  
(376 MHz, CDCl<sub>3</sub>)

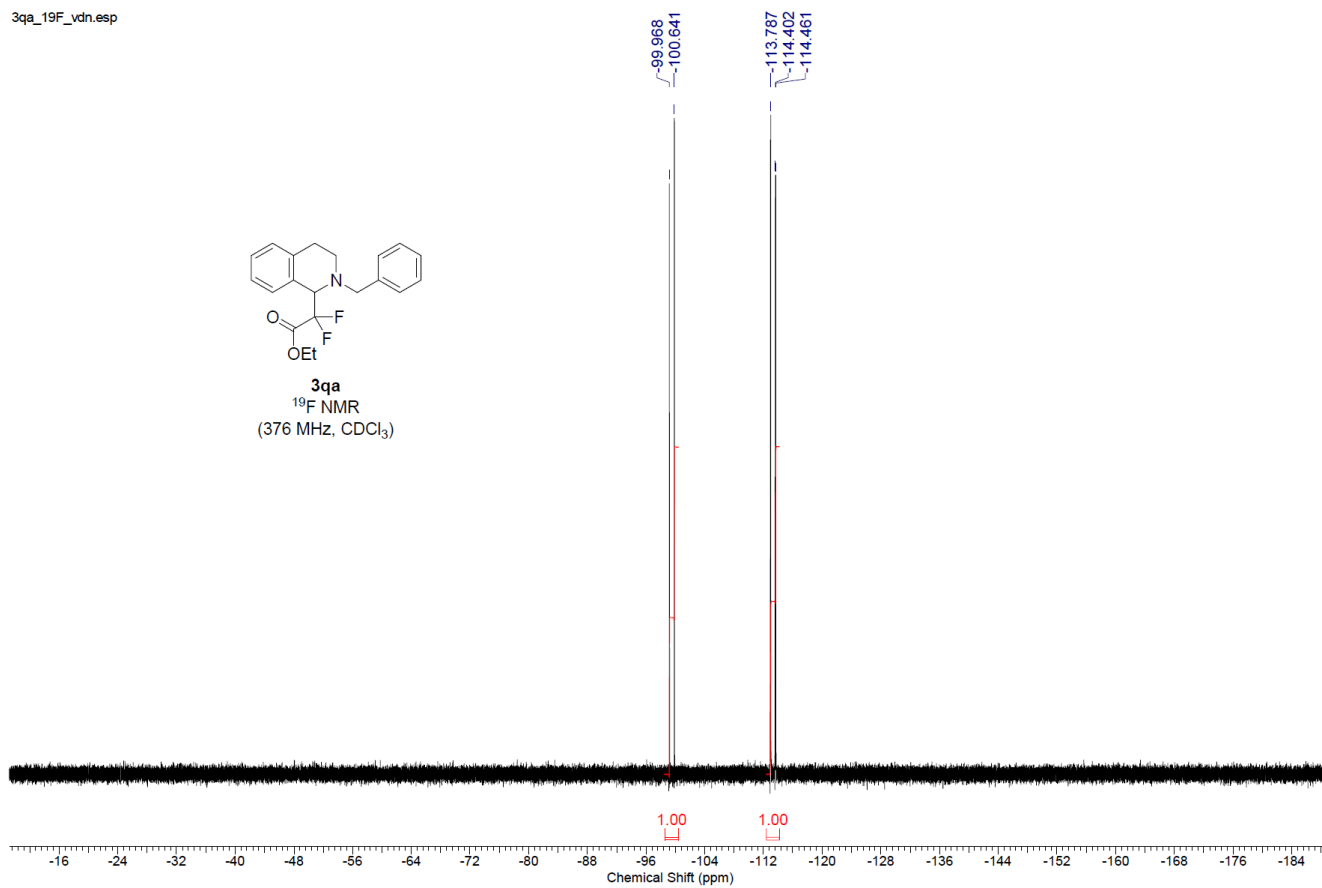

3ra\_1H\_vn.esp

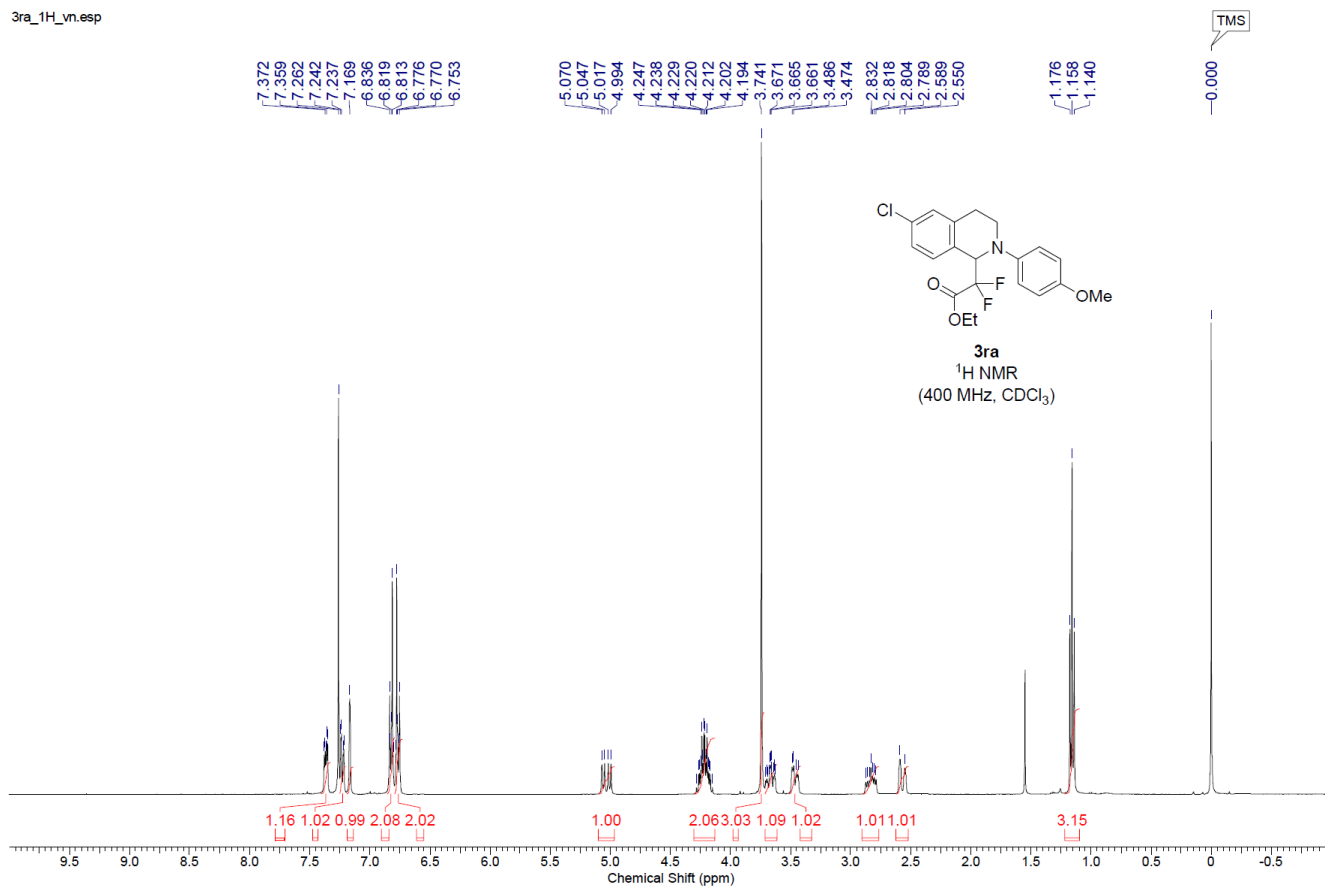

3ra\_13C\_v2n.esp

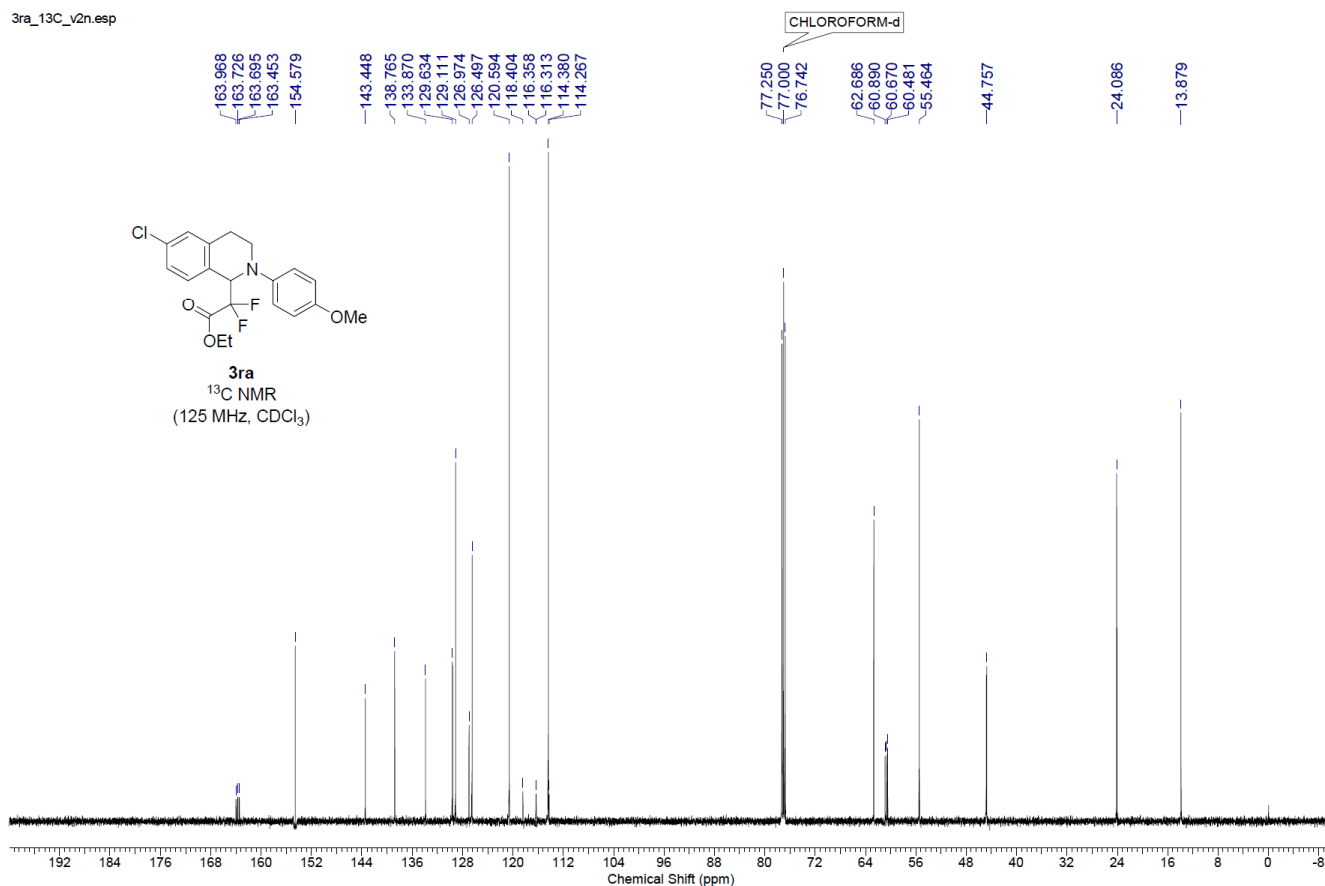

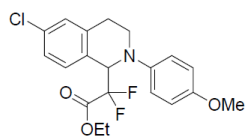

**3ra**  
<sup>19</sup>F NMR  
(376 MHz, CDCl<sub>3</sub>)

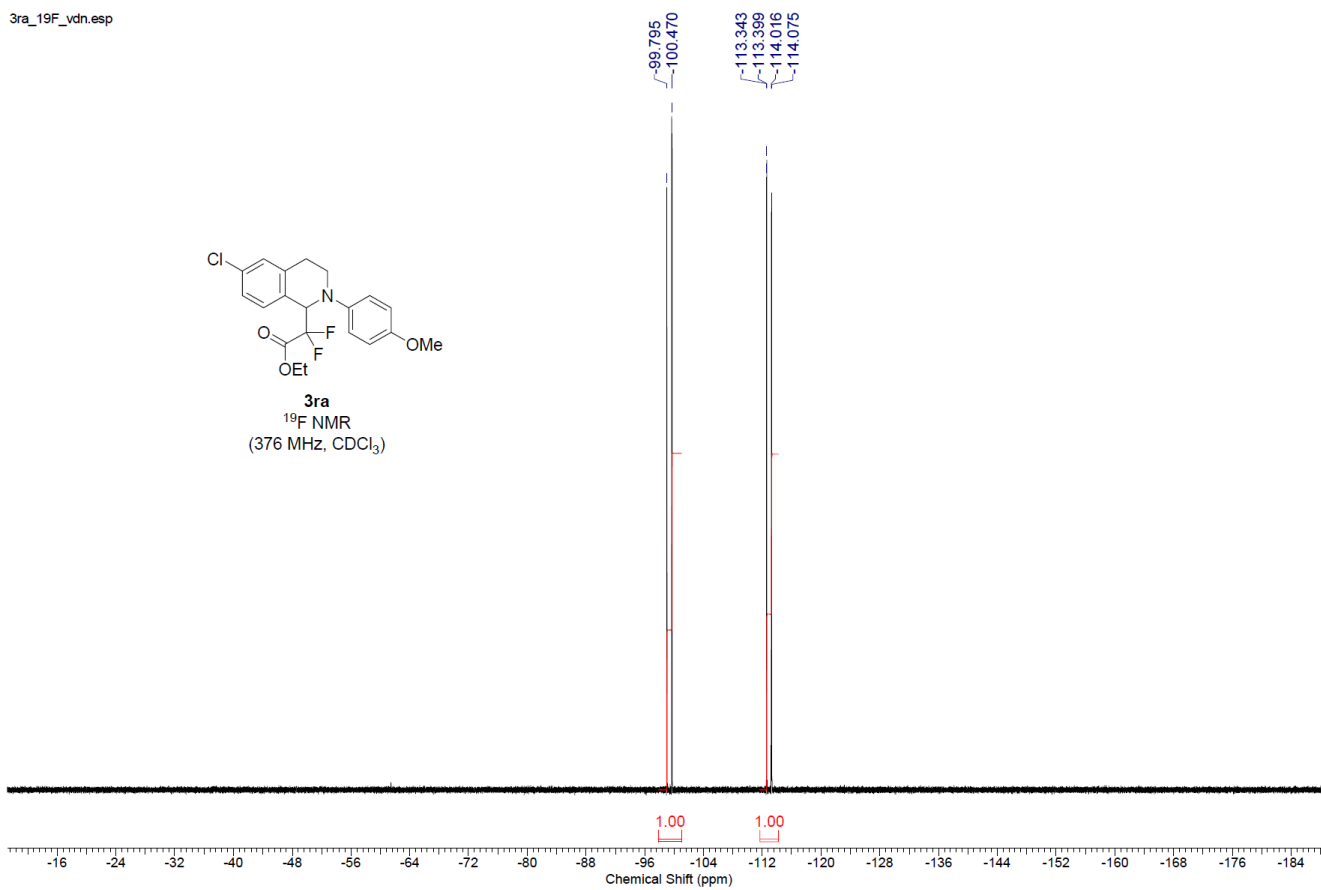

3sa\_1H\_vn.esp

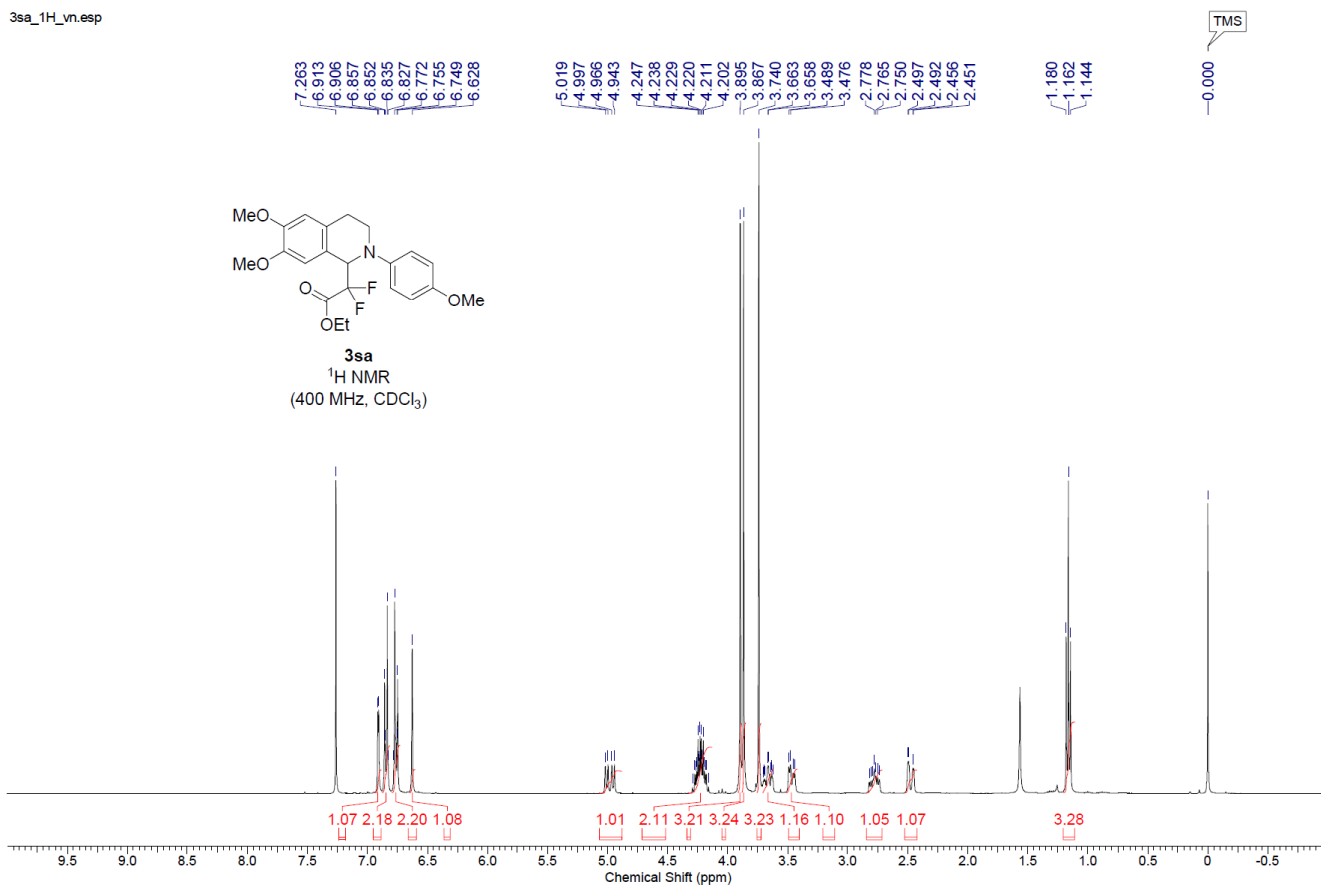

3sa\_13C\_vn.esp

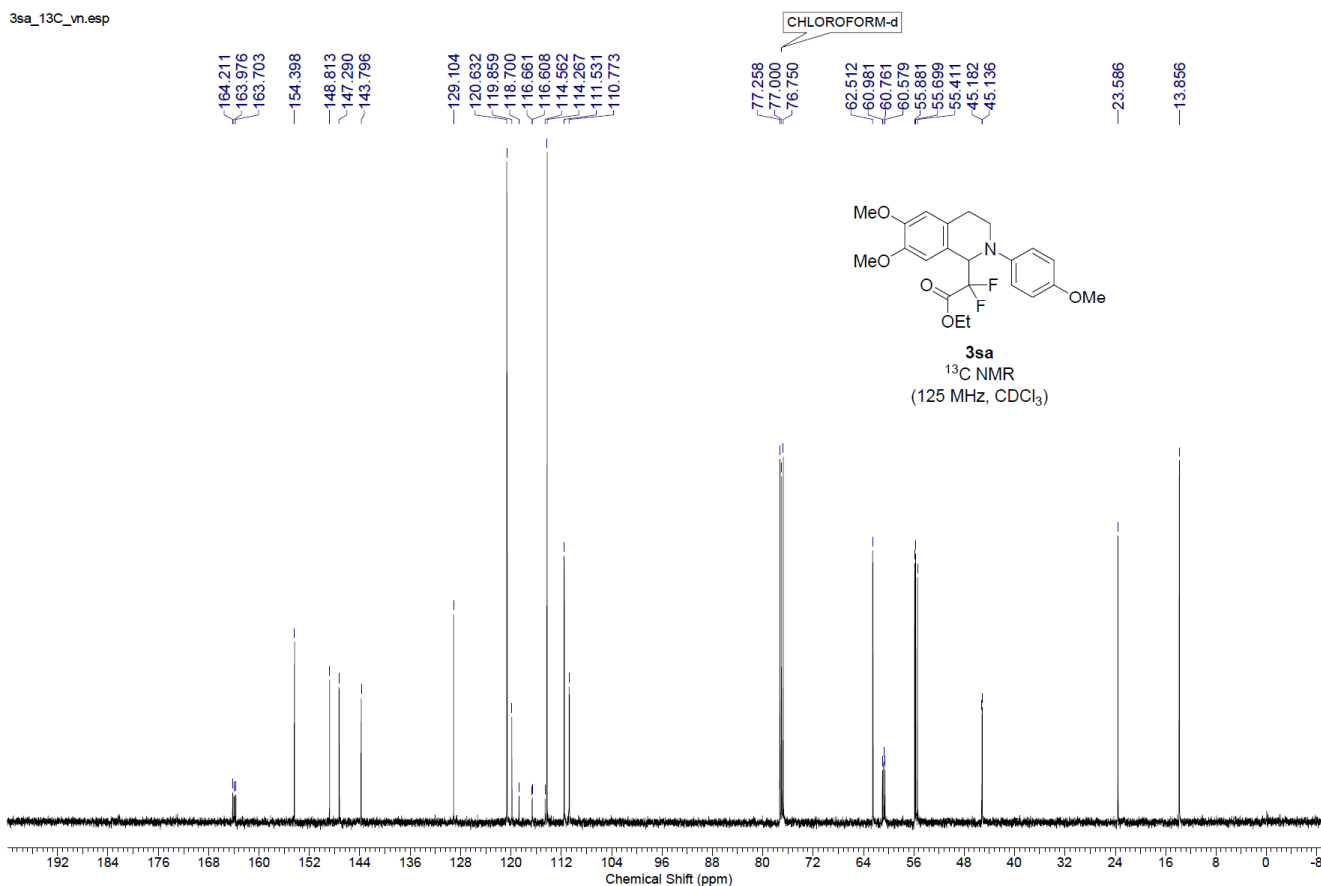



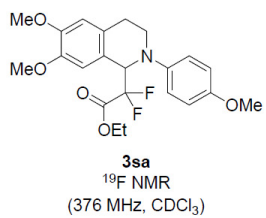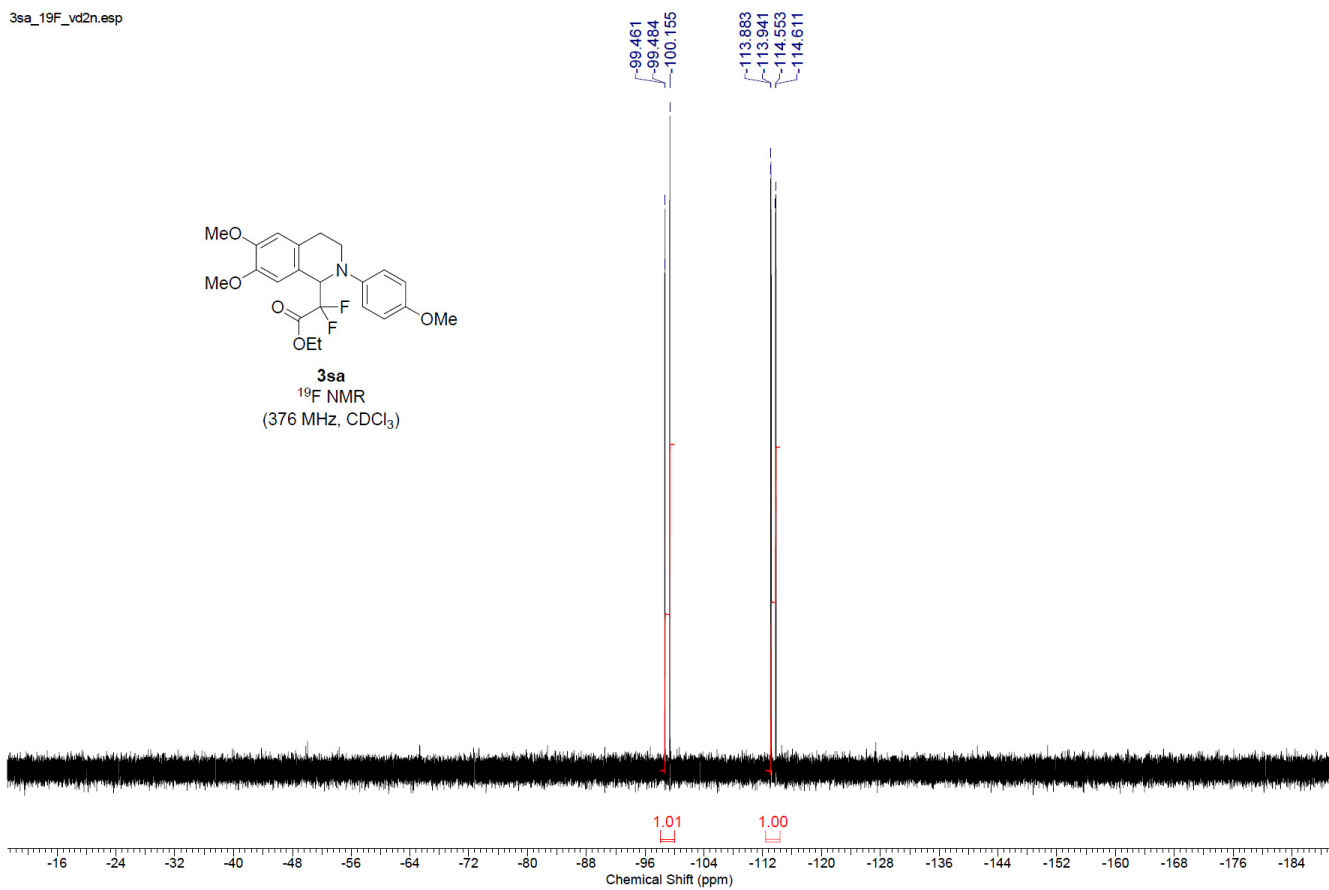

3ab\_1H\_v3.esp

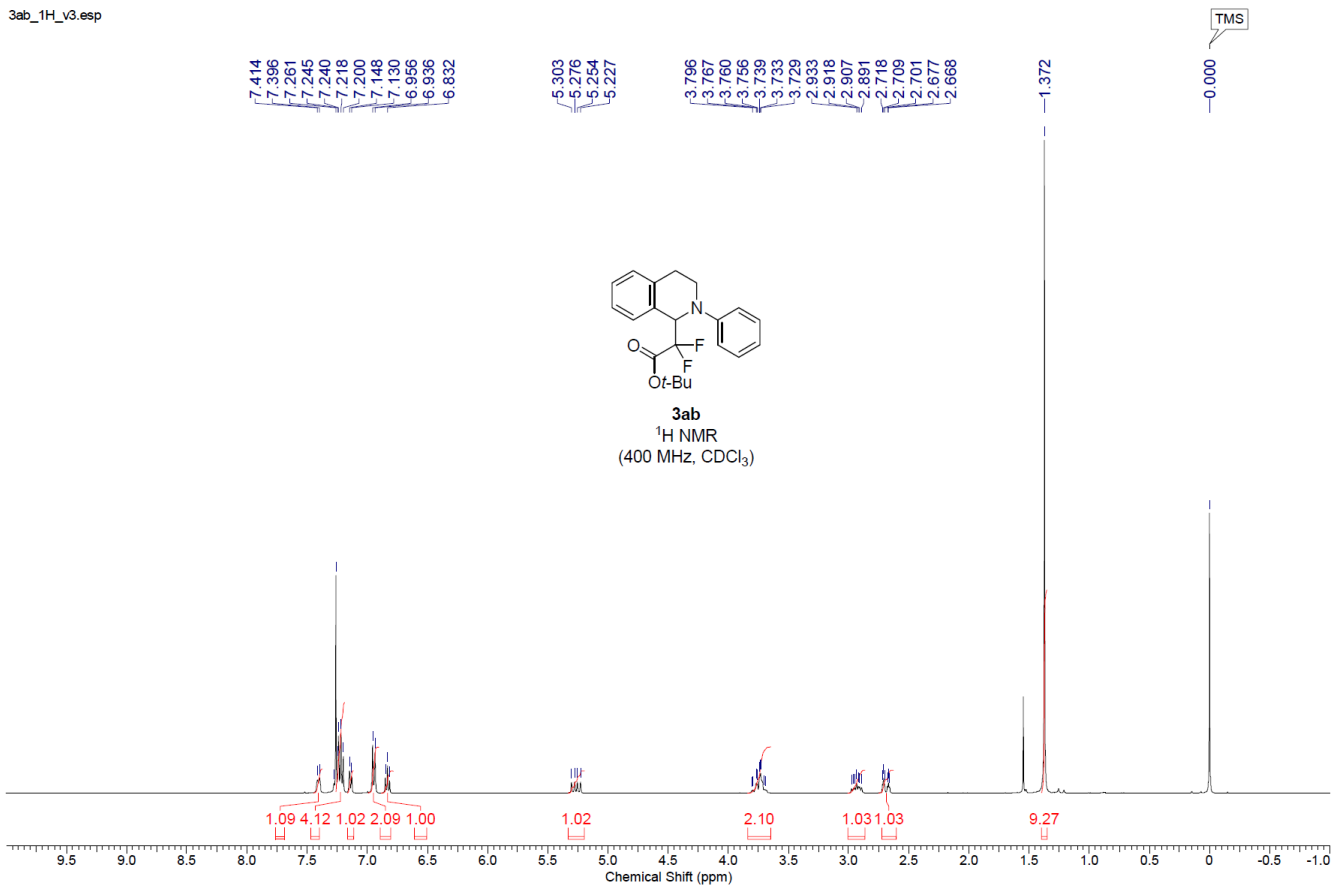

3ab\_13C.esp

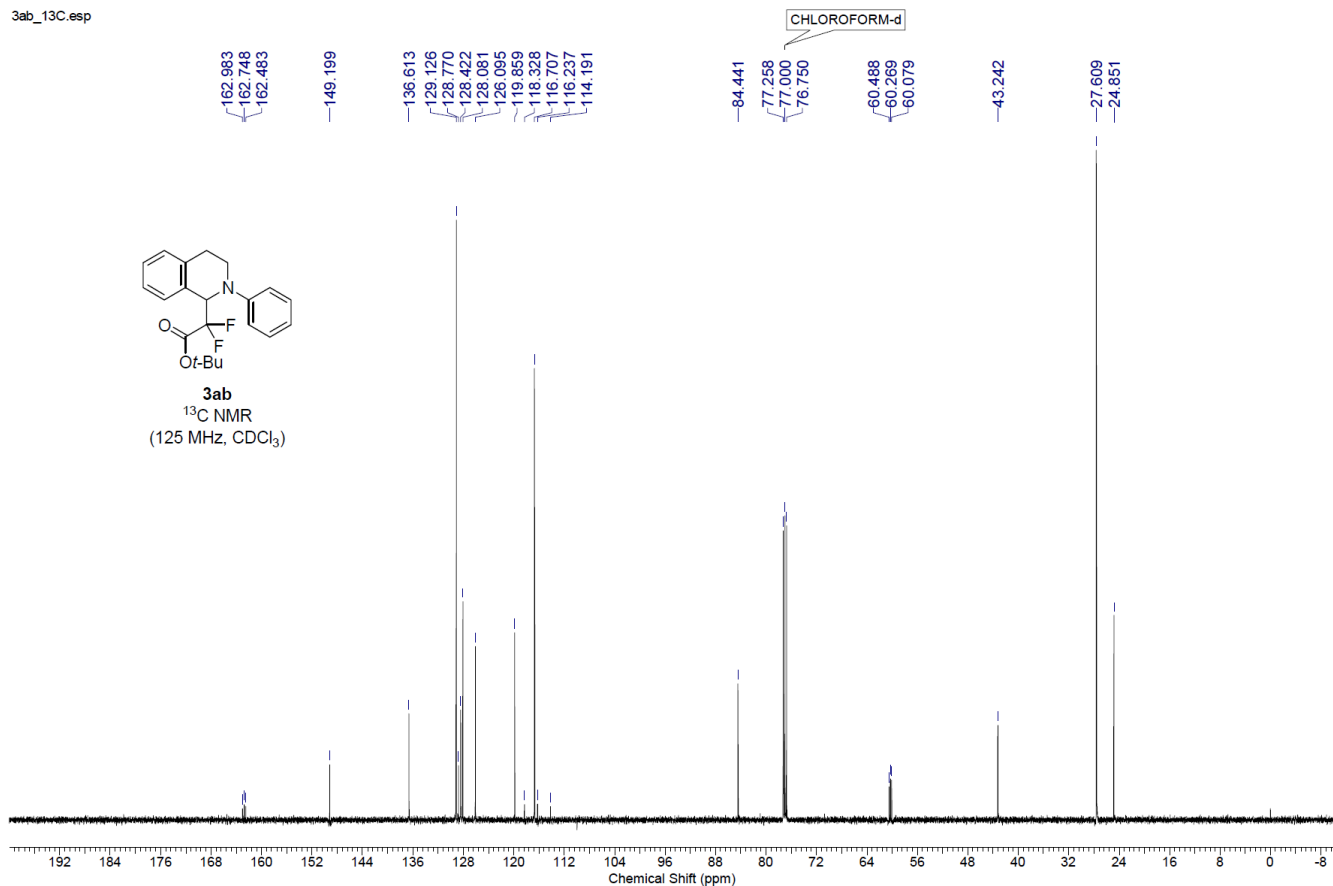

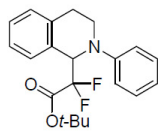

**3ab**  
<sup>19</sup>F NMR  
(376 MHz, CDCl<sub>3</sub>)

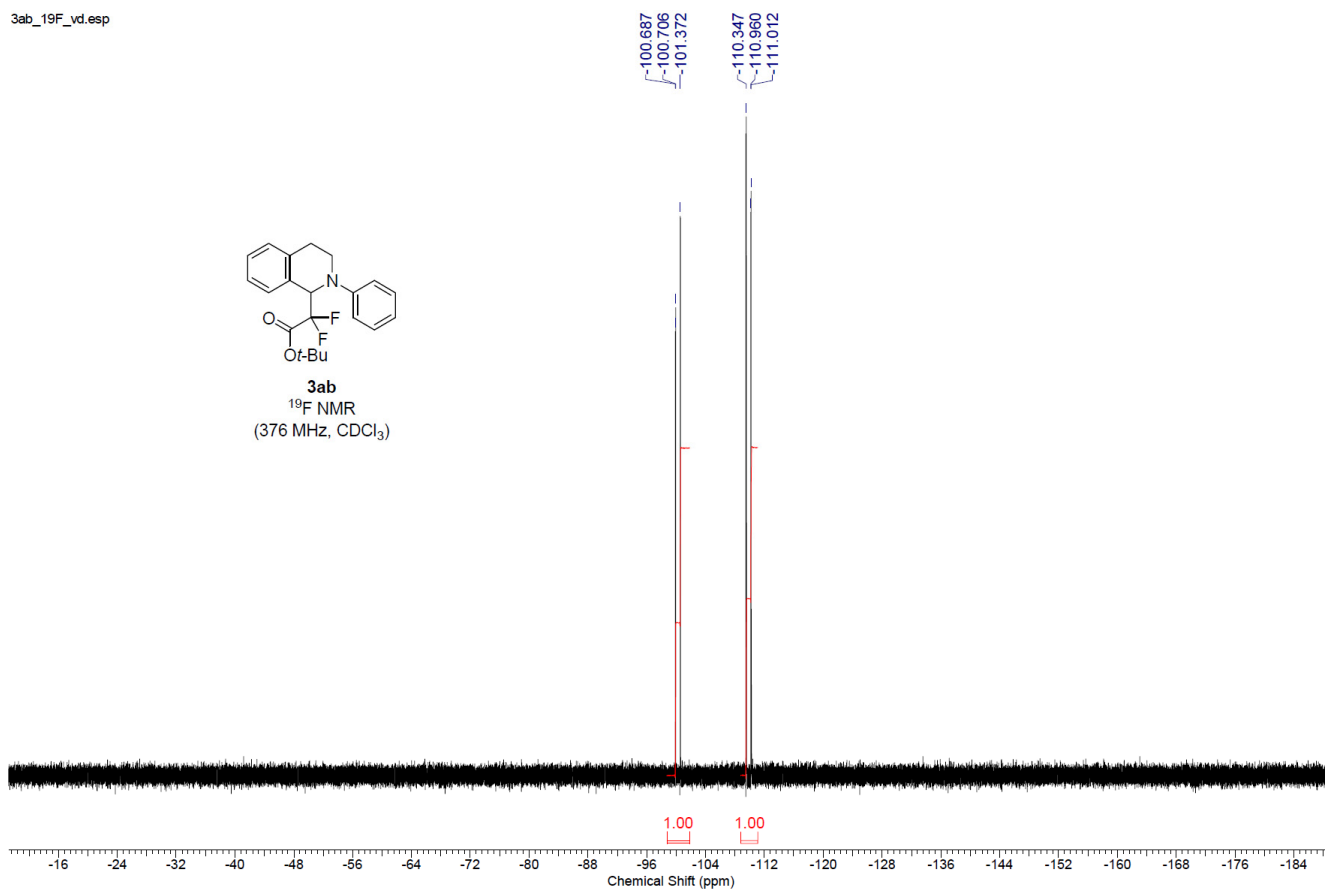

3ac\_1H\_v2.esp

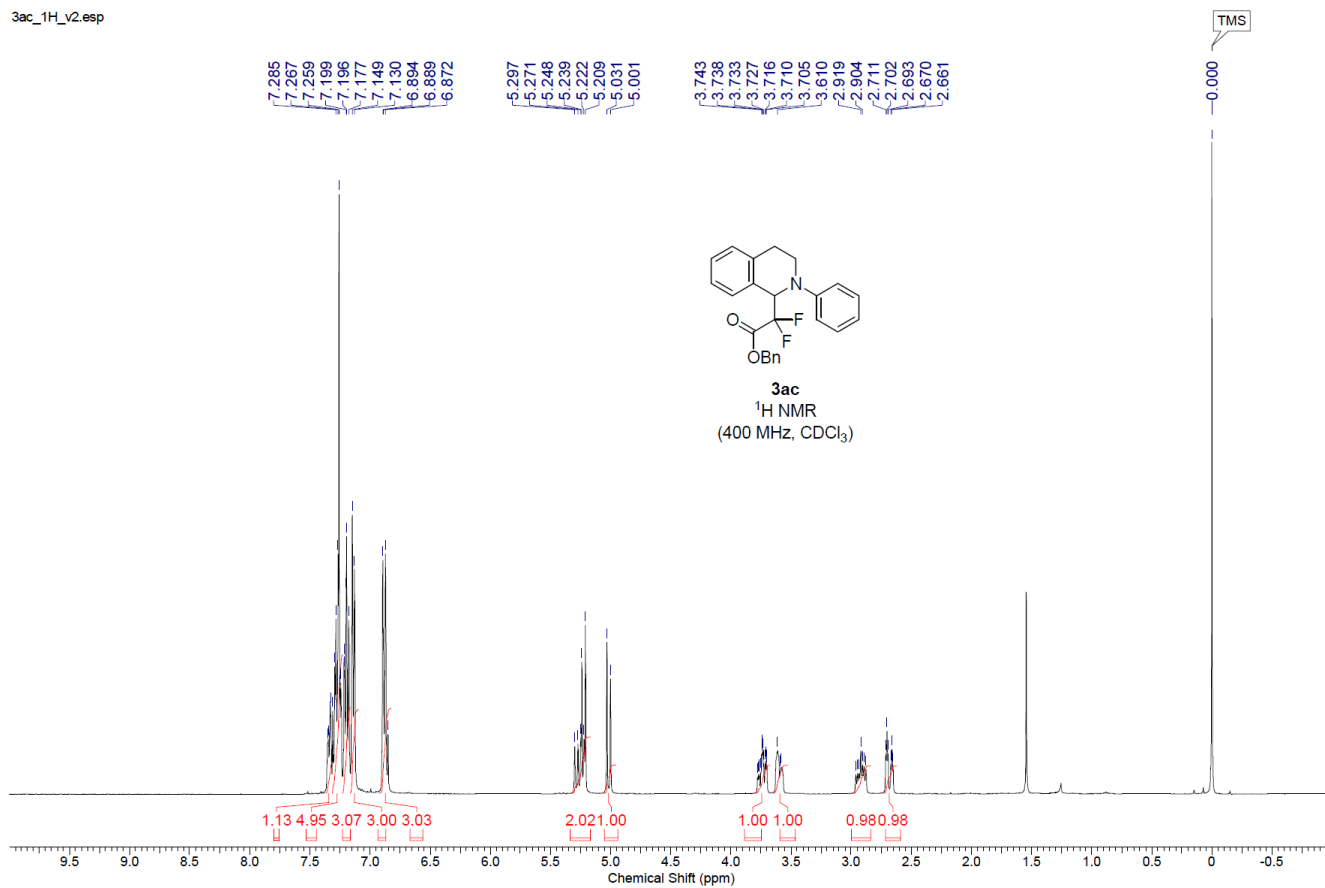

3ac\_13C.esp

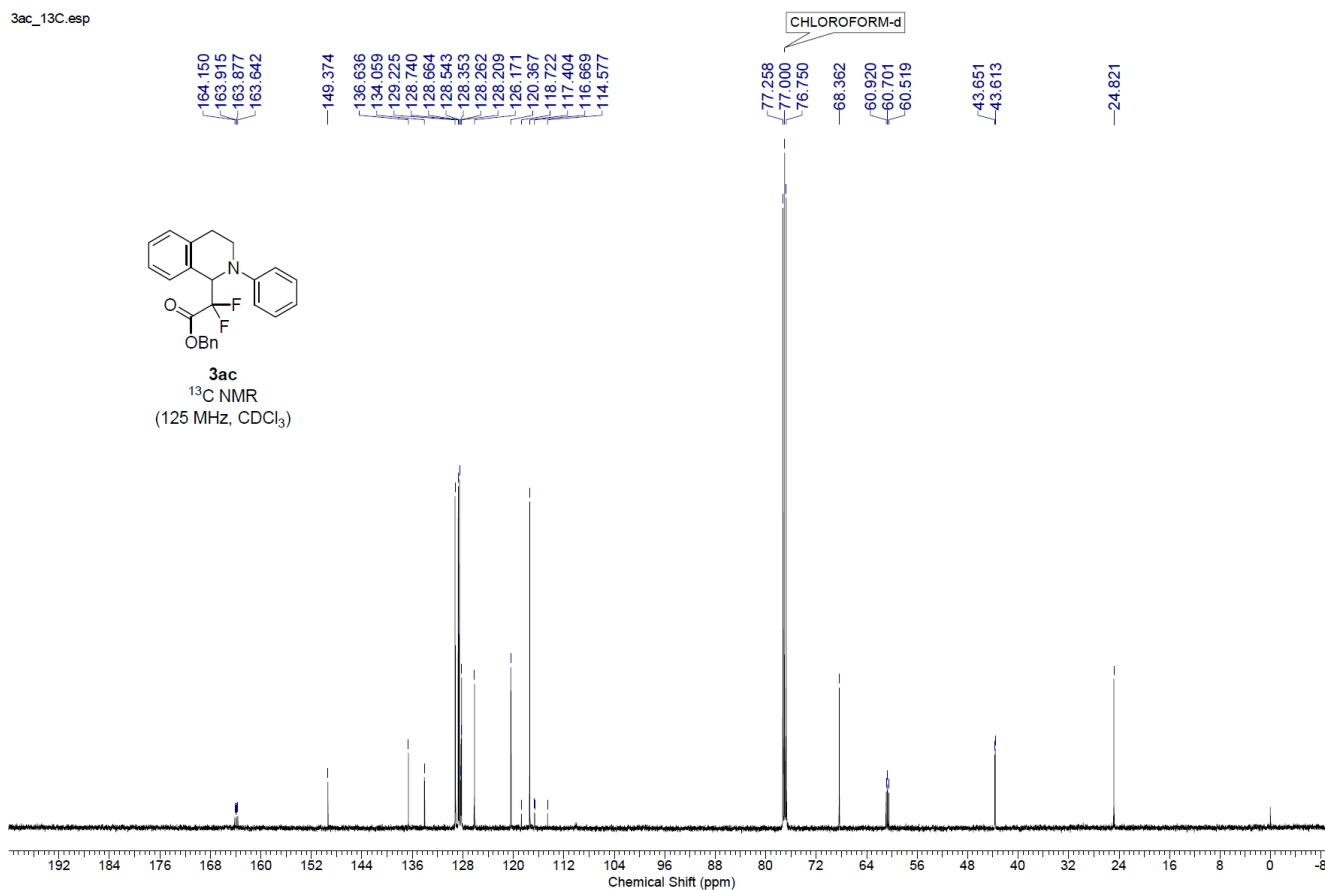

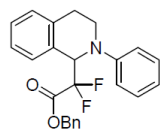

**3ac**  
<sup>19</sup>F NMR  
(376 MHz, CDCl<sub>3</sub>)

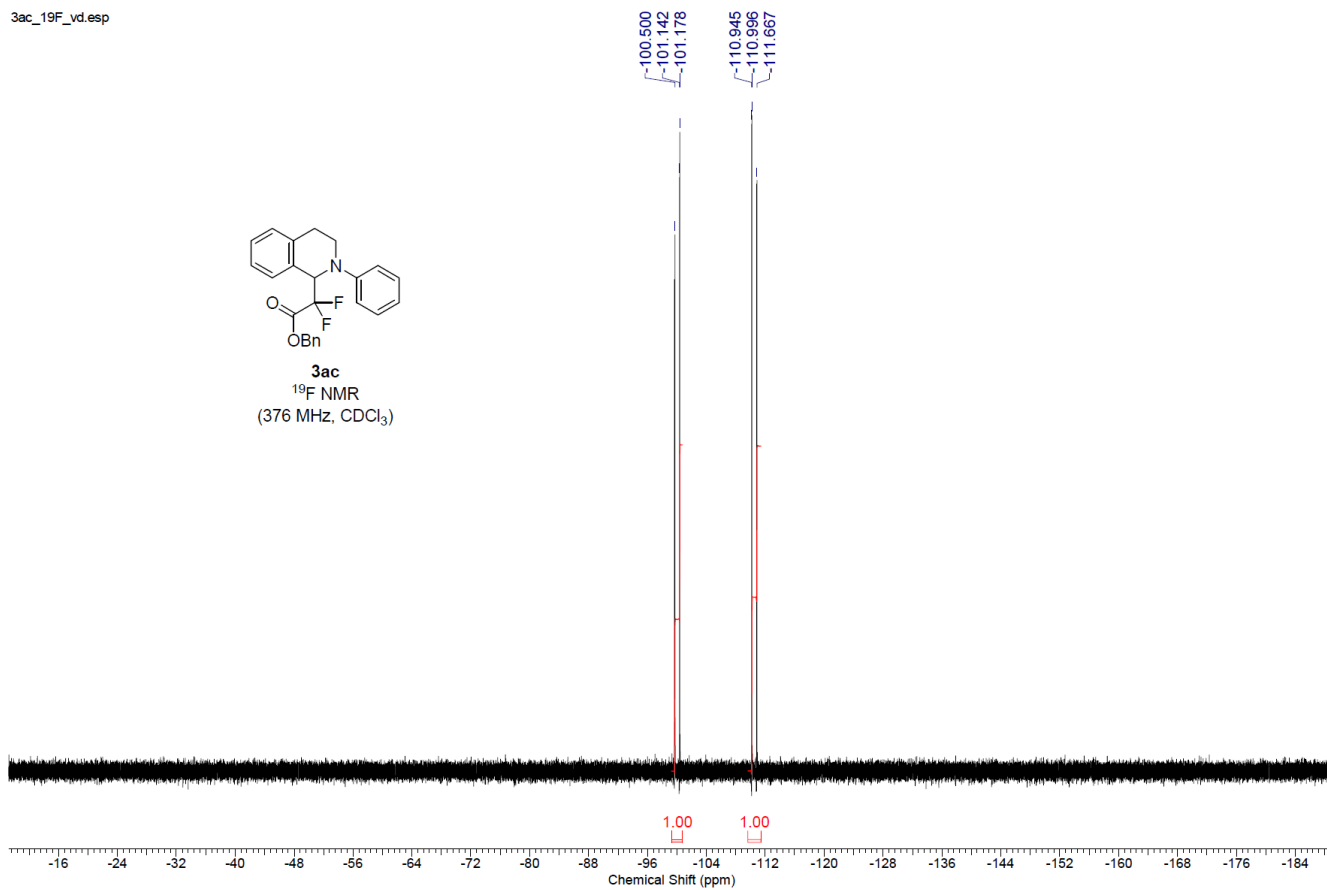

3ad\_1H.esp

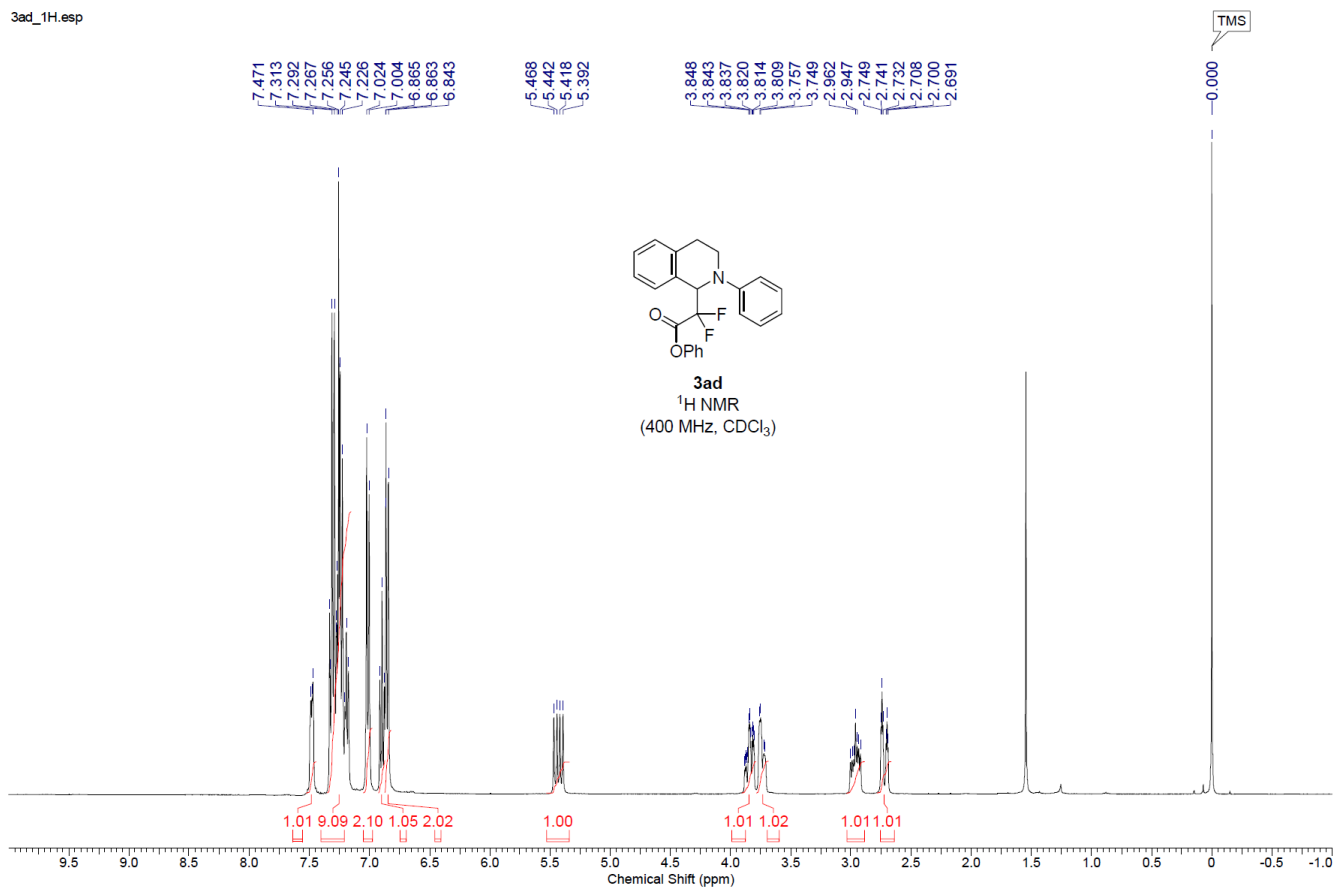

3ad\_13C.esp

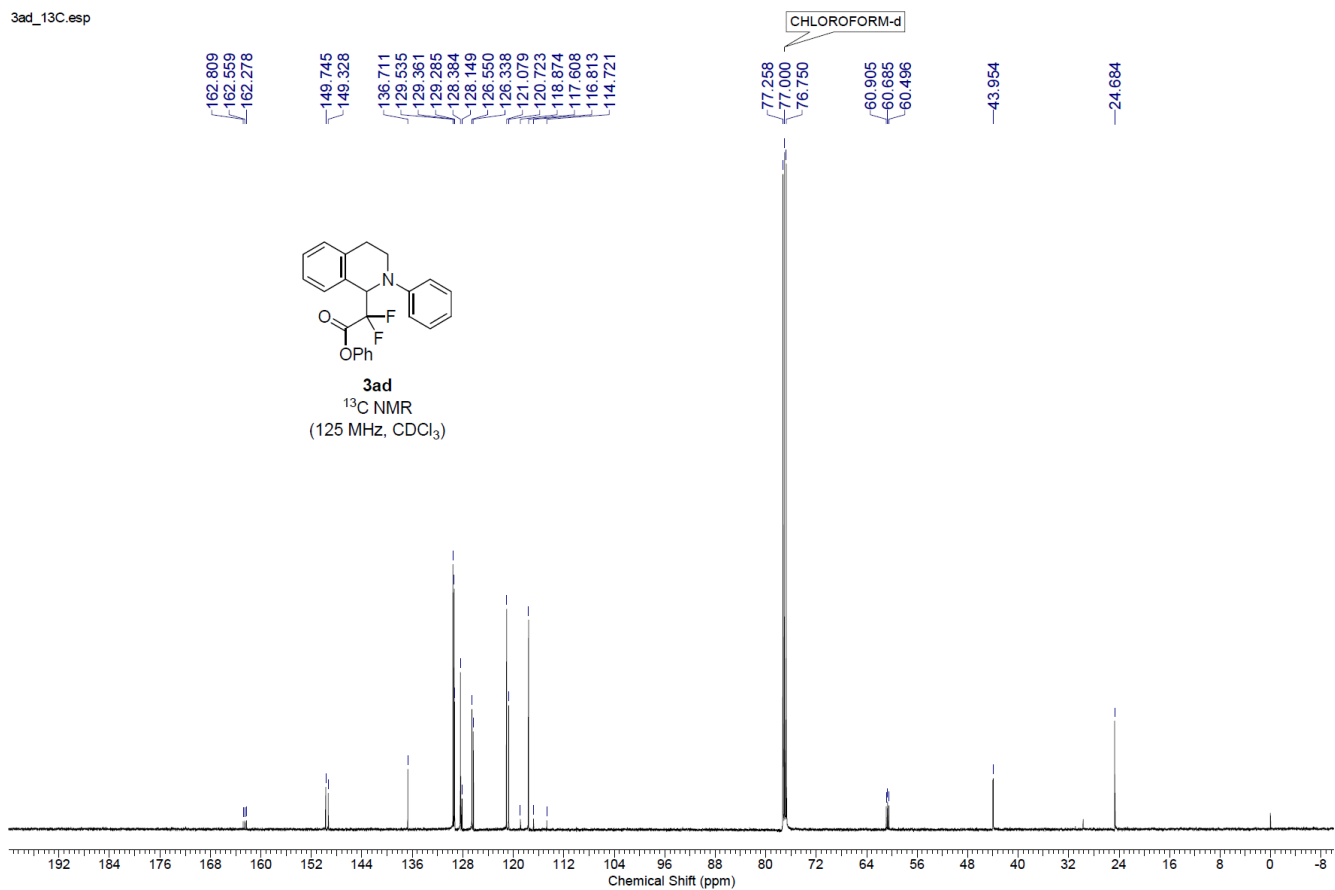

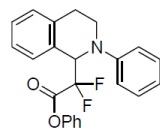

**3ad**  
<sup>19</sup>F NMR  
(376 MHz, CDCl<sub>3</sub>)

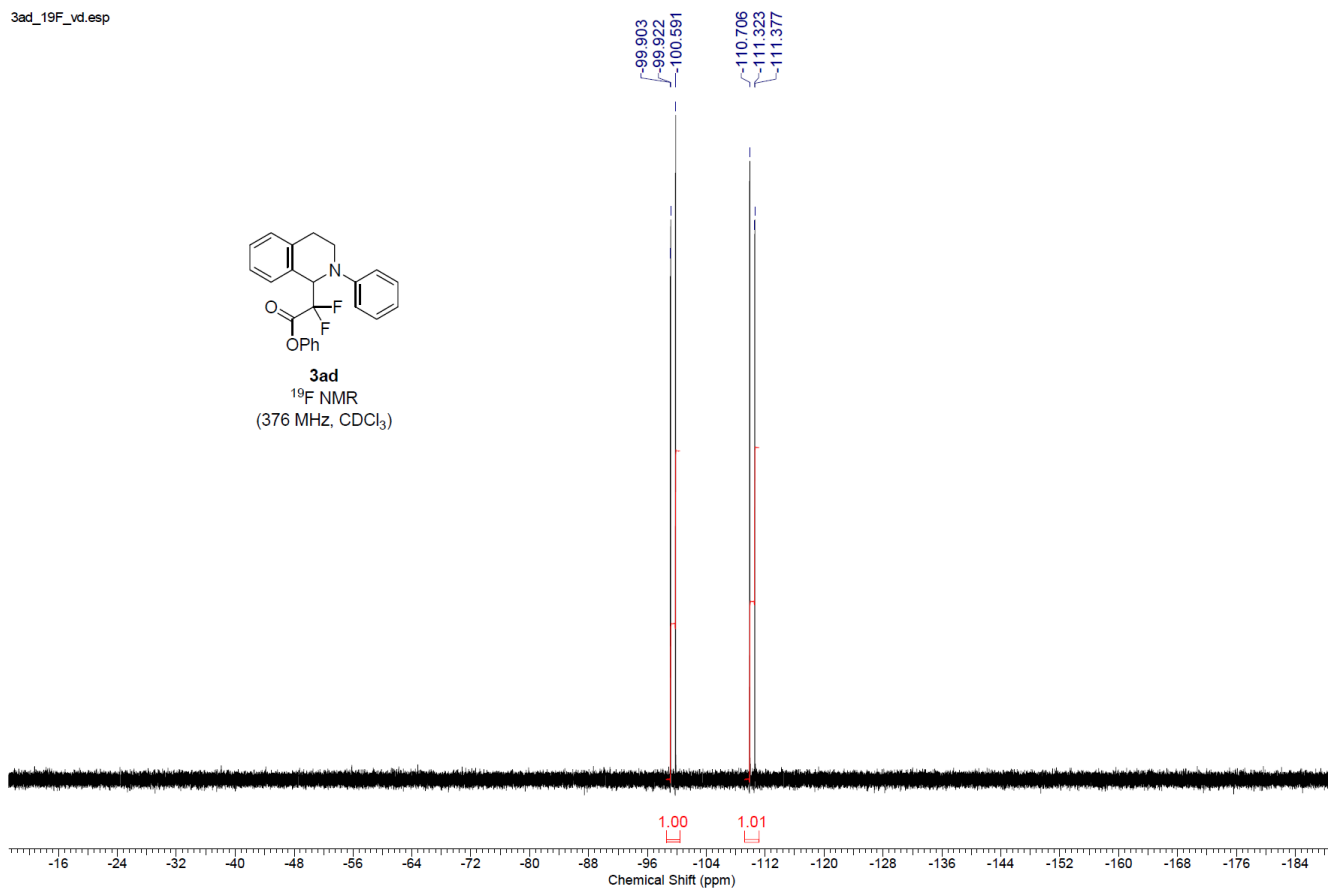

3ae\_1H.esp

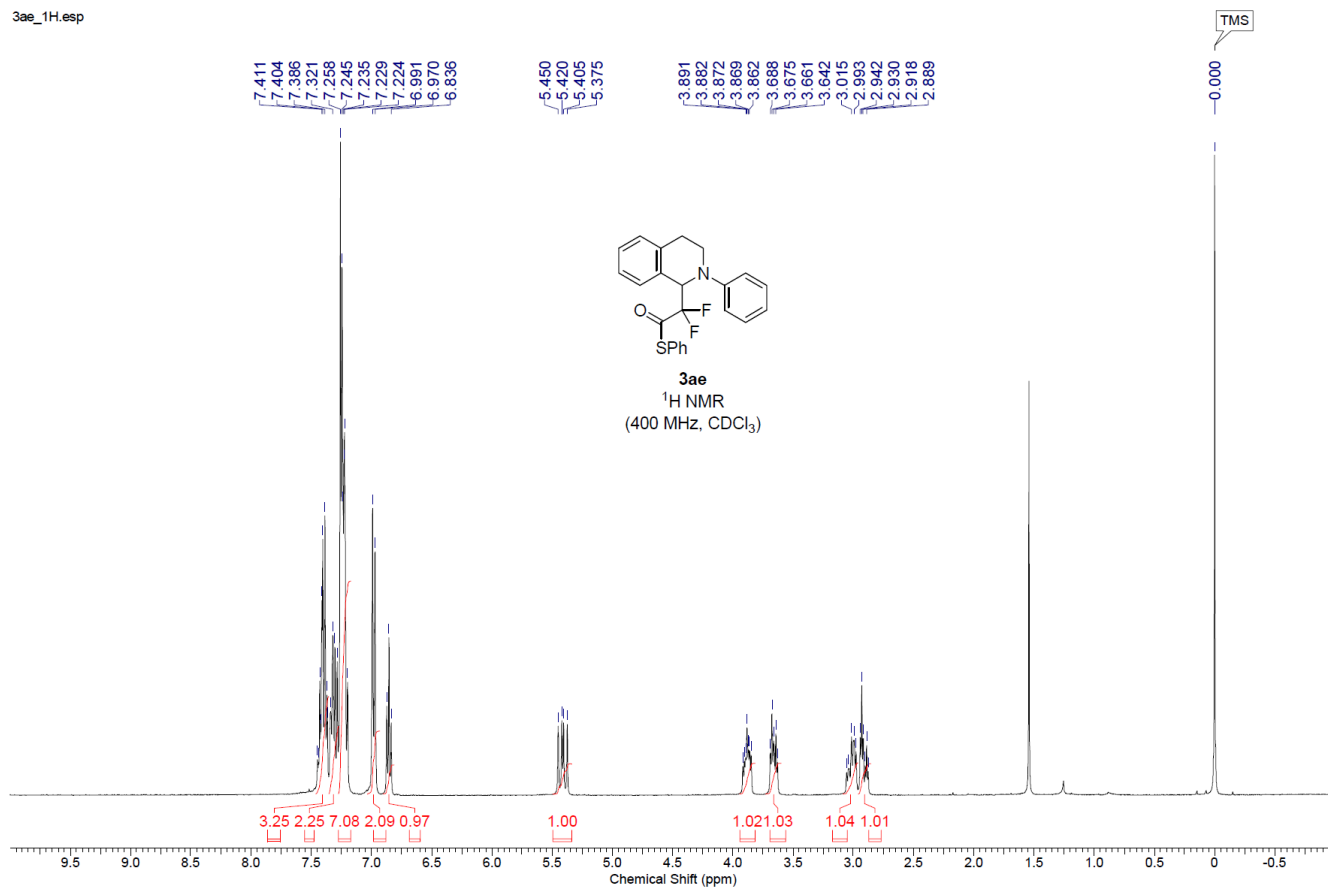

3ae\_13C.esp

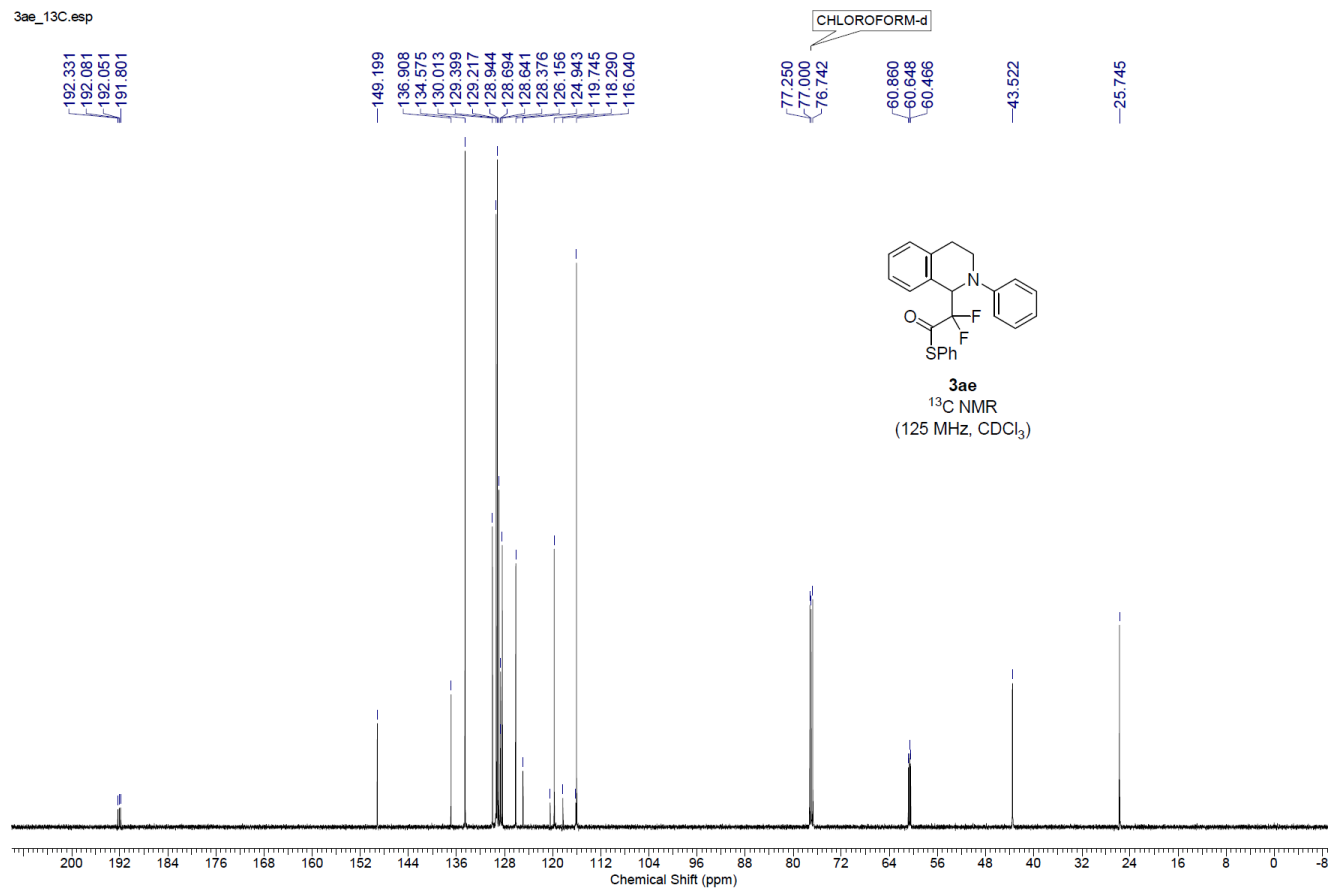



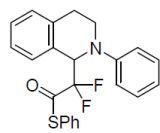

**3ae**  
<sup>19</sup>F NMR  
(376 MHz, CDCl<sub>3</sub>)

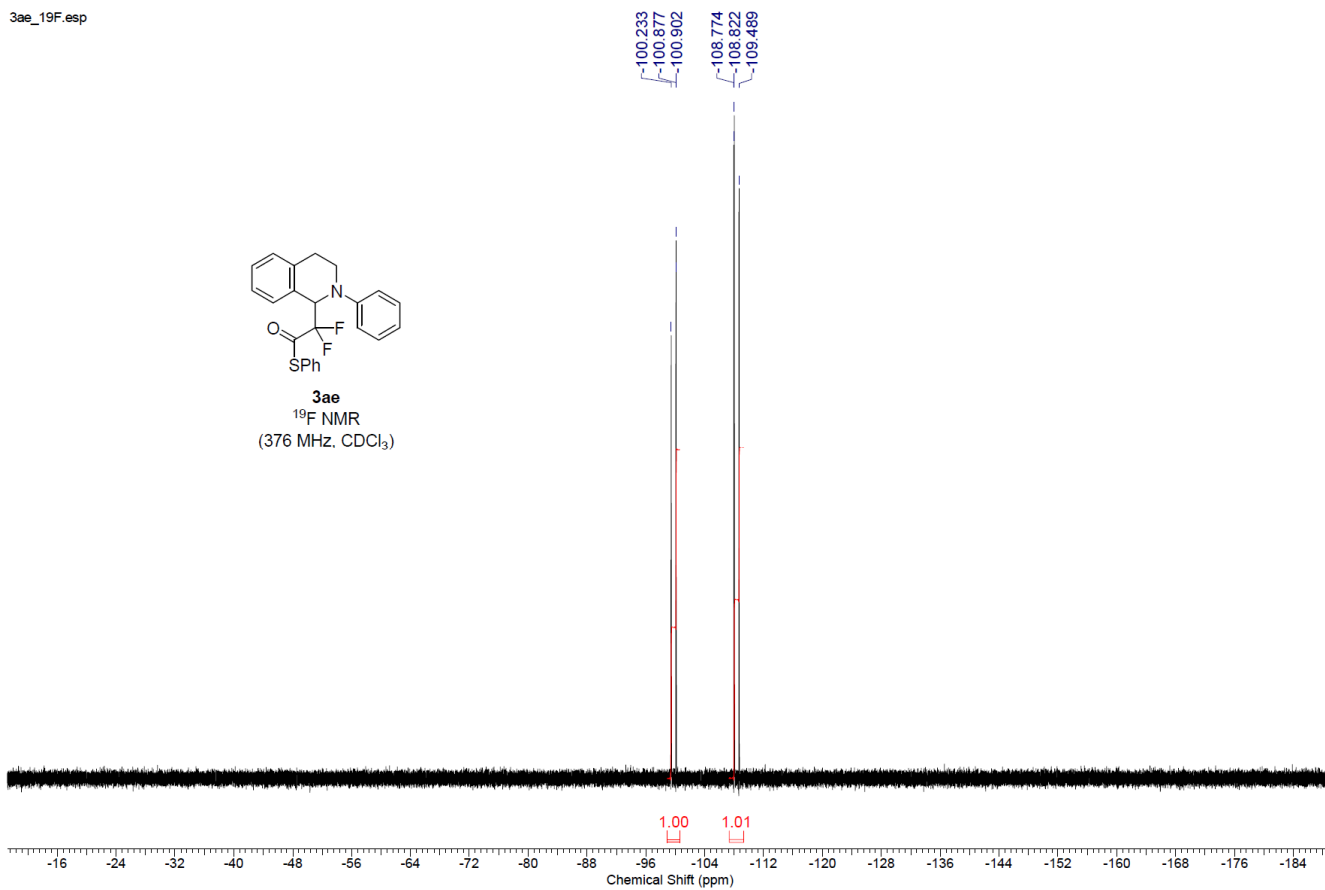

3af\_1H.esp

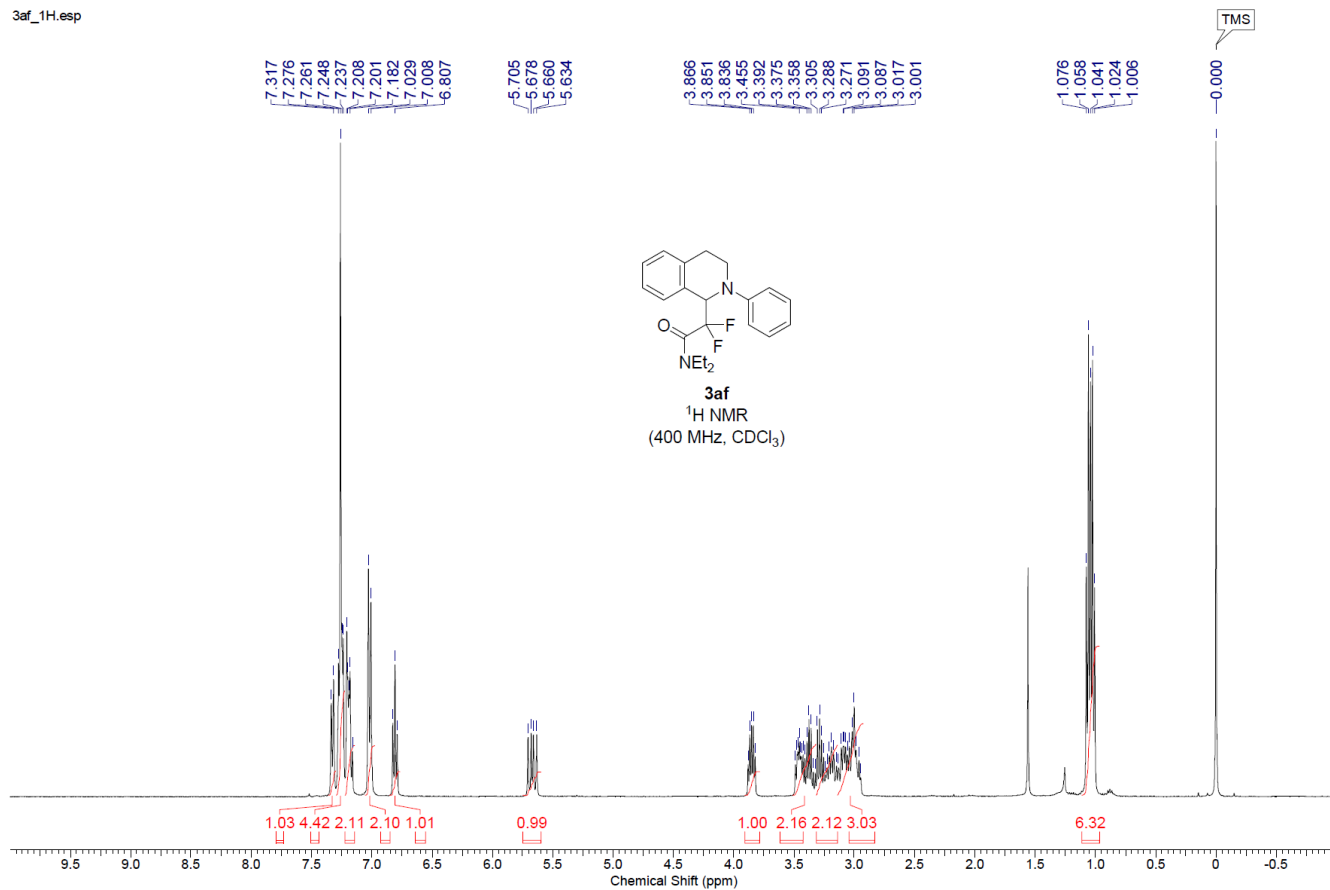

3af\_13C.esp

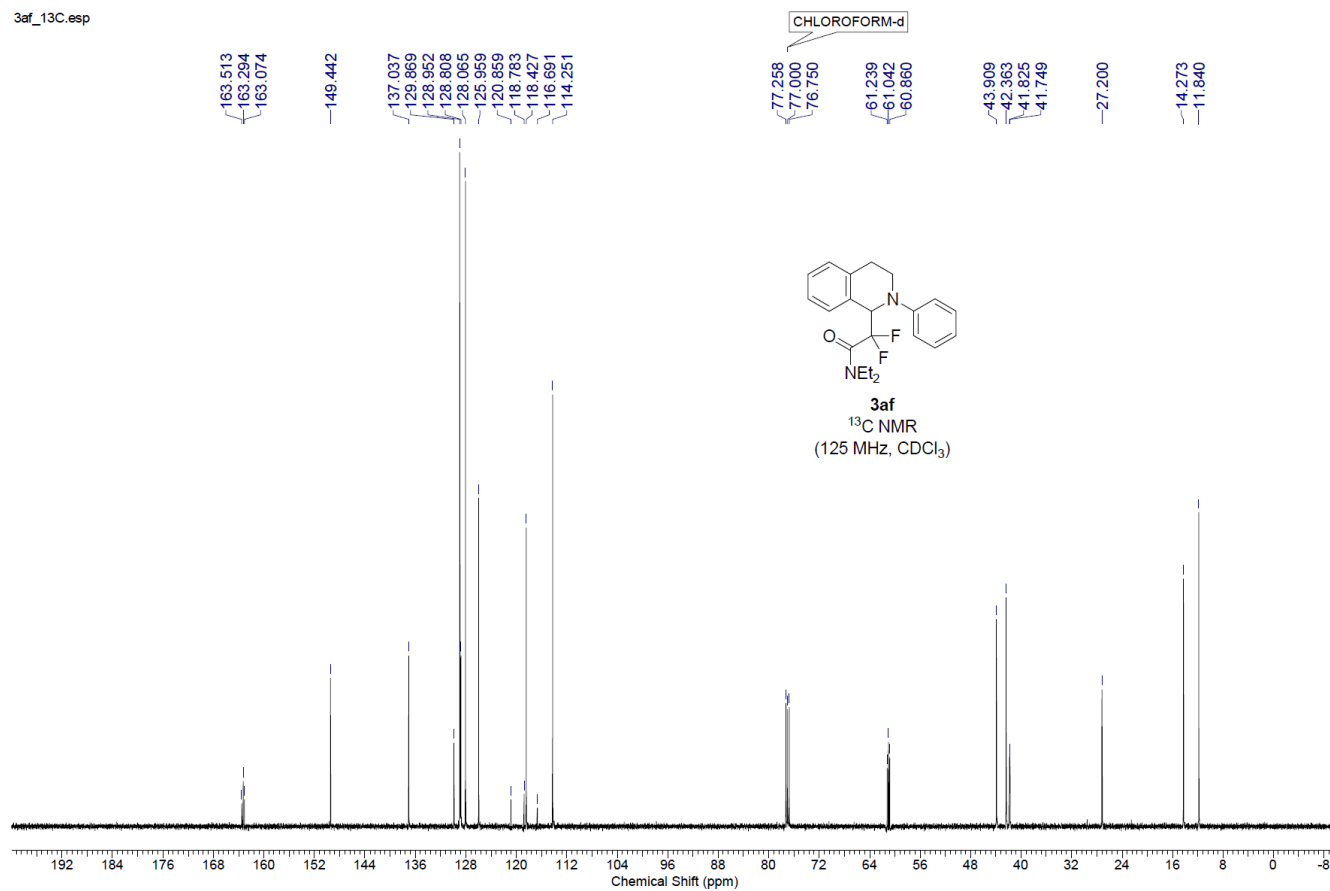

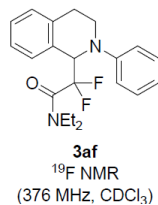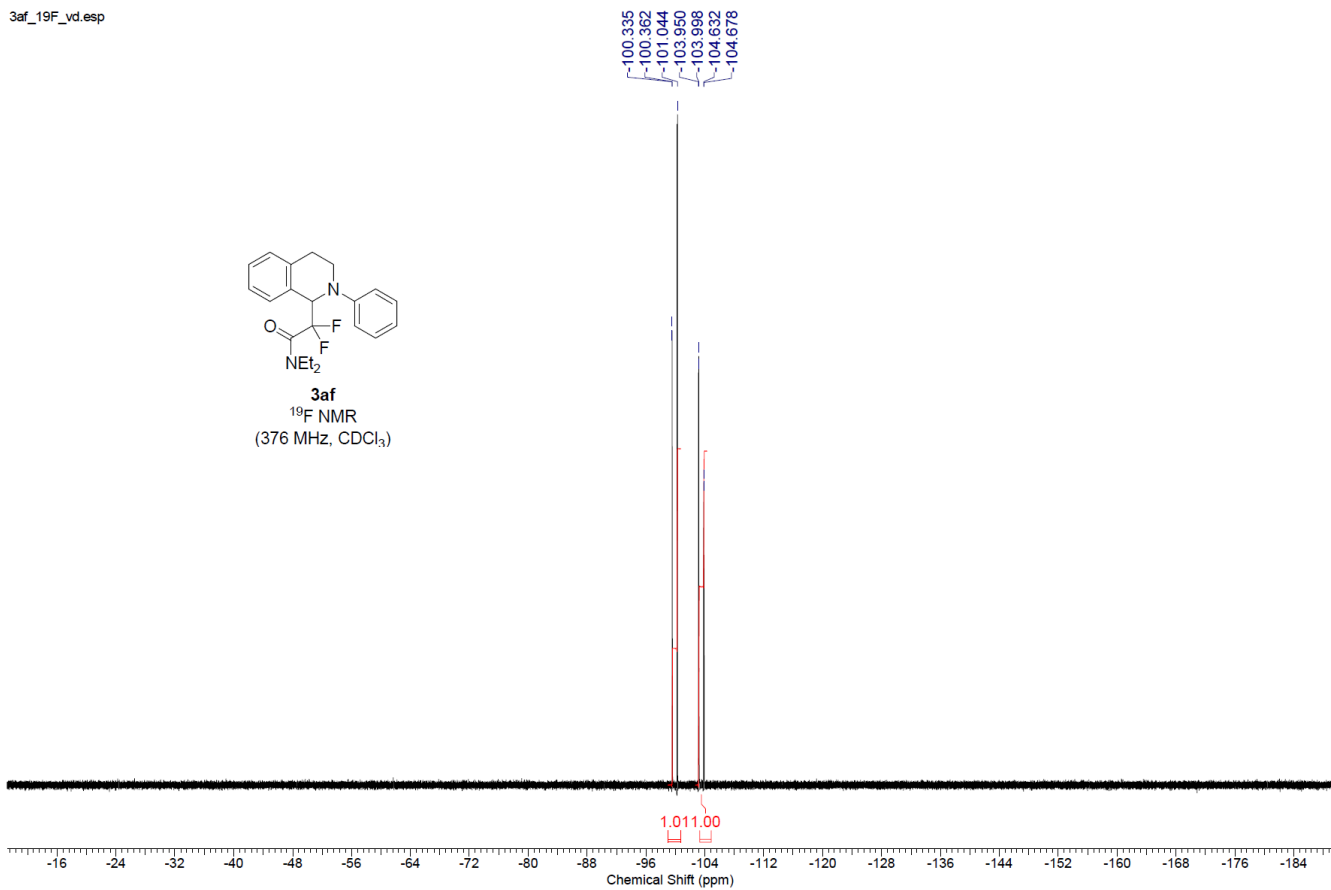

3ag\_1H.esp

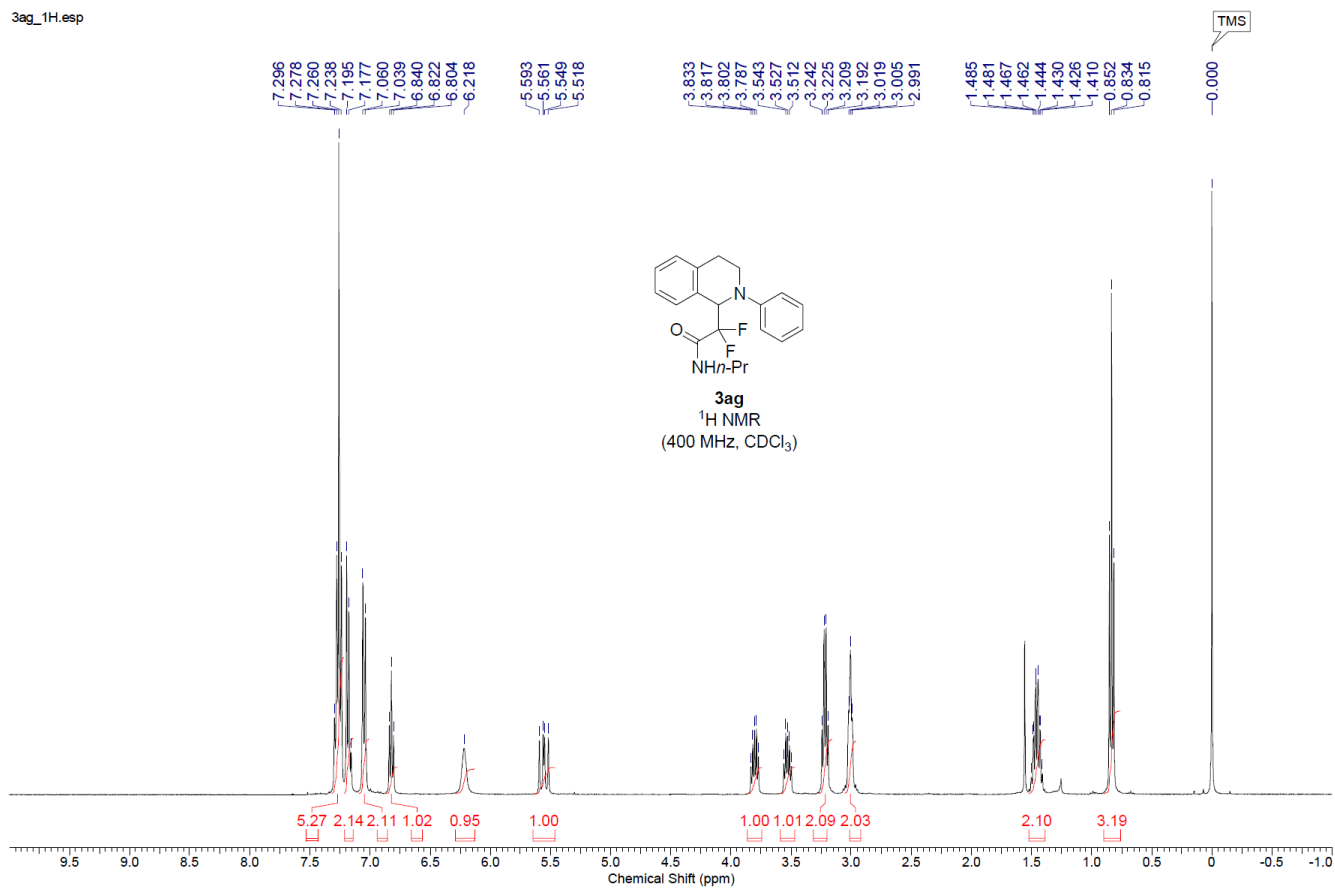

3ag\_13C.esp

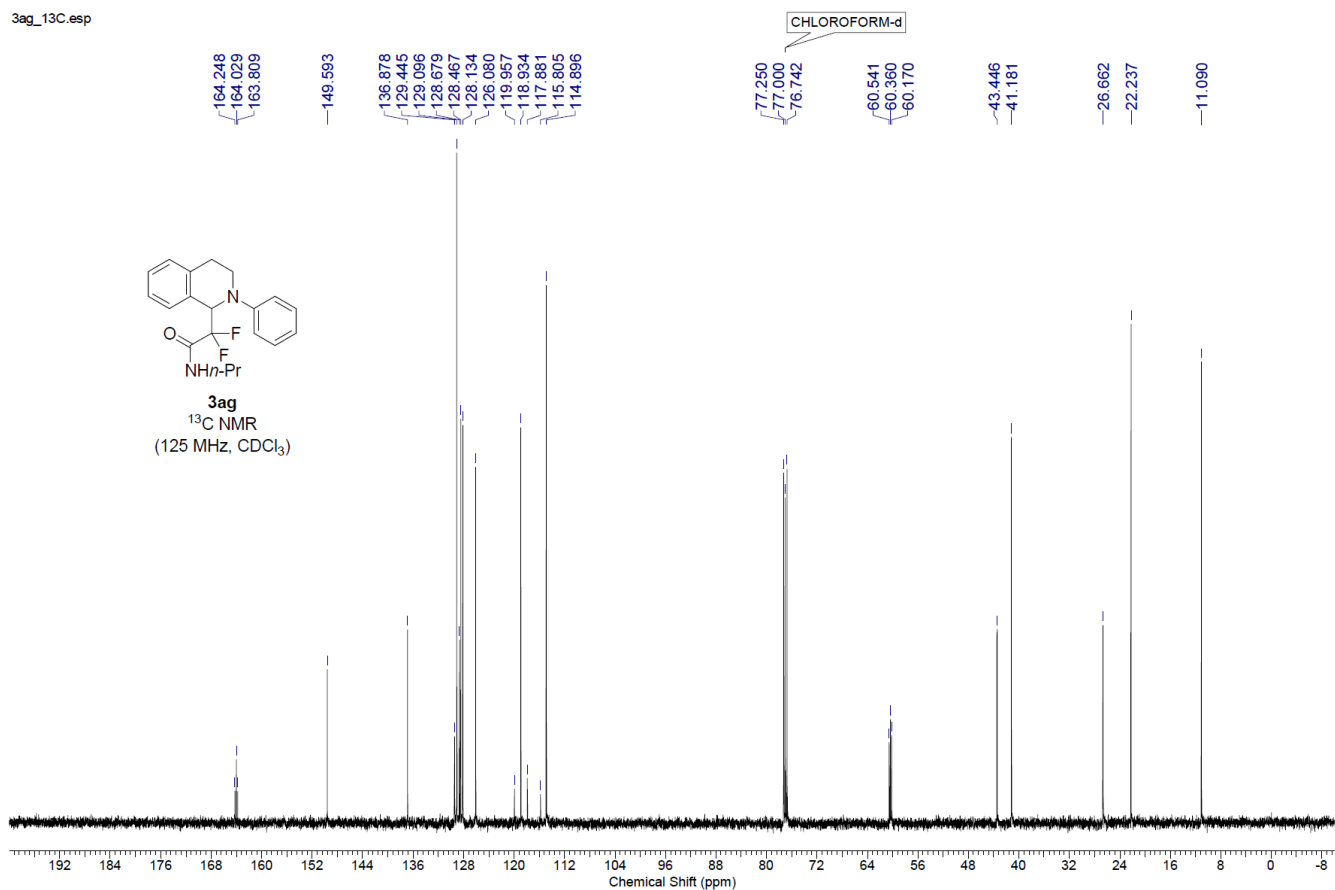

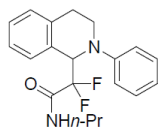

**3ag**  
<sup>19</sup>F NMR  
(376 MHz, CDCl<sub>3</sub>)

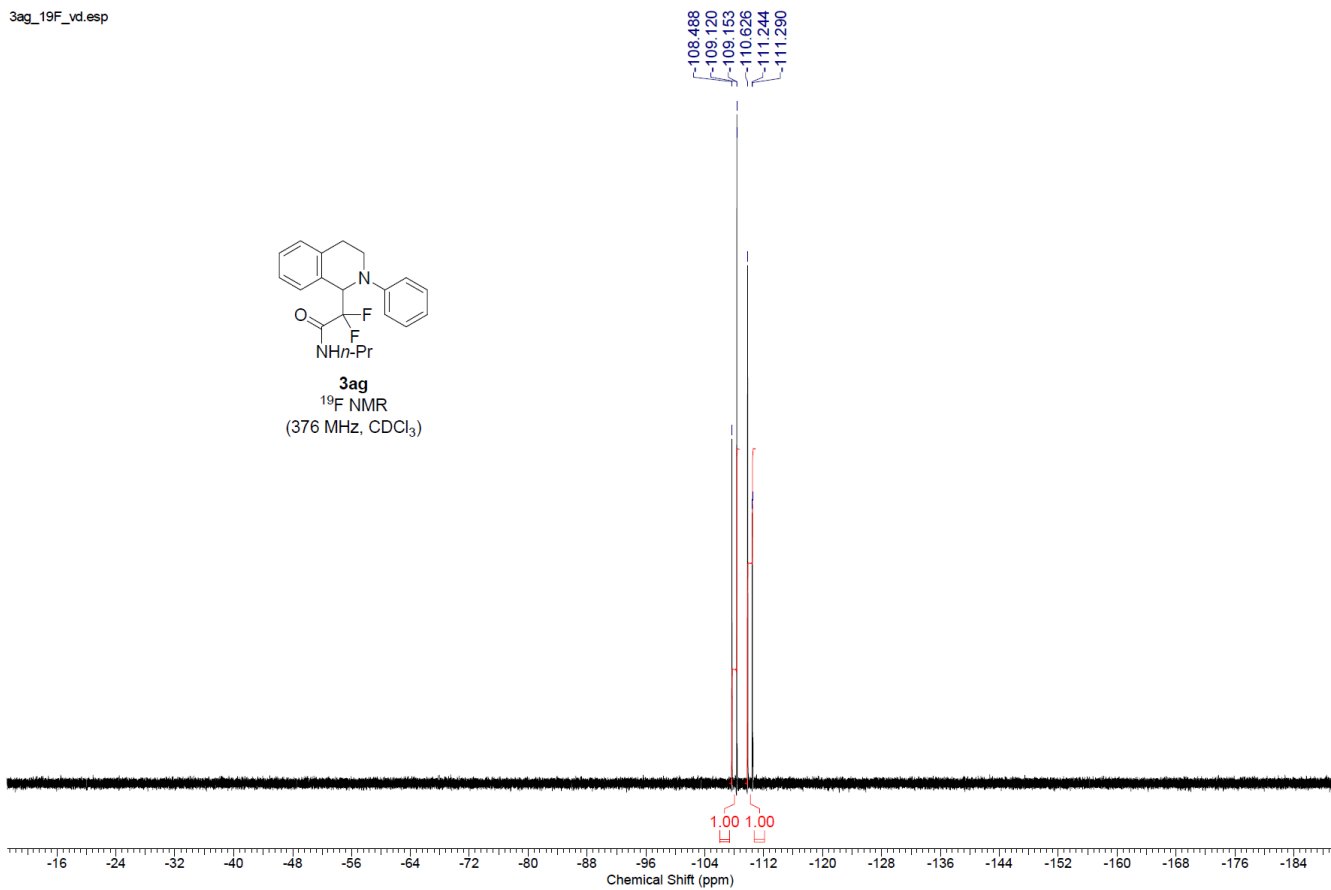

5aa\_1H.esp

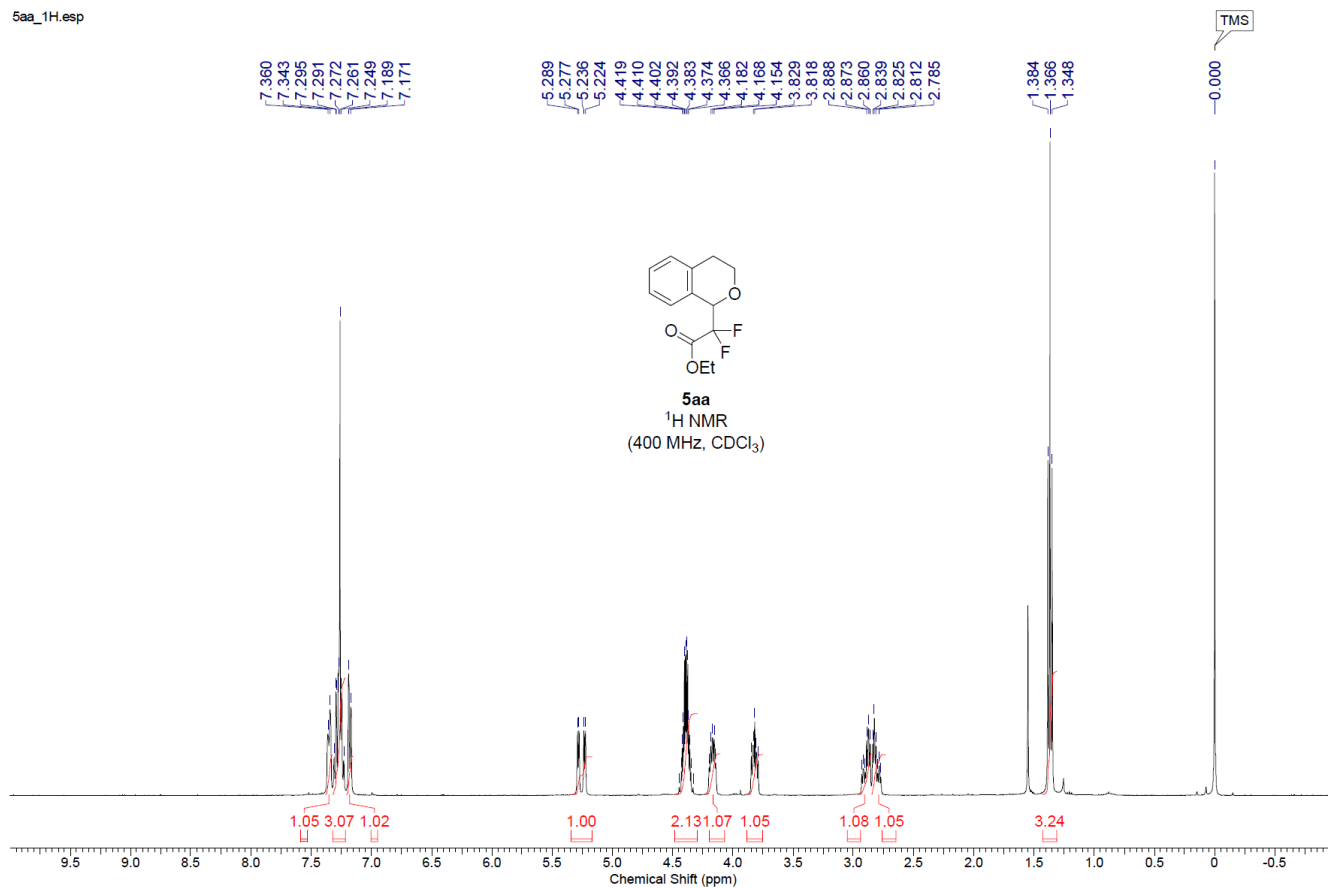

5aa\_13C\_v2.esp

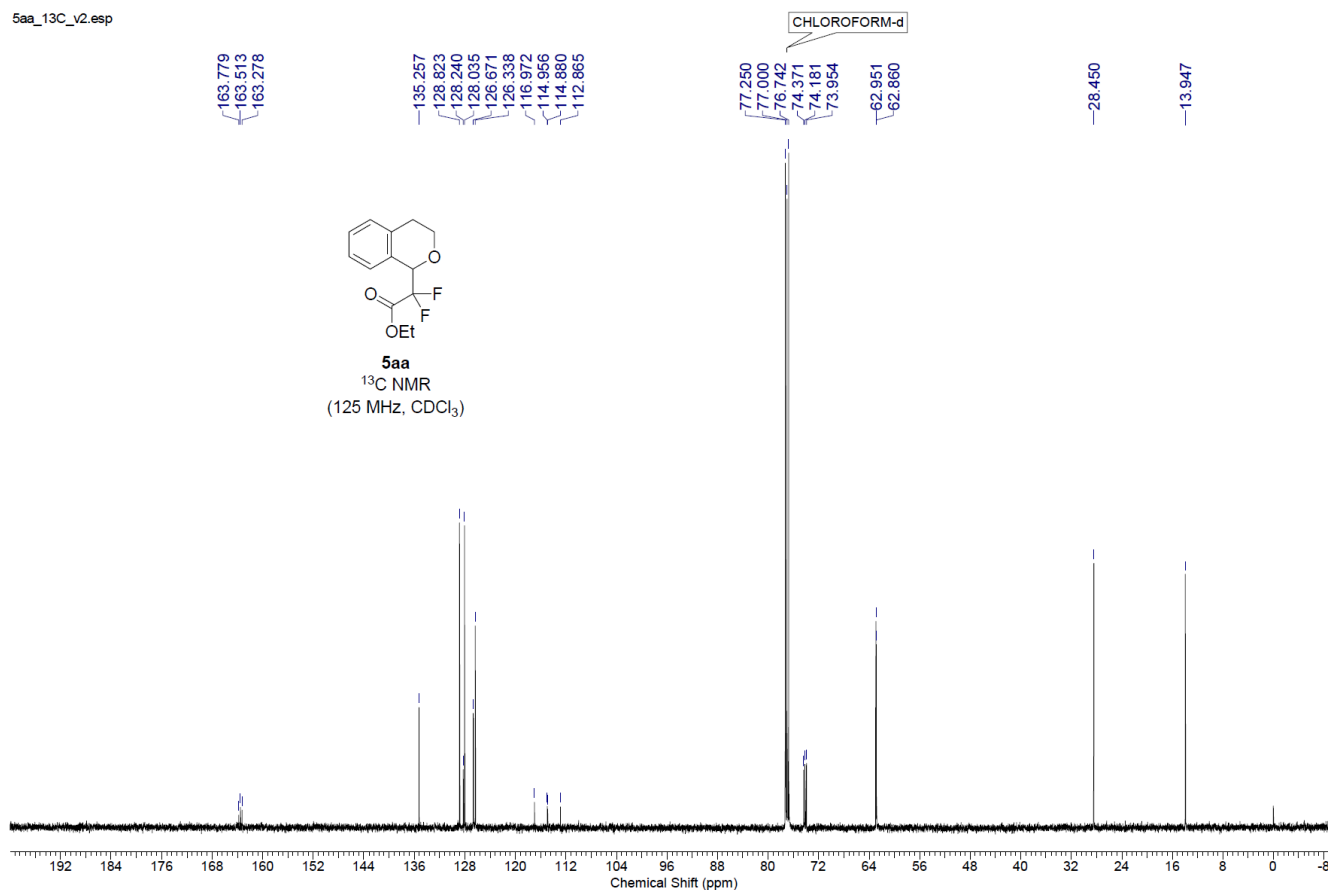

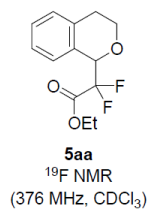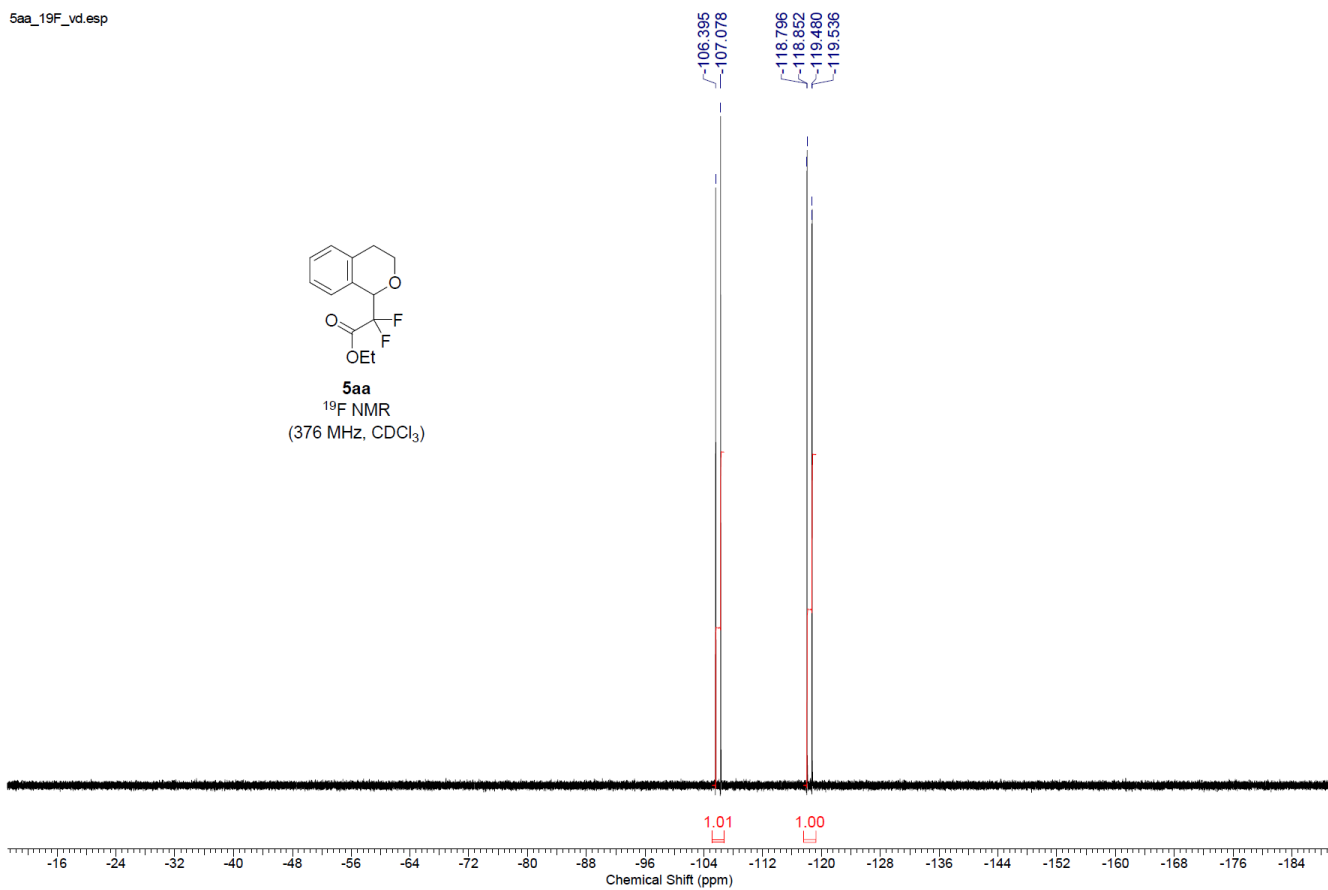

5ba\_1H.esp

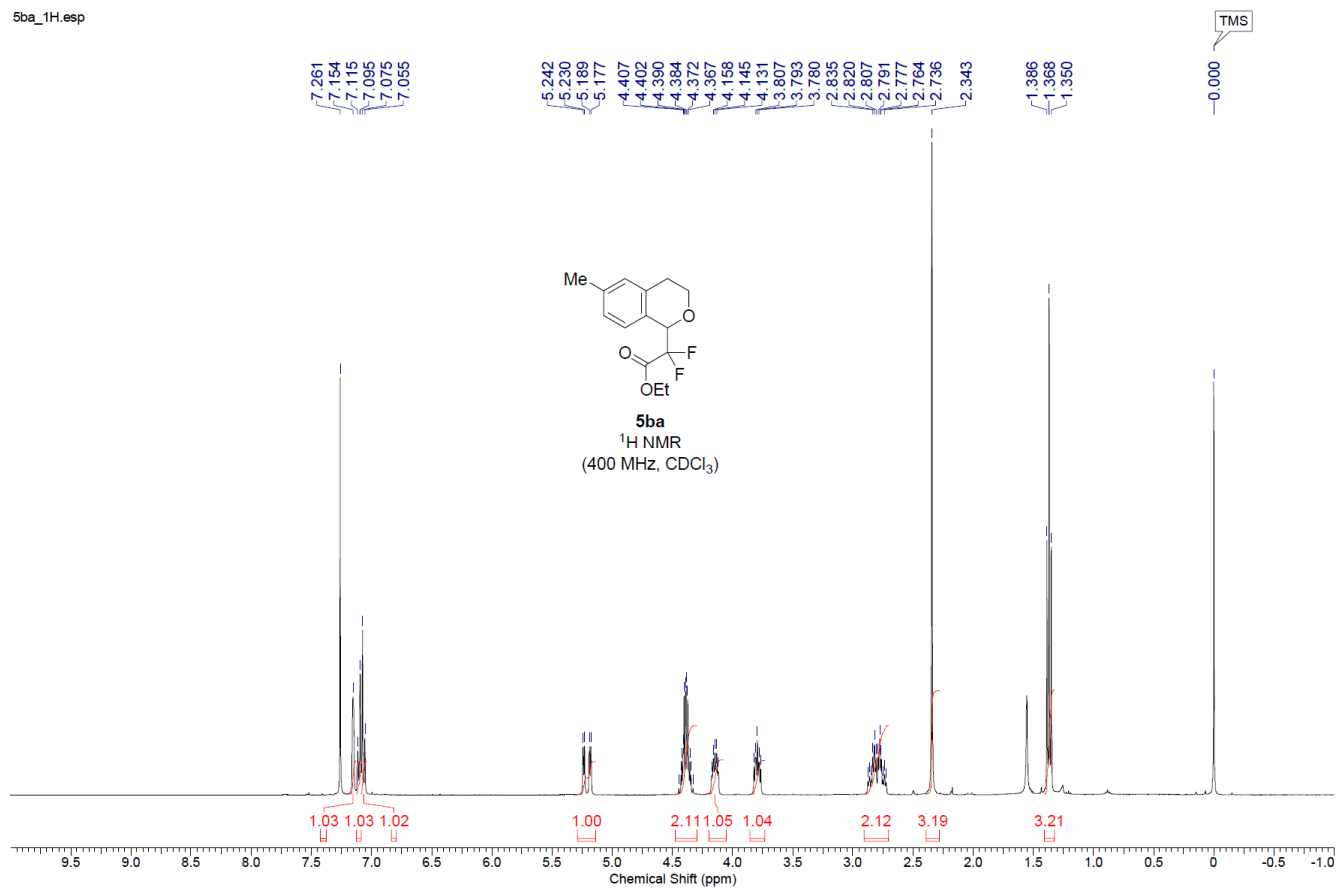

5ba\_13C.esp

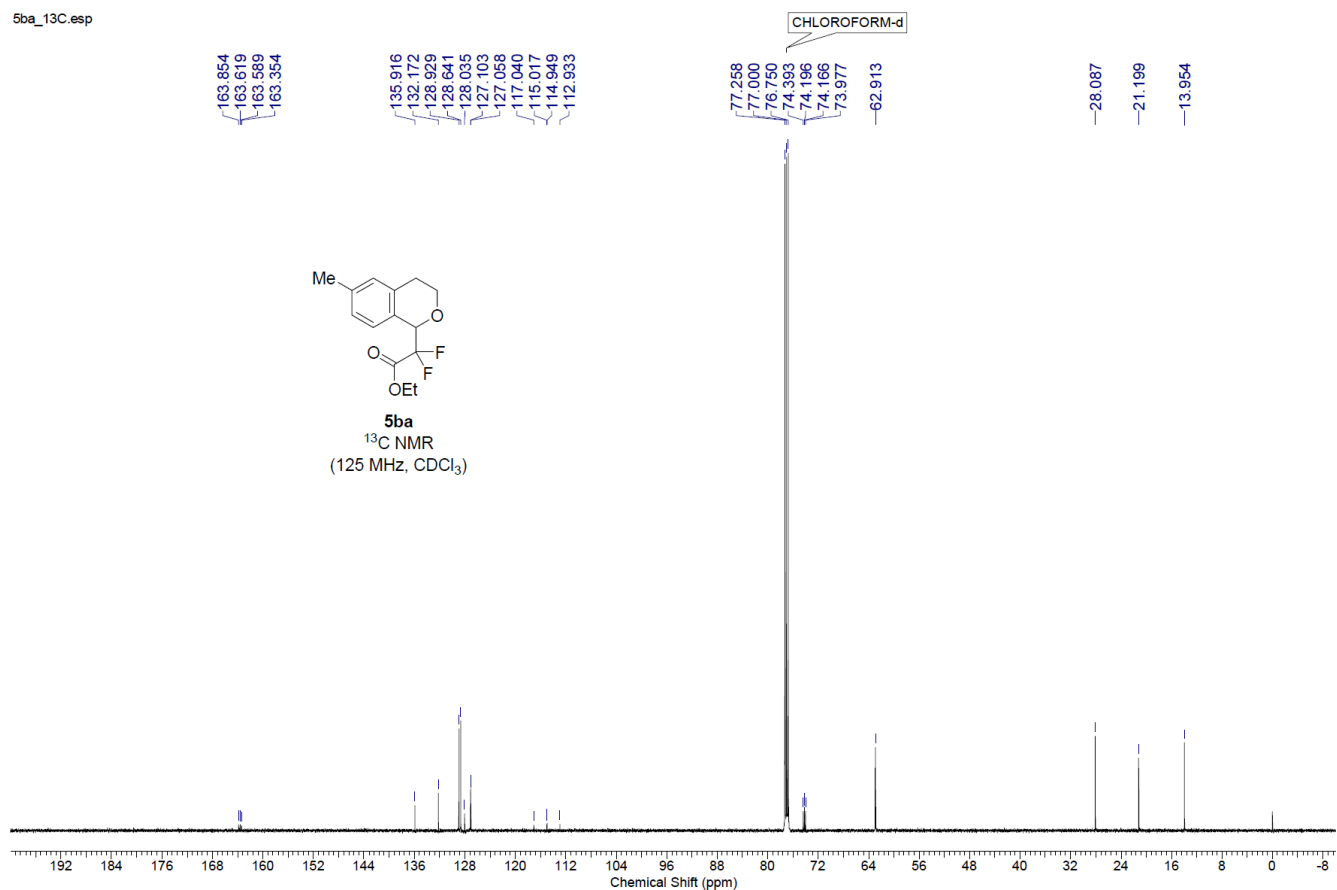



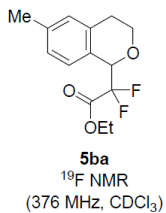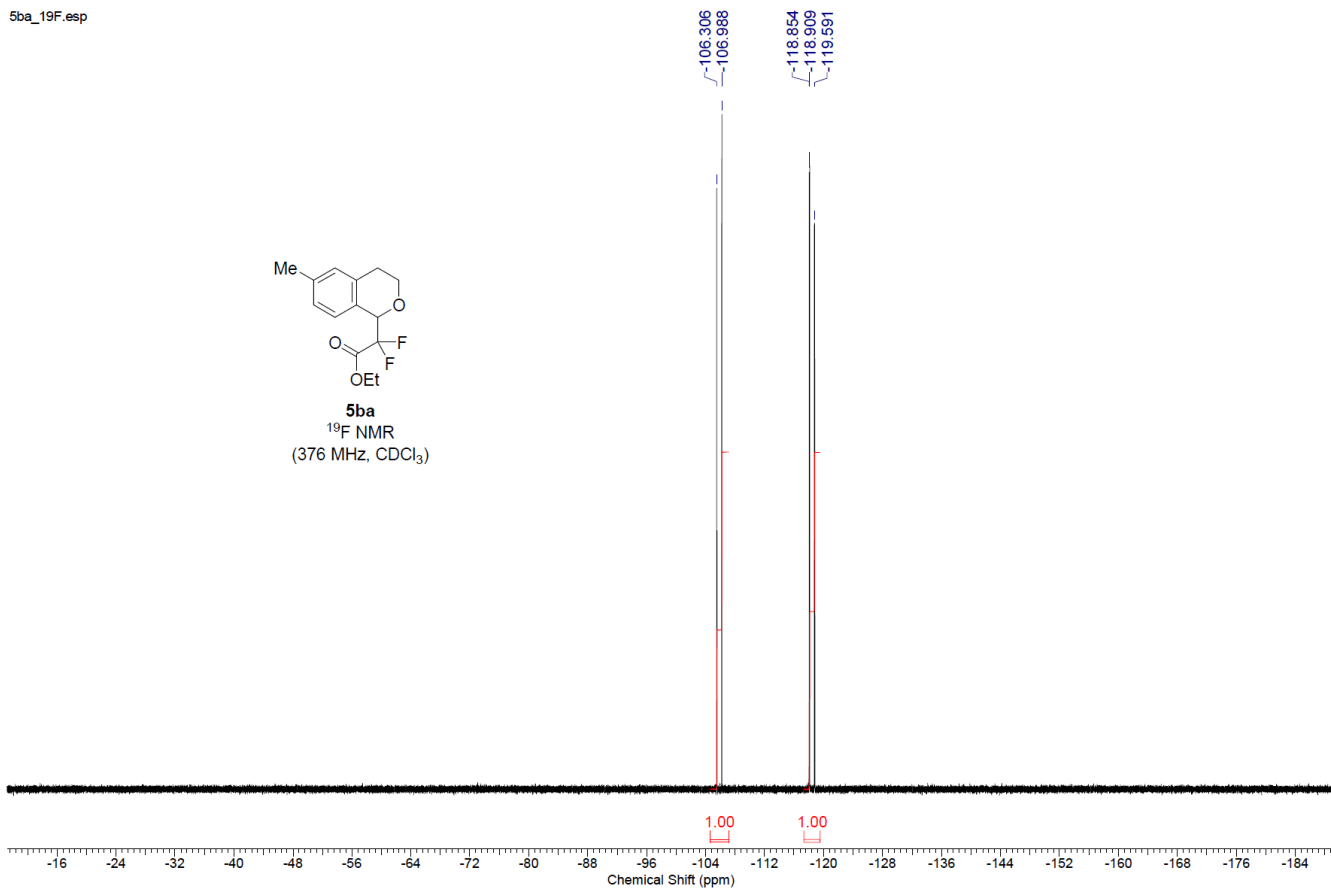

5ca\_1H.esp

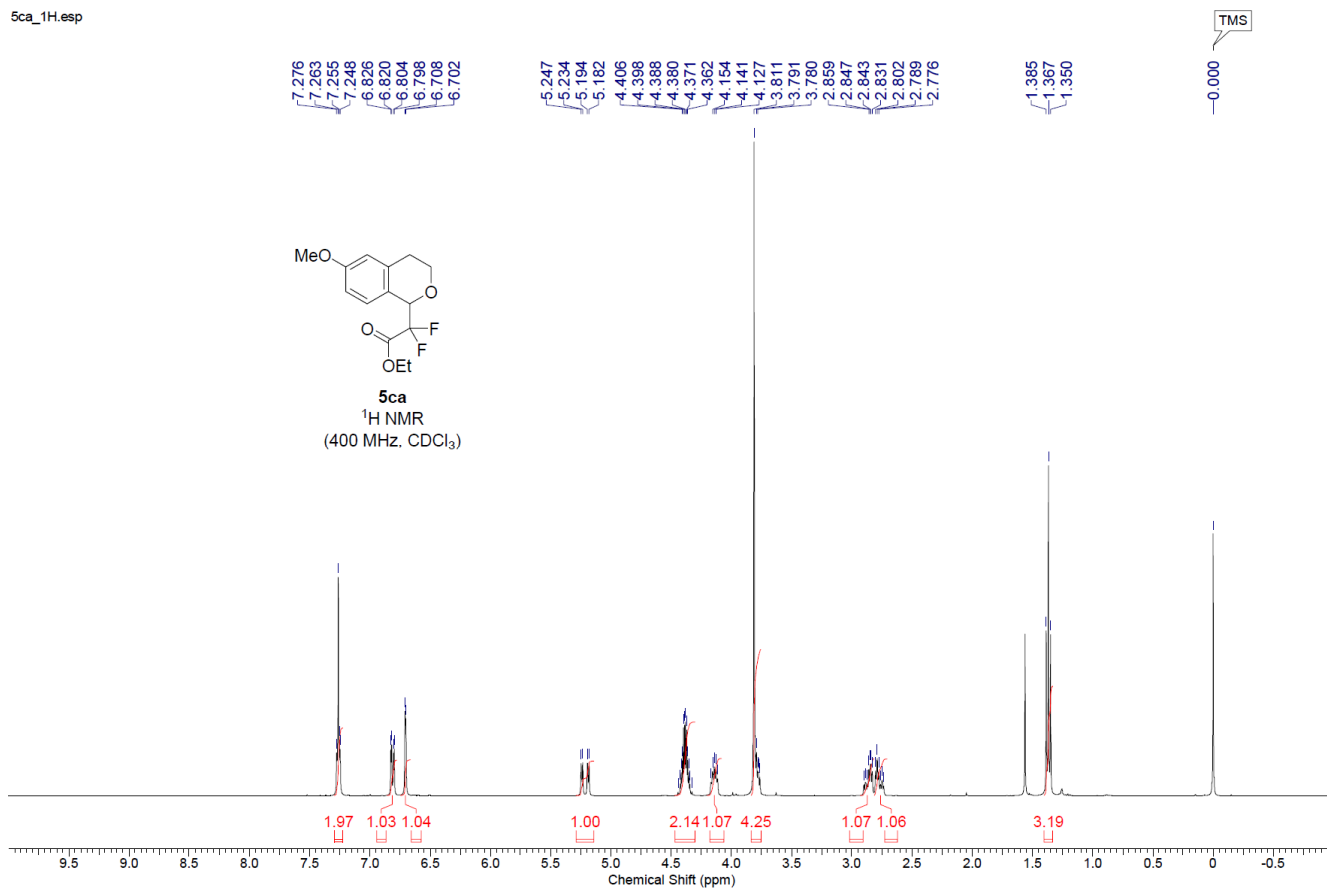

5ca\_13C\_v2.esp

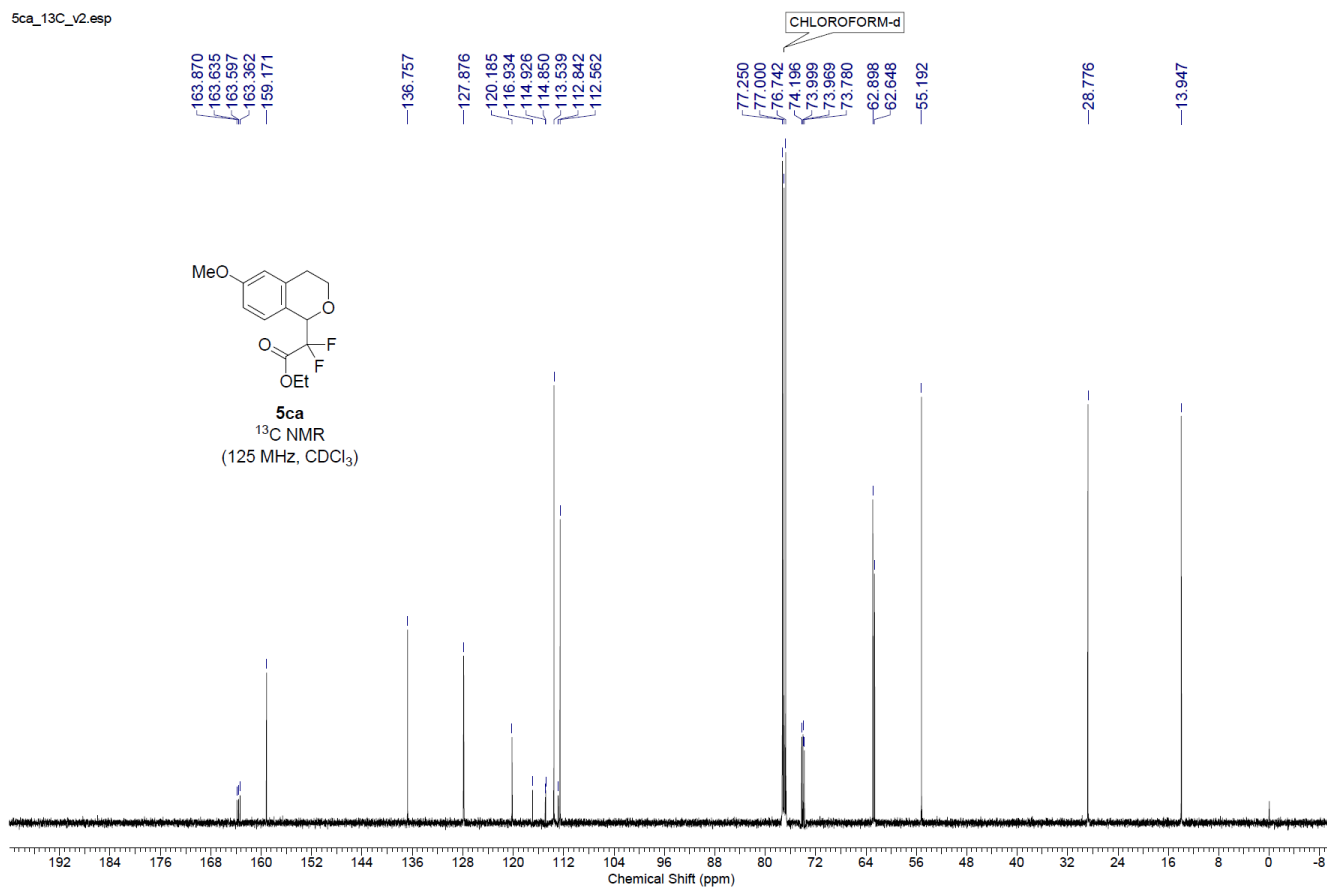

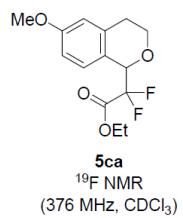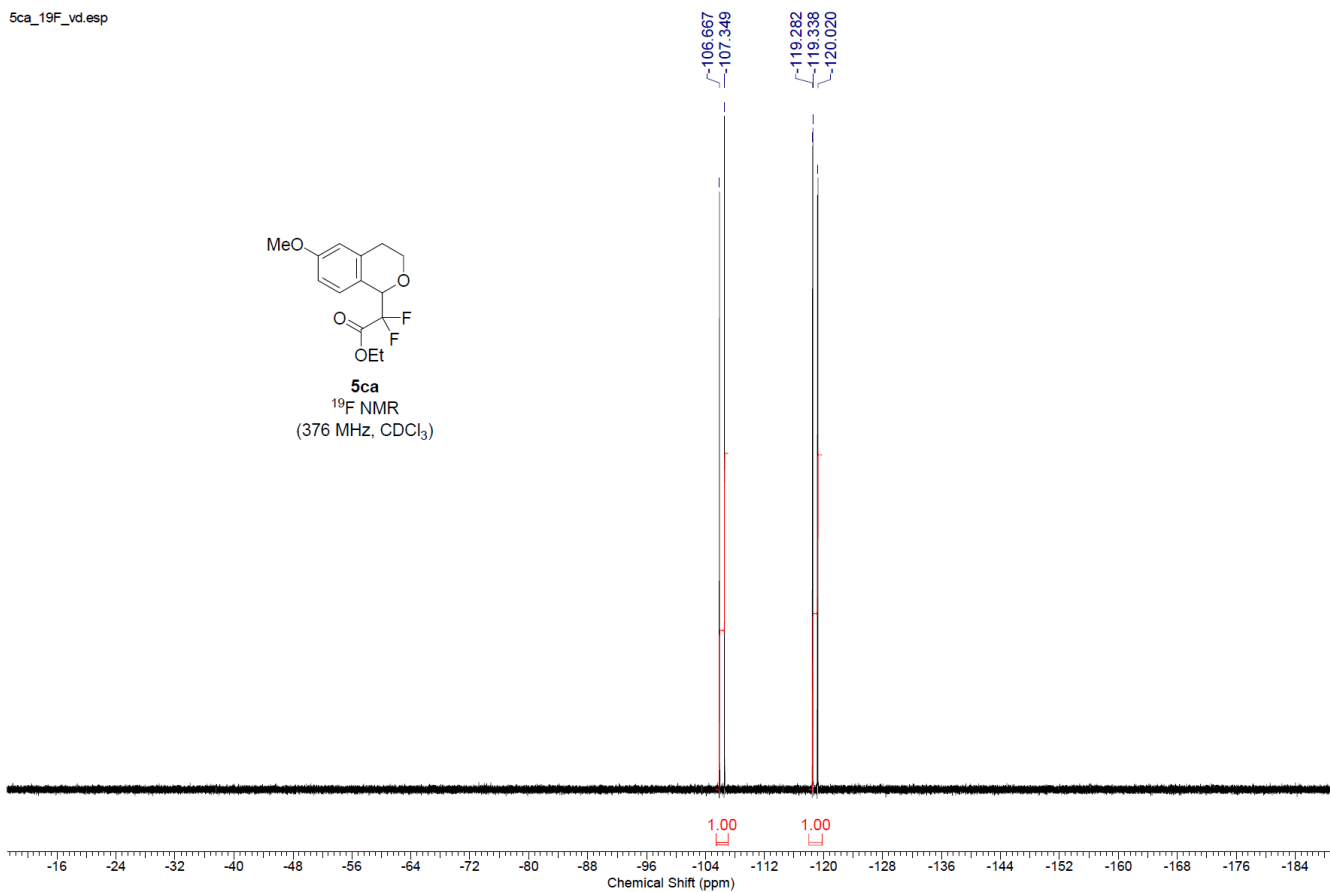

5da\_1H.esp

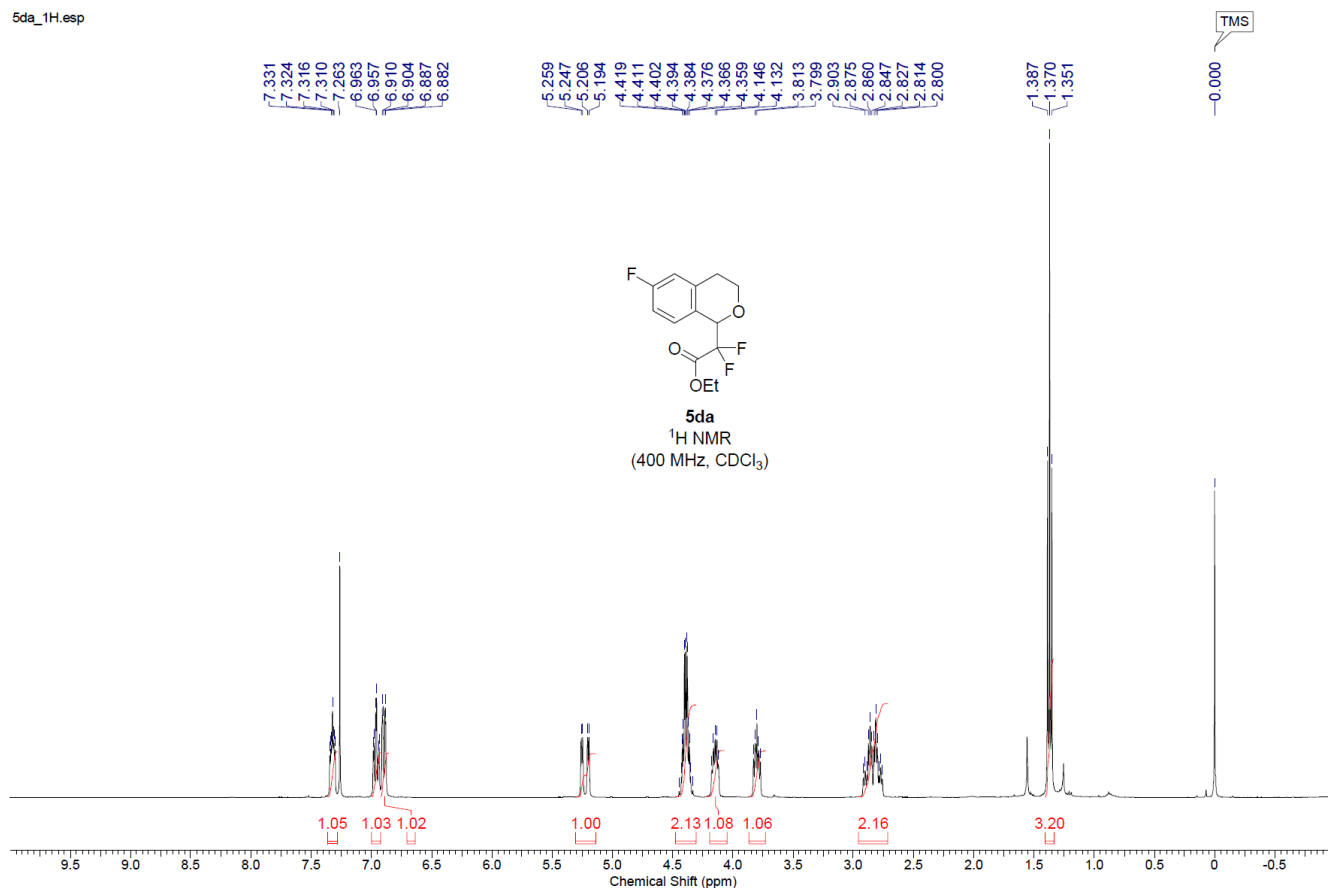

5da\_13C.esp

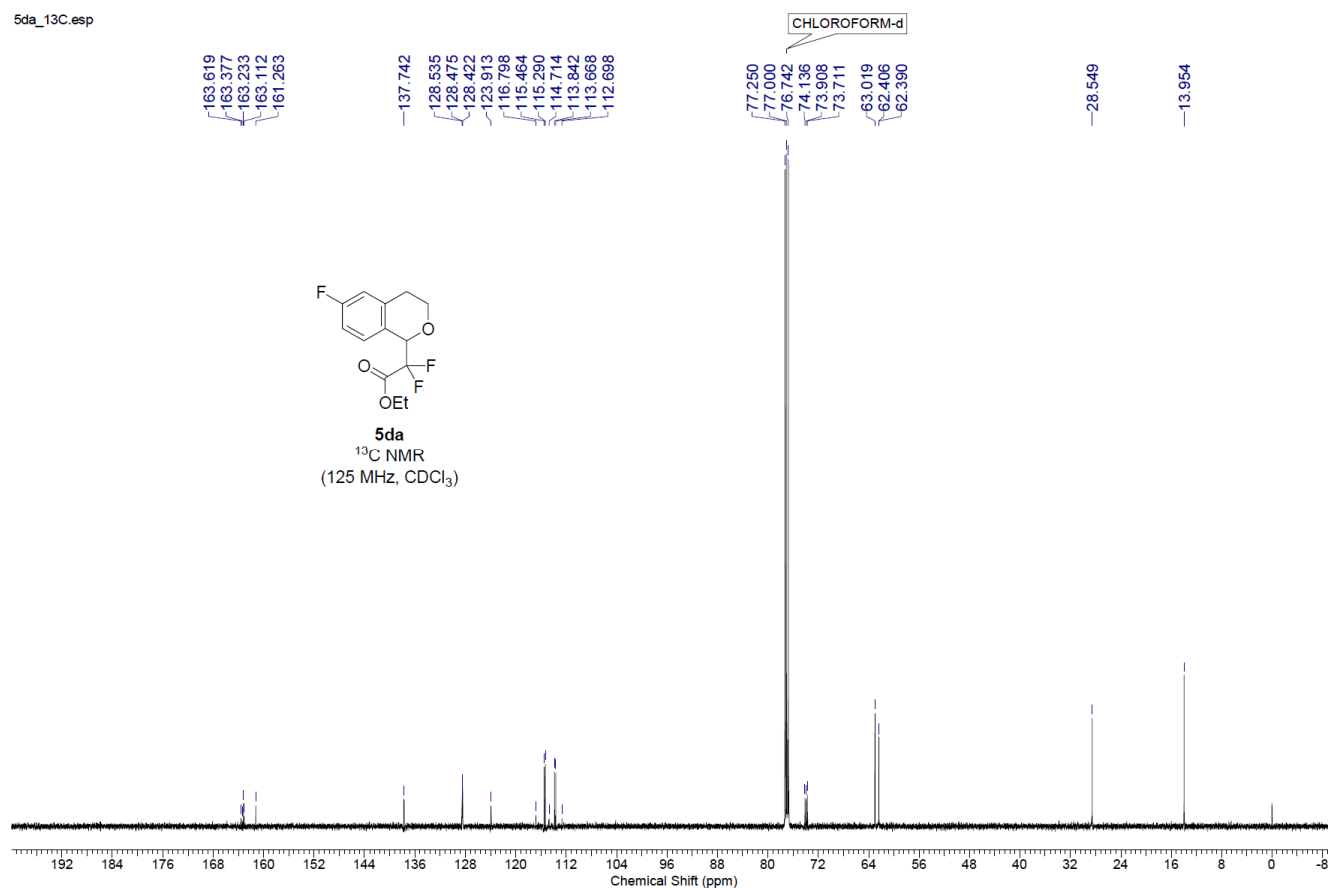

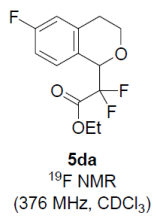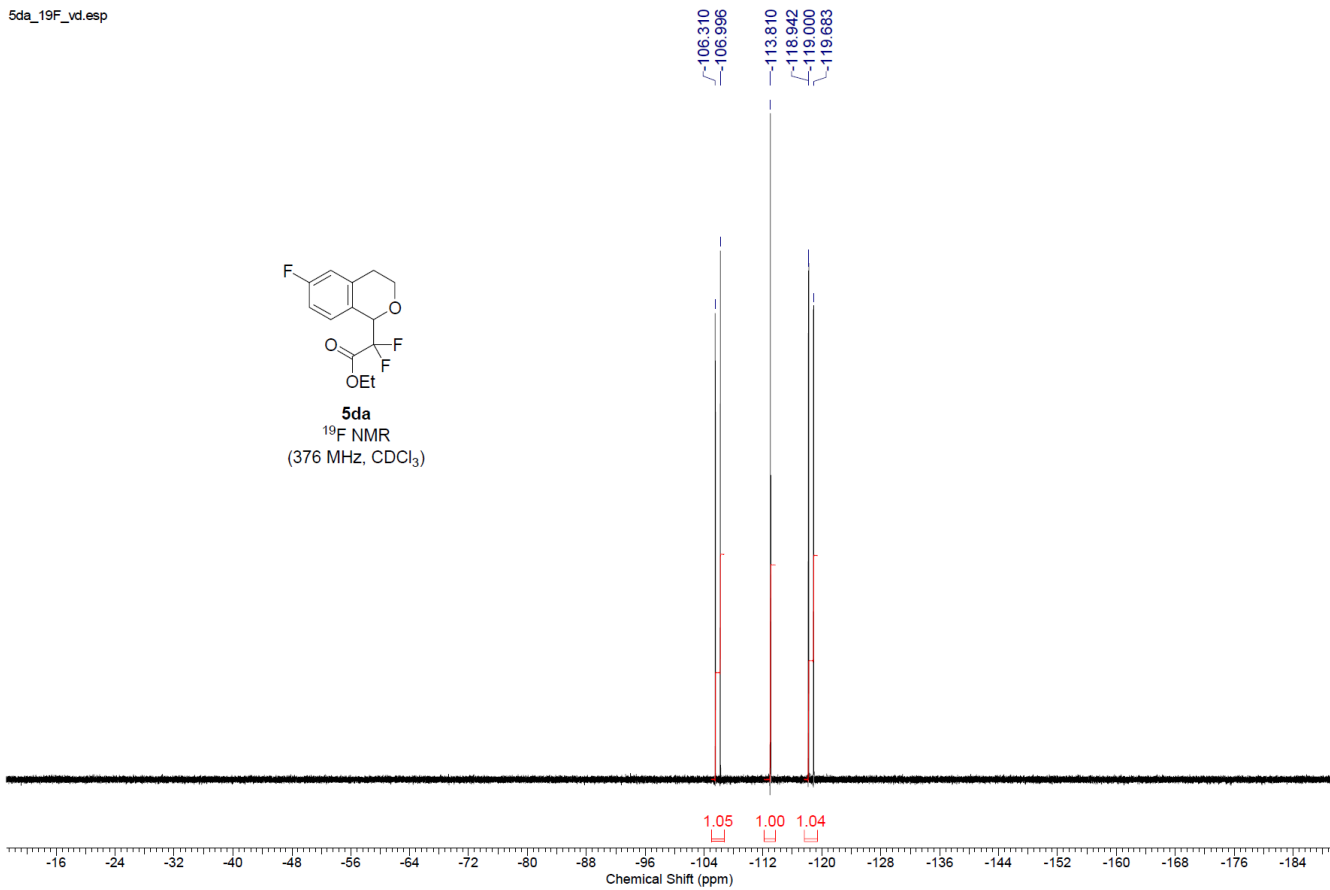

5ea\_1H.esp

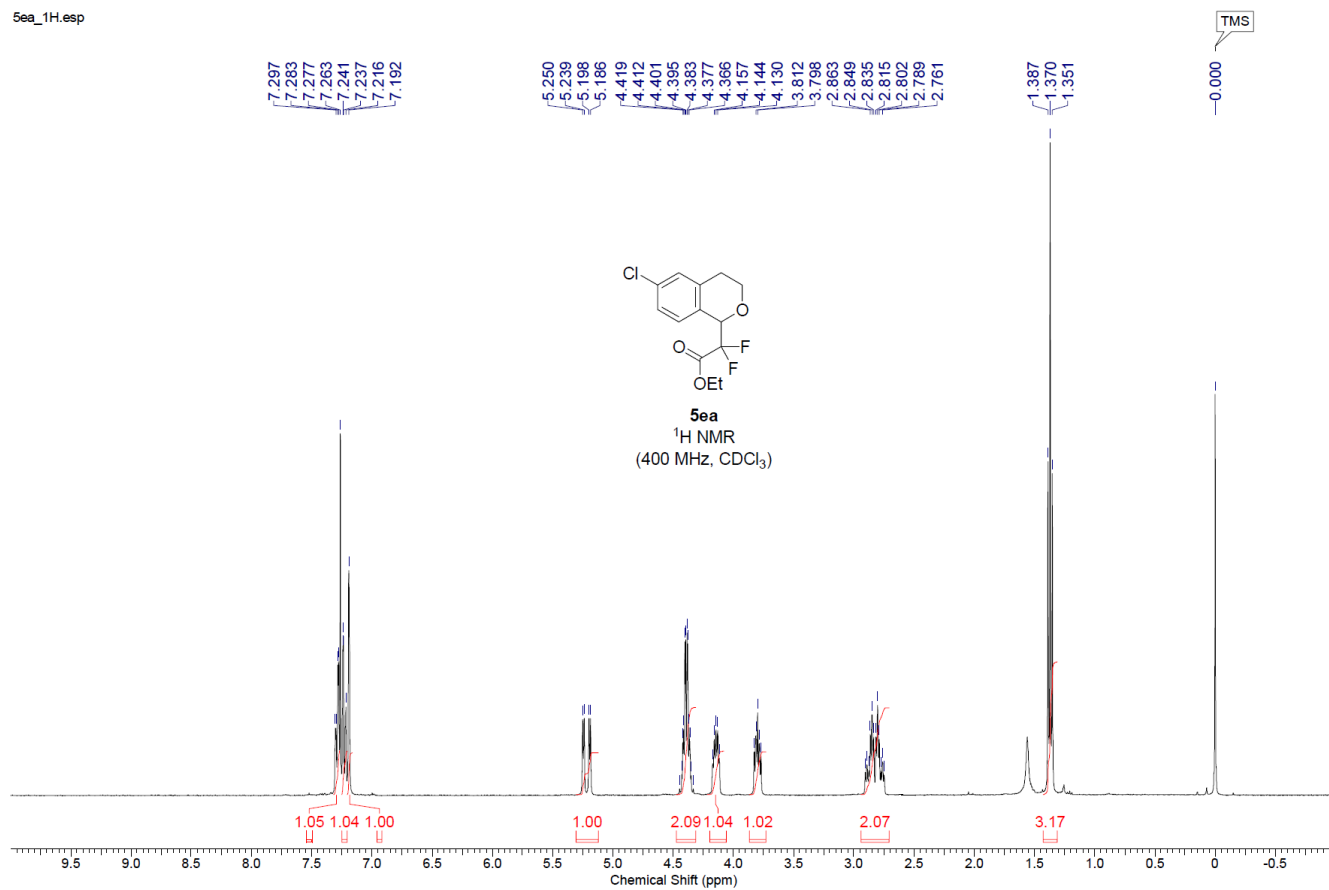

5ea\_13C.esp

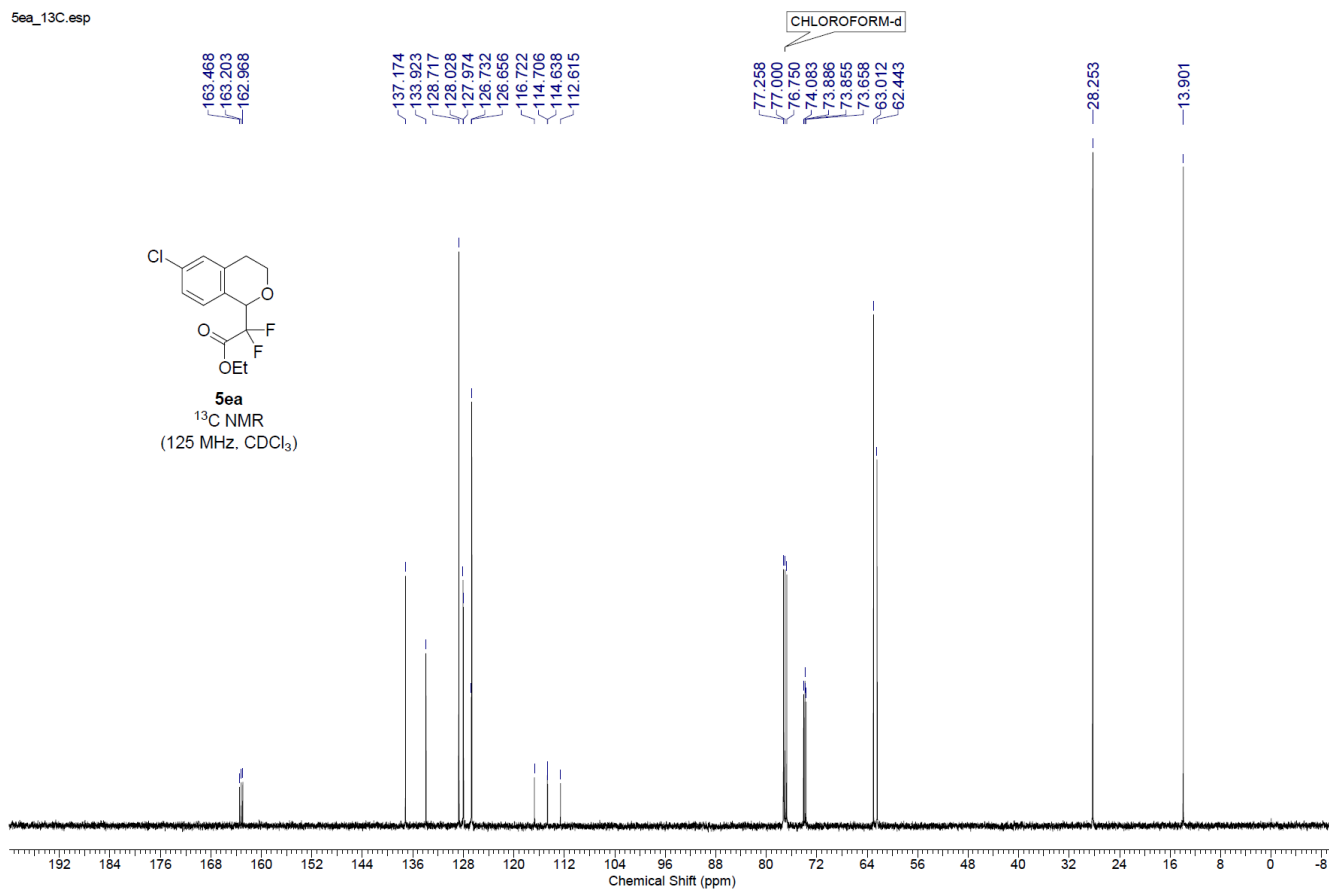

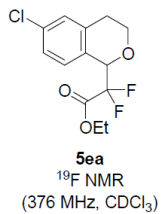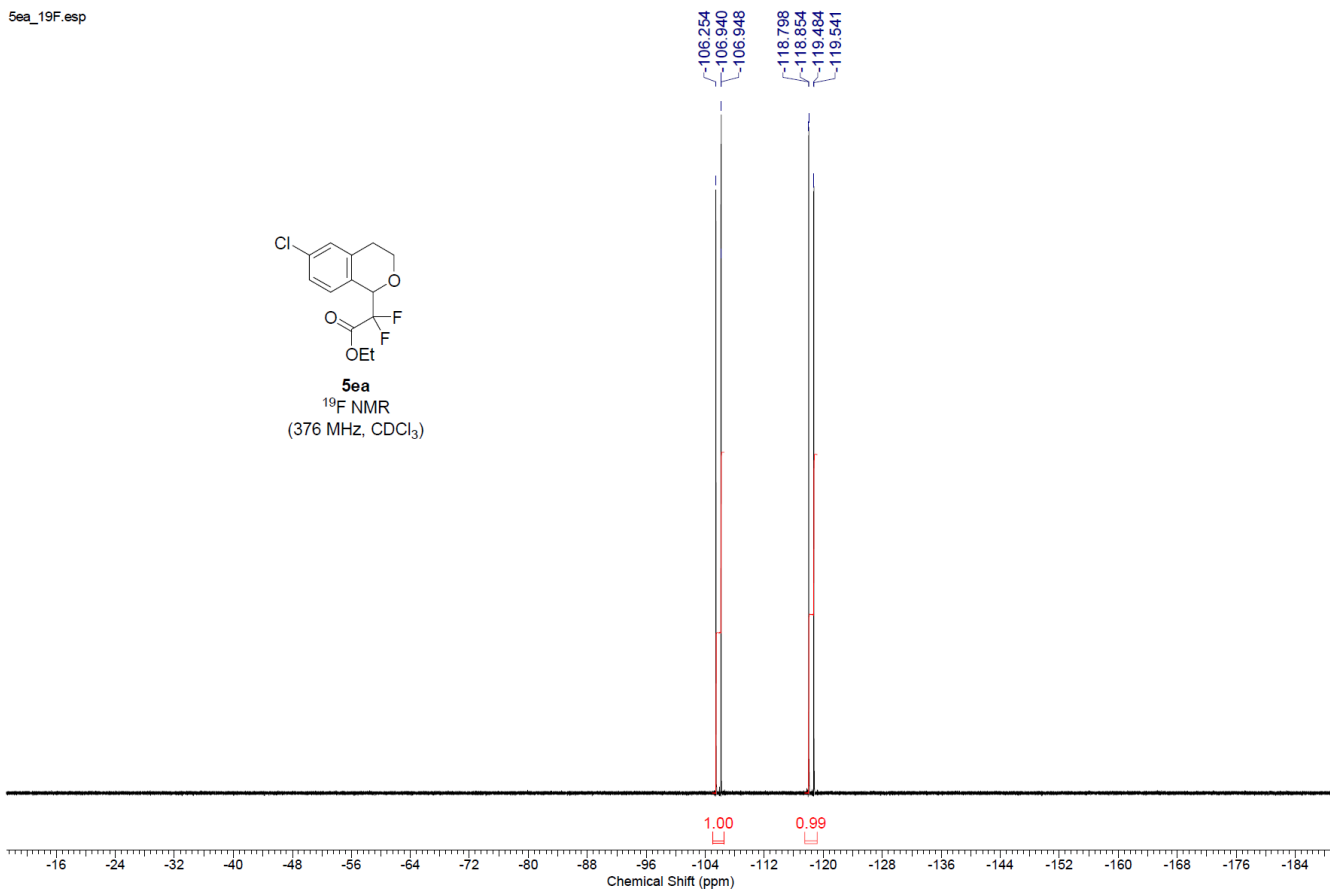

5fa\_1H.esp

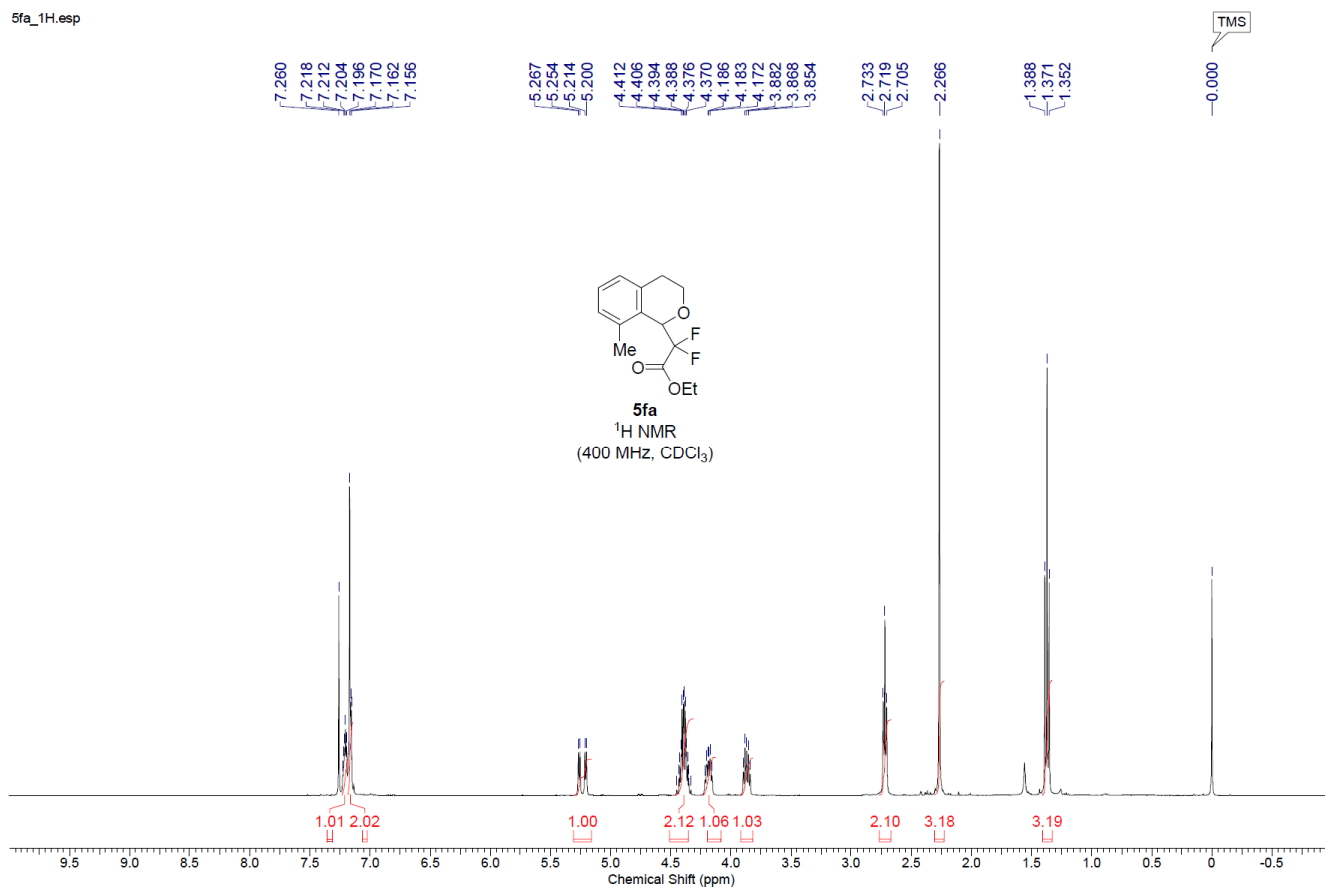

5fa\_13C.esp

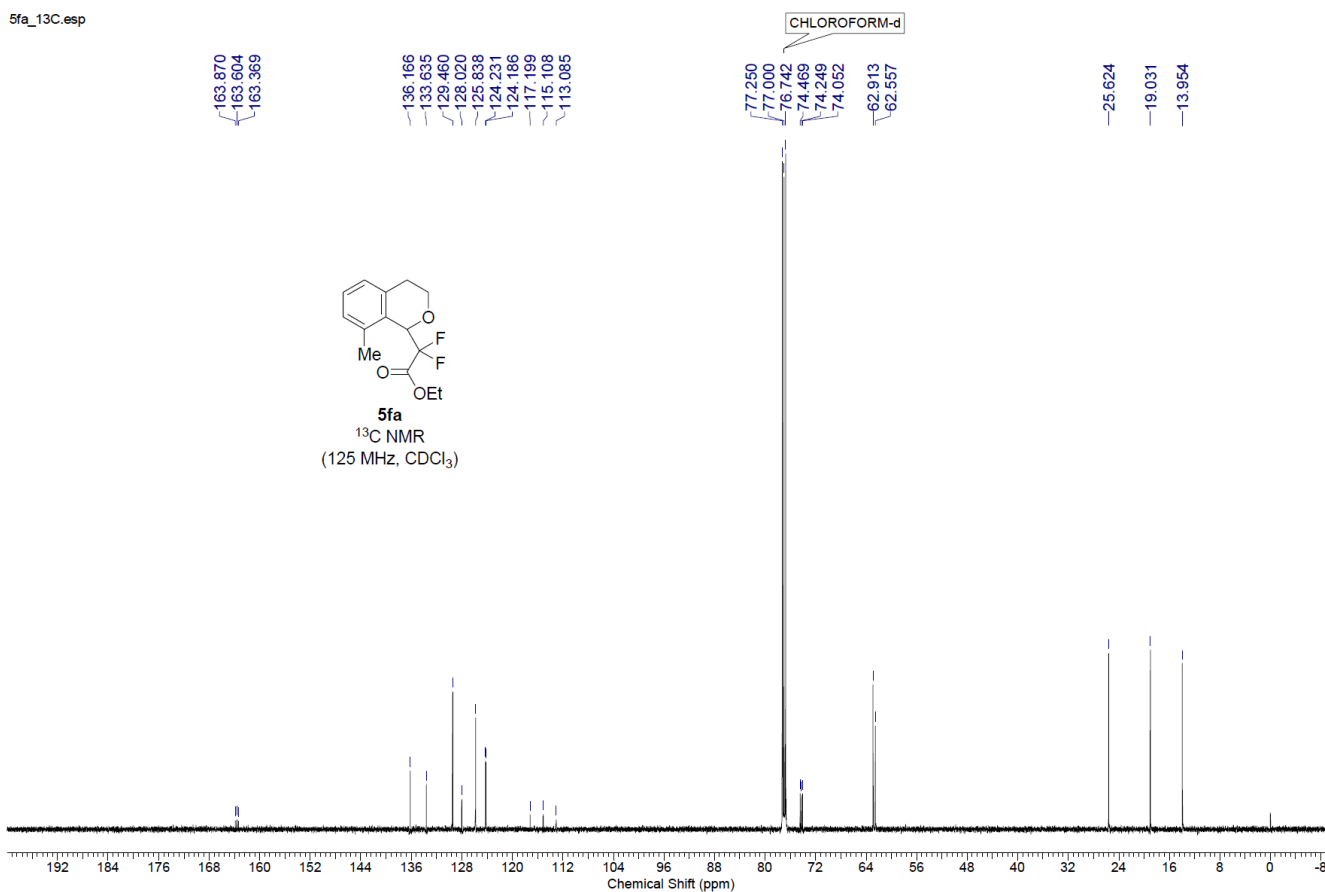



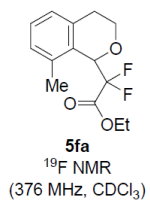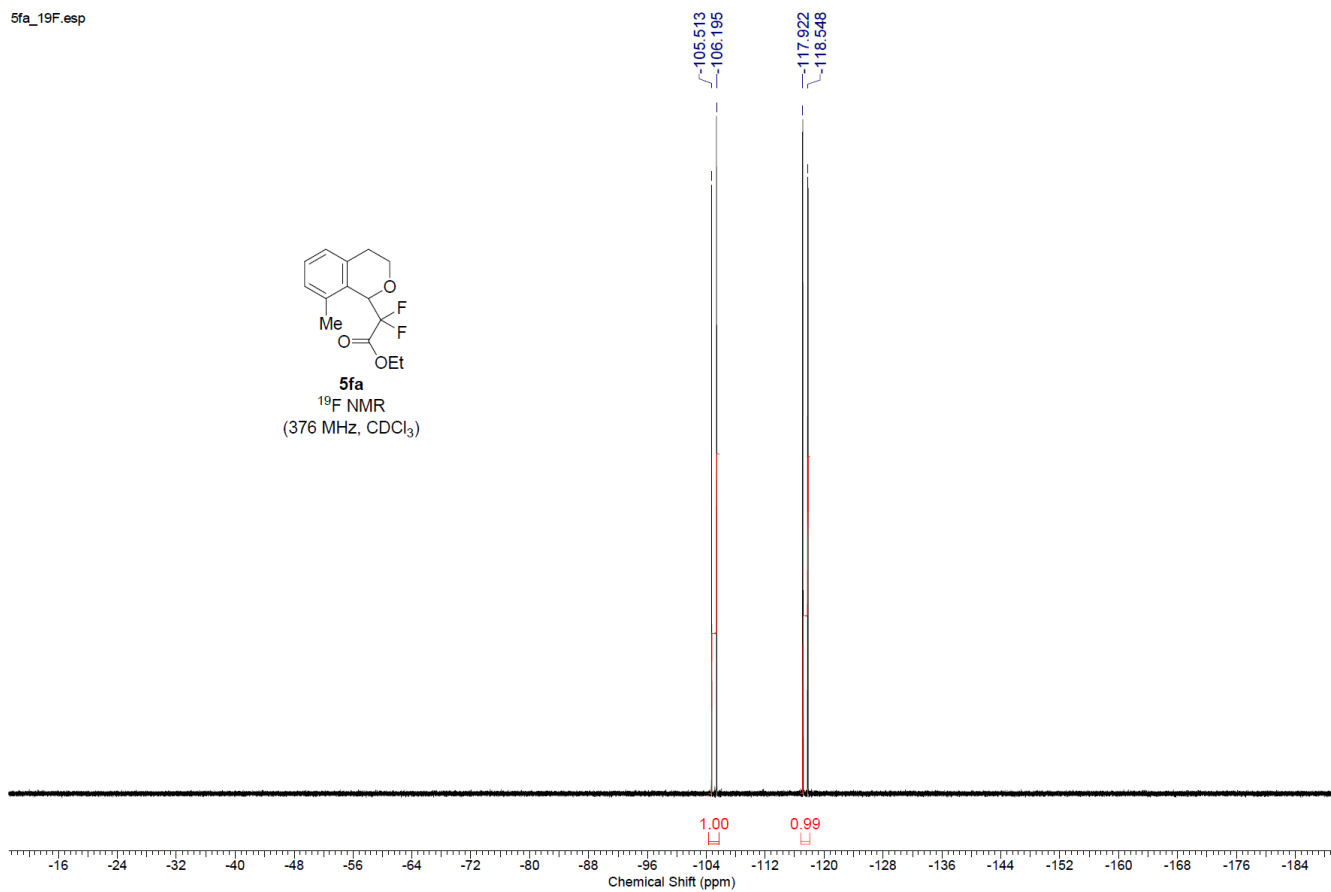

5af\_1H.esp

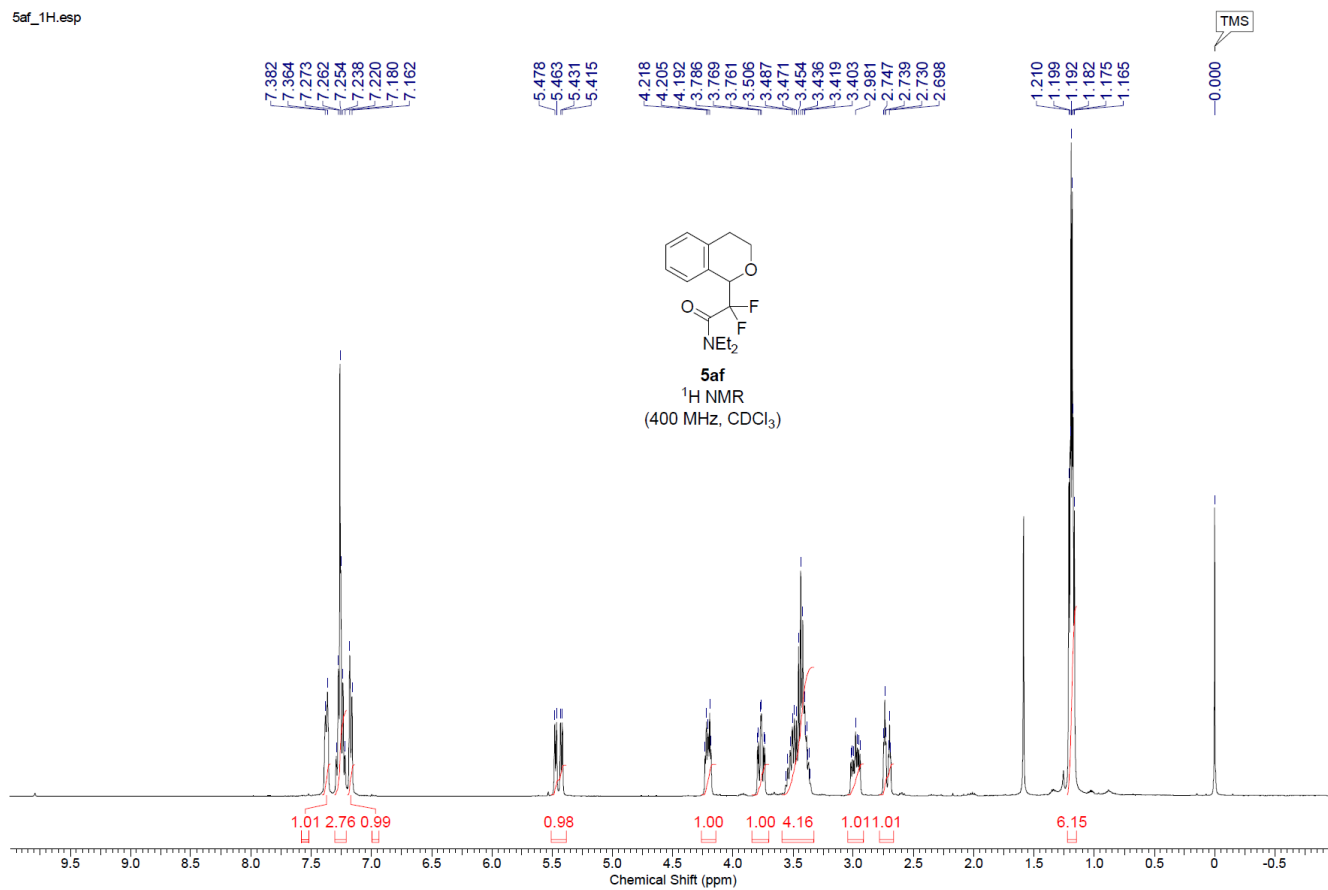

5af\_13C.esp

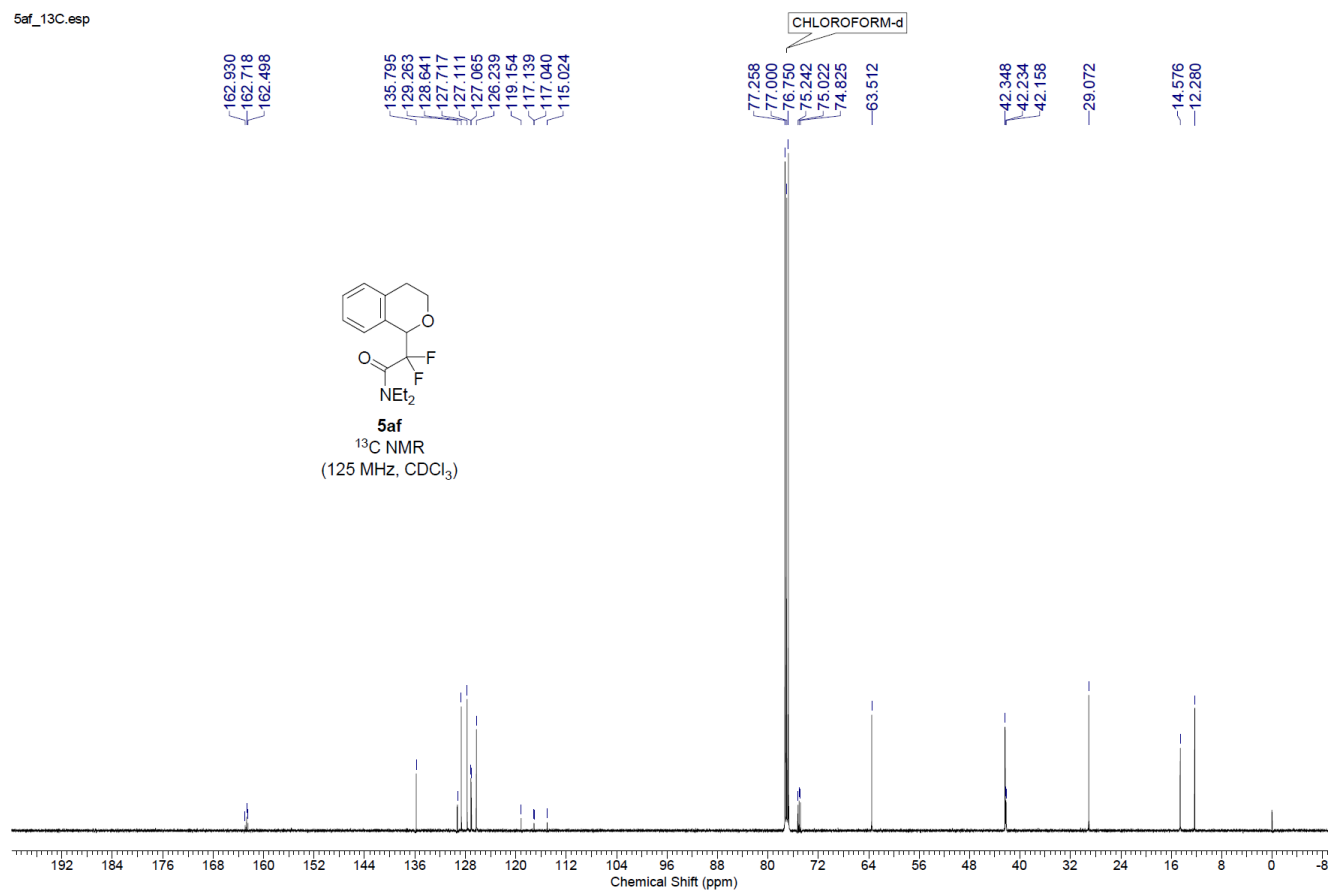

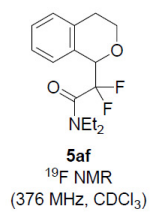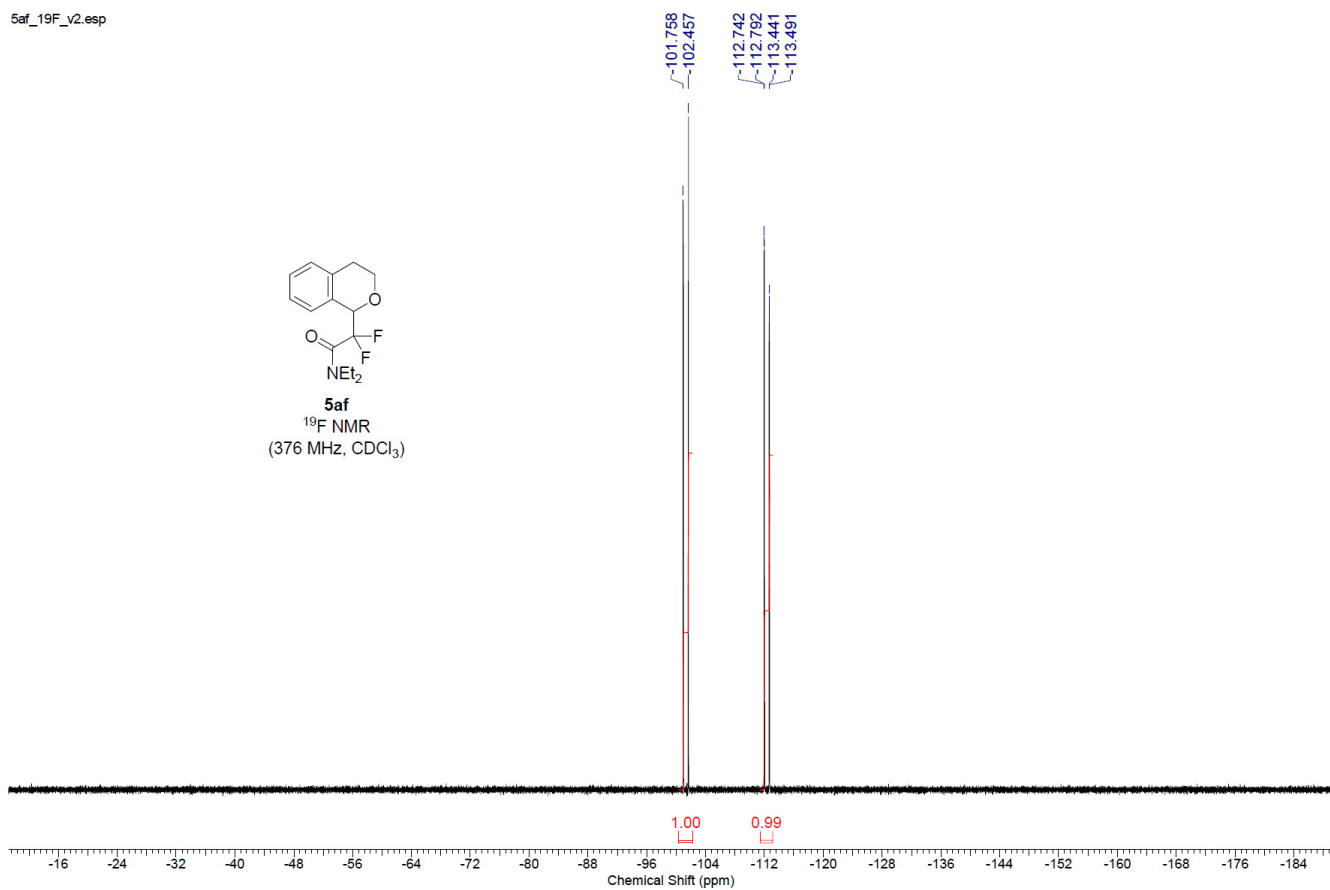

6\_1H\_v2.esp

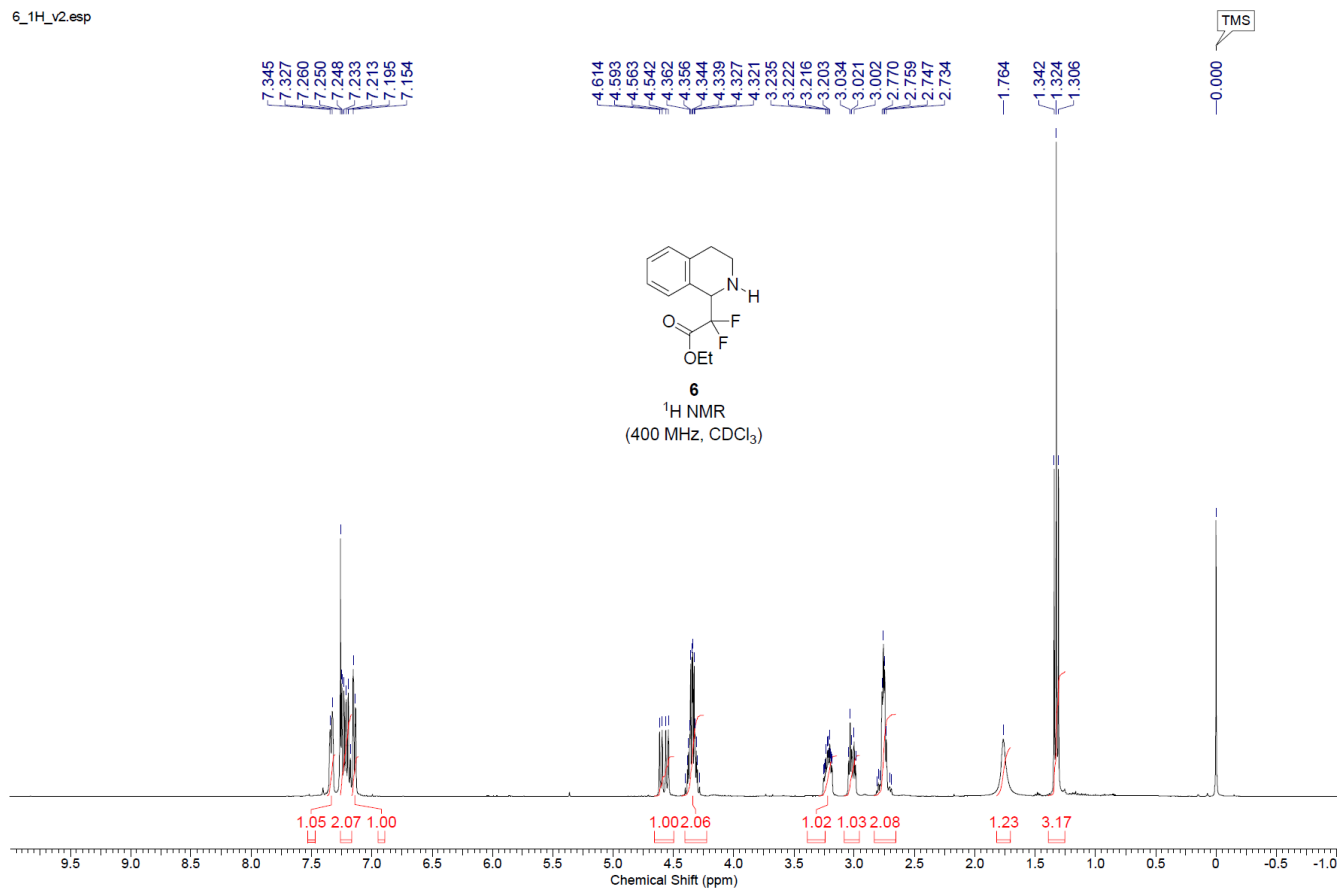

6\_13C.esp

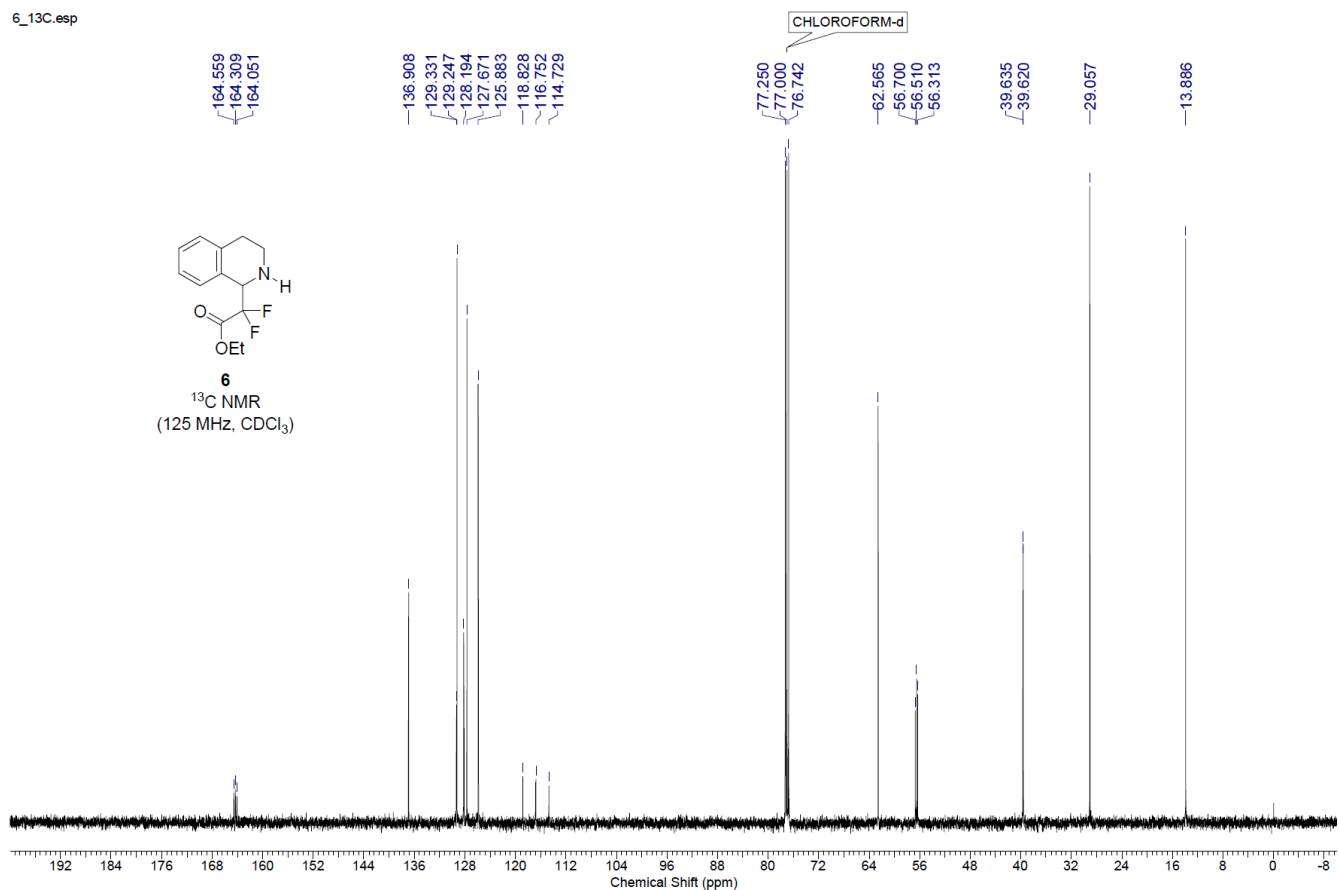

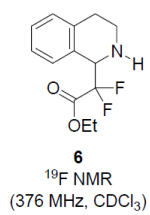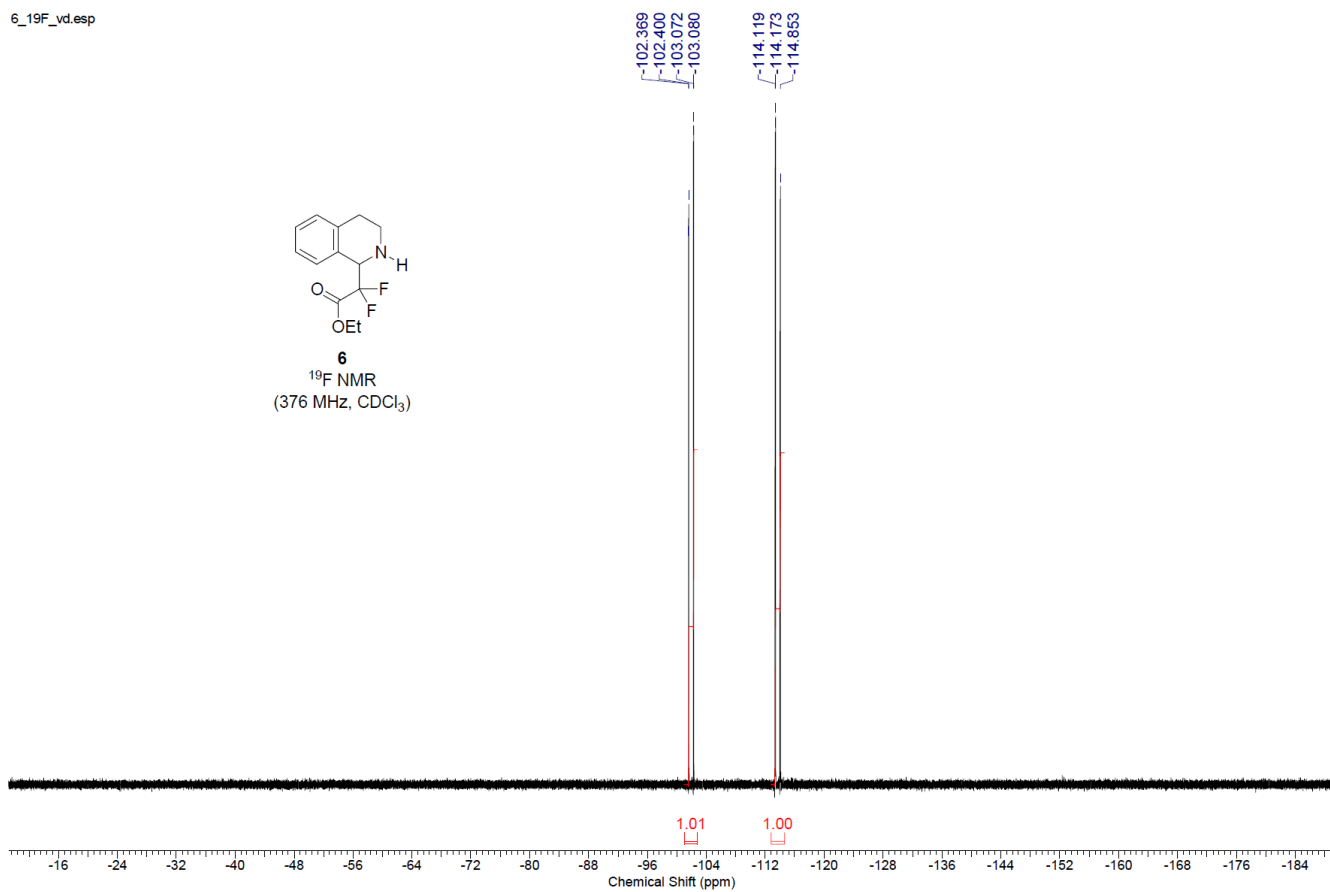

1l\_1H\_va.esp

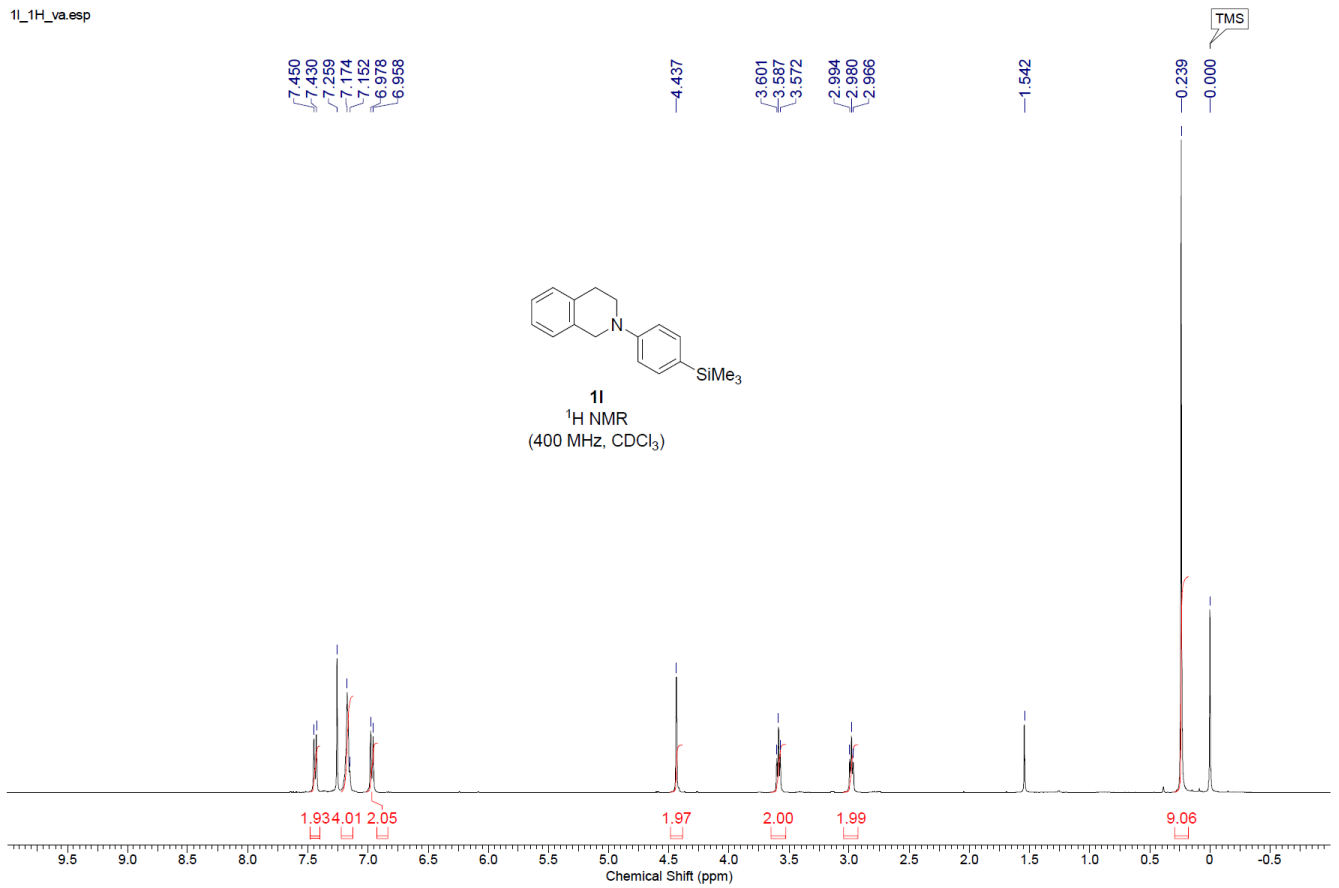

1l\_13C\_va.esp

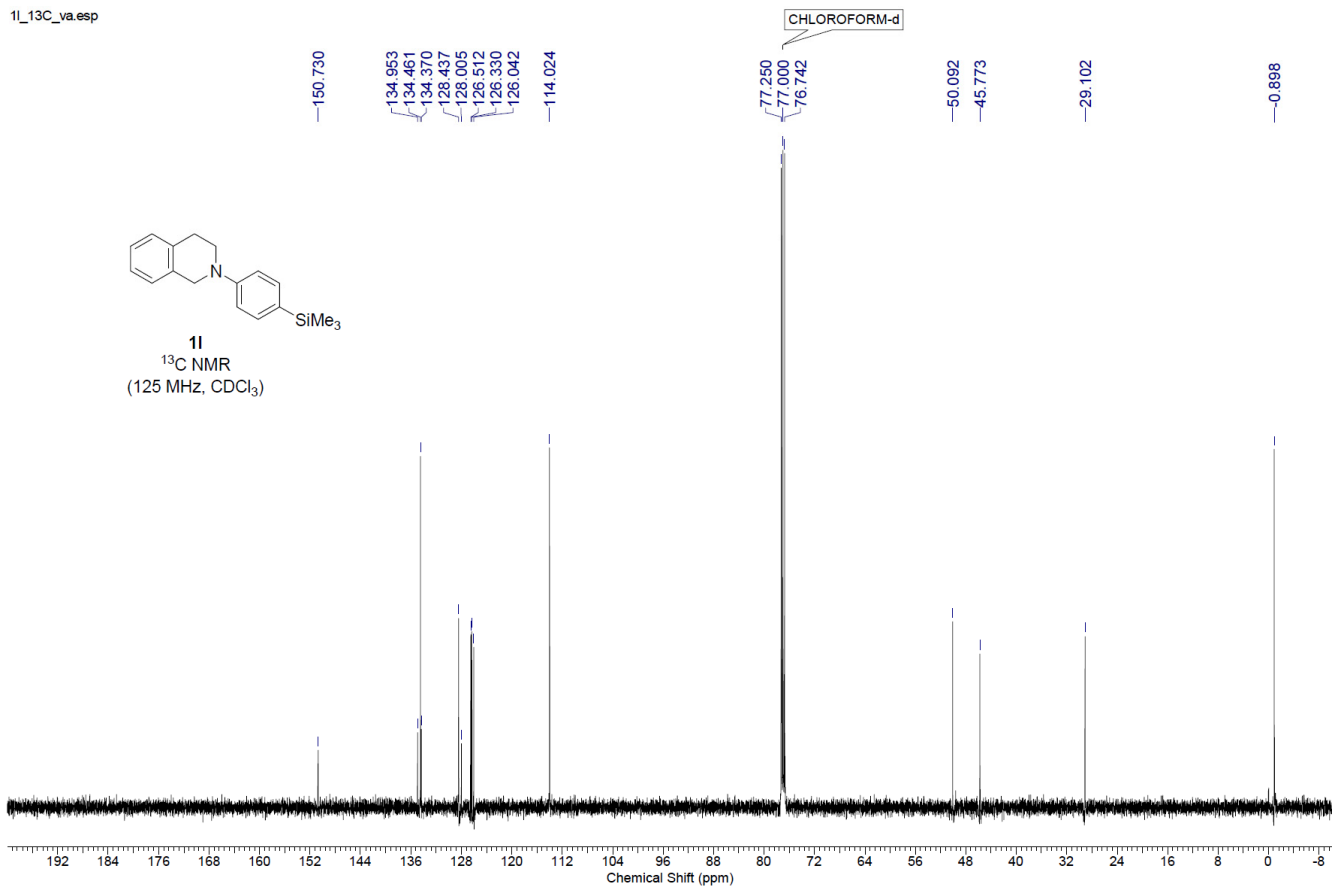

1p\_1H\_vn.esp

TMS

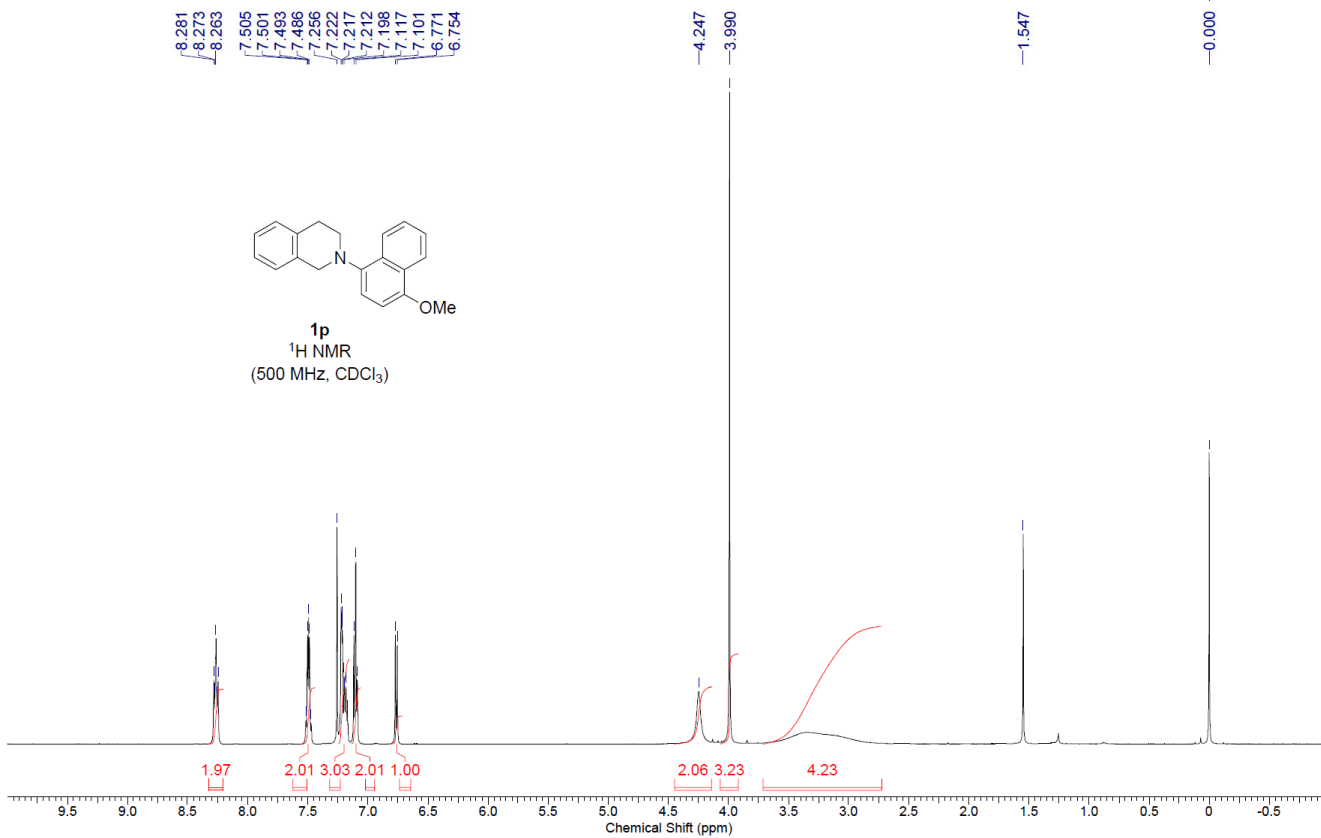

1p\_13C\_vn.esp

CHLOROFORM-d

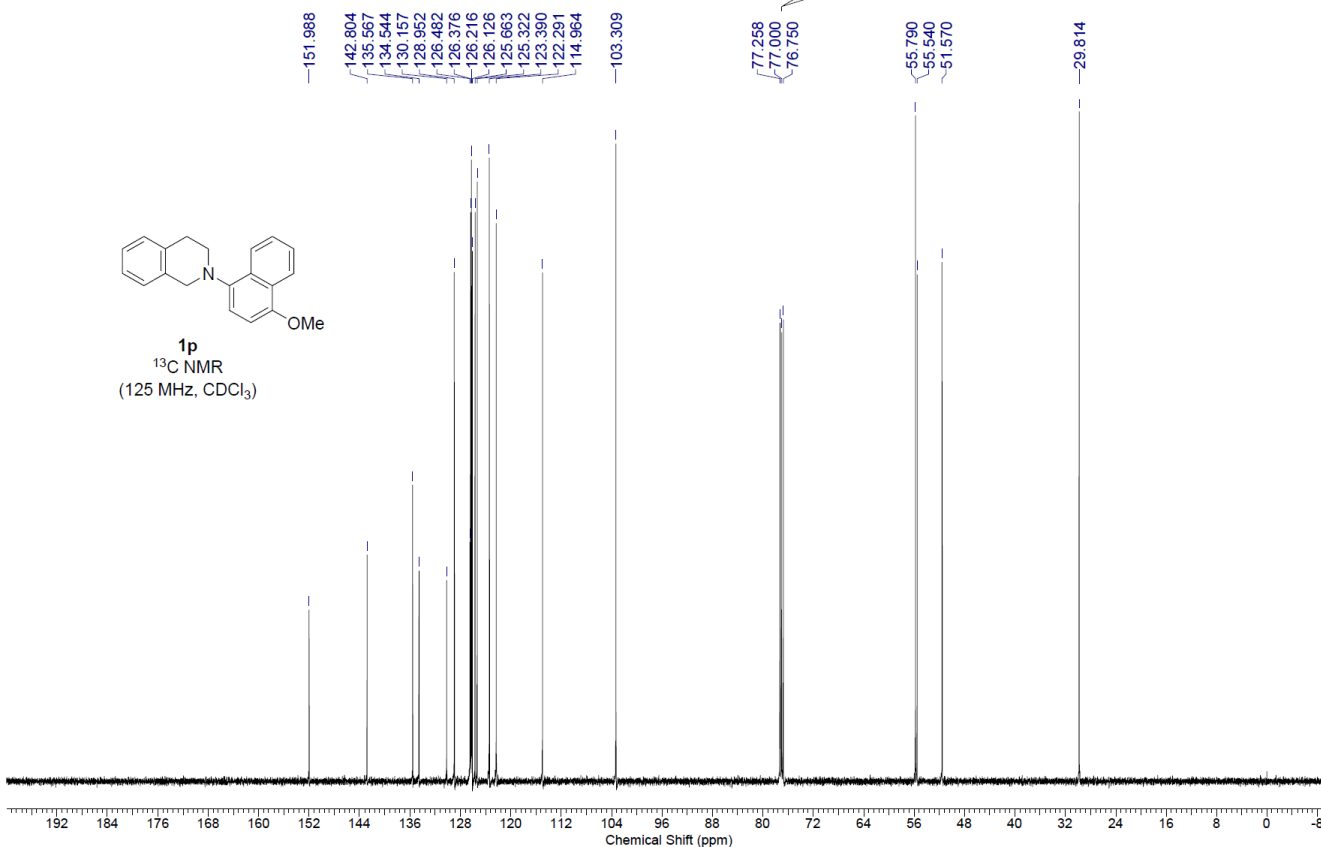

1r\_1H\_vn.esp

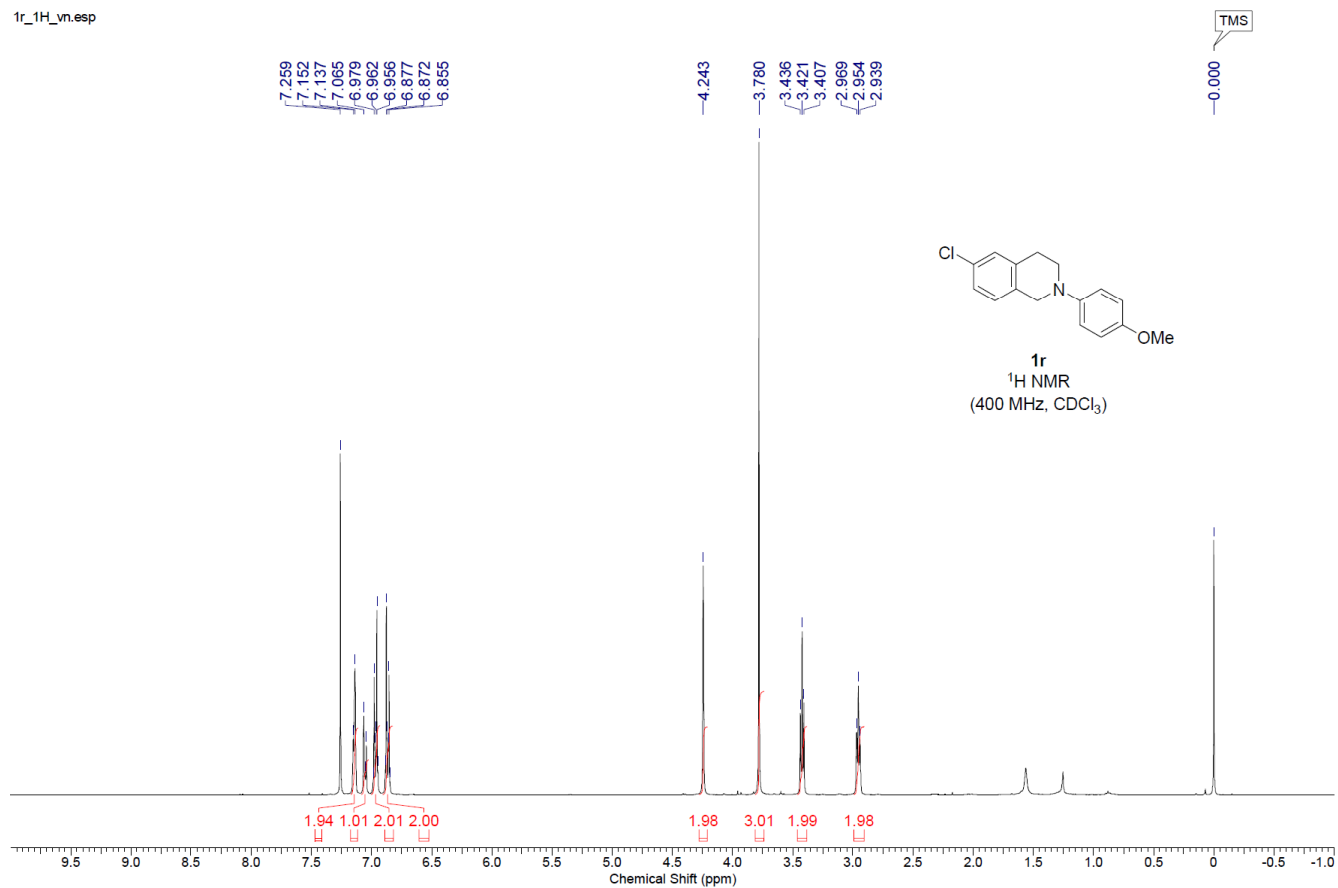

1r\_13C\_vn.esp

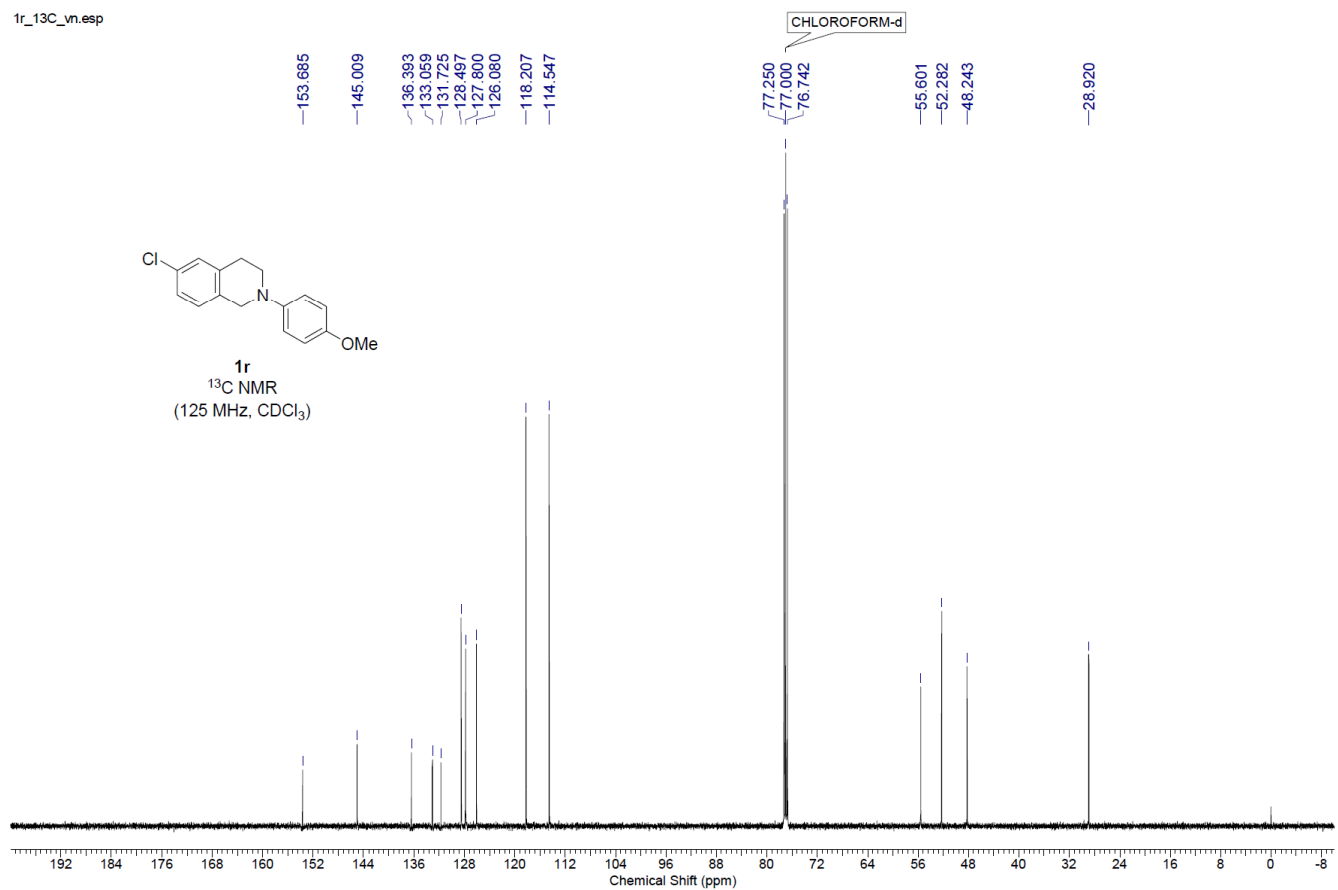



4b\_1H.esp

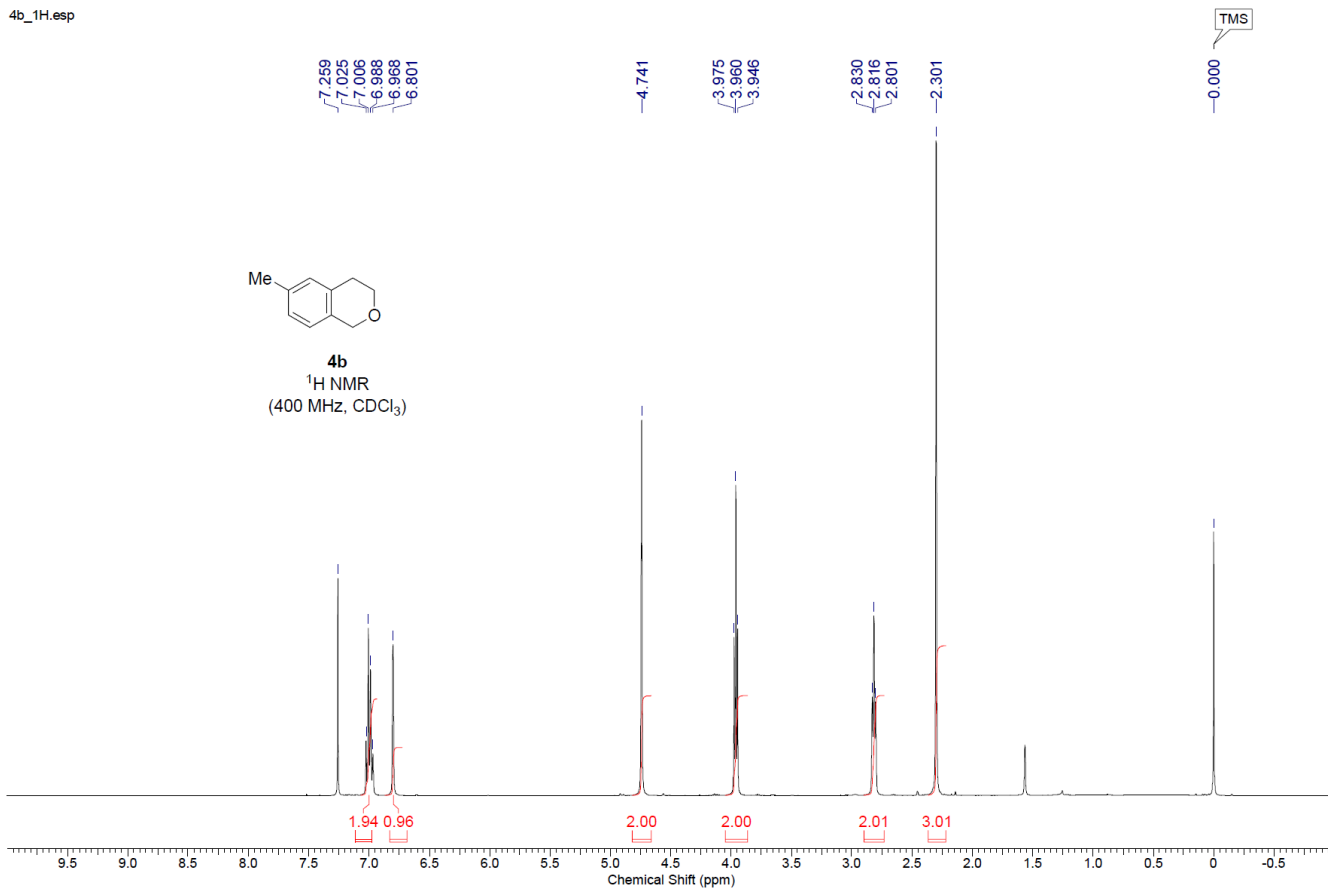

4b\_13C.esp

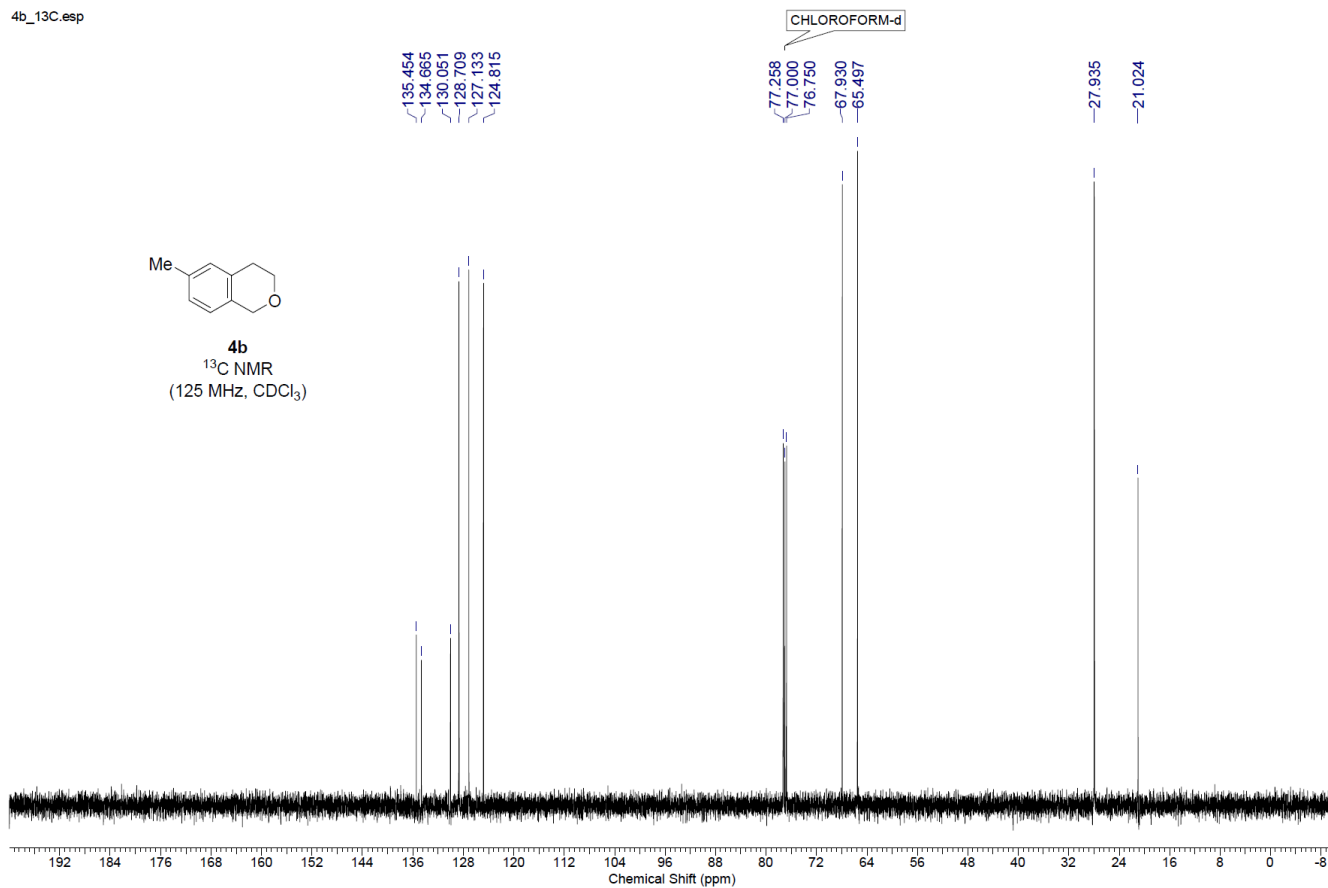

4f\_1H.esp

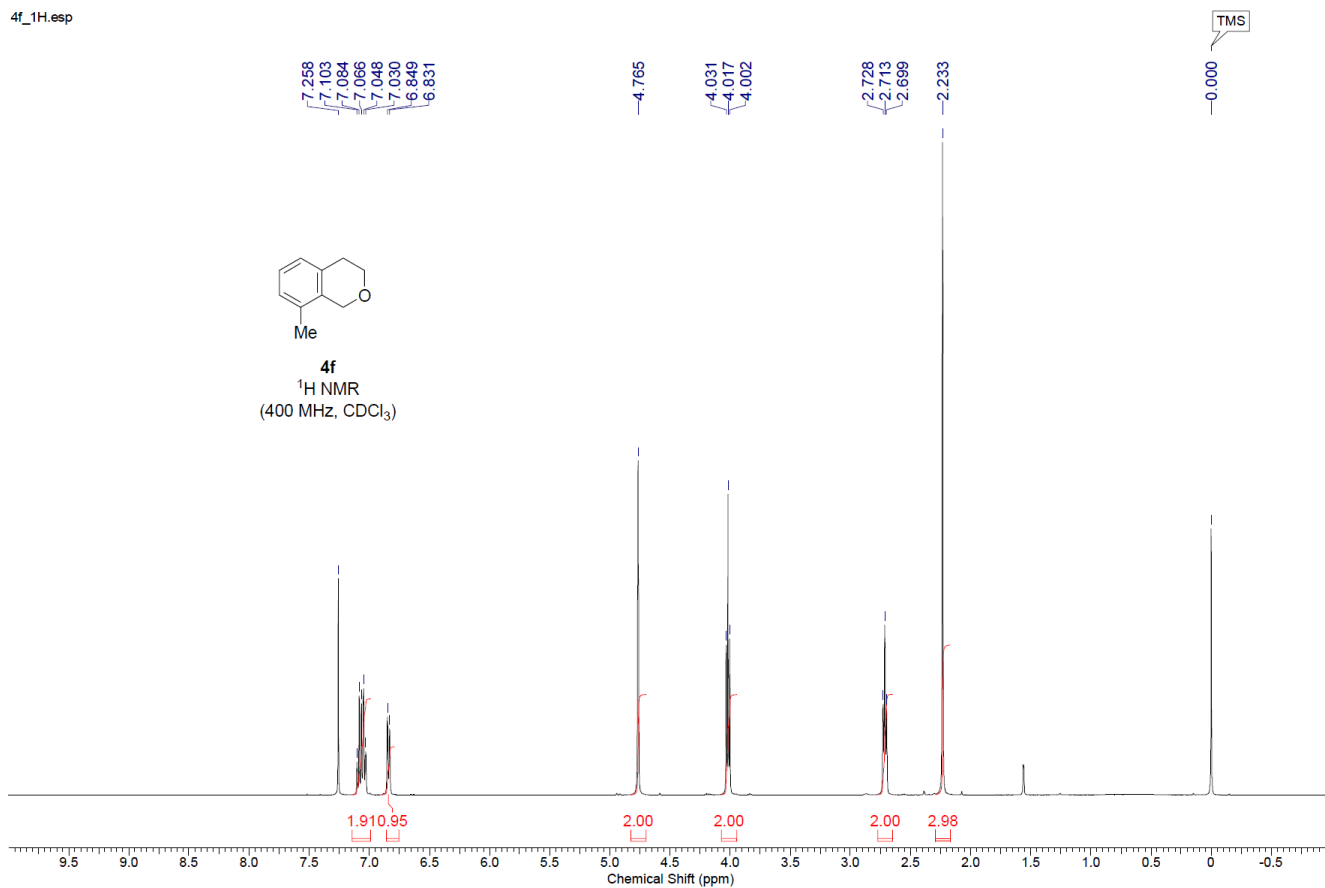

4f\_13C.esp

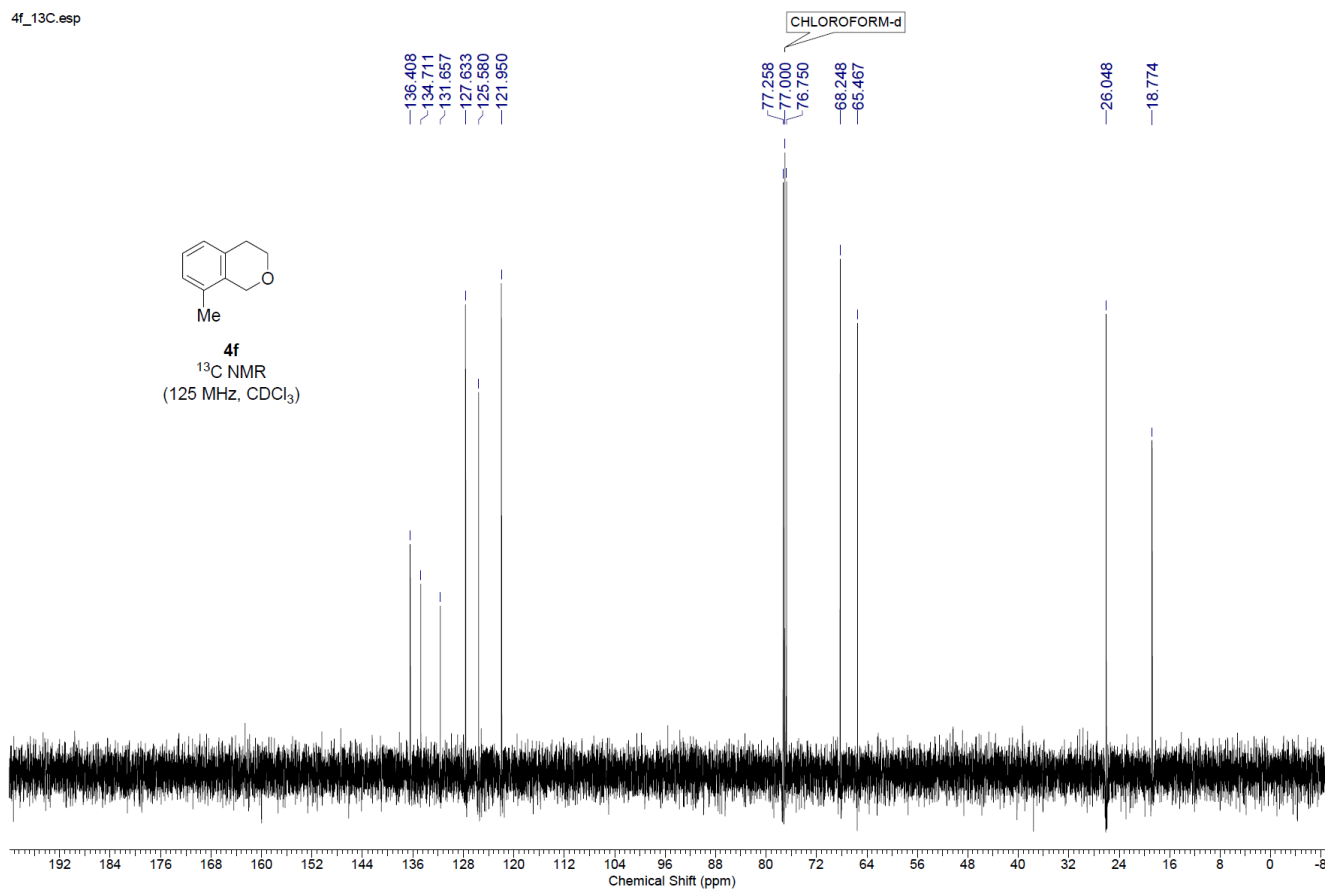

Supplement: d4cc02033b1.pdf [file d4cc02033b1.pdf]
